# Supplementary material for: A Phase II Trial of Guadecitabine plus Atezolizumab in Metastatic Urothelial Carcinoma Progressing after Initial Immune Checkpoint Inhibitor Therapy
Source: Oxford University Press journal article supplement (doi:10.1158/1078-0432.ccr-22-3642), 2023-03-16
Supplement: ccr-22-3642_figure_s4_suppfs4.docx [file ccr-22-3642_figure_s4_suppfs4.docx]

**
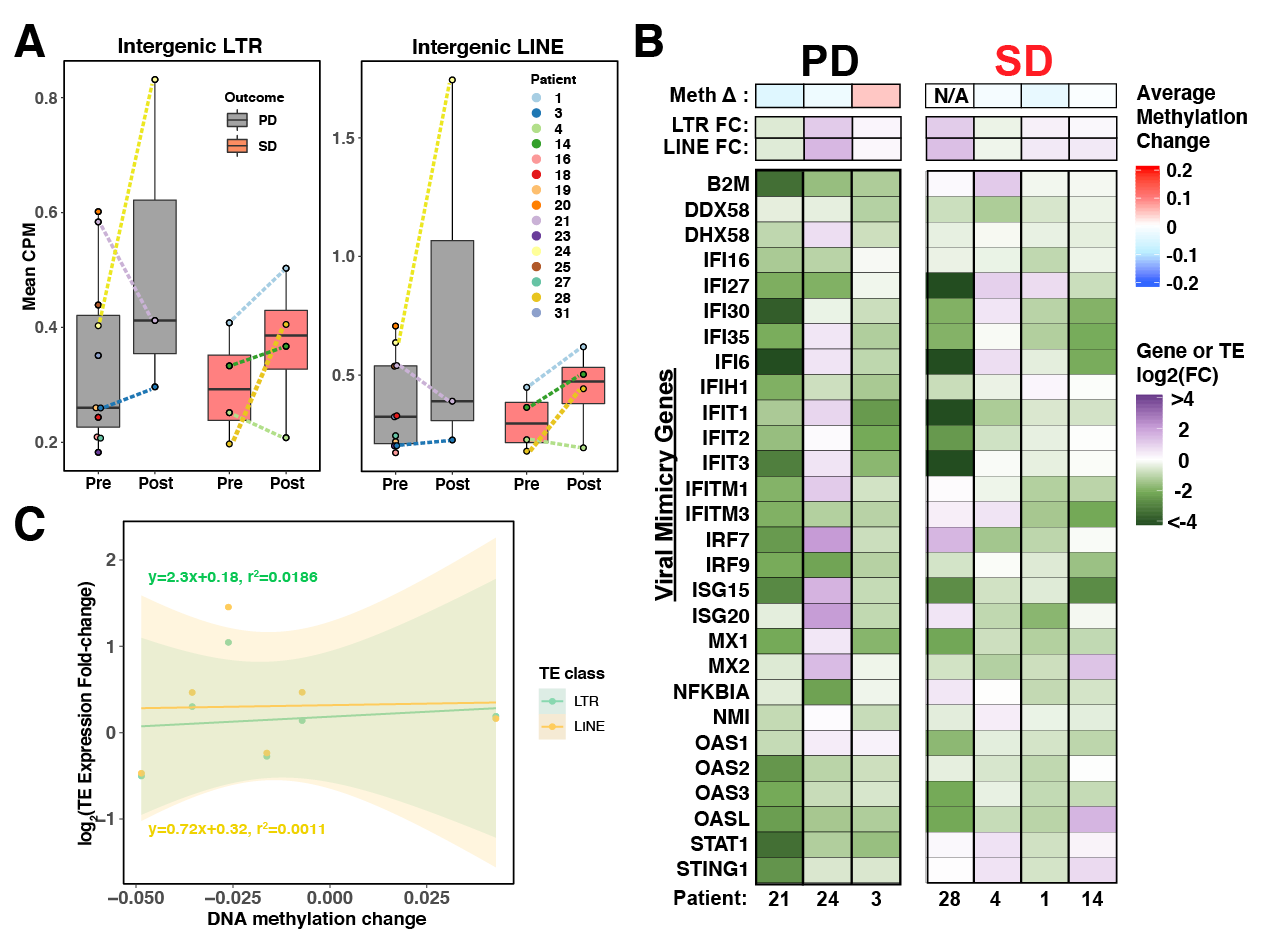
**

**Supplementary Figure 4: Weak correlation of TE expression induction with DNA methylation change and viral mimicry activation.** **A.** Boxplot illustrating the average TE expression (counts per million) in tumor samples. Dotted lines connect tumor pairs from same patient. **B.** Heatmaps representing the average DNA methylation change, intergenic LTR/LINE expression fold-change and viral mimicry gene expression fold-change comparing pre-treatment and post-treatment UC tumors from this study. **C.** Correlation between TE expression fold-change and DNA methylation change induced by combination therapy.
