# Supplementary material for: A Phase II Trial of Guadecitabine plus Atezolizumab in Metastatic Urothelial Carcinoma Progressing after Initial Immune Checkpoint Inhibitor Therapy
Source: Oxford University Press journal article supplement (doi:10.1158/1078-0432.ccr-22-3642), 2023-03-16
Supplement: ccr-22-3642_figure_s5_suppfs5.docx [file ccr-22-3642_figure_s5_suppfs5.docx]

**
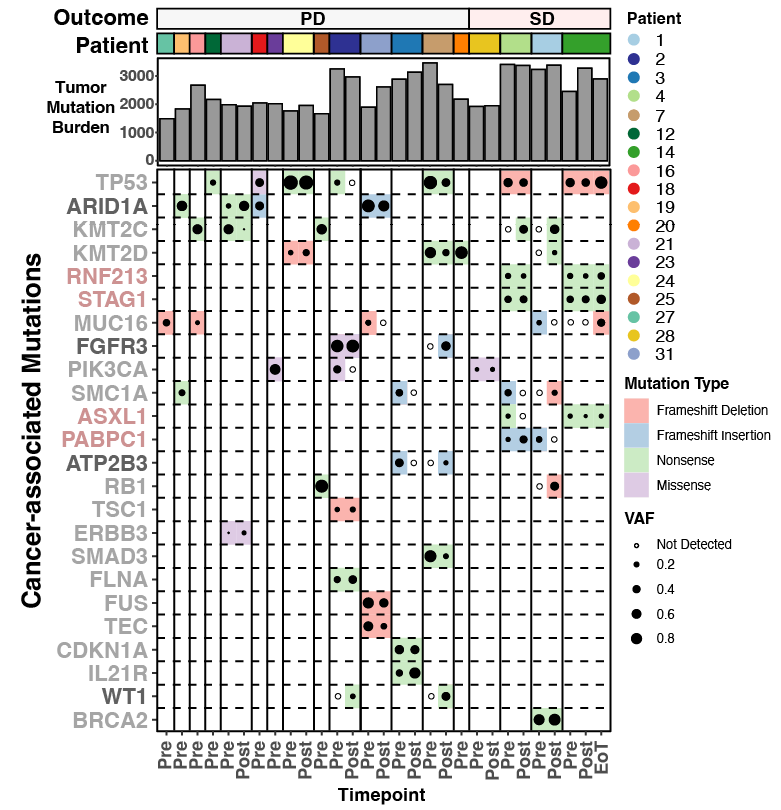
**

**Supplementary Figure 5: Overall tumor mutation burden and frequency of mutations in cancer-associated genes in UC tumors.**
