# Supplementary material for: A Phase II Trial of Guadecitabine plus Atezolizumab in Metastatic Urothelial Carcinoma Progressing after Initial Immune Checkpoint Inhibitor Therapy
Source: Oxford University Press journal article supplement (doi:10.1158/1078-0432.ccr-22-3642), 2023-03-16
Supplement: ccr-22-3642_figure_s8_suppfs8.docx [file ccr-22-3642_figure_s8_suppfs8.docx]

**
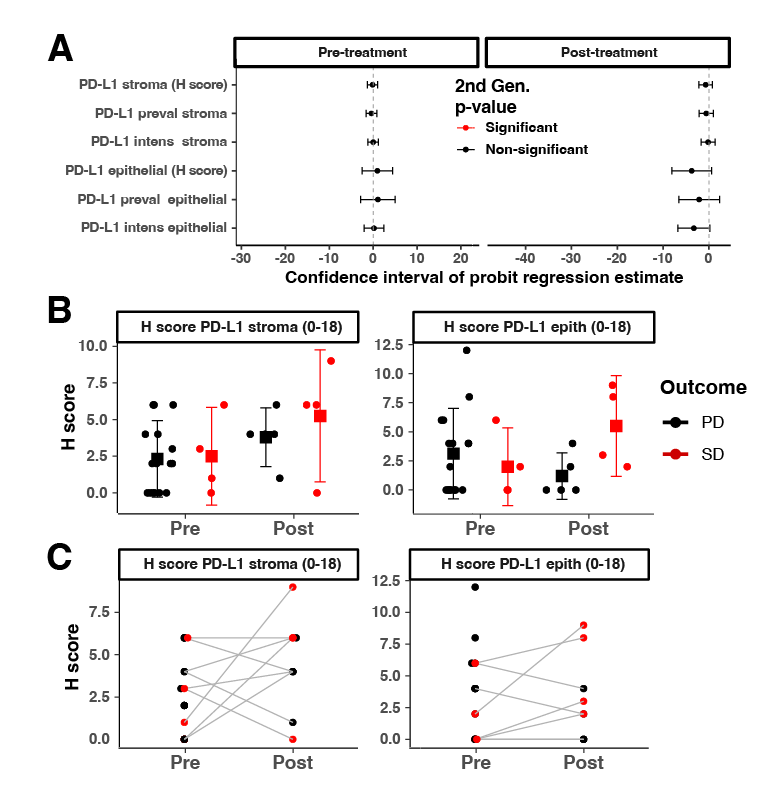
**

**Supplementary Figure 8: PD-L1 levels in tumor or tumor microenvironment does not associate with tumor progression or control. A.** Cumulative probit ordinal mixed-effects regressions with second generation p-values testing for association between tumor progression and PD-L1 levels in epithelial or stroma compartments. **B.** Histology scoring (H score) of epithelial or stromal P D-L1 levels in PD and SD tumors. Error bars represent means +/- Gini mean difference (a nonparametric measure of dispersion/spread). **C.** H scores comparing the change in epithelial or stromal PD-L1 levels in PD and SD tumors after combination therapy.
