# Supplementary material for: A Phase II Trial of Guadecitabine plus Atezolizumab in Metastatic Urothelial Carcinoma Progressing after Initial Immune Checkpoint Inhibitor Therapy
Source: Oxford University Press journal article supplement (doi:10.1158/1078-0432.ccr-22-3642), 2023-03-16
Supplement: ccr-22-3642_figure_s11_suppfs11.docx [file ccr-22-3642_figure_s11_suppfs11.docx]

**
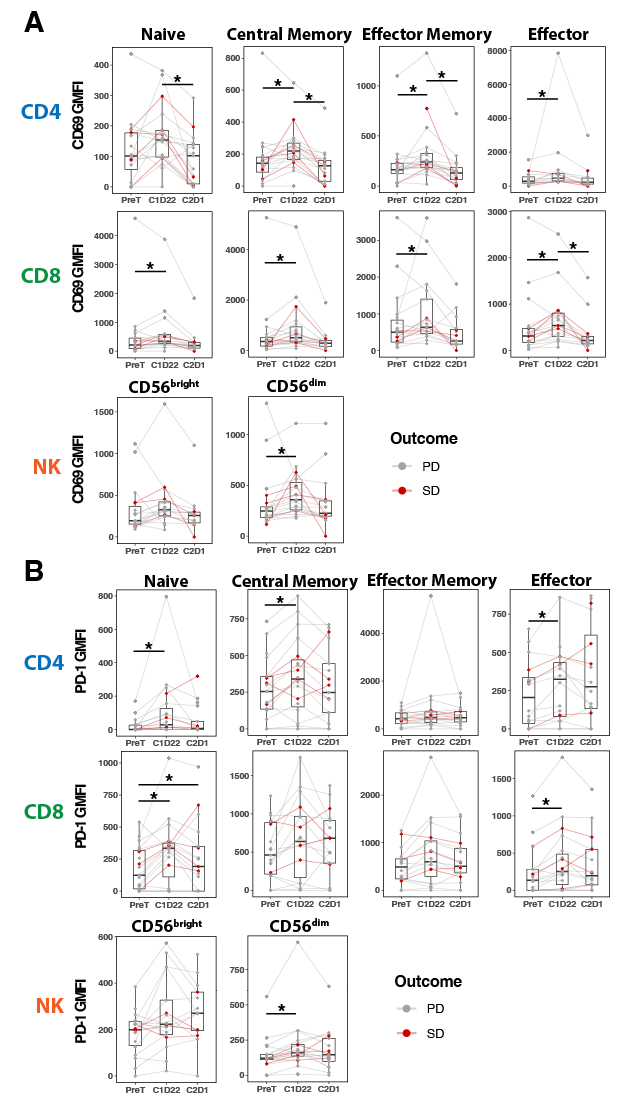
**

**Supplementary Figure 11: Peripheral immune cells are activated mid-treatment cycle.** **A-B**, Geometric mean fluorescence intensity (GMFI) distribution of CD69 (**A**) and PD-1 (**B**) in all immune subtypes detected in patient blood across various treatment timepoints. Statistical significance tested with cumulative probit mixed-effects ordinal regressions. For all statistical comparisons, SGPVs were used to determine if there was significant evidence of a difference where the null interval was set at +/- 5% difference in regression estimates. *SGPV = 0; there were no SGPVs = 1.
