# Supplementary material for: A Phase II Trial of Guadecitabine plus Atezolizumab in Metastatic Urothelial Carcinoma Progressing after Initial Immune Checkpoint Inhibitor Therapy
Source: Oxford University Press journal article supplement (doi:10.1158/1078-0432.ccr-22-3642), 2023-03-16
Supplement: ccr-22-3642_figure_s12_suppfs12.docx [file ccr-22-3642_figure_s12_suppfs12.docx]

**
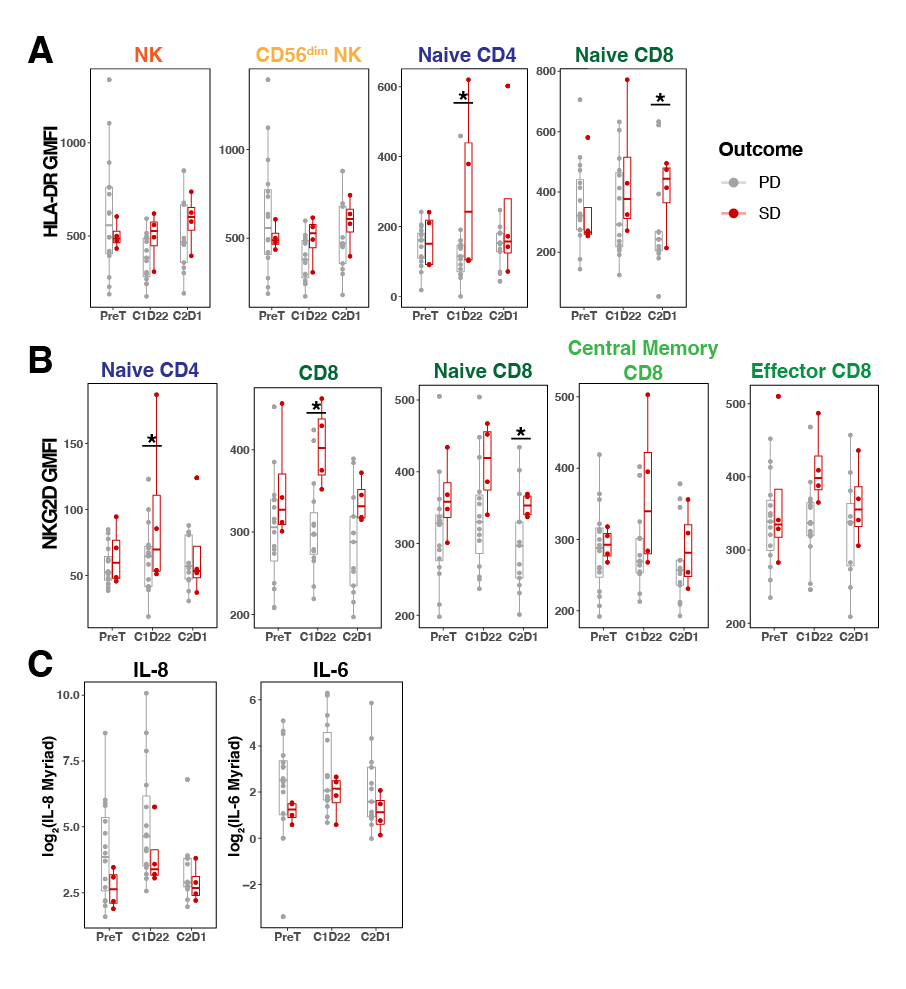
**

**Supplementary Figure 12: HLA-DR and NKG2D abundance on peripheral lymphocytes associate with longer progression free survival. A-B,** Geometric mean fluorescence intensity (GMFI) comparison of HLA-DR (**A**) or NKG2D (**B**) on particular immune subtypes from SD or PD patient blood across various treatment timepoints. **C.** Expression distribution of IL-8 and IL-6 cytokines detected in patient plasma by Myriad RBM platform. Statistical significance tested with cumulative probit mixed-effects ordinal regressions and SGPVs were used to determine if there was significant evidence of a difference where the null interval was set at +/- 5% difference in regression estimates. *SGPV = 0; there were no SGPVs = 1.
