# Supplementary material for: A Phase II Trial of Guadecitabine plus Atezolizumab in Metastatic Urothelial Carcinoma Progressing after Initial Immune Checkpoint Inhibitor Therapy
Source: Oxford University Press journal article supplement (doi:10.1158/1078-0432.ccr-22-3642), 2023-03-16
Supplement: ccr-22-3642_supplementary_tables_1_suppts1.xlsx [file ccr-22-3642_supplementary_tables_1_suppts1.xlsx]

## Sheet: Table S1 Trial information
Patient ID	Age at On Study	Gender	Race	Ethnicity	Study Site	Previously treated with immune checkpoint inhibitor therapy	If yes, what was the best response documented:	ECOG Performance Status	Histology	Primary Site	Metastatic Site	Biopsy Site	Date of First Dose	Off Treatment Date	Off Study Date	Date of PD	Best Response to Therapy	Time to Progression, death
GU-114-001	53	M	White	Non-Hispanic	Fox Chase Cancer Center at Cottman Ave	Pembrolizumab	Progressive Disease	1 - Restricted	Urothelial Carcinoma	Bladder	Lymph Nodes	Para-aortic lymph node	2018-01-22	2018-10-01	2019-09-17	2018-09-28	Stable Disease Confirmed	249
GU-114-002	65	M	White	Non-Hispanic	Fox Chase Cancer Center at Cottman Ave	Durvalumab + Tremelimumab	Stable Disease	0 - Fully active	Urothelial	Bladder	Lung and Periutereral Mass	Left lobe lung	2018-02-12	2018-07-30	ON FOLLOW UP	2018-07-26	Progressive disease	164
GU-114-003	75	M	White	Non-Hispanic	Fox Chase Cancer Center at Cottman Ave	Pembrolizumab	Partial Response	0 - Fully active	Urothelial Carcinoma	Bladder	multiple lymph nodes, left adrenal gland, bone	Left adrenal gland	2018-04-02	2018-06-25	2018-11-30	2018-06-21	Progressive Disease	80
GU-114-004	67	M	White	Non-Hispanic	Fox Chase Cancer Center at Cottman Ave	Pembro + Epacadostat	Partial Response	0 - Fully active	Urothelial Carcinoma	Bladder	Retropertioneal Lymph Nodes	Left retroperitoneal lymph node	2018-04-23	2019-03-26	2019-11-17	2019-06-13	Stable Disease Confirmed	416
GU-114-005	80	M	White	Non-Hispanic	Fox Chase Cancer Center at Cottman Ave	Atezolizumab	Stable Disease	0 - Fully active	Urothelial Carcinoma	Bladder	Lung	Left lower lung	2018-05-07	2018-06-21	2020-04-01	2018-06-28	Progressive Disease	52
GU-114-007	53	M	White	Non-Hispanic	Fox Chase Cancer Center at Cottman Ave	Pembro + Epacadostat	Partial Response	0 - Fully active	Urothelial Carcinoma	Bladder	Retropertioneal Lymph Nodes	Retroperitoneal lymph node	2018-06-18	2018-12-04	2019-12-10	2018-11-28	Progressive disease	163
GU-114-012	69	M	White	Non-Hispanic	Fox Chase Cancer Center at Cottman Ave	Atezolizumab	Progressive Disease	1 - Restricted	Urothelial carcinoma	Left renal pelvis	Liver	Liver (upper right lobe)	2018-11-12	2019-01-26	2019-01-26	2019-01-26	Progressive Disease	75
GU-114-013	82	M	Black or African American	Non-Hispanic	Fox Chase Cancer Center at Cottman Ave	Pembrolizumab	Stable Disease	2 - Ambulatory	Urothelial carcinoma	Bladder	Lymph Node	Left obturator lymph node	2019-02-25	2019-04-18	2019-04-26	2019-04-10	Progressive disease	44
GU-114-014	72	M	White	Non-Hispanic	Sidney Kimmel Comprehensive Cancer Center	Pembrolizumab	Progressive Disease	1 - Restricted	Urothelial (transitional cell) carcinoma	Bladder, NOS; Prostatic urethra with prostatic stromal involvement	Iliac lymph nodes	Primary	2019-01-28	2020-01-07	ON FOLLOW UP	2022-02-18	Stable Disease Confirmed	365
GU-114-016	53	F	Black or African American	Non-Hispanic	Fox Chase Cancer Center at Cottman Ave	Pembrolizumab	Progressive Disease	0 - Fully active	Urothelial Carcinoma	Bladder	Lung, Liver	Liver	2019-04-01	2019-06-13	2019-06-13	2019-06-13	Progressive Disease	73
GU-114-017	73	M	White	Non-Hispanic	Norris Comprehensive Cancer Center	Pembrolizumab	Progressive Disease	0 - Fully active	Metastatic carcinoma consistent with urothelial primary	Bladder	Lung, Liver	Lung	2019-05-20	2019-07-15	2019-08-26	2019-07-12	Progressive Disease	53
GU-114-018	57	M	White	Non-Hispanic	Fox Chase Cancer Center at Cottman Ave	Pembrolizumab	Stable Disease	1 - Restricted	urothelial carcinoma	Bladder	Lung	Left psoas muscle	2019-07-22	2019-10-03	2019-10-30	2019-10-03	Progressive Disease	73
GU-114-019	65	M	White	Non-Hispanic	Fox Chase Cancer Center at Cottman Ave	Pembrolizumab	Progressive Disease	0 - Fully active	urothelial carcinoma	Bladder	lungs, liver, lymph nodes	Liver (right lobe)	2019-07-15	2019-08-23	2019-09-18	2019-08-20	Progressive Disease	36
GU-114-020	45	M	White	Non-Hispanic	Sidney Kimmel Comprehensive Cancer Center	Pembrolizumab	Partial Response	0 - Fully active	Papillary urothelial (transitional cell) carcinoma	Bladder	Lymph Nodes	Primary	2019-07-08	2019-09-24	N/A	2019-09-24	Progressive disease	78
GU-114-021	76	M	White	Non-Hispanic	Sidney Kimmel Comprehensive Cancer Center	Pembrolizumab	Partial Response	0 - Fully active	Micropapillary	Bladder	Lymph node	Primary	2019-07-29	2019-10-11	2019-10-24	2019-10-11	Progressive disease	74
GU-114-023	54	M	White	Non-Hispanic	Fox Chase Cancer Center at Cottman Ave	Pembrolizumab + Placebo	Partial Response	0 - Fully active	Papillary	Bladder	Lung, bone, right ureter, liver	Liver (midline right)	2019-08-12	2019-09-23	2019-11-30	2019-09-23	Progressive Disease	42
GU-114-024	55	F	White	Non-Hispanic	Sidney Kimmel Comprehensive Cancer Center	Pembrolizumab	Progressive Disease	0 - Fully active	Urothelial carcinoma with necrosis	Bladder	Liver	Primary	2019-08-12	2019-11-19	2019-12-06	2019-11-19	Progressive disease	99
GU-114-025	74	M	White	Non-Hispanic	Fox Chase Cancer Center at Cottman Ave	Pembrolizumab	Progressive Disease	0 - Fully active	papillary UC with glandular diff	Bladder	Lung	Right upper lobe lung	2019-08-26	2019-11-18	2020-01-22	2019-11-15	Progressive disease	81
GU-114-027	53	F	White	Non-Hispanic	Fox Chase Cancer Center at Cottman Ave	Pembrolizumab	Progressive Disease	0 - Fully active	Papillary Urothelial Carcinoma	Bladder	Lung	Left external iliac lymph node	2019-09-30	2019-10-15	2019-10-29	2019-10-29	Progressive disease	29
GU-114-028	59	M	White	Non-Hispanic	Norris Comprehensive Cancer Center	Atezolizumab	Stable Disease	0 - Fully active	Metastatic poorly differentiated carcinoma consistent with urothelial carcinoma	Bladder	Retroperitoneum lymph nodes	Primary	2019-08-28	ON TREATMENT	ON TREATMENT		Stable Disease Confirmed	510
GU-114-031	65	M	White	Non-Hispanic	Sidney Kimmel Comprehensive Cancer Center	Atezolizumab	Progressive Disease	0 - Fully active	Papillary urothelial carcinoma	Bladder	Liver	Primary	2019-10-02	2020-03-31	2020-03-31	2020-03-31	Progressive disease	181

## Sheet: Table S2 Tumor mutation burden
Patient ID (GU-114-#)	Timepoint	Tumor_Mutational_Burden	PFS
27	Pre	1482	29
19	Pre	1832	36
16	Pre	2676	73
12	Pre	2164	75
21	Pre	1984	74
21	Post	1927	74
18	Pre	2045	73
23	Pre	2019	42
24	Pre	1757	99
24	Post	1955	99
25	Pre	1666	81
2	Pre	3252	164
2	Post	2965	164
3	Pre	2888	80
3	Post	3134	80
7	Pre	3461	163
7	Post	2703	163
20	Pre	2175	78
28	Pre	1918	510
28	Post	1943	510
4	Pre	3409	416
4	Post	3369	416
1	Pre	3235	249
1	Post	3379	249
14	Pre	2453	365
14	Post	3274	365
14	EoT	2894	365
31	Pre	1897	181
31	Post	2612	181

## Sheet: Table S3 Unfiltered WES results
Patient_ID	Chromosome	Start_Position	End_Position	Reference_Allele	Tumor_Seq_Allele2	Hugo_Symbol	Variant_Classification	tx	exon	txChange	aaChange	Variant_Type	Func.refGene	Gene.refGene	GeneDetail.refGene	ExonicFunc.refGene	AAChange.refGene	DP	#CHROM	POS	REF	ALT	PON_INFO	FORMAT	GENOTYPE	Reference_Reads	Alternate_Reads	Alternate_Allele_Frequency	READ DEPTH
Pre-Subject 1	chr1	943360	943360	T	G	SAMD11	Missense_Mutation	NM_152486	exon12	c.T1672G	p.C558G	SNP	exonic	SAMD11	.	nonsynonymous SNV	SAMD11:NM_152486:exon12:c.T1672G:p.C558G	31	chr1	943360	T	G	AS_SB_TABLE=16,13|0,2;DP=31;ECNT=4;MBQ=36,14;MFRL=204,245;MMQ=60,60;MPOS=18;POPAF=7.30;TLOD=7.03	GT:AD:AF:DP:F1R2:F2R1:PGT:PID:PS:SB	0|1	29	2	0.151	31
Pre-Subject 1	chr1	943362	943362	T	G	SAMD11	Missense_Mutation	NM_152486	exon12	c.T1674G	p.C558W	SNP	exonic	SAMD11	.	nonsynonymous SNV	SAMD11:NM_152486:exon12:c.T1674G:p.C558W	31	chr1	943362	T	G	AS_SB_TABLE=16,13|0,2;DP=31;ECNT=4;MBQ=36,14;MFRL=204,245;MMQ=60,60;MPOS=20;POPAF=7.30;TLOD=7.03	GT:AD:AF:DP:F1R2:F2R1:PGT:PID:PS:SB	0|1	29	2	0.151	31
Pre-Subject 1	chr1	943374	943374	T	G	SAMD11	Silent	NM_152486	exon12	c.T1686G	p.T562T	SNP	exonic	SAMD11	.	synonymous SNV	SAMD11:NM_152486:exon12:c.T1686G:p.T562T	29	chr1	943374	T	G	AS_SB_TABLE=12,11|0,6;DP=29;ECNT=4;MBQ=36,14;MFRL=183,193;MMQ=60,60;MPOS=17;POPAF=7.30;TLOD=7.34	GT:AD:AF:DP:F1R2:F2R1:PGT:PID:PS:SB	0|1	23	6	0.172	29
Pre-Subject 1	chr1	962041	962041	G	A	KLHL17	Silent	NM_198317	exon4	c.G705A	p.L235L	SNP	exonic	KLHL17	.	synonymous SNV	KLHL17:NM_198317:exon4:c.G705A:p.L235L	44	chr1	962041	G	A	AS_SB_TABLE=6,34|0,4;DP=48;ECNT=7;MBQ=36,36;MFRL=218,217;MMQ=60,60;MPOS=20;POPAF=7.30;TLOD=9.57	GT:AD:AF:DP:F1R2:F2R1:SB	0/1	40	4	0.111	44
Pre-Subject 1	chr1	980098	980098	C	G	PERM1	Missense_Mutation	NM_001369898	exon1	c.G932C	p.R311T	SNP	exonic	PERM1	.	nonsynonymous SNV	PERM1:NM_001369898:exon1:c.G932C:p.R311T,PERM1:NM_001291366:exon2:c.G932C:p.R311T,PERM1:NM_001369897:exon2:c.G932C:p.R311T,PERM1:NM_001291367:exon3:c.G590C:p.R197T	38	chr1	980098	C	G	AS_SB_TABLE=23,11|0,4;DP=38;ECNT=1;MBQ=36,23;MFRL=233,160;MMQ=60,59;MPOS=5;POPAF=7.30;TLOD=3.73	GT:AD:AF:DP:F1R2:F2R1:SB	0/1	34	4	0.1	38
Pre-Subject 1	chr1	1043382	1043382	G	A	AGRN	Missense_Mutation	NM_198576	exon8	c.G1528A	p.G510S	SNP	exonic	AGRN	.	nonsynonymous SNV	AGRN:NM_198576:exon8:c.G1528A:p.G510S	113	chr1	1043382	G	A	AS_SB_TABLE=33,26|22,32;DP=120;ECNT=1;MBQ=36,36;MFRL=184,166;MMQ=60,60;MPOS=20;POPAF=2.00;TLOD=168.35	GT:AD:AF:DP:F1R2:F2R1:SB	0/1	59	54	0.469	113
Pre-Subject 1	chr1	1286881	1286881	T	G	SCNN1D	Missense_Mutation	NM_001130413	exon8	c.T1025G	p.V342G	SNP	exonic	SCNN1D	.	nonsynonymous SNV	SCNN1D:NM_001130413:exon8:c.T1025G:p.V342G	44	chr1	1286881	T	G	AS_SB_TABLE=12,23|7,2;DP=52;ECNT=3;MBQ=32,14;MFRL=190,160;MMQ=60,60;MPOS=13;POPAF=7.30;TLOD=6.43	GT:AD:AF:DP:F1R2:F2R1:SB	0/1	35	9	0.189	44
Pre-Subject 1	chr1	1286890	1286890	A	C	SCNN1D	Missense_Mutation	NM_001130413	exon8	c.A1034C	p.H345P	SNP	exonic	SCNN1D	.	nonsynonymous SNV	SCNN1D:NM_001130413:exon8:c.A1034C:p.H345P	48	chr1	1286890	A	C	AS_SB_TABLE=14,26|8,0;DP=52;ECNT=3;MBQ=36,14;MFRL=191,185;MMQ=60,60;MPOS=21;POPAF=7.30;TLOD=6.57	GT:AD:AF:DP:F1R2:F2R1:PGT:PID:PS:SB	0|1	40	8	0.159	48
Pre-Subject 1	chr1	1286893	1286893	A	C	SCNN1D	Missense_Mutation	NM_001130413	exon8	c.A1037C	p.E346A	SNP	exonic	SCNN1D	.	nonsynonymous SNV	SCNN1D:NM_001130413:exon8:c.A1037C:p.E346A	48	chr1	1286893	A	C	AS_SB_TABLE=14,26|8,0;DP=51;ECNT=3;MBQ=36,14;MFRL=191,185;MMQ=60,60;MPOS=20;POPAF=7.30;TLOD=6.85	GT:AD:AF:DP:F1R2:F2R1:PGT:PID:PS:SB	0|1	40	8	0.159	48
Pre-Subject 1	chr1	1331358	1331358	G	A	TAS1R3	Missense_Mutation	NM_152228	exon1	c.G13A	p.A5T	SNP	exonic	TAS1R3	.	nonsynonymous SNV	TAS1R3:NM_152228:exon1:c.G13A:p.A5T	106	chr1	1331358	G	A	AS_SB_TABLE=36,10|44,16;DP=108;ECNT=2;MBQ=36,36;MFRL=205,231;MMQ=60,60;MPOS=21;PON;POPAF=1.26;TLOD=236.72	GT:AD:AF:DP:F1R2:F2R1:PGT:PID:PS:SB	0|1	46	60	0.561	106
Pre-Subject 1	chr1	1331360	1331360	T	A	TAS1R3	Silent	NM_152228	exon1	c.T15A	p.A5A	SNP	exonic	TAS1R3	.	synonymous SNV	TAS1R3:NM_152228:exon1:c.T15A:p.A5A	106	chr1	1331360	T	A	AS_SB_TABLE=36,10|44,16;DP=108;ECNT=2;MBQ=36,36;MFRL=205,231;MMQ=60,60;MPOS=20;PON;POPAF=1.26;TLOD=236.72	GT:AD:AF:DP:F1R2:F2R1:PGT:PID:PS:SB	0|1	46	60	0.561	106
Pre-Subject 1	chr1	1495794	1495794	C	T	ATAD3B	Missense_Mutation	NM_001317238	exon14	c.C1786T	p.P596S	SNP	exonic	ATAD3B	.	nonsynonymous SNV	ATAD3B:NM_001317238:exon14:c.C1786T:p.P596S,ATAD3B:NM_031921:exon16:c.C1924T:p.P642S	143	chr1	1495794	C	T	AS_SB_TABLE=76,48|12,7;DP=148;ECNT=1;MBQ=36,36;MFRL=190,153;MMQ=59,57;MPOS=17;POPAF=3.76;TLOD=43.35	GT:AD:AF:DP:F1R2:F2R1:SB	0/1	124	19	0.136	143
Pre-Subject 1	chr1	1623783	1623783	A	C	MIB2	Missense_Mutation	NM_001170686	exon4	c.A431C	p.H144P	SNP	exonic	MIB2	.	nonsynonymous SNV	MIB2:NM_001170686:exon4:c.A431C:p.H144P,MIB2:NM_001170687:exon4:c.A389C:p.H130P,MIB2:NM_001170688:exon4:c.A602C:p.H201P,MIB2:NM_001170689:exon4:c.A257C:p.H86P,MIB2:NM_080875:exon4:c.A431C:p.H144P	32	chr1	1623783	A	C	AS_SB_TABLE=12,16|4,0;DP=32;ECNT=4;MBQ=36,14;MFRL=169,213;MMQ=60,60;MPOS=22;POPAF=7.30;TLOD=5.49	GT:AD:AF:DP:F1R2:F2R1:SB	0/1	28	4	0.131	32
Pre-Subject 1	chr1	1668365	1668365	C	T	SLC35E2B	Silent	NM_001110781	exon8	c.G942A	p.A314A	SNP	exonic	SLC35E2B	.	synonymous SNV	SLC35E2B:NM_001110781:exon8:c.G942A:p.A314A,SLC35E2B:NM_001290264:exon9:c.G942A:p.A314A	33	chr1	1668365	C	T	AS_SB_TABLE=20,1|8,4;DP=33;ECNT=2;MBQ=36,36;MFRL=188,240;MMQ=27,40;MPOS=23;POPAF=2.09;TLOD=34.34	GT:AD:AF:DP:F1R2:F2R1:PGT:PID:PS:SB	0|1	21	12	0.373	33
Pre-Subject 1	chr1	1668373	1668373	C	T	SLC35E2B	Missense_Mutation	NM_001110781	exon8	c.G934A	p.V312I	SNP	exonic	SLC35E2B	.	nonsynonymous SNV	SLC35E2B:NM_001110781:exon8:c.G934A:p.V312I,SLC35E2B:NM_001290264:exon9:c.G934A:p.V312I	34	chr1	1668373	C	T	AS_SB_TABLE=19,1|11,3;DP=34;ECNT=2;MBQ=36,36;MFRL=197,269;MMQ=27,40;MPOS=21;PON;POPAF=0.244;TLOD=49.75	GT:AD:AF:DP:F1R2:F2R1:PGT:PID:PS:SB	0|1	20	14	0.417	34
Pre-Subject 1	chr1	1734728	1734728	C	T	SLC35E2A	Missense_Mutation	NM_182838	exon5	c.G694A	p.V232I	SNP	exonic	SLC35E2A	.	nonsynonymous SNV	SLC35E2A:NM_182838:exon5:c.G694A:p.V232I,SLC35E2A:NM_001199787:exon6:c.G694A:p.V232I	30	chr1	1734728	C	T	AS_SB_TABLE=23,3|4,0;DP=31;ECNT=2;MBQ=36,36;MFRL=227,157;MMQ=27,27;MPOS=20;POPAF=2.98;TLOD=12.06	GT:AD:AF:DP:F1R2:F2R1:PGT:PID:PS:SB	0|1	26	4	0.156	30
Pre-Subject 1	chr1	1734736	1734736	C	T	SLC35E2A	Missense_Mutation	NM_182838	exon5	c.G686A	p.R229H	SNP	exonic	SLC35E2A	.	nonsynonymous SNV	SLC35E2A:NM_182838:exon5:c.G686A:p.R229H,SLC35E2A:NM_001199787:exon6:c.G686A:p.R229H	31	chr1	1734736	C	T	AS_SB_TABLE=23,4|4,0;DP=33;ECNT=2;MBQ=36,34;MFRL=233,157;MMQ=27,27;MPOS=25;PON;POPAF=1.03;TLOD=11.98	GT:AD:AF:DP:F1R2:F2R1:PGT:PID:PS:SB	0|1	27	4	0.151	31
Pre-Subject 1	chr1	1752908	1752908	-	CCT	NADK	In_Frame_Ins	NM_001198995	exon10	c.1240_1241insAGG	p.E413_G414insE	INS	exonic	NADK	.	nonframeshift insertion	NADK:NM_001198995:exon10:c.1240_1241insAGG:p.E413_G414insE,NADK:NM_001198993:exon12:c.1336_1337insAGG:p.E445_G446insE,NADK:NM_001353641:exon12:c.1336_1337insAGG:p.E445_G446insE,NADK:NM_001353642:exon12:c.1075_1076insAGG:p.E358_G359insE,NADK:NM_023018:exon12:c.1336_1337insAGG:p.E445_G446insE,NADK:NM_001198994:exon14:c.1771_1772insAGG:p.E590_G591insE	38	chr1	1752908	C	CCCT	AS_SB_TABLE=2,0|22,14;DP=67;ECNT=1;MBQ=36,36;MFRL=188,193;MMQ=60,60;MPOS=26;PON;POPAF=3.61;RPA=9,10;RU=CCT;STR;TLOD=141.07	GT:AD:AF:DP:F1R2:F2R1:SB	0/1	2	36	0.928	38
Pre-Subject 1	chr1	2185493	2185493	T	G	FAAP20	Missense_Mutation	NM_001256945	exon3	c.A355C	p.T119P	SNP	exonic	FAAP20	.	nonsynonymous SNV	FAAP20:NM_001256945:exon3:c.A355C:p.T119P,FAAP20:NM_001282673:exon4:c.A491C:p.H164P,FAAP20:NM_001282672:exon7:c.A229C:p.T77P,FAAP20:NM_001146310:exon8:c.A478C:p.T160P,FAAP20:NM_001282671:exon8:c.A229C:p.T77P	26	chr1	2185493	T	G	AS_SB_TABLE=0,14|0,12;DP=32;ECNT=1;MBQ=23,14;MFRL=253,202;MMQ=60,60;MPOS=25;POPAF=7.30;TLOD=11.32	GT:AD:AF:DP:F1R2:F2R1:SB	0/1	14	12	0.441	26
Pre-Subject 1	chr1	3186253	3186253	A	C	PRDM16	Missense_Mutation	NM_022114	exon2	c.A166C	p.T56P	SNP	exonic	PRDM16	.	nonsynonymous SNV	PRDM16:NM_022114:exon2:c.A166C:p.T56P,PRDM16:NM_199454:exon2:c.A166C:p.T56P	76	chr1	3186253	A	C	AS_SB_TABLE=39,21|16,0;DP=80;ECNT=1;MBQ=32,14;MFRL=194,199;MMQ=60,60;MPOS=21;POPAF=7.30;TLOD=7.74	GT:AD:AF:DP:F1R2:F2R1:SB	0/1	60	16	0.171	76
Pre-Subject 1	chr1	6112143	6112143	T	-	CHD5	Frame_Shift_Del	NM_015557	exon35	c.5137delA	p.T1713Rfs*37	SNP	exonic	CHD5	.	frameshift deletion	CHD5:NM_015557:exon35:c.5137delA:p.T1713Rfs*37	21	chr1	6112142	GT	G	AS_SB_TABLE=13,4|4,0;DP=24;ECNT=3;MBQ=36,14;MFRL=193,197;MMQ=60,60;MPOS=9;POPAF=7.30;TLOD=4.84	GT:AD:AF:DP:F1R2:F2R1:PGT:PID:PS:SB	0|1	17	4	0.2	21
Pre-Subject 1	chr1	6112145	6112145	A	C	CHD5	Missense_Mutation	NM_015557	exon35	c.T5135G	p.F1712C	SNP	exonic	CHD5	.	nonsynonymous SNV	CHD5:NM_015557:exon35:c.T5135G:p.F1712C	22	chr1	6112145	A	C	AS_SB_TABLE=14,4|4,0;DP=22;ECNT=3;MBQ=36,14;MFRL=196,197;MMQ=60,60;MPOS=7;POPAF=7.30;TLOD=3.61	GT:AD:AF:DP:F1R2:F2R1:PGT:PID:PS:SB	0|1	18	4	0.18	22
Pre-Subject 1	chr1	6555516	6555516	C	G	TAS1R1	Missense_Mutation	NM_138697	exon1	c.C143G	p.S48C	SNP	exonic	TAS1R1	.	nonsynonymous SNV	TAS1R1:NM_138697:exon1:c.C143G:p.S48C,TAS1R1:NM_177540:exon1:c.C143G:p.S48C	33	chr1	6555516	C	G	AS_SB_TABLE=18,13|1,1;DP=34;ECNT=1;MBQ=36,36;MFRL=174,231;MMQ=60,60;MPOS=19;POPAF=7.30;TLOD=3.98	GT:AD:AF:DP:F1R2:F2R1:SB	0/1	31	2	0.091	33
Pre-Subject 1	chr1	6574947	6574947	T	G	TAS1R1	Missense_Mutation	NM_138697	exon3	c.T815G	p.V272G	SNP	exonic	TAS1R1	.	nonsynonymous SNV	TAS1R1:NM_138697:exon3:c.T815G:p.V272G	26	chr1	6574947	T	G	AS_SB_TABLE=2,20|3,1;DP=28;ECNT=1;MBQ=32,21;MFRL=223,178;MMQ=60,60;MPOS=14;POPAF=7.30;TLOD=4.40	GT:AD:AF:DP:F1R2:F2R1:SB	0/1	22	4	0.15	26
Pre-Subject 1	chr1	6644575	6644575	A	G	DNAJC11	Silent	NM_018198	exon10	c.T1080C	p.G360G	SNP	exonic	DNAJC11	.	synonymous SNV	DNAJC11:NM_018198:exon10:c.T1080C:p.G360G	46	chr1	6644575	A	G	AS_SB_TABLE=16,9|11,10;DP=47;ECNT=2;MBQ=36,36;MFRL=178,174;MMQ=60,60;MPOS=20;PON;POPAF=0.055;TLOD=65.65	GT:AD:AF:DP:F1R2:F2R1:SB	0/1	25	21	0.466	46
Pre-Subject 1	chr1	6644604	6644604	C	T	DNAJC11	Missense_Mutation	NM_018198	exon10	c.G1051A	p.A351T	SNP	exonic	DNAJC11	.	nonsynonymous SNV	DNAJC11:NM_018198:exon10:c.G1051A:p.A351T	46	chr1	6644604	C	T	AS_SB_TABLE=20,24|1,1;DP=47;ECNT=2;MBQ=36,36;MFRL=193,184;MMQ=60,60;MPOS=21;POPAF=7.30;TLOD=3.55	GT:AD:AF:DP:F1R2:F2R1:SB	0/1	44	2	0.066	46
Pre-Subject 1	chr1	7664384	7664384	T	G	CAMTA1	Missense_Mutation	NM_001349608	exon8	c.T1747G	p.S583A	SNP	exonic	CAMTA1	.	nonsynonymous SNV	CAMTA1:NM_001349608:exon8:c.T1747G:p.S583A,CAMTA1:NM_001349612:exon8:c.T1747G:p.S583A,CAMTA1:NM_001349609:exon9:c.T1837G:p.S613A,CAMTA1:NM_001349610:exon9:c.T1837G:p.S613A,CAMTA1:NM_015215:exon9:c.T1837G:p.S613A	37	chr1	7664384	T	G	AS_SB_TABLE=10,21|6,0;DP=38;ECNT=2;MBQ=36,14;MFRL=190,190;MMQ=60,60;MPOS=22;POPAF=7.30;TLOD=11.35	GT:AD:AF:DP:F1R2:F2R1:SB	0/1	31	6	0.167	37
Pre-Subject 1	chr1	8330435	8330435	A	G	SLC45A1	Silent	NM_001080397	exon5	c.A1044G	p.P348P	SNP	exonic	SLC45A1	.	synonymous SNV	SLC45A1:NM_001080397:exon5:c.A1044G:p.P348P	15	chr1	8330435	A	G	AS_SB_TABLE=0,0|8,7;DP=17;ECNT=1;MBQ=0,36;MFRL=0,201;MMQ=60,60;MPOS=17;PON;POPAF=0.111;TLOD=52.01	GT:AD:AF:DP:F1R2:F2R1:SB	0/1	0	15	0.943	15
Pre-Subject 1	chr1	8330705	8330705	C	T	SLC45A1	Silent	NM_001080397	exon5	c.C1314T	p.F438F	SNP	exonic	SLC45A1	.	synonymous SNV	SLC45A1:NM_001080397:exon5:c.C1314T:p.F438F	39	chr1	8330705	C	T	AS_SB_TABLE=19,18|1,1;DP=41;ECNT=1;MBQ=36,36;MFRL=193,145;MMQ=60,60;MPOS=26;POPAF=7.30;TLOD=3.69	GT:AD:AF:DP:F1R2:F2R1:SB	0/1	37	2	0.077	39
Pre-Subject 1	chr1	8358463	8358463	T	G	RERE	Missense_Mutation	NM_001042682	exon10	c.A2410C	p.T804P	SNP	exonic	RERE	.	nonsynonymous SNV	RERE:NM_001042682:exon10:c.A2410C:p.T804P,RERE:NM_001042681:exon20:c.A4072C:p.T1358P,RERE:NM_012102:exon21:c.A4072C:p.T1358P	47	chr1	8358463	T	G	AS_SB_TABLE=21,16|0,10;DP=50;ECNT=1;MBQ=32,14;MFRL=198,199;MMQ=60,60;MPOS=20;POPAF=7.30;TLOD=3.36	GT:AD:AF:DP:F1R2:F2R1:SB	0/1	37	10	0.162	47
Pre-Subject 1	chr1	8361032	8361032	C	T	RERE	Silent	NM_001042682	exon8	c.G813A	p.P271P	SNP	exonic	RERE	.	synonymous SNV	RERE:NM_001042682:exon8:c.G813A:p.P271P,RERE:NM_001042681:exon18:c.G2475A:p.P825P,RERE:NM_012102:exon19:c.G2475A:p.P825P	21	chr1	8361032	C	T	AS_SB_TABLE=6,3|5,7;DP=22;ECNT=1;MBQ=36,27;MFRL=196,157;MMQ=60,60;MPOS=24;PON;POPAF=0.381;TLOD=27.46	GT:AD:AF:DP:F1R2:F2R1:SB	0/1	9	12	0.545	21
Pre-Subject 1	chr1	8361143	8361143	T	C	RERE	Silent	NM_001042682	exon8	c.A702G	p.P234P	SNP	exonic	RERE	.	synonymous SNV	RERE:NM_001042682:exon8:c.A702G:p.P234P,RERE:NM_001042681:exon18:c.A2364G:p.P788P,RERE:NM_012102:exon19:c.A2364G:p.P788P	26	chr1	8361143	T	C	AS_SB_TABLE=6,6|11,3;DP=27;ECNT=1;MBQ=36,36;MFRL=212,226;MMQ=60,60;MPOS=20;PON;POPAF=0.151;TLOD=44.24	GT:AD:AF:DP:F1R2:F2R1:SB	0/1	12	14	0.533	26
Pre-Subject 1	chr1	9720197	9720197	G	A	PIK3CD	Silent	NM_001350235	exon10	c.G1338A	p.L446L	SNP	exonic	PIK3CD	.	synonymous SNV	PIK3CD:NM_001350235:exon10:c.G1338A:p.L446L,PIK3CD:NM_001350234:exon11:c.G1425A:p.L475L,PIK3CD:NM_005026:exon11:c.G1425A:p.L475L	33	chr1	9720197	G	A	AS_SB_TABLE=5,26|1,1;DP=34;ECNT=1;MBQ=36,36;MFRL=219,314;MMQ=60,60;MPOS=19;POPAF=7.30;TLOD=3.89	GT:AD:AF:DP:F1R2:F2R1:SB	0/1	31	2	0.085	33
Pre-Subject 1	chr1	10472347	10472349	AGG	-	DFFA	In_Frame_Del	NM_004401	exon1	c.110_112del	p.S37del	DEL	exonic	DFFA	.	nonframeshift deletion	DFFA:NM_004401:exon1:c.110_112del:p.S37del,DFFA:NM_213566:exon1:c.110_112del:p.S37del	53	chr1	10472346	CAGG	C	AS_SB_TABLE=21,8|18,6;DP=59;ECNT=1;MBQ=36,36;MFRL=192,168;MMQ=60,60;MPOS=25;POPAF=3.19;RPA=2,1;RU=AGG;STR;TLOD=88.18	GT:AD:AF:DP:F1R2:F2R1:SB	0/1	29	24	0.446	53
Pre-Subject 1	chr1	10639084	10639089	TCGTCG	-	CASZ1	In_Frame_Del	NM_001079843	exon21	c.5133_5138del	p.D1711_D1712del	DEL	exonic	CASZ1	.	nonframeshift deletion	CASZ1:NM_001079843:exon21:c.5133_5138del:p.D1711_D1712del	21	chr1	10639083	CTCGTCG	C	AS_SB_TABLE=13,4|4,0;DP=24;ECNT=1;MBQ=36,36;MFRL=163,156;MMQ=60,60;MPOS=20;POPAF=4.28;RPA=4,2;RU=TCG;STR;TLOD=11.38	GT:AD:AF:DP:F1R2:F2R1:SB	0/1	17	4	0.237	21
Pre-Subject 1	chr1	10653662	10653662	T	G	CASZ1	Missense_Mutation	NM_001079843	exon11	c.A2395C	p.T799P	SNP	exonic	CASZ1	.	nonsynonymous SNV	CASZ1:NM_001079843:exon11:c.A2395C:p.T799P,CASZ1:NM_017766:exon11:c.A2395C:p.T799P	72	chr1	10653662	T	G	AS_SB_TABLE=43,17|0,12;DP=73;ECNT=1;MBQ=36,14;MFRL=184,185;MMQ=60,60;MPOS=18;POPAF=7.30;TLOD=9.48	GT:AD:AF:DP:F1R2:F2R1:SB	0/1	60	12	0.122	72
Pre-Subject 1	chr1	12138343	12138343	C	T	TNFRSF8	Missense_Mutation	NM_001281430	exon13	c.C1114T	p.P372S	SNP	exonic	TNFRSF8	.	nonsynonymous SNV	TNFRSF8:NM_001281430:exon13:c.C1114T:p.P372S,TNFRSF8:NM_001243:exon14:c.C1450T:p.P484S	41	chr1	12138343	C	T	AS_SB_TABLE=19,20|1,1;DP=44;ECNT=1;MBQ=36,36;MFRL=194,203;MMQ=60,60;MPOS=21;POPAF=7.30;TLOD=3.67	GT:AD:AF:DP:F1R2:F2R1:SB	0/1	39	2	0.073	41
Pre-Subject 1	chr1	12777090	12777090	T	C	PRAMEF12	Missense_Mutation	NM_001080830	exon3	c.T943C	p.C315R	SNP	exonic	PRAMEF12	.	nonsynonymous SNV	PRAMEF12:NM_001080830:exon3:c.T943C:p.C315R	35	chr1	12777090	T	C	AS_SB_TABLE=23,10|2,0;DP=35;ECNT=5;MBQ=36,36;MFRL=211,230;MMQ=60,32;MPOS=19;POPAF=3.16;TLOD=4.65	GT:AD:AF:DP:F1R2:F2R1:PGT:PID:PS:SB	0|1	33	2	0.08	35
Pre-Subject 1	chr1	12777095	12777095	G	A	PRAMEF12	Silent	NM_001080830	exon3	c.G948A	p.P316P	SNP	exonic	PRAMEF12	.	synonymous SNV	PRAMEF12:NM_001080830:exon3:c.G948A:p.P316P	38	chr1	12777095	G	A	AS_SB_TABLE=25,11|2,0;DP=38;ECNT=5;MBQ=36,36;MFRL=212,230;MMQ=60,32;MPOS=24;POPAF=3.19;TLOD=4.55	GT:AD:AF:DP:F1R2:F2R1:PGT:PID:PS:SB	0|1	36	2	0.074	38
Pre-Subject 1	chr1	12777108	12777108	C	T	PRAMEF12	Silent	NM_001080830	exon3	c.C961T	p.L321L	SNP	exonic	PRAMEF12	.	synonymous SNV	PRAMEF12:NM_001080830:exon3:c.C961T:p.L321L	45	chr1	12777108	C	T	AS_SB_TABLE=27,16|2,0;DP=45;ECNT=5;MBQ=36,36;MFRL=211,230;MMQ=60,32;MPOS=34;POPAF=3.13;TLOD=4.31	GT:AD:AF:DP:F1R2:F2R1:PGT:PID:PS:SB	0|1	43	2	0.062	45
Pre-Subject 1	chr1	12777113	12777113	A	G	PRAMEF12	Silent	NM_001080830	exon3	c.A966G	p.K322K	SNP	exonic	PRAMEF12	.	synonymous SNV	PRAMEF12:NM_001080830:exon3:c.A966G:p.K322K	45	chr1	12777113	A	G	AS_SB_TABLE=25,18|2,0;DP=45;ECNT=5;MBQ=36,36;MFRL=206,230;MMQ=60,32;MPOS=33;POPAF=3.13;TLOD=4.34	GT:AD:AF:DP:F1R2:F2R1:PGT:PID:PS:SB	0|1	43	2	0.064	45
Pre-Subject 1	chr1	12777119	12777119	A	G	PRAMEF12	Silent	NM_001080830	exon3	c.A972G	p.L324L	SNP	exonic	PRAMEF12	.	synonymous SNV	PRAMEF12:NM_001080830:exon3:c.A972G:p.L324L	45	chr1	12777119	A	G	AS_SB_TABLE=25,18|2,0;DP=47;ECNT=5;MBQ=36,36;MFRL=211,230;MMQ=60,32;MPOS=27;POPAF=2.72;TLOD=4.34	GT:AD:AF:DP:F1R2:F2R1:PGT:PID:PS:SB	0|1	43	2	0.064	45
Pre-Subject 1	chr1	12794171	12794171	-	GCG	PRAMEF1	In_Frame_Ins	NM_023013	exon3	c.544_545insGCG	p.C182_S183insG	INS	exonic	PRAMEF1	.	nonframeshift insertion	PRAMEF1:NM_023013:exon3:c.544_545insGCG:p.C182_S183insG	36	chr1	12794171	T	TGCG	AS_SB_TABLE=24,8|4,0;DP=36;ECNT=7;MBQ=36,36;MFRL=215,188;MMQ=38,24;MPOS=15;POPAF=1.72;TLOD=4.23	GT:AD:AF:DP:F1R2:F2R1:SB	0/1	32	4	0.126	36
Pre-Subject 1	chr1	12794177	12794179	AAG	-	PRAMEF1	In_Frame_Del	NM_023013	exon3	c.550_552del	p.K184del	DEL	exonic	PRAMEF1	.	nonframeshift deletion	PRAMEF1:NM_023013:exon3:c.550_552del:p.K184del	45	chr1	12794176	TAAG	T	AS_SB_TABLE=31,10|4,0;DP=45;ECNT=7;MBQ=36,36;MFRL=208,188;MMQ=40,24;MPOS=16;POPAF=1.72;TLOD=11.21	GT:AD:AF:DP:F1R2:F2R1:PGT:PID:PS:SB	0|1	41	4	0.108	45
Pre-Subject 1	chr1	12794180	12794180	C	T	PRAMEF1	Silent	NM_023013	exon3	c.C553T	p.L185L	SNP	exonic	PRAMEF1	.	synonymous SNV	PRAMEF1:NM_023013:exon3:c.C553T:p.L185L	45	chr1	12794180	C	T	AS_SB_TABLE=31,10|4,0;DP=45;ECNT=7;MBQ=36,36;MFRL=201,188;MMQ=40,24;MPOS=17;POPAF=1.68;TLOD=11.21	GT:AD:AF:DP:F1R2:F2R1:PGT:PID:PS:SB	0|1	41	4	0.108	45
Pre-Subject 1	chr1	12794185	12794185	C	G	PRAMEF1	Silent	NM_023013	exon3	c.C558G	p.V186V	SNP	exonic	PRAMEF1	.	synonymous SNV	PRAMEF1:NM_023013:exon3:c.C558G:p.V186V	49	chr1	12794185	C	G	AS_SB_TABLE=34,11|4,0;DP=49;ECNT=7;MBQ=36,36;MFRL=211,188;MMQ=40,24;MPOS=22;POPAF=1.70;TLOD=11.01	GT:AD:AF:DP:F1R2:F2R1:PGT:PID:PS:SB	0|1	45	4	0.1	49
Pre-Subject 1	chr1	12794187	12794187	A	G	PRAMEF1	Missense_Mutation	NM_023013	exon3	c.A560G	p.N187S	SNP	exonic	PRAMEF1	.	nonsynonymous SNV	PRAMEF1:NM_023013:exon3:c.A560G:p.N187S	48	chr1	12794187	A	G	AS_SB_TABLE=33,11|4,0;DP=48;ECNT=7;MBQ=36,36;MFRL=214,188;MMQ=43,24;MPOS=24;POPAF=1.70;TLOD=11.01	GT:AD:AF:DP:F1R2:F2R1:PGT:PID:PS:SB	0|1	44	4	0.1	48
Pre-Subject 1	chr1	12794200	12794200	G	A	PRAMEF1	Silent	NM_023013	exon3	c.G573A	p.P191P	SNP	exonic	PRAMEF1	.	synonymous SNV	PRAMEF1:NM_023013:exon3:c.G573A:p.P191P	49	chr1	12794200	G	A	AS_SB_TABLE=35,7|7,0;DP=49;ECNT=7;MBQ=36,36;MFRL=199,237;MMQ=49,27;MPOS=20;POPAF=1.68;TLOD=21.93	GT:AD:AF:DP:F1R2:F2R1:PGT:PID:PS:SB	0|1	42	7	0.16	49
Pre-Subject 1	chr1	12794205	12794205	A	C	PRAMEF1	Missense_Mutation	NM_023013	exon3	c.A578C	p.K193T	SNP	exonic	PRAMEF1	.	nonsynonymous SNV	PRAMEF1:NM_023013:exon3:c.A578C:p.K193T	48	chr1	12794205	A	C	AS_SB_TABLE=35,6|7,0;DP=49;ECNT=7;MBQ=36,36;MFRL=198,237;MMQ=50,27;MPOS=15;POPAF=1.68;TLOD=21.93	GT:AD:AF:DP:F1R2:F2R1:PGT:PID:PS:SB	0|1	41	7	0.16	48
Pre-Subject 1	chr1	12794449	12794449	A	G	PRAMEF1	Missense_Mutation	NM_023013	exon3	c.A822G	p.I274M	SNP	exonic	PRAMEF1	.	nonsynonymous SNV	PRAMEF1:NM_023013:exon3:c.A822G:p.I274M	28	chr1	12794449	A	G	AS_SB_TABLE=3,23|0,2;DP=28;ECNT=4;MBQ=36,36;MFRL=221,304;MMQ=60,30;MPOS=25;POPAF=1.89;TLOD=4.97	GT:AD:AF:DP:F1R2:F2R1:PGT:PID:PS:SB	0|1	26	2	0.1	28
Pre-Subject 1	chr1	12794470	12794470	T	C	PRAMEF1	Silent	NM_023013	exon3	c.T843C	p.S281S	SNP	exonic	PRAMEF1	.	synonymous SNV	PRAMEF1:NM_023013:exon3:c.T843C:p.S281S	19	chr1	12794470	T	C	AS_SB_TABLE=1,16|0,2;DP=19;ECNT=4;MBQ=36,36;MFRL=274,304;MMQ=51,30;MPOS=25;POPAF=1.92;TLOD=5.46	GT:AD:AF:DP:F1R2:F2R1:PGT:PID:PS:SB	0|1	17	2	0.143	19
Pre-Subject 1	chr1	12794474	12794474	C	T	PRAMEF1	Missense_Mutation	NM_023013	exon3	c.C847T	p.H283Y	SNP	exonic	PRAMEF1	.	nonsynonymous SNV	PRAMEF1:NM_023013:exon3:c.C847T:p.H283Y	17	chr1	12794474	C	T	AS_SB_TABLE=1,14|0,2;DP=18;ECNT=4;MBQ=36,36;MFRL=274,304;MMQ=51,30;MPOS=23;POPAF=2.00;TLOD=5.61	GT:AD:AF:DP:F1R2:F2R1:PGT:PID:PS:SB	0|1	15	2	0.158	17
Pre-Subject 1	chr1	12795476	12795476	A	G	PRAMEF1	Missense_Mutation	NM_001294139	exon2	c.A170G	p.Y57C	SNP	exonic	PRAMEF1	.	nonsynonymous SNV	PRAMEF1:NM_001294139:exon2:c.A170G:p.Y57C,PRAMEF1:NM_023013:exon4:c.A905G:p.Y302C	51	chr1	12795476	A	G	AS_SB_TABLE=35,8|5,3;DP=55;ECNT=8;MBQ=36,36;MFRL=252,273;MMQ=33,23;MPOS=10;POPAF=1.85;TLOD=15.97	GT:AD:AF:DP:F1R2:F2R1:SB	0/1	43	8	0.168	51
Pre-Subject 1	chr1	12795481	12795481	T	A	PRAMEF1	Missense_Mutation	NM_001294139	exon2	c.T175A	p.Y59N	SNP	exonic	PRAMEF1	.	nonsynonymous SNV	PRAMEF1:NM_001294139:exon2:c.T175A:p.Y59N,PRAMEF1:NM_023013:exon4:c.T910A:p.Y304N	54	chr1	12795481	T	A	AS_SB_TABLE=38,12|4,0;DP=57;ECNT=8;MBQ=36,34;MFRL=253,273;MMQ=28,23;MPOS=5;POPAF=7.30;TLOD=4.11	GT:AD:AF:DP:F1R2:F2R1:SB	0/1	50	4	0.076	54
Pre-Subject 1	chr1	12795495	12795495	A	G	PRAMEF1	Silent	NM_001294139	exon2	c.A189G	p.E63E	SNP	exonic	PRAMEF1	.	synonymous SNV	PRAMEF1:NM_001294139:exon2:c.A189G:p.E63E,PRAMEF1:NM_023013:exon4:c.A924G:p.E308E	58	chr1	12795495	A	G	AS_SB_TABLE=47,9|2,0;DP=58;ECNT=8;MBQ=36,34;MFRL=230,133;MMQ=28,21;MPOS=16;POPAF=0.623;TLOD=4.01	GT:AD:AF:DP:F1R2:F2R1:PGT:PID:PS:SB	0|1	56	2	0.05	58
Pre-Subject 1	chr1	12795499	12795499	A	T	PRAMEF1	Missense_Mutation	NM_001294139	exon2	c.A193T	p.M65L	SNP	exonic	PRAMEF1	.	nonsynonymous SNV	PRAMEF1:NM_001294139:exon2:c.A193T:p.M65L,PRAMEF1:NM_023013:exon4:c.A928T:p.M310L	58	chr1	12795499	A	T	AS_SB_TABLE=47,8|3,0;DP=58;ECNT=8;MBQ=36,32;MFRL=228,118;MMQ=27,22;MPOS=4;POPAF=1.85;TLOD=7.24	GT:AD:AF:DP:F1R2:F2R1:PGT:PID:PS:SB	0|1	55	3	0.067	58
Pre-Subject 1	chr1	12795504	12795504	G	A	PRAMEF1	Silent	NM_001294139	exon2	c.G198A	p.K66K	SNP	exonic	PRAMEF1	.	synonymous SNV	PRAMEF1:NM_001294139:exon2:c.G198A:p.K66K,PRAMEF1:NM_023013:exon4:c.G933A:p.K311K	55	chr1	12795504	G	A	AS_SB_TABLE=45,7|3,0;DP=55;ECNT=8;MBQ=36,36;MFRL=230,118;MMQ=27,22;MPOS=9;POPAF=1.66;TLOD=7.32	GT:AD:AF:DP:F1R2:F2R1:PGT:PID:PS:SB	0|1	52	3	0.07	55
Pre-Subject 1	chr1	12795512	12795512	C	A	PRAMEF1	Missense_Mutation	NM_001294139	exon2	c.C206A	p.S69Y	SNP	exonic	PRAMEF1	.	nonsynonymous SNV	PRAMEF1:NM_001294139:exon2:c.C206A:p.S69Y,PRAMEF1:NM_023013:exon4:c.C941A:p.S314Y	55	chr1	12795512	C	A	AS_SB_TABLE=45,6|4,0;DP=57;ECNT=8;MBQ=36,36;MFRL=221,140;MMQ=33,23;MPOS=15;POPAF=1.64;TLOD=9.86	GT:AD:AF:DP:F1R2:F2R1:PGT:PID:PS:SB	0|1	51	4	0.087	55
Pre-Subject 1	chr1	12795518	12795518	A	T	PRAMEF1	Missense_Mutation	NM_001294139	exon2	c.A212T	p.Y71F	SNP	exonic	PRAMEF1	.	nonsynonymous SNV	PRAMEF1:NM_001294139:exon2:c.A212T:p.Y71F,PRAMEF1:NM_023013:exon4:c.A947T:p.Y316F	55	chr1	12795518	A	T	AS_SB_TABLE=44,8|3,0;DP=55;ECNT=8;MBQ=36,32;MFRL=207,138;MMQ=28,40;MPOS=4;PON;POPAF=2.07;TLOD=5.28	GT:AD:AF:DP:F1R2:F2R1:SB	0/1	52	3	0.071	55
Pre-Subject 1	chr1	12795673	12795673	G	A	PRAMEF1	Missense_Mutation	NM_001294139	exon2	c.G367A	p.A123T	SNP	exonic	PRAMEF1	.	nonsynonymous SNV	PRAMEF1:NM_001294139:exon2:c.G367A:p.A123T,PRAMEF1:NM_023013:exon4:c.G1102A:p.A368T	82	chr1	12795673	G	A	AS_SB_TABLE=34,45|2,1;DP=83;ECNT=5;MBQ=36,36;MFRL=193,181;MMQ=35,22;MPOS=11;POPAF=1.82;TLOD=4.86	GT:AD:AF:DP:F1R2:F2R1:PGT:PID:PS:SB	0|1	79	3	0.048	82
Pre-Subject 1	chr1	12795694	12795694	C	T	PRAMEF1	Missense_Mutation	NM_001294139	exon2	c.C388T	p.R130C	SNP	exonic	PRAMEF1	.	nonsynonymous SNV	PRAMEF1:NM_001294139:exon2:c.C388T:p.R130C,PRAMEF1:NM_023013:exon4:c.C1123T:p.R375C	81	chr1	12795694	C	T	AS_SB_TABLE=28,47|2,4;DP=82;ECNT=5;MBQ=36,36;MFRL=196,201;MMQ=39,32;MPOS=11;POPAF=7.30;TLOD=12.42	GT:AD:AF:DP:F1R2:F2R1:PGT:PID:PS:SB	0|1	75	6	0.086	81
Pre-Subject 1	chr1	12795695	12795695	G	A	PRAMEF1	Missense_Mutation	NM_001294139	exon2	c.G389A	p.R130H	SNP	exonic	PRAMEF1	.	nonsynonymous SNV	PRAMEF1:NM_001294139:exon2:c.G389A:p.R130H,PRAMEF1:NM_023013:exon4:c.G1124A:p.R375H	79	chr1	12795695	G	A	AS_SB_TABLE=19,44|8,8;DP=82;ECNT=5;MBQ=36,36;MFRL=196,183;MMQ=40,28;MPOS=15;PON;POPAF=7.30;TLOD=33.86	GT:AD:AF:DP:F1R2:F2R1:SB	0/1	63	16	0.194	79
Pre-Subject 1	chr1	12795727	12795727	A	C	PRAMEF1	Silent	NM_001294139	exon2	c.A421C	p.R141R	SNP	exonic	PRAMEF1	.	synonymous SNV	PRAMEF1:NM_001294139:exon2:c.A421C:p.R141R,PRAMEF1:NM_023013:exon4:c.A1156C:p.R386R	96	chr1	12795727	A	C	AS_SB_TABLE=22,59|6,9;DP=99;ECNT=5;MBQ=36,36;MFRL=196,196;MMQ=40,28;MPOS=11;POPAF=1.80;TLOD=46.45	GT:AD:AF:DP:F1R2:F2R1:SB	0/1	81	15	0.161	96
Pre-Subject 1	chr1	12795729	12795729	A	C	PRAMEF1	Missense_Mutation	NM_001294139	exon2	c.A423C	p.R141S	SNP	exonic	PRAMEF1	.	nonsynonymous SNV	PRAMEF1:NM_001294139:exon2:c.A423C:p.R141S,PRAMEF1:NM_023013:exon4:c.A1158C:p.R386S	97	chr1	12795729	A	C	AS_SB_TABLE=27,58|2,10;DP=100;ECNT=5;MBQ=36,36;MFRL=196,208;MMQ=40,30;MPOS=25;PON;POPAF=0.520;TLOD=24.70	GT:AD:AF:DP:F1R2:F2R1:SB	0/1	85	12	0.133	97
Pre-Subject 1	chr1	12824987	12824987	G	A	PRAMEF11	Silent	NM_001146344	exon4	c.C1392T	p.G464G	SNP	exonic	PRAMEF11	.	synonymous SNV	PRAMEF11:NM_001146344:exon4:c.C1392T:p.G464G	34	chr1	12824987	G	A	AS_SB_TABLE=20,12|2,0;DP=38;ECNT=1;MBQ=36,32;MFRL=183,143;MMQ=60,60;MPOS=15;POPAF=7.30;TLOD=3.05	GT:AD:AF:DP:F1R2:F2R1:SB	0/1	32	2	0.083	34
Pre-Subject 1	chr1	12827473	12827473	C	A	PRAMEF11	Missense_Mutation	NM_001146344	exon3	c.G651T	p.K217N	SNP	exonic	PRAMEF11	.	nonsynonymous SNV	PRAMEF11:NM_001146344:exon3:c.G651T:p.K217N	64	chr1	12827473	C	A	AS_SB_TABLE=32,29|0,3;DP=65;ECNT=2;MBQ=36,36;MFRL=202,259;MMQ=43,20;MPOS=12;POPAF=2.11;TLOD=7.12	GT:AD:AF:DP:F1R2:F2R1:PGT:PID:PS:SB	0|1	61	3	0.062	64
Pre-Subject 1	chr1	12827478	12827478	A	G	PRAMEF11	Missense_Mutation	NM_001146344	exon3	c.T646C	p.C216R	SNP	exonic	PRAMEF11	.	nonsynonymous SNV	PRAMEF11:NM_001146344:exon3:c.T646C:p.C216R	65	chr1	12827478	A	G	AS_SB_TABLE=33,29|0,3;DP=65;ECNT=2;MBQ=36,36;MFRL=200,259;MMQ=43,20;MPOS=17;POPAF=2.10;TLOD=7.10	GT:AD:AF:DP:F1R2:F2R1:PGT:PID:PS:SB	0|1	62	3	0.062	65
Pre-Subject 1	chr1	12827668	12827668	A	G	PRAMEF11	Silent	NM_001146344	exon3	c.T456C	p.F152F	SNP	exonic	PRAMEF11	.	synonymous SNV	PRAMEF11:NM_001146344:exon3:c.T456C:p.F152F	77	chr1	12827668	A	G	AS_SB_TABLE=33,41|3,0;DP=81;ECNT=2;MBQ=36,36;MFRL=228,333;MMQ=44,27;MPOS=21;POPAF=2.69;TLOD=3.02	GT:AD:AF:DP:F1R2:F2R1:SB	0/1	74	3	0.05	77
Pre-Subject 1	chr1	12827720	12827720	T	G	PRAMEF11	Missense_Mutation	NM_001146344	exon3	c.A404C	p.K135T	SNP	exonic	PRAMEF11	.	nonsynonymous SNV	PRAMEF11:NM_001146344:exon3:c.A404C:p.K135T	84	chr1	12827720	T	G	AS_SB_TABLE=12,0|37,35;DP=87;ECNT=2;MBQ=36,36;MFRL=280,202;MMQ=32,39;MPOS=15;PON;POPAF=1.46;TLOD=235.20	GT:AD:AF:DP:F1R2:F2R1:SB	0/1	12	72	0.857	84
Pre-Subject 1	chr1	12827827	12827827	T	C	PRAMEF11	Silent	NM_001146344	exon3	c.A297G	p.R99R	SNP	exonic	PRAMEF11	.	synonymous SNV	PRAMEF11:NM_001146344:exon3:c.A297G:p.R99R	60	chr1	12827827	T	C	AS_SB_TABLE=12,43|3,2;DP=61;ECNT=2;MBQ=36,36;MFRL=227,214;MMQ=45,32;MPOS=2;PON;POPAF=1.68;TLOD=6.10	GT:AD:AF:DP:F1R2:F2R1:SB	0/1	55	5	0.091	60
Pre-Subject 1	chr1	12847526	12847526	T	C	HNRNPCL1	Missense_Mutation	NM_001013631	exon2	c.A764G	p.D255G	SNP	exonic	HNRNPCL1	.	nonsynonymous SNV	HNRNPCL1:NM_001013631:exon2:c.A764G:p.D255G	67	chr1	12847526	T	C	AS_SB_TABLE=0,0|45,22;DP=71;ECNT=2;MBQ=0,36;MFRL=0,210;MMQ=60,52;MPOS=15;PON;POPAF=0.339;TLOD=245.42	GT:AD:AF:DP:F1R2:F2R1:SB	0/1	0	67	0.986	67
Pre-Subject 1	chr1	12847536	12847536	C	G	HNRNPCL1	Missense_Mutation	NM_001013631	exon2	c.G754C	p.D252H	SNP	exonic	HNRNPCL1	.	nonsynonymous SNV	HNRNPCL1:NM_001013631:exon2:c.G754C:p.D252H	67	chr1	12847536	C	G	AS_SB_TABLE=35,28|4,0;DP=73;ECNT=2;MBQ=36,14;MFRL=195,200;MMQ=49,60;MPOS=21;POPAF=7.30;TLOD=3.30	GT:AD:AF:DP:F1R2:F2R1:SB	0/1	63	4	0.048	67
Pre-Subject 1	chr1	12847643	12847643	T	C	HNRNPCL1	Missense_Mutation	NM_001013631	exon2	c.A647G	p.K216R	SNP	exonic	HNRNPCL1	.	nonsynonymous SNV	HNRNPCL1:NM_001013631:exon2:c.A647G:p.K216R	73	chr1	12847643	T	C	AS_SB_TABLE=12,26|4,31;DP=76;ECNT=3;MBQ=36,36;MFRL=225,212;MMQ=40,40;MPOS=23;PON;POPAF=1.28;TLOD=137.26	GT:AD:AF:DP:F1R2:F2R1:PGT:PID:PS:SB	0|1	38	35	0.487	73
Pre-Subject 1	chr1	12847680	12847680	T	C	HNRNPCL1	Missense_Mutation	NM_001013631	exon2	c.A610G	p.I204V	SNP	exonic	HNRNPCL1	.	nonsynonymous SNV	HNRNPCL1:NM_001013631:exon2:c.A610G:p.I204V	61	chr1	12847680	T	C	AS_SB_TABLE=17,26|4,14;DP=62;ECNT=3;MBQ=36,36;MFRL=200,181;MMQ=40,40;MPOS=14;PON;POPAF=1.28;TLOD=61.99	GT:AD:AF:DP:F1R2:F2R1:PGT:PID:PS:SB	0|1	43	18	0.297	61
Pre-Subject 1	chr1	12859108	12859108	G	T	PRAMEF2	Missense_Mutation	NM_023014	exon2	c.G99T	p.R33S	SNP	exonic	PRAMEF2	.	nonsynonymous SNV	PRAMEF2:NM_023014:exon2:c.G99T:p.R33S	29	chr1	12859108	G	T	AS_SB_TABLE=7,7|9,6;DP=32;ECNT=1;MBQ=36,36;MFRL=207,166;MMQ=40,51;MPOS=14;PON;POPAF=0.932;TLOD=47.42	GT:AD:AF:DP:F1R2:F2R1:SB	0/1	14	15	0.5	29
Pre-Subject 1	chr1	12859915	12859915	G	A	PRAMEF2	Nonsense_Mutation	NM_023014	exon3	c.G510A	p.W170X	SNP	exonic	PRAMEF2	.	stopgain	PRAMEF2:NM_023014:exon3:c.G510A:p.W170X	52	chr1	12859915	G	A	AS_SB_TABLE=30,18|1,3;DP=55;ECNT=8;MBQ=36,32;MFRL=184,237;MMQ=40,35;MPOS=13;POPAF=1.82;TLOD=4.41	GT:AD:AF:DP:F1R2:F2R1:SB	0/1	48	4	0.083	52
Pre-Subject 1	chr1	12859949	12859949	-	GCG	PRAMEF2	In_Frame_Ins	NM_023014	exon3	c.544_545insGCG	p.S183_C473delinsGSKLVNYLTPIKYLRKSLKIIYINSIGELEIHNTCWPHLIRKLYCYLKEMKTLCKLVFSRCHHYTSDNELEGWLVTRFTSVFLRLEHLQLLKIKLITFFSGHLEQLIRCLQNPLENLELTCGNLLEEDLKCLSQFPSLGYLKHLNLSYVLLFRISLEPLGALLEKIAASLETLVLEGCQIHYSQLSAILPGLSCCSQLTTFYFGSNCMSIDALKDLLRHTSGLSKLSLETYPAPEESLNSLVRVNWEIFTPLRAELMCTLREFRQPKRIFIGPTPCPSCGSSPSEELELHLCC*	INS	exonic	PRAMEF2	.	nonframeshift insertion	PRAMEF2:NM_023014:exon3:c.544_545insGCG:p.S183_C473delinsGSKLVNYLTPIKYLRKSLKIIYINSIGELEIHNTCWPHLIRKLYCYLKEMKTLCKLVFSRCHHYTSDNELEGWLVTRFTSVFLRLEHLQLLKIKLITFFSGHLEQLIRCLQNPLENLELTCGNLLEEDLKCLSQFPSLGYLKHLNLSYVLLFRISLEPLGALLEKIAASLETLVLEGCQIHYSQLSAILPGLSCCSQLTTFYFGSNCMSIDALKDLLRHTSGLSKLSLETYPAPEESLNSLVRVNWEIFTPLRAELMCTLREFRQPKRIFIGPTPCPSCGSSPSEELELHLCC*	71	chr1	12859949	T	TGCG	AS_SB_TABLE=34,31|1,5;DP=71;ECNT=8;MBQ=36,36;MFRL=186,320;MMQ=42,39;MPOS=20;POPAF=1.80;TLOD=17.11	GT:AD:AF:DP:F1R2:F2R1:PGT:PID:PS:SB	0|1	65	6	0.1	71
Pre-Subject 1	chr1	12859955	12859957	AAG	-	PRAMEF2	In_Frame_Del	NM_023014	exon3	c.550_552del	p.K184_C473delinsLVNYLTPIKYLRKSLKIIYINSIGELEIHNTCWPHLIRKLYCYLKEMKTLCKLVFSRCHHYTSDNELEGWLVTRFTSVFLRLEHLQLLKIKLITFFSGHLEQLIRCLQNPLENLELTCGNLLEEDLKCLSQFPSLGYLKHLNLSYVLLFRISLEPLGALLEKIAASLETLVLEGCQIHYSQLSAILPGLSCCSQLTTFYFGSNCMSIDALKDLLRHTSGLSKLSLETYPAPEESLNSLVRVNWEIFTPLRAELMCTLREFRQPKRIFIGPTPCPSCGSSPSEELELHLCC*	DEL	exonic	PRAMEF2	.	nonframeshift deletion	PRAMEF2:NM_023014:exon3:c.550_552del:p.K184_C473delinsLVNYLTPIKYLRKSLKIIYINSIGELEIHNTCWPHLIRKLYCYLKEMKTLCKLVFSRCHHYTSDNELEGWLVTRFTSVFLRLEHLQLLKIKLITFFSGHLEQLIRCLQNPLENLELTCGNLLEEDLKCLSQFPSLGYLKHLNLSYVLLFRISLEPLGALLEKIAASLETLVLEGCQIHYSQLSAILPGLSCCSQLTTFYFGSNCMSIDALKDLLRHTSGLSKLSLETYPAPEESLNSLVRVNWEIFTPLRAELMCTLREFRQPKRIFIGPTPCPSCGSSPSEELELHLCC*	75	chr1	12859954	TAAG	T	AS_SB_TABLE=35,34|1,5;DP=75;ECNT=8;MBQ=36,36;MFRL=192,320;MMQ=46,39;MPOS=24;POPAF=1.96;TLOD=16.94	GT:AD:AF:DP:F1R2:F2R1:PGT:PID:PS:SB	0|1	69	6	0.094	75
Pre-Subject 1	chr1	12859958	12859958	C	T	PRAMEF2	Silent	NM_023014	exon3	c.C553T	p.L185L	SNP	exonic	PRAMEF2	.	synonymous SNV	PRAMEF2:NM_023014:exon3:c.C553T:p.L185L	72	chr1	12859958	C	T	AS_SB_TABLE=33,33|1,5;DP=72;ECNT=8;MBQ=36,36;MFRL=194,320;MMQ=47,39;MPOS=24;POPAF=1.96;TLOD=17.07	GT:AD:AF:DP:F1R2:F2R1:PGT:PID:PS:SB	0|1	66	6	0.098	72
Pre-Subject 1	chr1	12859963	12859963	C	G	PRAMEF2	Silent	NM_023014	exon3	c.C558G	p.V186V	SNP	exonic	PRAMEF2	.	synonymous SNV	PRAMEF2:NM_023014:exon3:c.C558G:p.V186V	72	chr1	12859963	C	G	AS_SB_TABLE=33,33|1,5;DP=72;ECNT=8;MBQ=36,36;MFRL=196,320;MMQ=51,39;MPOS=25;POPAF=1.96;TLOD=17.07	GT:AD:AF:DP:F1R2:F2R1:PGT:PID:PS:SB	0|1	66	6	0.098	72
Pre-Subject 1	chr1	12859965	12859965	A	G	PRAMEF2	Missense_Mutation	NM_023014	exon3	c.A560G	p.N187S	SNP	exonic	PRAMEF2	.	nonsynonymous SNV	PRAMEF2:NM_023014:exon3:c.A560G:p.N187S	70	chr1	12859965	A	G	AS_SB_TABLE=31,33|1,5;DP=71;ECNT=8;MBQ=36,36;MFRL=199,320;MMQ=51,39;MPOS=25;POPAF=1.96;TLOD=17.06	GT:AD:AF:DP:F1R2:F2R1:PGT:PID:PS:SB	0|1	64	6	0.098	70
Pre-Subject 1	chr1	12859983	12859983	A	C	PRAMEF2	Missense_Mutation	NM_023014	exon3	c.A578C	p.K193T	SNP	exonic	PRAMEF2	.	nonsynonymous SNV	PRAMEF2:NM_023014:exon3:c.A578C:p.K193T	67	chr1	12859983	A	C	AS_SB_TABLE=29,34|1,3;DP=72;ECNT=8;MBQ=36,34;MFRL=211,378;MMQ=56,41;MPOS=23;POPAF=2.01;TLOD=6.73	GT:AD:AF:DP:F1R2:F2R1:SB	0/1	63	4	0.074	67
Pre-Subject 1	chr1	12860017	12860017	T	G	PRAMEF2	Missense_Mutation	NM_023014	exon3	c.T612G	p.I204M	SNP	exonic	PRAMEF2	.	nonsynonymous SNV	PRAMEF2:NM_023014:exon3:c.T612G:p.I204M	68	chr1	12860017	T	G	AS_SB_TABLE=22,16|15,15;DP=73;ECNT=8;MBQ=36,36;MFRL=199,224;MMQ=60,60;MPOS=13;PON;POPAF=1.26;TLOD=97.52	GT:AD:AF:DP:F1R2:F2R1:SB	0/1	38	30	0.458	68
Pre-Subject 1	chr1	12860212	12860212	C	G	PRAMEF2	Silent	NM_023014	exon3	c.C807G	p.L269L	SNP	exonic	PRAMEF2	.	synonymous SNV	PRAMEF2:NM_023014:exon3:c.C807G:p.L269L	32	chr1	12860212	C	G	AS_SB_TABLE=1,18|1,12;DP=33;ECNT=4;MBQ=36,36;MFRL=224,206;MMQ=60,60;MPOS=15;PON;POPAF=0.921;TLOD=41.85	GT:AD:AF:DP:F1R2:F2R1:SB	0/1	19	13	0.412	32
Pre-Subject 1	chr1	12861340	12861340	A	T	PRAMEF2	Missense_Mutation	NM_023014	exon4	c.A986T	p.Y329F	SNP	exonic	PRAMEF2	.	nonsynonymous SNV	PRAMEF2:NM_023014:exon4:c.A986T:p.Y329F	59	chr1	12861340	A	T	AS_SB_TABLE=18,39|0,2;DP=63;ECNT=4;MBQ=36,36;MFRL=224,213;MMQ=46,39;MPOS=19;POPAF=2.12;TLOD=3.17	GT:AD:AF:DP:F1R2:F2R1:SB	0/1	57	2	0.05	59
Pre-Subject 1	chr1	12861374	12861374	A	C	PRAMEF2	Silent	NM_023014	exon4	c.A1020C	p.L340L	SNP	exonic	PRAMEF2	.	synonymous SNV	PRAMEF2:NM_023014:exon4:c.A1020C:p.L340L	46	chr1	12861374	A	C	AS_SB_TABLE=17,26|0,3;DP=50;ECNT=4;MBQ=36,36;MFRL=226,270;MMQ=60,32;MPOS=24;PON;POPAF=1.51;TLOD=3.12	GT:AD:AF:DP:F1R2:F2R1:SB	0/1	43	3	0.069	46
Pre-Subject 1	chr1	12861386	12861386	A	G	PRAMEF2	Silent	NM_023014	exon4	c.A1032G	p.L344L	SNP	exonic	PRAMEF2	.	synonymous SNV	PRAMEF2:NM_023014:exon4:c.A1032G:p.L344L	46	chr1	12861386	A	G	AS_SB_TABLE=17,23|0,6;DP=47;ECNT=4;MBQ=36,36;MFRL=220,278;MMQ=60,34;MPOS=11;PON;POPAF=1.59;TLOD=13.08	GT:AD:AF:DP:F1R2:F2R1:SB	0/1	40	6	0.145	46
Pre-Subject 1	chr1	12879853	12879853	C	G	PRAMEF4	Silent	NM_001009611	exon4	c.G1128C	p.L376L	SNP	exonic	PRAMEF4	.	synonymous SNV	PRAMEF4:NM_001009611:exon4:c.G1128C:p.L376L	32	chr1	12879853	C	G	AS_SB_TABLE=0,0|13,19;DP=32;ECNT=1;MBQ=0,36;MFRL=0,203;MMQ=60,22;MPOS=21;PON;POPAF=0.924;TLOD=132.48	GT:AD:AF:DP:F1R2:F2R1:SB	0/1	0	32	0.971	32
Pre-Subject 1	chr1	12881902	12881902	T	G	PRAMEF4	Missense_Mutation	NM_001009611	exon3	c.A827C	p.Y276S	SNP	exonic	PRAMEF4	.	nonsynonymous SNV	PRAMEF4:NM_001009611:exon3:c.A827C:p.Y276S	14	chr1	12881902	T	G	AS_SB_TABLE=0,8|6,0;DP=16;ECNT=1;MBQ=36,36;MFRL=207,160;MMQ=25,40;MPOS=6;PON;POPAF=1.37;TLOD=18.34	GT:AD:AF:DP:F1R2:F2R1:SB	0/1	8	6	0.438	14
Pre-Subject 1	chr1	12893044	12893044	T	C	PRAMEF10	Missense_Mutation	NM_001039361	exon4	c.A1297G	p.I433V	SNP	exonic	PRAMEF10	.	nonsynonymous SNV	PRAMEF10:NM_001039361:exon4:c.A1297G:p.I433V	21	chr1	12893044	T	C	AS_SB_TABLE=8,9|2,2;DP=21;ECNT=9;MBQ=36,36;MFRL=238,307;MMQ=25,25;MPOS=9;POPAF=2.03;TLOD=10.73	GT:AD:AF:DP:F1R2:F2R1:PGT:PID:PS:SB	0|1	17	4	0.2	21
Pre-Subject 1	chr1	12893053	12893053	G	A	PRAMEF10	Missense_Mutation	NM_001039361	exon4	c.C1288T	p.L430F	SNP	exonic	PRAMEF10	.	nonsynonymous SNV	PRAMEF10:NM_001039361:exon4:c.C1288T:p.L430F	22	chr1	12893053	G	A	AS_SB_TABLE=8,10|3,1;DP=22;ECNT=9;MBQ=36,36;MFRL=233,333;MMQ=25,25;MPOS=26;POPAF=2.02;TLOD=12.15	GT:AD:AF:DP:F1R2:F2R1:PGT:PID:PS:SB	0|1	18	4	0.192	22
Pre-Subject 1	chr1	12893076	12893076	T	C	PRAMEF10	Missense_Mutation	NM_001039361	exon4	c.A1265G	p.K422R	SNP	exonic	PRAMEF10	.	nonsynonymous SNV	PRAMEF10:NM_001039361:exon4:c.A1265G:p.K422R	26	chr1	12893076	T	C	AS_SB_TABLE=12,10|3,1;DP=26;ECNT=9;MBQ=36,36;MFRL=270,302;MMQ=25,25;MPOS=19;POPAF=2.00;TLOD=12.31	GT:AD:AF:DP:F1R2:F2R1:PGT:PID:PS:SB	0|1	22	4	0.172	26
Pre-Subject 1	chr1	12893080	12893080	A	T	PRAMEF10	Missense_Mutation	NM_001039361	exon4	c.T1261A	p.Y421N	SNP	exonic	PRAMEF10	.	nonsynonymous SNV	PRAMEF10:NM_001039361:exon4:c.T1261A:p.Y421N	27	chr1	12893080	A	T	AS_SB_TABLE=14,9|3,1;DP=27;ECNT=9;MBQ=36,36;MFRL=271,302;MMQ=25,25;MPOS=23;POPAF=2.00;TLOD=12.23	GT:AD:AF:DP:F1R2:F2R1:PGT:PID:PS:SB	0|1	23	4	0.167	27
Pre-Subject 1	chr1	12893086	12893086	G	T	PRAMEF10	Missense_Mutation	NM_001039361	exon4	c.C1255A	p.L419I	SNP	exonic	PRAMEF10	.	nonsynonymous SNV	PRAMEF10:NM_001039361:exon4:c.C1255A:p.L419I	27	chr1	12893086	G	T	AS_SB_TABLE=15,8|3,1;DP=27;ECNT=9;MBQ=36,36;MFRL=268,302;MMQ=40,25;MPOS=24;POPAF=1.96;TLOD=12.23	GT:AD:AF:DP:F1R2:F2R1:PGT:PID:PS:SB	0|1	23	4	0.167	27
Pre-Subject 1	chr1	12893103	12893103	G	T	PRAMEF10	Missense_Mutation	NM_001039361	exon4	c.C1238A	p.P413H	SNP	exonic	PRAMEF10	.	nonsynonymous SNV	PRAMEF10:NM_001039361:exon4:c.C1238A:p.P413H	31	chr1	12893103	G	T	AS_SB_TABLE=18,9|4,0;DP=31;ECNT=9;MBQ=36,36;MFRL=259,302;MMQ=37,33;MPOS=16;POPAF=1.85;TLOD=12.00	GT:AD:AF:DP:F1R2:F2R1:PGT:PID:PS:SB	0|1	27	4	0.151	31
Pre-Subject 1	chr1	12893120	12893120	T	C	PRAMEF10	Silent	NM_001039361	exon4	c.A1221G	p.L407L	SNP	exonic	PRAMEF10	.	synonymous SNV	PRAMEF10:NM_001039361:exon4:c.A1221G:p.L407L	34	chr1	12893120	T	C	AS_SB_TABLE=19,10|5,0;DP=34;ECNT=9;MBQ=36,36;MFRL=256,248;MMQ=25,27;MPOS=12;POPAF=1.57;TLOD=15.51	GT:AD:AF:DP:F1R2:F2R1:PGT:PID:PS:SB	0|1	29	5	0.167	34
Pre-Subject 1	chr1	12893137	12893137	G	C	PRAMEF10	Missense_Mutation	NM_001039361	exon4	c.C1204G	p.R402G	SNP	exonic	PRAMEF10	.	nonsynonymous SNV	PRAMEF10:NM_001039361:exon4:c.C1204G:p.R402G	37	chr1	12893137	G	C	AS_SB_TABLE=26,8|3,0;DP=37;ECNT=9;MBQ=36,36;MFRL=257,237;MMQ=39,27;MPOS=29;POPAF=7.30;TLOD=8.03	GT:AD:AF:DP:F1R2:F2R1:PGT:PID:PS:SB	0|1	34	3	0.103	37
Pre-Subject 1	chr1	12893159	12893159	C	T	PRAMEF10	Silent	NM_001039361	exon4	c.G1182A	p.L394L	SNP	exonic	PRAMEF10	.	synonymous SNV	PRAMEF10:NM_001039361:exon4:c.G1182A:p.L394L	46	chr1	12893159	C	T	AS_SB_TABLE=36,6|4,0;DP=46;ECNT=9;MBQ=36,36;MFRL=242,234;MMQ=40,26;MPOS=22;POPAF=1.92;TLOD=11.12	GT:AD:AF:DP:F1R2:F2R1:PGT:PID:PS:SB	0|1	42	4	0.104	46
Pre-Subject 1	chr1	12893169	12893169	A	G	PRAMEF10	Missense_Mutation	NM_001039361	exon4	c.T1172C	p.M391T	SNP	exonic	PRAMEF10	.	nonsynonymous SNV	PRAMEF10:NM_001039361:exon4:c.T1172C:p.M391T	47	chr1	12893169	A	G	AS_SB_TABLE=37,5|4,1;DP=49;ECNT=1;MBQ=36,36;MFRL=239,237;MMQ=40,25;MPOS=14;PON;POPAF=1.82;TLOD=11.44	GT:AD:AF:DP:F1R2:F2R1:SB	0/1	42	5	0.122	47
Pre-Subject 1	chr1	12920262	12920262	G	T	PRAMEF7	Missense_Mutation	NM_001012277	exon4	c.G1274T	p.C425F	SNP	exonic	PRAMEF7	.	nonsynonymous SNV	PRAMEF7:NM_001012277:exon4:c.G1274T:p.C425F	65	chr1	12920262	G	T	AS_SB_TABLE=39,21|2,3;DP=68;ECNT=6;MBQ=36,36;MFRL=205,232;MMQ=25,24;MPOS=5;POPAF=3.24;TLOD=9.00	GT:AD:AF:DP:F1R2:F2R1:PGT:PID:PS:SB	0|1	60	5	0.09	65
Pre-Subject 1	chr1	12920268	12920268	G	A	PRAMEF7	Missense_Mutation	NM_001012277	exon4	c.G1280A	p.G427E	SNP	exonic	PRAMEF7	.	nonsynonymous SNV	PRAMEF7:NM_001012277:exon4:c.G1280A:p.G427E	60	chr1	12920268	G	A	AS_SB_TABLE=36,20|1,3;DP=60;ECNT=6;MBQ=36,36;MFRL=210,217;MMQ=25,24;MPOS=17;POPAF=3.30;TLOD=7.39	GT:AD:AF:DP:F1R2:F2R1:PGT:PID:PS:SB	0|1	56	4	0.08	60
Pre-Subject 1	chr1	12920276	12920276	G	T	PRAMEF7	Missense_Mutation	NM_001012277	exon4	c.G1288T	p.A430S	SNP	exonic	PRAMEF7	.	nonsynonymous SNV	PRAMEF7:NM_001012277:exon4:c.G1288T:p.A430S	51	chr1	12920276	G	T	AS_SB_TABLE=30,19|1,1;DP=51;ECNT=6;MBQ=36,36;MFRL=201,216;MMQ=25,24;MPOS=9;POPAF=3.42;TLOD=4.13	GT:AD:AF:DP:F1R2:F2R1:PGT:PID:PS:SB	0|1	49	2	0.055	51
Pre-Subject 1	chr1	12920279	12920279	G	C	PRAMEF7	Missense_Mutation	NM_001012277	exon4	c.G1291C	p.E431Q	SNP	exonic	PRAMEF7	.	nonsynonymous SNV	PRAMEF7:NM_001012277:exon4:c.G1291C:p.E431Q	50	chr1	12920279	G	C	AS_SB_TABLE=30,18|1,1;DP=50;ECNT=6;MBQ=36,36;MFRL=203,216;MMQ=25,24;MPOS=6;POPAF=3.42;TLOD=4.15	GT:AD:AF:DP:F1R2:F2R1:PGT:PID:PS:SB	0|1	48	2	0.056	50
Pre-Subject 1	chr1	12920302	12920302	C	G	PRAMEF7	Missense_Mutation	NM_001012277	exon4	c.C1314G	p.N438K	SNP	exonic	PRAMEF7	.	nonsynonymous SNV	PRAMEF7:NM_001012277:exon4:c.C1314G:p.N438K	31	chr1	12920302	C	G	AS_SB_TABLE=5,4|11,11;DP=32;ECNT=6;MBQ=36,36;MFRL=214,165;MMQ=25,25;MPOS=12;PON;POPAF=7.30;TLOD=75.39	GT:AD:AF:DP:F1R2:F2R1:SB	0/1	9	22	0.699	31
Pre-Subject 1	chr1	12920307	12920307	T	C	PRAMEF7	Missense_Mutation	NM_001012277	exon4	c.T1319C	p.L440P	SNP	exonic	PRAMEF7	.	nonsynonymous SNV	PRAMEF7:NM_001012277:exon4:c.T1319C:p.L440P	28	chr1	12920307	T	C	AS_SB_TABLE=10,7|4,7;DP=30;ECNT=6;MBQ=36,32;MFRL=201,162;MMQ=25,25;MPOS=6;PON;POPAF=7.30;TLOD=25.91	GT:AD:AF:DP:F1R2:F2R1:SB	0/1	17	11	0.38	28
Pre-Subject 1	chr1	12920412	12920412	G	A	PRAMEF7	Silent	NM_001012277	exon4	c.G1424A	p.X475X	SNP	exonic	PRAMEF7	.	synonymous SNV	PRAMEF7:NM_001012277:exon4:c.G1424A:p.X475X	21	chr1	12920412	G	A	AS_SB_TABLE=0,14|0,7;DP=22;ECNT=5;MBQ=36,36;MFRL=221,219;MMQ=25,25;MPOS=23;PON;POPAF=0.917;TLOD=14.42	GT:AD:AF:DP:F1R2:F2R1:PGT:PID:PS:SB	0|1	14	7	0.347	21
Pre-Subject 1	chr1	12938681	12938681	G	A	PRAMEF6	Silent	NM_001010889	exon4	c.C1425T	p.C475C	SNP	exonic	PRAMEF6	.	synonymous SNV	PRAMEF6:NM_001010889:exon4:c.C1425T:p.C475C	22	chr1	12938681	G	A	AS_SB_TABLE=20,0|2,0;DP=23;ECNT=2;MBQ=36,36;MFRL=199,174;MMQ=25,24;MPOS=29;POPAF=2.25;TLOD=3.45	GT:AD:AF:DP:F1R2:F2R1:PGT:PID:PS:SB	0|1	20	2	0.124	22
Pre-Subject 1	chr1	12938765	12938765	G	A	PRAMEF6	Silent	NM_001010889	exon4	c.C1341T	p.H447H	SNP	exonic	PRAMEF6	.	synonymous SNV	PRAMEF6:NM_001010889:exon4:c.C1341T:p.H447H	53	chr1	12938765	G	A	AS_SB_TABLE=31,15|3,4;DP=54;ECNT=8;MBQ=36,36;MFRL=174,176;MMQ=24,22;MPOS=11;POPAF=3.01;TLOD=9.26	GT:AD:AF:DP:F1R2:F2R1:SB	0/1	46	7	0.13	53
Pre-Subject 1	chr1	12938780	12938780	C	A	PRAMEF6	Silent	NM_001010889	exon4	c.G1326T	p.V442V	SNP	exonic	PRAMEF6	.	synonymous SNV	PRAMEF6:NM_001010889:exon4:c.G1326T:p.V442V	74	chr1	12938780	C	A	AS_SB_TABLE=25,12|23,14;DP=78;ECNT=8;MBQ=36,36;MFRL=194,173;MMQ=24,24;MPOS=18;PON;POPAF=2.50;TLOD=78.38	GT:AD:AF:DP:F1R2:F2R1:SB	0/1	37	37	0.493	74
Pre-Subject 1	chr1	12938800	12938800	C	G	PRAMEF6	Missense_Mutation	NM_001010889	exon4	c.G1306C	p.A436P	SNP	exonic	PRAMEF6	.	nonsynonymous SNV	PRAMEF6:NM_001010889:exon4:c.G1306C:p.A436P	108	chr1	12938800	C	G	AS_SB_TABLE=62,36|6,4;DP=108;ECNT=8;MBQ=36,36;MFRL=177,180;MMQ=24,22;MPOS=28;POPAF=3.21;TLOD=30.36	GT:AD:AF:DP:F1R2:F2R1:PGT:PID:PS:SB	0|1	98	10	0.095	108
Pre-Subject 1	chr1	12938806	12938806	T	G	PRAMEF6	Missense_Mutation	NM_001010889	exon4	c.A1300C	p.I434L	SNP	exonic	PRAMEF6	.	nonsynonymous SNV	PRAMEF6:NM_001010889:exon4:c.A1300C:p.I434L	120	chr1	12938806	T	G	AS_SB_TABLE=70,40|6,4;DP=120;ECNT=8;MBQ=36,36;MFRL=191,180;MMQ=24,22;MPOS=22;POPAF=3.21;TLOD=29.80	GT:AD:AF:DP:F1R2:F2R1:PGT:PID:PS:SB	0|1	110	10	0.084	120
Pre-Subject 1	chr1	12938810	12938810	A	G	PRAMEF6	Silent	NM_001010889	exon4	c.T1296C	p.A432A	SNP	exonic	PRAMEF6	.	synonymous SNV	PRAMEF6:NM_001010889:exon4:c.T1296C:p.A432A	120	chr1	12938810	A	G	AS_SB_TABLE=70,40|6,4;DP=120;ECNT=8;MBQ=36,36;MFRL=191,180;MMQ=24,22;MPOS=23;POPAF=3.19;TLOD=29.80	GT:AD:AF:DP:F1R2:F2R1:PGT:PID:PS:SB	0|1	110	10	0.084	120
Pre-Subject 1	chr1	12938858	12938858	G	T	PRAMEF6	Silent	NM_001010889	exon4	c.C1248A	p.P416P	SNP	exonic	PRAMEF6	.	synonymous SNV	PRAMEF6:NM_001010889:exon4:c.C1248A:p.P416P	69	chr1	12938858	G	T	AS_SB_TABLE=29,37|2,1;DP=74;ECNT=8;MBQ=36,36;MFRL=156,184;MMQ=24,20;MPOS=4;POPAF=3.71;TLOD=3.23	GT:AD:AF:DP:F1R2:F2R1:SB	0/1	66	3	0.06	69
Pre-Subject 1	chr1	12938859	12938859	G	A	PRAMEF6	Missense_Mutation	NM_001010889	exon4	c.C1247T	p.P416L	SNP	exonic	PRAMEF6	.	nonsynonymous SNV	PRAMEF6:NM_001010889:exon4:c.C1247T:p.P416L	67	chr1	12938859	G	A	AS_SB_TABLE=16,17|13,21;DP=72;ECNT=8;MBQ=36,36;MFRL=162,157;MMQ=24,24;MPOS=13;PON;POPAF=3.07;TLOD=74.75	GT:AD:AF:DP:F1R2:F2R1:SB	0/1	33	34	0.498	67
Pre-Subject 1	chr1	12938964	12938964	T	G	PRAMEF6	Missense_Mutation	NM_001010889	exon4	c.A1142C	p.N381T	SNP	exonic	PRAMEF6	.	nonsynonymous SNV	PRAMEF6:NM_001010889:exon4:c.A1142C:p.N381T	22	chr1	12938964	T	G	AS_SB_TABLE=0,19|0,3;DP=22;ECNT=2;MBQ=36,36;MFRL=213,235;MMQ=24,22;MPOS=8;POPAF=7.30;TLOD=5.11	GT:AD:AF:DP:F1R2:F2R1:SB	0/1	19	3	0.166	22
Pre-Subject 1	chr1	12938982	12938982	C	T	PRAMEF6	Missense_Mutation	NM_001010889	exon4	c.G1124A	p.S375N	SNP	exonic	PRAMEF6	.	nonsynonymous SNV	PRAMEF6:NM_001010889:exon4:c.G1124A:p.S375N	16	chr1	12938982	C	T	AS_SB_TABLE=0,14|0,2;DP=19;ECNT=2;MBQ=36,25;MFRL=226,240;MMQ=24,22;MPOS=15;POPAF=7.30;TLOD=3.84	GT:AD:AF:DP:F1R2:F2R1:SB	0/1	14	2	0.164	16
Pre-Subject 1	chr1	13178805	13178805	C	T	PRAMEF9	Silent	NM_001010890	exon3	c.C1110T	p.N370N	SNP	exonic	PRAMEF9	.	synonymous SNV	PRAMEF9:NM_001010890:exon3:c.C1110T:p.N370N	14	chr1	13178805	C	T	AS_SB_TABLE=11,0|3,0;DP=15;ECNT=3;MBQ=36,36;MFRL=293,262;MMQ=24,25;MPOS=15;POPAF=7.30;TLOD=3.20	GT:AD:AF:DP:F1R2:F2R1:SB	0/1	11	3	0.231	14
Pre-Subject 1	chr1	13178820	13178820	C	G	PRAMEF9	Silent	NM_001010890	exon3	c.C1125G	p.A375A	SNP	exonic	PRAMEF9	.	synonymous SNV	PRAMEF9:NM_001010890:exon3:c.C1125G:p.A375A	15	chr1	13178820	C	G	AS_SB_TABLE=7,0|8,0;DP=15;ECNT=3;MBQ=32,36;MFRL=219,267;MMQ=25,25;MPOS=20;POPAF=7.30;TLOD=14.58	GT:AD:AF:DP:F1R2:F2R1:SB	0/1	7	8	0.525	15
Pre-Subject 1	chr1	13178835	13178835	T	G	PRAMEF9	Missense_Mutation	NM_001010890	exon3	c.T1140G	p.F380L	SNP	exonic	PRAMEF9	.	nonsynonymous SNV	PRAMEF9:NM_001010890:exon3:c.T1140G:p.F380L	19	chr1	13178835	T	G	AS_SB_TABLE=10,0|9,0;DP=19;ECNT=3;MBQ=36,32;MFRL=258,219;MMQ=25,25;MPOS=19;POPAF=7.30;TLOD=18.05	GT:AD:AF:DP:F1R2:F2R1:SB	0/1	10	9	0.471	19
Pre-Subject 1	chr1	13198427	13198427	A	C	PRAMEF13	Missense_Mutation	NM_001291380	exon3	c.T767G	p.V256G	SNP	exonic	PRAMEF13	.	nonsynonymous SNV	PRAMEF13:NM_001291380:exon3:c.T767G:p.V256G	25	chr1	13198427	A	C	AS_SB_TABLE=16,0|9,0;DP=26;ECNT=2;MBQ=36,36;MFRL=255,245;MMQ=27,25;MPOS=21;POPAF=7.30;TLOD=24.59	GT:AD:AF:DP:F1R2:F2R1:SB	0/1	16	9	0.375	25
Pre-Subject 1	chr1	13198460	13198460	G	T	PRAMEF13	Missense_Mutation	NM_001291380	exon3	c.C734A	p.S245Y	SNP	exonic	PRAMEF13	.	nonsynonymous SNV	PRAMEF13:NM_001291380:exon3:c.C734A:p.S245Y	22	chr1	13198460	G	T	AS_SB_TABLE=17,0|5,0;DP=22;ECNT=2;MBQ=36,36;MFRL=213,213;MMQ=25,40;MPOS=18;POPAF=7.30;TLOD=12.65	GT:AD:AF:DP:F1R2:F2R1:SB	0/1	17	5	0.25	22
Pre-Subject 1	chr1	13318448	13318448	T	A	PRAMEF15	Missense_Mutation	NM_001098376	exon2	c.T41A	p.L14H	SNP	exonic	PRAMEF15	.	nonsynonymous SNV	PRAMEF15:NM_001098376:exon2:c.T41A:p.L14H	43	chr1	13318448	T	A	AS_SB_TABLE=36,4|1,2;DP=43;ECNT=2;MBQ=36,36;MFRL=209,285;MMQ=23,24;MPOS=28;PON;POPAF=7.30;TLOD=3.85	GT:AD:AF:DP:F1R2:F2R1:SB	0/1	40	3	0.09	43
Pre-Subject 1	chr1	13318452	13318452	A	G	PRAMEF15	Silent	NM_001098376	exon2	c.A45G	p.A15A	SNP	exonic	PRAMEF15	.	synonymous SNV	PRAMEF15:NM_001098376:exon2:c.A45G:p.A15A	42	chr1	13318452	A	G	AS_SB_TABLE=32,4|4,2;DP=45;ECNT=2;MBQ=36,36;MFRL=209,202;MMQ=23,21;MPOS=25;PON;POPAF=7.30;TLOD=12.89	GT:AD:AF:DP:F1R2:F2R1:SB	0/1	36	6	0.163	42
Pre-Subject 1	chr1	13343006	13343006	T	A	PRAMEF14	Missense_Mutation	NM_001024661	exon4	c.A947T	p.Y316F	SNP	exonic	PRAMEF14	.	nonsynonymous SNV	PRAMEF14:NM_001024661:exon4:c.A947T:p.Y316F	26	chr1	13343006	T	A	AS_SB_TABLE=7,17|0,2;DP=28;ECNT=2;MBQ=36,34;MFRL=188,220;MMQ=40,22;MPOS=20;POPAF=7.30;TLOD=3.23	GT:AD:AF:DP:F1R2:F2R1:SB	0/1	24	2	0.106	26
Pre-Subject 1	chr1	13343043	13343043	A	T	PRAMEF14	Missense_Mutation	NM_001024661	exon4	c.T910A	p.Y304N	SNP	exonic	PRAMEF14	.	nonsynonymous SNV	PRAMEF14:NM_001024661:exon4:c.T910A:p.Y304N	20	chr1	13343043	A	T	AS_SB_TABLE=7,11|0,2;DP=21;ECNT=2;MBQ=36,34;MFRL=196,258;MMQ=38,22;MPOS=6;POPAF=7.30;TLOD=5.39	GT:AD:AF:DP:F1R2:F2R1:SB	0/1	18	2	0.136	20
Pre-Subject 1	chr1	13345245	13345245	A	C	PRAMEF14	Missense_Mutation	NM_001024661	exon2	c.T70G	p.S24A	SNP	exonic	PRAMEF14	.	nonsynonymous SNV	PRAMEF14:NM_001024661:exon2:c.T70G:p.S24A	14	chr1	13345245	A	C	AS_SB_TABLE=3,7|0,4;DP=17;ECNT=4;MBQ=36,36;MFRL=213,178;MMQ=23,23;MPOS=29;POPAF=7.30;TLOD=4.41	GT:AD:AF:DP:F1R2:F2R1:SB	0/1	10	4	0.234	14
Pre-Subject 1	chr1	13345267	13345267	G	A	PRAMEF14	Silent	NM_001024661	exon2	c.C48T	p.S16S	SNP	exonic	PRAMEF14	.	synonymous SNV	PRAMEF14:NM_001024661:exon2:c.C48T:p.S16S	23	chr1	13345267	G	A	AS_SB_TABLE=5,12|0,6;DP=23;ECNT=4;MBQ=36,36;MFRL=217,211;MMQ=23,23;MPOS=22;POPAF=7.30;TLOD=12.27	GT:AD:AF:DP:F1R2:F2R1:PGT:PID:PS:SB	0|1	17	6	0.253	23
Pre-Subject 1	chr1	13345274	13345274	C	A	PRAMEF14	Missense_Mutation	NM_001024661	exon2	c.G41T	p.G14V	SNP	exonic	PRAMEF14	.	nonsynonymous SNV	PRAMEF14:NM_001024661:exon2:c.G41T:p.G14V	24	chr1	13345274	C	A	AS_SB_TABLE=5,13|0,6;DP=24;ECNT=4;MBQ=36,36;MFRL=220,211;MMQ=23,23;MPOS=19;POPAF=7.30;TLOD=12.27	GT:AD:AF:DP:F1R2:F2R1:PGT:PID:PS:SB	0|1	18	6	0.253	24
Pre-Subject 1	chr1	13390853	13390853	A	C	PRAMEF17	Missense_Mutation	NM_001099851	exon2	c.A800C	p.Y267S	SNP	exonic	PRAMEF17	.	nonsynonymous SNV	PRAMEF17:NM_001099851:exon2:c.A800C:p.Y267S	40	chr1	13390853	A	C	AS_SB_TABLE=5,33|0,2;DP=41;ECNT=2;MBQ=36,36;MFRL=244,305;MMQ=60,43;MPOS=16;POPAF=7.30;TLOD=3.64	GT:AD:AF:DP:F1R2:F2R1:SB	0/1	38	2	0.071	40
Pre-Subject 1	chr1	13420814	13420814	T	G	PRAMEF20	Missense_Mutation	NM_001099852	exon4	c.T984G	p.S328R	SNP	exonic	PRAMEF20	.	nonsynonymous SNV	PRAMEF20:NM_001099852:exon4:c.T984G:p.S328R	107	chr1	13420814	T	G	AS_SB_TABLE=33,69|5,0;DP=108;ECNT=5;MBQ=36,32;MFRL=177,181;MMQ=60,40;MPOS=10;POPAF=7.30;TLOD=9.47	GT:AD:AF:DP:F1R2:F2R1:PGT:PID:PS:SB	0|1	102	5	0.054	107
Pre-Subject 1	chr1	13420819	13420819	C	T	PRAMEF20	Missense_Mutation	NM_001099852	exon4	c.C989T	p.T330I	SNP	exonic	PRAMEF20	.	nonsynonymous SNV	PRAMEF20:NM_001099852:exon4:c.C989T:p.T330I	106	chr1	13420819	C	T	AS_SB_TABLE=32,69|5,0;DP=110;ECNT=5;MBQ=36,36;MFRL=177,181;MMQ=60,40;MPOS=15;POPAF=7.30;TLOD=9.51	GT:AD:AF:DP:F1R2:F2R1:PGT:PID:PS:SB	0|1	101	5	0.055	106
Pre-Subject 1	chr1	13420838	13420838	C	T	PRAMEF20	Silent	NM_001099852	exon4	c.C1008T	p.S336S	SNP	exonic	PRAMEF20	.	synonymous SNV	PRAMEF20:NM_001099852:exon4:c.C1008T:p.S336S	101	chr1	13420838	C	T	AS_SB_TABLE=31,63|7,0;DP=105;ECNT=5;MBQ=36,36;MFRL=192,228;MMQ=60,40;MPOS=28;POPAF=7.30;TLOD=17.38	GT:AD:AF:DP:F1R2:F2R1:PGT:PID:PS:SB	0|1	94	7	0.074	101
Pre-Subject 1	chr1	13420847	13420847	G	T	PRAMEF20	Silent	NM_001099852	exon4	c.G1017T	p.P339P	SNP	exonic	PRAMEF20	.	synonymous SNV	PRAMEF20:NM_001099852:exon4:c.G1017T:p.P339P	102	chr1	13420847	G	T	AS_SB_TABLE=30,64|8,0;DP=105;ECNT=5;MBQ=36,36;MFRL=196,205;MMQ=60,40;MPOS=28;POPAF=7.30;TLOD=20.13	GT:AD:AF:DP:F1R2:F2R1:PGT:PID:PS:SB	0|1	94	8	0.087	102
Pre-Subject 1	chr1	13420859	13420859	C	G	PRAMEF20	Silent	NM_001099852	exon4	c.C1029G	p.L343L	SNP	exonic	PRAMEF20	.	synonymous SNV	PRAMEF20:NM_001099852:exon4:c.C1029G:p.L343L	104	chr1	13420859	C	G	AS_SB_TABLE=38,61|4,1;DP=106;ECNT=5;MBQ=36,36;MFRL=198,228;MMQ=60,42;MPOS=16;POPAF=7.30;TLOD=10.08	GT:AD:AF:DP:F1R2:F2R1:SB	0/1	99	5	0.058	104
Pre-Subject 1	chr1	13420926	13420926	G	A	PRAMEF20	Missense_Mutation	NM_001099852	exon4	c.G1096A	p.V366I	SNP	exonic	PRAMEF20	.	nonsynonymous SNV	PRAMEF20:NM_001099852:exon4:c.G1096A:p.V366I	92	chr1	13420926	G	A	AS_SB_TABLE=36,38|8,10;DP=95;ECNT=6;MBQ=36,36;MFRL=248,196;MMQ=60,49;MPOS=23;POPAF=7.30;TLOD=32.93	GT:AD:AF:DP:F1R2:F2R1:SB	0/1	74	18	0.159	92
Pre-Subject 1	chr1	13420937	13420937	C	T	PRAMEF20	Silent	NM_001099852	exon4	c.C1107T	p.I369I	SNP	exonic	PRAMEF20	.	synonymous SNV	PRAMEF20:NM_001099852:exon4:c.C1107T:p.I369I	86	chr1	13420937	C	T	AS_SB_TABLE=30,39|7,10;DP=86;ECNT=6;MBQ=36,36;MFRL=252,193;MMQ=60,49;MPOS=25;POPAF=7.30;TLOD=29.95	GT:AD:AF:DP:F1R2:F2R1:SB	0/1	69	17	0.156	86
Pre-Subject 1	chr1	13420951	13420951	G	A	PRAMEF20	Missense_Mutation	NM_001099852	exon4	c.G1121A	p.S374N	SNP	exonic	PRAMEF20	.	nonsynonymous SNV	PRAMEF20:NM_001099852:exon4:c.G1121A:p.S374N	88	chr1	13420951	G	A	AS_SB_TABLE=26,48|5,9;DP=92;ECNT=6;MBQ=36,36;MFRL=250,187;MMQ=60,49;MPOS=25;POPAF=7.30;TLOD=20.96	GT:AD:AF:DP:F1R2:F2R1:SB	0/1	74	14	0.123	88
Pre-Subject 1	chr1	13421002	13421002	C	T	PRAMEF20	Missense_Mutation	NM_001099852	exon4	c.C1172T	p.T391M	SNP	exonic	PRAMEF20	.	nonsynonymous SNV	PRAMEF20:NM_001099852:exon4:c.C1172T:p.T391M	87	chr1	13421002	C	T	AS_SB_TABLE=31,43|6,7;DP=91;ECNT=6;MBQ=36,36;MFRL=214,202;MMQ=60,40;MPOS=16;POPAF=7.30;TLOD=18.36	GT:AD:AF:DP:F1R2:F2R1:SB	0/1	74	13	0.118	87
Pre-Subject 1	chr1	13421049	13421049	T	A	PRAMEF20	Missense_Mutation	NM_001099852	exon4	c.T1219A	p.L407I	SNP	exonic	PRAMEF20	.	nonsynonymous SNV	PRAMEF20:NM_001099852:exon4:c.T1219A:p.L407I	98	chr1	13421049	T	A	AS_SB_TABLE=41,44|6,7;DP=102;ECNT=6;MBQ=36,36;MFRL=210,230;MMQ=60,60;MPOS=15;POPAF=7.30;TLOD=16.99	GT:AD:AF:DP:F1R2:F2R1:SB	0/1	85	13	0.111	98
Pre-Subject 1	chr1	13421064	13421064	T	C	PRAMEF20	Missense_Mutation	NM_001099852	exon4	c.T1234C	p.Y412H	SNP	exonic	PRAMEF20	.	nonsynonymous SNV	PRAMEF20:NM_001099852:exon4:c.T1234C:p.Y412H	90	chr1	13421064	T	C	AS_SB_TABLE=44,39|4,3;DP=98;ECNT=6;MBQ=36,36;MFRL=221,256;MMQ=60,44;MPOS=5;POPAF=7.30;TLOD=4.84	GT:AD:AF:DP:F1R2:F2R1:SB	0/1	83	7	0.06	90
Pre-Subject 1	chr1	13421158	13421158	C	A	PRAMEF20	Missense_Mutation	NM_001099852	exon4	c.C1328A	p.A443D	SNP	exonic	PRAMEF20	.	nonsynonymous SNV	PRAMEF20:NM_001099852:exon4:c.C1328A:p.A443D	71	chr1	13421158	C	A	AS_SB_TABLE=24,45|0,2;DP=74;ECNT=4;MBQ=36,25;MFRL=174,255;MMQ=60,40;MPOS=30;POPAF=7.30;TLOD=3.77	GT:AD:AF:DP:F1R2:F2R1:PGT:PID:PS:SB	0|1	69	2	0.042	71
Pre-Subject 1	chr1	13421166	13421166	G	C	PRAMEF20	Missense_Mutation	NM_001099852	exon4	c.G1336C	p.E446Q	SNP	exonic	PRAMEF20	.	nonsynonymous SNV	PRAMEF20:NM_001099852:exon4:c.G1336C:p.E446Q	67	chr1	13421166	G	C	AS_SB_TABLE=21,44|0,2;DP=67;ECNT=4;MBQ=36,36;MFRL=174,255;MMQ=60,40;MPOS=30;POPAF=7.30;TLOD=3.89	GT:AD:AF:DP:F1R2:F2R1:PGT:PID:PS:SB	0|1	65	2	0.046	67
Pre-Subject 1	chr1	13421168	13421168	G	T	PRAMEF20	Missense_Mutation	NM_001099852	exon4	c.G1338T	p.E446D	SNP	exonic	PRAMEF20	.	nonsynonymous SNV	PRAMEF20:NM_001099852:exon4:c.G1338T:p.E446D	66	chr1	13421168	G	T	AS_SB_TABLE=19,45|0,2;DP=66;ECNT=4;MBQ=36,36;MFRL=174,255;MMQ=60,40;MPOS=30;POPAF=7.30;TLOD=3.94	GT:AD:AF:DP:F1R2:F2R1:PGT:PID:PS:SB	0|1	64	2	0.047	66
Pre-Subject 1	chr1	13421172	13421172	G	A	PRAMEF20	Missense_Mutation	NM_001099852	exon4	c.G1342A	p.E448K	SNP	exonic	PRAMEF20	.	nonsynonymous SNV	PRAMEF20:NM_001099852:exon4:c.G1342A:p.E448K	63	chr1	13421172	G	A	AS_SB_TABLE=19,42|0,2;DP=64;ECNT=4;MBQ=36,36;MFRL=174,255;MMQ=60,40;MPOS=26;POPAF=7.30;TLOD=4.00	GT:AD:AF:DP:F1R2:F2R1:PGT:PID:PS:SB	0|1	61	2	0.05	63
Pre-Subject 1	chr1	15730534	15730534	A	G	PLEKHM2	Silent	NM_015164	exon15	c.A2211G	p.A737A	SNP	exonic	PLEKHM2	.	synonymous SNV	PLEKHM2:NM_015164:exon15:c.A2211G:p.A737A	21	chr1	15730534	A	G	AS_SB_TABLE=7,1|13,0;DP=21;ECNT=1;MBQ=36,36;MFRL=214,241;MMQ=60,60;MPOS=17;POPAF=2.08;TLOD=43.40	GT:AD:AF:DP:F1R2:F2R1:SB	0/1	8	13	0.62	21
Pre-Subject 1	chr1	16132077	16132077	G	A	EPHA2	Missense_Mutation	NM_001329090	exon12	c.C2150T	p.T717I	SNP	exonic	EPHA2	.	nonsynonymous SNV	EPHA2:NM_001329090:exon12:c.C2150T:p.T717I,EPHA2:NM_004431:exon13:c.C2312T:p.T771I	62	chr1	16132077	G	A	AS_SB_TABLE=43,15|4,0;DP=68;ECNT=6;MBQ=36,14;MFRL=185,332;MMQ=60,60;MPOS=15;POPAF=7.30;TLOD=7.30	GT:AD:AF:DP:F1R2:F2R1:SB	0/1	58	4	0.07	62
Pre-Subject 1	chr1	16132084	16132085	CG	-	EPHA2	Frame_Shift_Del	NM_001329090	exon12	c.2142_2143del	p.E715Gfs*63	DEL	exonic	EPHA2	.	frameshift deletion	EPHA2:NM_001329090:exon12:c.2142_2143del:p.E715Gfs*63,EPHA2:NM_004431:exon13:c.2304_2305del:p.E769Gfs*63	78	chr1	16132083	TCG	T	AS_SB_TABLE=51,24|3,0;DP=78;ECNT=6;MBQ=36,36;MFRL=187,386;MMQ=60,60;MPOS=9;POPAF=7.30;TLOD=6.63	GT:AD:AF:DP:F1R2:F2R1:PGT:PID:PS:SB	0|1	75	3	0.048	78
Pre-Subject 1	chr1	16132086	16132086	G	A	EPHA2	Missense_Mutation	NM_001329090	exon12	c.C2141T	p.P714L	SNP	exonic	EPHA2	.	nonsynonymous SNV	EPHA2:NM_001329090:exon12:c.C2141T:p.P714L,EPHA2:NM_004431:exon13:c.C2303T:p.P768L	79	chr1	16132086	G	A	AS_SB_TABLE=51,25|3,0;DP=79;ECNT=6;MBQ=36,36;MFRL=185,386;MMQ=60,60;MPOS=8;POPAF=7.30;TLOD=6.65	GT:AD:AF:DP:F1R2:F2R1:PGT:PID:PS:SB	0|1	76	3	0.048	79
Pre-Subject 1	chr1	16132091	16132091	G	-	EPHA2	Frame_Shift_Del	NM_001329090	exon12	c.2136delC	p.D712Efs*45	SNP	exonic	EPHA2	.	frameshift deletion	EPHA2:NM_001329090:exon12:c.2136delC:p.D712Efs*45,EPHA2:NM_004431:exon13:c.2298delC:p.D766Efs*45	84	chr1	16132090	CG	C	AS_SB_TABLE=53,28|3,0;DP=84;ECNT=6;MBQ=36,27;MFRL=185,386;MMQ=60,60;MPOS=4;POPAF=7.30;TLOD=6.59	GT:AD:AF:DP:F1R2:F2R1:PGT:PID:PS:SB	0|1	81	3	0.047	84
Pre-Subject 1	chr1	16132097	16132097	C	A	EPHA2	Silent	NM_001329090	exon12	c.G2130T	p.L710L	SNP	exonic	EPHA2	.	synonymous SNV	EPHA2:NM_001329090:exon12:c.G2130T:p.L710L,EPHA2:NM_004431:exon13:c.G2292T:p.L764L	74	chr1	16132097	C	A	AS_SB_TABLE=43,29|2,0;DP=74;ECNT=6;MBQ=36,25;MFRL=184,314;MMQ=60,57;MPOS=29;POPAF=7.30;TLOD=3.56	GT:AD:AF:DP:F1R2:F2R1:SB	0/1	72	2	0.036	74
Pre-Subject 1	chr1	16133249	16133249	C	T	EPHA2	Missense_Mutation	NM_001329090	exon10	c.G1822A	p.G608S	SNP	exonic	EPHA2	.	nonsynonymous SNV	EPHA2:NM_001329090:exon10:c.G1822A:p.G608S,EPHA2:NM_004431:exon11:c.G1984A:p.G662S	62	chr1	16133249	C	T	AS_SB_TABLE=23,8|24,7;DP=65;ECNT=1;MBQ=36,36;MFRL=210,194;MMQ=60,60;MPOS=17;POPAF=3.53;TLOD=99.91	GT:AD:AF:DP:F1R2:F2R1:SB	0/1	31	31	0.5	62
Pre-Subject 1	chr1	16759007	16759007	T	C	MST1L	Missense_Mutation	NM_001271733	exon10	c.A1189G	p.M397V	SNP	exonic	MST1L	.	nonsynonymous SNV	MST1L:NM_001271733:exon10:c.A1189G:p.M397V	215	chr1	16759007	T	C	AS_SB_TABLE=98,93|7,17;DP=220;ECNT=2;MBQ=36,36;MFRL=177,185;MMQ=37,27;MPOS=6;PON;POPAF=0.304;TLOD=41.44	GT:AD:AF:DP:F1R2:F2R1:SB	0/1	191	24	0.121	215
Pre-Subject 1	chr1	17230638	17230638	A	C	PADI1	Silent	NM_013358	exon10	c.A1120C	p.R374R	SNP	exonic	PADI1	.	synonymous SNV	PADI1:NM_013358:exon10:c.A1120C:p.R374R	37	chr1	17230638	A	C	AS_SB_TABLE=15,7|10,5;DP=39;ECNT=1;MBQ=36,36;MFRL=196,173;MMQ=60,60;MPOS=15;PON;POPAF=0.377;TLOD=39.62	GT:AD:AF:DP:F1R2:F2R1:SB	0/1	22	15	0.392	37
Pre-Subject 1	chr1	18849352	18849352	T	C	TAS1R2	Missense_Mutation	NM_152232	exon4	c.A1456G	p.I486V	SNP	exonic	TAS1R2	.	nonsynonymous SNV	TAS1R2:NM_152232:exon4:c.A1456G:p.I486V	15	chr1	18849352	T	C	AS_SB_TABLE=0,0|12,3;DP=16;ECNT=2;MBQ=0,36;MFRL=0,196;MMQ=60,60;MPOS=18;PON;POPAF=0.708;TLOD=60.49	GT:AD:AF:DP:F1R2:F2R1:SB	0/1	0	15	0.945	15
Pre-Subject 1	chr1	19119617	19119617	A	G	UBR4	Silent	NM_020765	exon70	c.T10395C	p.A3465A	SNP	exonic	UBR4	.	synonymous SNV	UBR4:NM_020765:exon70:c.T10395C:p.A3465A	49	chr1	19119617	A	G	AS_SB_TABLE=20,27|2,0;DP=51;ECNT=1;MBQ=36,34;MFRL=211,169;MMQ=60,60;MPOS=20;POPAF=7.30;TLOD=3.41	GT:AD:AF:DP:F1R2:F2R1:SB	0/1	47	2	0.059	49
Pre-Subject 1	chr1	19745498	19745498	A	C	TMCO4	Missense_Mutation	NM_001349115	exon10	c.T911G	p.V304G	SNP	exonic	TMCO4	.	nonsynonymous SNV	TMCO4:NM_001349115:exon10:c.T911G:p.V304G	21	chr1	19745498	A	C	AS_SB_TABLE=16,0|5,0;DP=27;ECNT=1;MBQ=32,14;MFRL=214,257;MMQ=60,60;MPOS=32;POPAF=7.30;TLOD=4.06	GT:AD:AF:DP:F1R2:F2R1:SB	0/1	16	5	0.24	21
Pre-Subject 1	chr1	21885363	21885363	G	A	HSPG2	Silent	NM_001291860	exon10	c.C1167T	p.D389D	SNP	exonic	HSPG2	.	synonymous SNV	HSPG2:NM_001291860:exon10:c.C1167T:p.D389D,HSPG2:NM_005529:exon10:c.C1167T:p.D389D	45	chr1	21885363	G	A	AS_SB_TABLE=10,5|19,11;DP=47;ECNT=1;MBQ=36,36;MFRL=209,183;MMQ=60,60;MPOS=24;POPAF=2.09;TLOD=93.58	GT:AD:AF:DP:F1R2:F2R1:SB	0/1	15	30	0.642	45
Pre-Subject 1	chr1	23030576	23030576	A	C	KDM1A	Silent	NM_001009999	exon2	c.A459C	p.P153P	SNP	exonic	KDM1A	.	synonymous SNV	KDM1A:NM_001009999:exon2:c.A459C:p.P153P,KDM1A:NM_001363654:exon2:c.A459C:p.P153P,KDM1A:NM_015013:exon2:c.A459C:p.P153P	35	chr1	23030576	A	C	AS_SB_TABLE=2,25|8,0;DP=37;ECNT=4;MBQ=36,14;MFRL=234,217;MMQ=60,60;MPOS=20;POPAF=7.30;TLOD=12.57	GT:AD:AF:DP:F1R2:F2R1:SB	0/1	27	8	0.202	35
Pre-Subject 1	chr1	23030579	23030579	A	C	KDM1A	Silent	NM_001009999	exon2	c.A462C	p.P154P	SNP	exonic	KDM1A	.	synonymous SNV	KDM1A:NM_001009999:exon2:c.A462C:p.P154P,KDM1A:NM_001363654:exon2:c.A462C:p.P154P,KDM1A:NM_015013:exon2:c.A462C:p.P154P	33	chr1	23030579	A	C	AS_SB_TABLE=4,25|4,0;DP=37;ECNT=4;MBQ=36,14;MFRL=234,260;MMQ=60,60;MPOS=31;POPAF=7.30;TLOD=6.74	GT:AD:AF:DP:F1R2:F2R1:SB	0/1	29	4	0.129	33
Pre-Subject 1	chr1	23030594	23030594	A	C	KDM1A	Silent	NM_001009999	exon2	c.A477C	p.P159P	SNP	exonic	KDM1A	.	synonymous SNV	KDM1A:NM_001009999:exon2:c.A477C:p.P159P,KDM1A:NM_001363654:exon2:c.A477C:p.P159P,KDM1A:NM_015013:exon2:c.A477C:p.P159P	33	chr1	23030594	A	C	AS_SB_TABLE=2,25|6,0;DP=34;ECNT=4;MBQ=36,14;MFRL=233,236;MMQ=60,60;MPOS=18;POPAF=7.30;TLOD=9.04	GT:AD:AF:DP:F1R2:F2R1:SB	0/1	27	6	0.166	33
Pre-Subject 1	chr1	23030597	23030597	T	G	KDM1A	Silent	NM_001009999	exon2	c.T480G	p.P160P	SNP	exonic	KDM1A	.	synonymous SNV	KDM1A:NM_001009999:exon2:c.T480G:p.P160P,KDM1A:NM_001363654:exon2:c.T480G:p.P160P,KDM1A:NM_015013:exon2:c.T480G:p.P160P	31	chr1	23030597	T	G	AS_SB_TABLE=2,25|4,0;DP=34;ECNT=4;MBQ=36,14;MFRL=229,303;MMQ=60,60;MPOS=15;POPAF=7.30;TLOD=4.59	GT:AD:AF:DP:F1R2:F2R1:SB	0/1	27	4	0.104	31
Pre-Subject 1	chr1	23779451	23779451	A	C	PITHD1	Missense_Mutation	NM_020362	exon2	c.A212C	p.D71A	SNP	exonic	PITHD1	.	nonsynonymous SNV	PITHD1:NM_020362:exon2:c.A212C:p.D71A	73	chr1	23779451	A	C	AS_SB_TABLE=41,30|2,0;DP=74;ECNT=4;MBQ=36,14;MFRL=230,242;MMQ=60,60;MPOS=14;POPAF=7.30;TLOD=3.27	GT:AD:AF:DP:F1R2:F2R1:PGT:PID:PS:SB	0|1	71	2	0.039	73
Pre-Subject 1	chr1	23779457	23779457	A	C	PITHD1	Missense_Mutation	NM_020362	exon2	c.A218C	p.D73A	SNP	exonic	PITHD1	.	nonsynonymous SNV	PITHD1:NM_020362:exon2:c.A218C:p.D73A	72	chr1	23779457	A	C	AS_SB_TABLE=42,28|2,0;DP=74;ECNT=4;MBQ=36,14;MFRL=230,242;MMQ=60,60;MPOS=8;POPAF=7.30;TLOD=3.29	GT:AD:AF:DP:F1R2:F2R1:PGT:PID:PS:SB	0|1	70	2	0.04	72
Pre-Subject 1	chr1	23794264	23794264	A	C	LYPLA2	Missense_Mutation	NM_007260	exon8	c.A410C	p.H137P	SNP	exonic	LYPLA2	.	nonsynonymous SNV	LYPLA2:NM_007260:exon8:c.A410C:p.H137P	17	chr1	23794264	A	C	AS_SB_TABLE=8,4|5,0;DP=17;ECNT=1;MBQ=18,14;MFRL=194,228;MMQ=60,60;MPOS=14;POPAF=7.30;TLOD=7.35	GT:AD:AF:DP:F1R2:F2R1:SB	0/1	12	5	0.309	17
Pre-Subject 1	chr1	24342760	24342760	T	C	GRHL3	Missense_Mutation	NM_001195010	exon10	c.T1135C	p.S379P	SNP	exonic	GRHL3	.	nonsynonymous SNV	GRHL3:NM_001195010:exon10:c.T1135C:p.S379P,GRHL3:NM_021180:exon10:c.T1288C:p.S430P,GRHL3:NM_198173:exon10:c.T1273C:p.S425P,GRHL3:NM_198174:exon10:c.T1273C:p.S425P	54	chr1	24342760	T	C	AS_SB_TABLE=34,18|2,0;DP=59;ECNT=1;MBQ=36,36;MFRL=197,232;MMQ=60,60;MPOS=36;POPAF=7.30;TLOD=3.24	GT:AD:AF:DP:F1R2:F2R1:SB	0/1	52	2	0.053	54
Pre-Subject 1	chr1	24670213	24670213	A	C	SRRM1	Silent	NM_001366584	exon14	c.A2043C	p.A681A	SNP	exonic	SRRM1	.	synonymous SNV	SRRM1:NM_001366584:exon14:c.A2043C:p.A681A,SRRM1:NM_001366565:exon15:c.A2049C:p.A683A,SRRM1:NM_001366567:exon15:c.A2043C:p.A681A,SRRM1:NM_001366568:exon15:c.A2091C:p.A697A,SRRM1:NM_001366572:exon15:c.A2046C:p.A682A,SRRM1:NM_001366573:exon15:c.A2085C:p.A695A,SRRM1:NM_001366582:exon15:c.A2295C:p.A765A,SRRM1:NM_001366585:exon15:c.A2088C:p.A696A,SRRM1:NM_001366586:exon15:c.A1959C:p.A653A,SRRM1:NM_001…	38	chr1	24670213	A	C	AS_SB_TABLE=16,15|7,0;DP=41;ECNT=2;MBQ=32,14;MFRL=208,194;MMQ=60,60;MPOS=22;POPAF=7.30;TLOD=5.65	GT:AD:AF:DP:F1R2:F2R1:SB	0/1	31	7	0.16	38
Pre-Subject 1	chr1	24670219	24670219	A	C	SRRM1	Silent	NM_001366584	exon14	c.A2049C	p.P683P	SNP	exonic	SRRM1	.	synonymous SNV	SRRM1:NM_001366584:exon14:c.A2049C:p.P683P,SRRM1:NM_001366565:exon15:c.A2055C:p.P685P,SRRM1:NM_001366567:exon15:c.A2049C:p.P683P,SRRM1:NM_001366568:exon15:c.A2097C:p.P699P,SRRM1:NM_001366572:exon15:c.A2052C:p.P684P,SRRM1:NM_001366573:exon15:c.A2091C:p.P697P,SRRM1:NM_001366582:exon15:c.A2301C:p.P767P,SRRM1:NM_001366585:exon15:c.A2094C:p.P698P,SRRM1:NM_001366586:exon15:c.A1965C:p.P655P,SRRM1:NM_001…	37	chr1	24670219	A	C	AS_SB_TABLE=17,14|6,0;DP=42;ECNT=2;MBQ=36,14;MFRL=206,225;MMQ=60,60;MPOS=20;POPAF=7.30;TLOD=4.47	GT:AD:AF:DP:F1R2:F2R1:SB	0/1	31	6	0.168	37
Pre-Subject 1	chr1	25340546	25340546	C	T	TMEM50A	Silent	NM_014313	exon2	c.C60T	p.R20R	SNP	exonic	TMEM50A	.	synonymous SNV	TMEM50A:NM_014313:exon2:c.C60T:p.R20R	32	chr1	25340546	C	T	AS_SB_TABLE=12,8|8,4;DP=34;ECNT=1;MBQ=36,36;MFRL=191,166;MMQ=60,60;MPOS=15;POPAF=7.30;TLOD=35.40	GT:AD:AF:DP:F1R2:F2R1:SB	0/1	20	12	0.365	32
Pre-Subject 1	chr1	26336105	26336105	-	GTGAGACTGAGGTCTC	CRYBG2	Frame_Shift_Ins	NM_001039775	exon14	c.4173_4174insGAGACCTCAGTCTCAC	p.H1392Efs*14	INS	exonic	CRYBG2	.	frameshift insertion	CRYBG2:NM_001039775:exon14:c.4173_4174insGAGACCTCAGTCTCAC:p.H1392Efs*14	35	chr1	26336105	G	GGTGAGACTGAGGTCTC	AS_SB_TABLE=11,1|15,8;DP=36;ECNT=1;MBQ=36,36;MFRL=221,179;MMQ=60,60;MPOS=21;POPAF=2.79;TLOD=90.69	GT:AD:AF:DP:F1R2:F2R1:SB	0/1	12	23	0.646	35
Pre-Subject 1	chr1	26344777	26344929	GGACAAGGCAGCAGGAGCACCAGACCCCTGCACCACCTCCTTCTGGGTGGGAGATGAGGCAGCAGGAGCACAGGGGCCCTTCACAACCTCTTTCTGGGTGGGCGATGAGGCAGCAGGAGCACCAGGGCCCTTCACAACCTCTTTTGGGGTGGT	-	CRYBG2	In_Frame_Del	NM_001039775	exon2	c.1729_1881del	p.T577_S627del	DEL	exonic	CRYBG2	.	nonframeshift deletion	CRYBG2:NM_001039775:exon2:c.1729_1881del:p.T577_S627del	158	chr1	26344776	GGGACAAGGCAGCAGGAGCACCAGACCCCTGCACCACCTCCTTCTGGGTGGGAGATGAGGCAGCAGGAGCACAGGGGCCCTTCACAACCTCTTTCTGGGTGGGCGATGAGGCAGCAGGAGCACCAGGGCCCTTCACAACCTCTTTTGGGGTGGT	G	AS_SB_TABLE=59,52|34,13;DP=158;ECNT=3;MBQ=32,36;MFRL=204,202;MMQ=60,60;MPOS=21;POPAF=7.30;TLOD=6.11	GT:AD:AF:DP:F1R2:F2R1:SB	0/1	111	47	0.06	158
Pre-Subject 1	chr1	26367708	26367708	C	T	ZNF683	Silent	NM_001114759	exon3	c.G204A	p.P68P	SNP	exonic	ZNF683	.	synonymous SNV	ZNF683:NM_001114759:exon3:c.G204A:p.P68P,ZNF683:NM_001307925:exon3:c.G204A:p.P68P,ZNF683:NM_173574:exon3:c.G204A:p.P68P	36	chr1	26367708	C	T	AS_SB_TABLE=13,6|10,7;DP=38;ECNT=3;MBQ=36,36;MFRL=164,189;MMQ=60,60;MPOS=19;POPAF=2.64;TLOD=52.00	GT:AD:AF:DP:F1R2:F2R1:SB	0/1	19	17	0.473	36
Pre-Subject 1	chr1	26367754	26367754	T	C	ZNF683	Missense_Mutation	NM_001114759	exon3	c.A158G	p.H53R	SNP	exonic	ZNF683	.	nonsynonymous SNV	ZNF683:NM_001114759:exon3:c.A158G:p.H53R,ZNF683:NM_001307925:exon3:c.A158G:p.H53R,ZNF683:NM_173574:exon3:c.A158G:p.H53R	55	chr1	26367754	T	C	AS_SB_TABLE=17,16|7,15;DP=58;ECNT=3;MBQ=36,36;MFRL=154,182;MMQ=60,60;MPOS=15;PON;POPAF=0.431;TLOD=79.14	GT:AD:AF:DP:F1R2:F2R1:PGT:PID:PS:SB	0|1	33	22	0.412	55
Pre-Subject 1	chr1	26367769	26367769	T	C	ZNF683	Missense_Mutation	NM_001114759	exon3	c.A143G	p.D48G	SNP	exonic	ZNF683	.	nonsynonymous SNV	ZNF683:NM_001114759:exon3:c.A143G:p.D48G,ZNF683:NM_001307925:exon3:c.A143G:p.D48G,ZNF683:NM_173574:exon3:c.A143G:p.D48G	45	chr1	26367769	T	C	AS_SB_TABLE=14,13|5,13;DP=46;ECNT=3;MBQ=32,36;MFRL=153,184;MMQ=60,60;MPOS=23;PON;POPAF=0.646;TLOD=69.44	GT:AD:AF:DP:F1R2:F2R1:PGT:PID:PS:SB	0|1	27	18	0.409	45
Pre-Subject 1	chr1	26762182	26762182	A	C	ARID1A	Missense_Mutation	NM_006015	exon7	c.A2282C	p.Q761P	SNP	exonic	ARID1A	.	nonsynonymous SNV	ARID1A:NM_006015:exon7:c.A2282C:p.Q761P,ARID1A:NM_139135:exon7:c.A2282C:p.Q761P	20	chr1	26762182	A	C	AS_SB_TABLE=5,13|2,0;DP=20;ECNT=1;MBQ=36,14;MFRL=212,239;MMQ=60,60;MPOS=20;POPAF=7.30;TLOD=5.39	GT:AD:AF:DP:F1R2:F2R1:SB	0/1	18	2	0.136	20
Pre-Subject 1	chr1	26774471	26774471	A	C	ARID1A	Missense_Mutation	NM_006015	exon18	c.A4244C	p.Q1415P	SNP	exonic	ARID1A	.	nonsynonymous SNV	ARID1A:NM_006015:exon18:c.A4244C:p.Q1415P	48	chr1	26774471	A	C	AS_SB_TABLE=19,25|3,1;DP=49;ECNT=1;MBQ=36,21;MFRL=177,200;MMQ=60,60;MPOS=24;POPAF=7.30;TLOD=5.64	GT:AD:AF:DP:F1R2:F2R1:SB	0/1	44	4	0.09	48
Pre-Subject 1	chr1	27394483	27394483	C	T	GPR3	Missense_Mutation	NM_005281	exon2	c.C685T	p.L229F	SNP	exonic	GPR3	.	nonsynonymous SNV	GPR3:NM_005281:exon2:c.C685T:p.L229F	81	chr1	27394483	C	T	AS_SB_TABLE=35,44|1,1;DP=87;ECNT=1;MBQ=36,36;MFRL=250,227;MMQ=60,60;MPOS=24;POPAF=7.30;TLOD=3.17	GT:AD:AF:DP:F1R2:F2R1:SB	0/1	79	2	0.037	81
Pre-Subject 1	chr1	27549140	27549140	G	A	AHDC1	Silent	NM_001029882	exon6	c.C2976T	p.C992C	SNP	exonic	AHDC1	.	synonymous SNV	AHDC1:NM_001029882:exon6:c.C2976T:p.C992C	45	chr1	27549140	G	A	AS_SB_TABLE=18,14|5,8;DP=47;ECNT=1;MBQ=36,36;MFRL=215,217;MMQ=60,60;MPOS=10;POPAF=2.99;TLOD=34.39	GT:AD:AF:DP:F1R2:F2R1:SB	0/1	32	13	0.277	45
Pre-Subject 1	chr1	27549971	27549971	C	A	AHDC1	Silent	NM_001029882	exon6	c.G2145T	p.P715P	SNP	exonic	AHDC1	.	synonymous SNV	AHDC1:NM_001029882:exon6:c.G2145T:p.P715P	46	chr1	27549971	C	A	AS_SB_TABLE=10,13|9,14;DP=52;ECNT=1;MBQ=36,36;MFRL=185,190;MMQ=60,60;MPOS=26;PON;POPAF=0.161;TLOD=66.27	GT:AD:AF:DP:F1R2:F2R1:SB	0/1	23	23	0.502	46
Pre-Subject 1	chr1	27551101	27551101	T	G	AHDC1	Missense_Mutation	NM_001029882	exon6	c.A1015C	p.K339Q	SNP	exonic	AHDC1	.	nonsynonymous SNV	AHDC1:NM_001029882:exon6:c.A1015C:p.K339Q	59	chr1	27551101	T	G	AS_SB_TABLE=37,17|0,5;DP=59;ECNT=2;MBQ=36,14;MFRL=207,208;MMQ=60,60;MPOS=21;POPAF=7.30;TLOD=4.36	GT:AD:AF:DP:F1R2:F2R1:SB	0/1	54	5	0.079	59
Pre-Subject 1	chr1	27551112	27551112	T	G	AHDC1	Missense_Mutation	NM_001029882	exon6	c.A1004C	p.D335A	SNP	exonic	AHDC1	.	nonsynonymous SNV	AHDC1:NM_001029882:exon6:c.A1004C:p.D335A	57	chr1	27551112	T	G	AS_SB_TABLE=37,16|0,4;DP=59;ECNT=2;MBQ=36,14;MFRL=202,224;MMQ=60,60;MPOS=33;POPAF=7.30;TLOD=4.20	GT:AD:AF:DP:F1R2:F2R1:SB	0/1	53	4	0.074	57
Pre-Subject 1	chr1	27894045	27894045	T	G	RPA2	Missense_Mutation	NM_001355128	exon7	c.A407C	p.N136T	SNP	exonic	RPA2	.	nonsynonymous SNV	RPA2:NM_001355128:exon7:c.A407C:p.N136T,RPA2:NM_001286076:exon8:c.A407C:p.N136T,RPA2:NM_001297558:exon8:c.A719C:p.N240T,RPA2:NM_001355129:exon8:c.A707C:p.N236T,RPA2:NM_002946:exon8:c.A695C:p.N232T	24	chr1	27894045	T	G	AS_SB_TABLE=13,9|1,1;DP=25;ECNT=1;MBQ=36,32;MFRL=204,204;MMQ=60,60;MPOS=17;POPAF=7.30;TLOD=3.43	GT:AD:AF:DP:F1R2:F2R1:SB	0/1	22	2	0.116	24
Pre-Subject 1	chr1	28013266	28013266	T	C	EYA3	Missense_Mutation	NM_001282560	exon8	c.A476G	p.Q159R	SNP	exonic	EYA3	.	nonsynonymous SNV	EYA3:NM_001282560:exon8:c.A476G:p.Q159R,EYA3:NM_001282561:exon8:c.A476G:p.Q159R,EYA3:NM_001282562:exon8:c.A455G:p.Q152R,EYA3:NM_001990:exon9:c.A614G:p.Q205R	51	chr1	28013266	T	C	AS_SB_TABLE=17,31|1,2;DP=53;ECNT=1;MBQ=36,20;MFRL=196,143;MMQ=60,60;MPOS=5;POPAF=4.61;TLOD=4.11	GT:AD:AF:DP:F1R2:F2R1:SB	0/1	48	3	0.06	51
Pre-Subject 1	chr1	28594027	28594027	A	C	RAB42	Missense_Mutation	NM_001193532	exon2	c.A567C	p.E189D	SNP	exonic	RAB42	.	nonsynonymous SNV	RAB42:NM_001193532:exon2:c.A567C:p.E189D,RAB42:NM_152304:exon2:c.A228C:p.E76D	24	chr1	28594027	A	C	AS_SB_TABLE=11,10|0,3;DP=26;ECNT=2;MBQ=36,14;MFRL=182,237;MMQ=57,55;MPOS=17;POPAF=7.30;TLOD=4.81	GT:AD:AF:DP:F1R2:F2R1:SB	0/1	21	3	0.148	24
Pre-Subject 1	chr1	28594029	28594029	A	C	RAB42	Missense_Mutation	NM_001193532	exon2	c.A569C	p.E190A	SNP	exonic	RAB42	.	nonsynonymous SNV	RAB42:NM_001193532:exon2:c.A569C:p.E190A,RAB42:NM_152304:exon2:c.A230C:p.E77A	24	chr1	28594029	A	C	AS_SB_TABLE=11,10|0,3;DP=24;ECNT=2;MBQ=36,14;MFRL=182,237;MMQ=57,55;MPOS=15;POPAF=7.30;TLOD=4.54	GT:AD:AF:DP:F1R2:F2R1:SB	0/1	21	3	0.148	24
Pre-Subject 1	chr1	28742812	28742812	G	A	YTHDF2	Missense_Mutation	NM_001172828	exon3	c.G392A	p.G131D	SNP	exonic	YTHDF2	.	nonsynonymous SNV	YTHDF2:NM_001172828:exon3:c.G392A:p.G131D,YTHDF2:NM_016258:exon4:c.G542A:p.G181D,YTHDF2:NM_001173128:exon5:c.G542A:p.G181D	43	chr1	28742812	G	A	AS_SB_TABLE=11,30|1,1;DP=45;ECNT=1;MBQ=36,36;MFRL=219,207;MMQ=60,60;MPOS=23;POPAF=7.30;TLOD=3.98	GT:AD:AF:DP:F1R2:F2R1:SB	0/1	41	2	0.067	43
Pre-Subject 1	chr1	29033220	29033220	T	G	EPB41	Missense_Mutation	NM_203343	exon8	c.T1235G	p.F412C	SNP	exonic	EPB41	.	nonsynonymous SNV	EPB41:NM_203343:exon8:c.T1235G:p.F412C,EPB41:NM_001166005:exon9:c.T1340G:p.F447C,EPB41:NM_001166006:exon9:c.T1340G:p.F447C,EPB41:NM_001166007:exon9:c.T713G:p.F238C,EPB41:NM_004437:exon10:c.T713G:p.F238C,EPB41:NM_203342:exon10:c.T713G:p.F238C	46	chr1	29033220	T	G	AS_SB_TABLE=14,30|1,1;DP=50;ECNT=1;MBQ=36,36;MFRL=199,146;MMQ=60,60;MPOS=30;POPAF=7.30;TLOD=3.51	GT:AD:AF:DP:F1R2:F2R1:SB	0/1	44	2	0.065	46
Pre-Subject 1	chr1	29315401	29315401	T	-	PTPRU	Frame_Shift_Del	NM_001195001	exon23	c.3248delT	p.I1083Tfs*5	SNP	exonic	PTPRU	.	frameshift deletion	PTPRU:NM_001195001:exon23:c.3248delT:p.I1083Tfs*5,PTPRU:NM_133178:exon23:c.3257delT:p.I1086Tfs*5,PTPRU:NM_005704:exon24:c.3287delT:p.I1096Tfs*5,PTPRU:NM_133177:exon24:c.3275delT:p.I1092Tfs*5	62	chr1	29315400	AT	A	AS_SB_TABLE=47,8|7,0;DP=65;ECNT=1;MBQ=36,36;MFRL=200,227;MMQ=60,60;MPOS=10;POPAF=7.30;TLOD=17.53	GT:AD:AF:DP:F1R2:F2R1:SB	0/1	55	7	0.126	62
Pre-Subject 1	chr1	30735195	30735195	C	T	LAPTM5	Missense_Mutation	NM_006762	exon7	c.G677A	p.R226K	SNP	exonic	LAPTM5	.	nonsynonymous SNV	LAPTM5:NM_006762:exon7:c.G677A:p.R226K	40	chr1	30735195	C	T	AS_SB_TABLE=9,17|4,10;DP=41;ECNT=1;MBQ=36,36;MFRL=209,197;MMQ=60,60;MPOS=30;PON;POPAF=0.688;TLOD=45.32	GT:AD:AF:DP:F1R2:F2R1:SB	0/1	26	14	0.367	40
Pre-Subject 1	chr1	30933217	30933217	G	A	PUM1	Silent	NM_001020658	exon22	c.C3561T	p.I1187I	SNP	exonic	PUM1	.	synonymous SNV	PUM1:NM_001020658:exon22:c.C3561T:p.I1187I,PUM1:NM_014676:exon22:c.C3555T:p.I1185I	75	chr1	30933217	G	A	AS_SB_TABLE=39,22|7,7;DP=78;ECNT=1;MBQ=36,36;MFRL=192,185;MMQ=60,60;MPOS=17;POPAF=7.30;TLOD=39.53	GT:AD:AF:DP:F1R2:F2R1:SB	0/1	61	14	0.198	75
Pre-Subject 1	chr1	31433042	31433042	-	CAG	SERINC2	In_Frame_Ins	NM_001199037	exon9	c.1101_1102insCAG	p.Q372_V373insQ	INS	exonic	SERINC2	.	nonframeshift insertion	SERINC2:NM_001199037:exon9:c.1101_1102insCAG:p.Q372_V373insQ,SERINC2:NM_018565:exon9:c.1101_1102insCAG:p.Q372_V373insQ,SERINC2:NM_178865:exon9:c.1089_1090insCAG:p.Q368_V369insQ,SERINC2:NM_001199038:exon10:c.1116_1117insCAG:p.Q377_V378insQ,SERINC2:NM_001199039:exon10:c.924_925insCAG:p.Q313_V314insQ	39	chr1	31433042	A	ACAG	AS_SB_TABLE=0,0|27,12;DP=53;ECNT=1;MBQ=0,36;MFRL=0,206;MMQ=60,60;MPOS=20;PON;POPAF=0.091;RPA=5,6;RU=CAG;STR;TLOD=166.93	GT:AD:AF:DP:F1R2:F2R1:SB	0/1	0	39	0.979	39
Pre-Subject 1	chr1	31620963	31620963	G	A	HCRTR1	Missense_Mutation	NM_001525	exon5	c.G499A	p.G167S	SNP	exonic	HCRTR1	.	nonsynonymous SNV	HCRTR1:NM_001525:exon5:c.G499A:p.G167S	43	chr1	31620963	G	A	AS_SB_TABLE=10,12|12,9;DP=49;ECNT=2;MBQ=36,36;MFRL=176,168;MMQ=60,60;MPOS=24;POPAF=2.57;TLOD=62.33	GT:AD:AF:DP:F1R2:F2R1:SB	0/1	22	21	0.483	43
Pre-Subject 1	chr1	31621018	31621018	G	A	HCRTR1	Missense_Mutation	NM_001525	exon5	c.G554A	p.C185Y	SNP	exonic	HCRTR1	.	nonsynonymous SNV	HCRTR1:NM_001525:exon5:c.G554A:p.C185Y	36	chr1	31621018	G	A	AS_SB_TABLE=6,28|1,1;DP=38;ECNT=2;MBQ=36,34;MFRL=196,175;MMQ=60,60;MPOS=17;POPAF=7.30;TLOD=3.42	GT:AD:AF:DP:F1R2:F2R1:SB	0/1	34	2	0.081	36
Pre-Subject 1	chr1	31790731	31790731	T	G	SPOCD1	Missense_Mutation	NM_001281988	exon15	c.A1963C	p.I655L	SNP	exonic	SPOCD1	.	nonsynonymous SNV	SPOCD1:NM_001281988:exon15:c.A1963C:p.I655L,SPOCD1:NM_001281987:exon16:c.A3484C:p.I1162L,SPOCD1:NM_144569:exon16:c.A3523C:p.I1175L	60	chr1	31790731	T	G	AS_SB_TABLE=35,18|0,7;DP=63;ECNT=3;MBQ=36,14;MFRL=189,176;MMQ=60,60;MPOS=10;POPAF=7.30;TLOD=5.11	GT:AD:AF:DP:F1R2:F2R1:SB	0/1	53	7	0.119	60
Pre-Subject 1	chr1	31790737	31790737	T	G	SPOCD1	Missense_Mutation	NM_001281988	exon15	c.A1957C	p.S653R	SNP	exonic	SPOCD1	.	nonsynonymous SNV	SPOCD1:NM_001281988:exon15:c.A1957C:p.S653R,SPOCD1:NM_001281987:exon16:c.A3478C:p.S1160R,SPOCD1:NM_144569:exon16:c.A3517C:p.S1173R	66	chr1	31790737	T	G	AS_SB_TABLE=38,18|0,10;DP=69;ECNT=3;MBQ=36,14;MFRL=188,186;MMQ=60,60;MPOS=17;POPAF=7.30;TLOD=6.15	GT:AD:AF:DP:F1R2:F2R1:SB	0/1	56	10	0.108	66
Pre-Subject 1	chr1	31790743	31790743	T	G	SPOCD1	Missense_Mutation	NM_001281988	exon15	c.A1951C	p.T651P	SNP	exonic	SPOCD1	.	nonsynonymous SNV	SPOCD1:NM_001281988:exon15:c.A1951C:p.T651P,SPOCD1:NM_001281987:exon16:c.A3472C:p.T1158P,SPOCD1:NM_144569:exon16:c.A3511C:p.T1171P	70	chr1	31790743	T	G	AS_SB_TABLE=41,22|0,7;DP=73;ECNT=3;MBQ=36,14;MFRL=181,176;MMQ=60,60;MPOS=22;POPAF=7.30;TLOD=8.67	GT:AD:AF:DP:F1R2:F2R1:SB	0/1	63	7	0.104	70
Pre-Subject 1	chr1	32181257	32181257	-	GGCTCAGTCTGG	TXLNA	In_Frame_Ins	NM_175852	exon3	c.185_186insGGCTCAGTCTGG	p.A67_L68insQSGA	INS	exonic	TXLNA	.	nonframeshift insertion	TXLNA:NM_175852:exon3:c.185_186insGGCTCAGTCTGG:p.A67_L68insQSGA	34	chr1	32181257	C	CGGCTCAGTCTGG	AS_SB_TABLE=3,11|6,14;DP=46;ECNT=1;MBQ=36,36;MFRL=197,227;MMQ=60,60;MPOS=24;POPAF=3.53;RPA=1,2;RU=GGCTCAGTCTGG;STR;TLOD=79.28	GT:AD:AF:DP:F1R2:F2R1:SB	0/1	14	20	0.577	34
Pre-Subject 1	chr1	32275079	32275079	G	A	LCK	Missense_Mutation	NM_001042771	exon4	c.G274A	p.E92K	SNP	exonic	LCK	.	nonsynonymous SNV	LCK:NM_001042771:exon4:c.G274A:p.E92K,LCK:NM_001330468:exon4:c.G274A:p.E92K,LCK:NM_005356:exon4:c.G274A:p.E92K	31	chr1	32275079	G	A	AS_SB_TABLE=5,24|0,2;DP=35;ECNT=1;MBQ=36,36;MFRL=211,184;MMQ=60,60;MPOS=31;POPAF=7.30;TLOD=4.01	GT:AD:AF:DP:F1R2:F2R1:SB	0/1	29	2	0.093	31
Pre-Subject 1	chr1	32334776	32334776	C	T	MARCKSL1	Missense_Mutation	NM_023009	exon2	c.G409A	p.E137K	SNP	exonic	MARCKSL1	.	nonsynonymous SNV	MARCKSL1:NM_023009:exon2:c.G409A:p.E137K	34	chr1	32334776	C	T	AS_SB_TABLE=16,15|0,3;DP=35;ECNT=1;MBQ=36,36;MFRL=246,326;MMQ=60,60;MPOS=28;POPAF=7.30;TLOD=7.33	GT:AD:AF:DP:F1R2:F2R1:SB	0/1	31	3	0.111	34
Pre-Subject 1	chr1	32765802	32765802	G	T	KIAA1522	Silent	NM_001198972	exon1	c.G33T	p.A11A	SNP	exonic	KIAA1522	.	synonymous SNV	KIAA1522:NM_001198972:exon1:c.G33T:p.A11A,KIAA1522:NM_001198973:exon1:c.G33T:p.A11A	58	chr1	32765802	G	T	AS_SB_TABLE=19,19|10,10;DP=64;ECNT=1;MBQ=36,36;MFRL=177,168;MMQ=60,60;MPOS=16;PON;POPAF=0.810;TLOD=56.79	GT:AD:AF:DP:F1R2:F2R1:SB	0/1	38	20	0.348	58
Pre-Subject 1	chr1	32772284	32772284	A	C	KIAA1522	Silent	NM_001198972	exon6	c.A2928C	p.P976P	SNP	exonic	KIAA1522	.	synonymous SNV	KIAA1522:NM_001198972:exon6:c.A2928C:p.P976P,KIAA1522:NM_001369553:exon6:c.A2961C:p.P987P,KIAA1522:NM_020888:exon6:c.A3105C:p.P1035P	34	chr1	32772284	A	C	AS_SB_TABLE=1,28|5,0;DP=36;ECNT=4;MBQ=36,14;MFRL=202,206;MMQ=60,60;MPOS=14;POPAF=2.10;TLOD=12.00	GT:AD:AF:DP:F1R2:F2R1:PGT:PID:PS:SB	0|1	29	5	0.138	34
Pre-Subject 1	chr1	32772288	32772288	G	C	KIAA1522	Missense_Mutation	NM_001198972	exon6	c.G2932C	p.A978P	SNP	exonic	KIAA1522	.	nonsynonymous SNV	KIAA1522:NM_001198972:exon6:c.G2932C:p.A978P,KIAA1522:NM_001369553:exon6:c.G2965C:p.A989P,KIAA1522:NM_020888:exon6:c.G3109C:p.A1037P	36	chr1	32772288	G	C	AS_SB_TABLE=3,28|5,0;DP=37;ECNT=4;MBQ=36,32;MFRL=202,206;MMQ=60,60;MPOS=10;POPAF=2.25;TLOD=11.88	GT:AD:AF:DP:F1R2:F2R1:PGT:PID:PS:SB	0|1	31	5	0.131	36
Pre-Subject 1	chr1	32772291	32772291	T	C	KIAA1522	Missense_Mutation	NM_001198972	exon6	c.T2935C	p.S979P	SNP	exonic	KIAA1522	.	nonsynonymous SNV	KIAA1522:NM_001198972:exon6:c.T2935C:p.S979P,KIAA1522:NM_001369553:exon6:c.T2968C:p.S990P,KIAA1522:NM_020888:exon6:c.T3112C:p.S1038P	38	chr1	32772291	T	C	AS_SB_TABLE=4,28|6,0;DP=38;ECNT=4;MBQ=36,14;MFRL=206,204;MMQ=60,60;MPOS=7;POPAF=2.40;TLOD=15.21	GT:AD:AF:DP:F1R2:F2R1:SB	0/1	32	6	0.15	38
Pre-Subject 1	chr1	32772297	32772301	AGTTA	-	KIAA1522	Frame_Shift_Del	NM_001198972	exon6	c.2941_2945del	p.S981Pfs*4	DEL	exonic	KIAA1522	.	frameshift deletion	KIAA1522:NM_001198972:exon6:c.2941_2945del:p.S981Pfs*4,KIAA1522:NM_001369553:exon6:c.2974_2978del:p.S992Pfs*4,KIAA1522:NM_020888:exon6:c.3118_3122del:p.S1040Pfs*4	43	chr1	32772296	CAGTTA	C	AS_SB_TABLE=10,29|4,0;DP=43;ECNT=4;MBQ=36,32;MFRL=199,224;MMQ=60,60;MPOS=2;POPAF=3.65;TLOD=11.32	GT:AD:AF:DP:F1R2:F2R1:PGT:PID:PS:SB	0|1	39	4	0.113	43
Pre-Subject 1	chr1	32936913	32936913	T	G	RNF19B	Missense_Mutation	NM_001300826	exon9	c.A2089C	p.T697P	SNP	exonic	RNF19B	.	nonsynonymous SNV	RNF19B:NM_001300826:exon9:c.A2089C:p.T697P,RNF19B:NM_153341:exon9:c.A2092C:p.T698P	70	chr1	32936913	T	G	AS_SB_TABLE=24,34|1,11;DP=78;ECNT=2;MBQ=34,14;MFRL=214,247;MMQ=60,60;MPOS=12;POPAF=7.30;TLOD=6.32	GT:AD:AF:DP:F1R2:F2R1:SB	0/1	58	12	0.129	70
Pre-Subject 1	chr1	32936937	32936937	A	C	RNF19B	Missense_Mutation	NM_001300826	exon9	c.T2065G	p.S689A	SNP	exonic	RNF19B	.	nonsynonymous SNV	RNF19B:NM_001300826:exon9:c.T2065G:p.S689A,RNF19B:NM_153341:exon9:c.T2068G:p.S690A	63	chr1	32936937	A	C	AS_SB_TABLE=18,31|0,14;DP=70;ECNT=2;MBQ=32,14;MFRL=218,288;MMQ=60,60;MPOS=13;POPAF=7.30;TLOD=9.54	GT:AD:AF:DP:F1R2:F2R1:SB	0/1	49	14	0.185	63
Pre-Subject 1	chr1	33307417	33307417	C	A	A3GALT2	Silent	NM_001080438	exon5	c.G372T	p.T124T	SNP	exonic	A3GALT2	.	synonymous SNV	A3GALT2:NM_001080438:exon5:c.G372T:p.T124T	55	chr1	33307417	C	A	AS_SB_TABLE=15,38|0,2;DP=55;ECNT=1;MBQ=36,36;MFRL=173,390;MMQ=60,60;MPOS=20;POPAF=7.30;TLOD=3.28	GT:AD:AF:DP:F1R2:F2R1:SB	0/1	53	2	0.054	55
Pre-Subject 1	chr1	33864536	33864536	C	A	HMGB4	Missense_Mutation	NM_001352984	exon2	c.C123A	p.N41K	SNP	exonic	HMGB4	.	nonsynonymous SNV	HMGB4:NM_001352984:exon2:c.C123A:p.N41K,HMGB4:NM_145205:exon2:c.C345A:p.N115K	69	chr1	33864536	C	A	AS_SB_TABLE=13,20|15,21;DP=70;ECNT=1;MBQ=36,36;MFRL=199,206;MMQ=60,60;MPOS=16;POPAF=2.10;TLOD=110.69	GT:AD:AF:DP:F1R2:F2R1:SB	0/1	33	36	0.536	69
Pre-Subject 1	chr1	35030558	35030558	C	G	ZMYM6	Missense_Mutation	NM_007167	exon2	c.G82C	p.D28H	SNP	exonic	ZMYM6	.	nonsynonymous SNV	ZMYM6:NM_007167:exon2:c.G82C:p.D28H	48	chr1	35030558	C	G	AS_SB_TABLE=28,3|15,2;DP=53;ECNT=1;MBQ=36,36;MFRL=231,191;MMQ=60,60;MPOS=10;POPAF=3.46;TLOD=51.18	GT:AD:AF:DP:F1R2:F2R1:SB	0/1	31	17	0.355	48
Pre-Subject 1	chr1	36088072	36088072	A	G	TEKT2	Silent	NM_014466	exon10	c.A1179G	p.T393T	SNP	exonic	TEKT2	.	synonymous SNV	TEKT2:NM_014466:exon10:c.A1179G:p.T393T	46	chr1	36088072	A	G	AS_SB_TABLE=0,0|27,19;DP=47;ECNT=1;MBQ=0,36;MFRL=0,202;MMQ=60,60;MPOS=15;PON;POPAF=0.035;TLOD=172.36	GT:AD:AF:DP:F1R2:F2R1:SB	0/1	0	46	0.979	46
Pre-Subject 1	chr1	36171061	36171061	A	C	MAP7D1	Missense_Mutation	NM_001286365	exon2	c.A137C	p.D46A	SNP	exonic	MAP7D1	.	nonsynonymous SNV	MAP7D1:NM_001286365:exon2:c.A137C:p.D46A,MAP7D1:NM_001286366:exon2:c.A137C:p.D46A,MAP7D1:NM_018067:exon2:c.A137C:p.D46A	28	chr1	36171061	A	C	AS_SB_TABLE=8,17|3,0;DP=28;ECNT=3;MBQ=36,14;MFRL=192,175;MMQ=60,60;MPOS=26;POPAF=7.30;TLOD=6.86	GT:AD:AF:DP:F1R2:F2R1:SB	0/1	25	3	0.134	28
Pre-Subject 1	chr1	36171073	36171073	A	C	MAP7D1	Missense_Mutation	NM_001286365	exon2	c.A149C	p.D50A	SNP	exonic	MAP7D1	.	nonsynonymous SNV	MAP7D1:NM_001286365:exon2:c.A149C:p.D50A,MAP7D1:NM_001286366:exon2:c.A149C:p.D50A,MAP7D1:NM_018067:exon2:c.A149C:p.D50A	37	chr1	36171073	A	C	AS_SB_TABLE=14,20|3,0;DP=38;ECNT=3;MBQ=36,14;MFRL=178,175;MMQ=60,60;MPOS=33;POPAF=7.30;TLOD=4.77	GT:AD:AF:DP:F1R2:F2R1:SB	0/1	34	3	0.103	37
Pre-Subject 1	chr1	36171075	36171075	A	C	MAP7D1	Missense_Mutation	NM_001286365	exon2	c.A151C	p.T51P	SNP	exonic	MAP7D1	.	nonsynonymous SNV	MAP7D1:NM_001286365:exon2:c.A151C:p.T51P,MAP7D1:NM_001286366:exon2:c.A151C:p.T51P,MAP7D1:NM_018067:exon2:c.A151C:p.T51P	36	chr1	36171075	A	C	AS_SB_TABLE=14,19|3,0;DP=38;ECNT=3;MBQ=36,21;MFRL=176,175;MMQ=60,60;MPOS=33;POPAF=7.30;TLOD=7.36	GT:AD:AF:DP:F1R2:F2R1:SB	0/1	33	3	0.106	36
Pre-Subject 1	chr1	36455807	36455807	G	A	MRPS15	Missense_Mutation	NM_031280	exon8	c.C755T	p.T252I	SNP	exonic	MRPS15	.	nonsynonymous SNV	MRPS15:NM_031280:exon8:c.C755T:p.T252I	48	chr1	36455807	G	A	AS_SB_TABLE=11,11|14,12;DP=48;ECNT=1;MBQ=36,36;MFRL=217,180;MMQ=60,60;MPOS=24;POPAF=2.12;TLOD=90.03	GT:AD:AF:DP:F1R2:F2R1:SB	0/1	22	26	0.54	48
Pre-Subject 1	chr1	36819823	36819823	G	T	GRIK3	Missense_Mutation	NM_000831	exon12	c.C1786A	p.P596T	SNP	exonic	GRIK3	.	nonsynonymous SNV	GRIK3:NM_000831:exon12:c.C1786A:p.P596T	67	chr1	36819823	G	T	AS_SB_TABLE=25,38|1,3;DP=71;ECNT=1;MBQ=36,36;MFRL=174,196;MMQ=60,60;MPOS=26;POPAF=7.30;TLOD=7.55	GT:AD:AF:DP:F1R2:F2R1:SB	0/1	63	4	0.078	67
Pre-Subject 1	chr1	37613812	37613812	C	T	RSPO1	Missense_Mutation	NM_001242908	exon6	c.G517A	p.E173K	SNP	exonic	RSPO1	.	nonsynonymous SNV	RSPO1:NM_001242908:exon6:c.G517A:p.E173K,RSPO1:NM_001242909:exon6:c.G436A:p.E146K,RSPO1:NM_001038633:exon7:c.G517A:p.E173K	31	chr1	37613812	C	T	AS_SB_TABLE=13,14|3,1;DP=32;ECNT=2;MBQ=36,36;MFRL=209,178;MMQ=60,60;MPOS=25;POPAF=4.31;TLOD=10.28	GT:AD:AF:DP:F1R2:F2R1:SB	0/1	27	4	0.151	31
Pre-Subject 1	chr1	37613845	37613845	T	G	RSPO1	Missense_Mutation	NM_001242908	exon6	c.A484C	p.K162Q	SNP	exonic	RSPO1	.	nonsynonymous SNV	RSPO1:NM_001242908:exon6:c.A484C:p.K162Q,RSPO1:NM_001242909:exon6:c.A403C:p.K135Q,RSPO1:NM_001038633:exon7:c.A484C:p.K162Q	29	chr1	37613845	T	G	AS_SB_TABLE=5,8|11,5;DP=32;ECNT=2;MBQ=36,36;MFRL=220,190;MMQ=60,60;MPOS=15;PON;POPAF=1.41;TLOD=50.46	GT:AD:AF:DP:F1R2:F2R1:SB	0/1	13	16	0.572	29
Pre-Subject 1	chr1	37943807	37943807	G	A	INPP5B	Missense_Mutation	NM_001365820	exon4	c.C239T	p.T80M	SNP	exonic	INPP5B	.	nonsynonymous SNV	INPP5B:NM_001365820:exon4:c.C239T:p.T80M,INPP5B:NM_001365821:exon4:c.C239T:p.T80M,INPP5B:NM_005540:exon4:c.C239T:p.T80M	29	chr1	37943807	G	A	AS_SB_TABLE=11,5|5,8;DP=32;ECNT=1;MBQ=36,36;MFRL=227,243;MMQ=60,60;MPOS=23;POPAF=7.30;TLOD=38.89	GT:AD:AF:DP:F1R2:F2R1:SB	0/1	16	13	0.447	29
Pre-Subject 1	chr1	39309631	39309631	A	G	MACF1	Missense_Mutation	NM_012090	exon23	c.A2866G	p.S956G	SNP	exonic	MACF1	.	nonsynonymous SNV	MACF1:NM_012090:exon23:c.A2866G:p.S956G	40	chr1	39309631	A	G	AS_SB_TABLE=14,14|7,5;DP=44;ECNT=1;MBQ=36,36;MFRL=190,199;MMQ=60,60;MPOS=20;POPAF=2.58;TLOD=36.98	GT:AD:AF:DP:F1R2:F2R1:SB	0/1	28	12	0.313	40
Pre-Subject 1	chr1	40237690	40237690	T	C	RLF	Silent	NM_012421	exon8	c.T2988C	p.S996S	SNP	exonic	RLF	.	synonymous SNV	RLF:NM_012421:exon8:c.T2988C:p.S996S	53	chr1	40237690	T	C	AS_SB_TABLE=15,14|12,12;DP=54;ECNT=1;MBQ=36,36;MFRL=204,219;MMQ=60,60;MPOS=11;POPAF=3.40;TLOD=72.88	GT:AD:AF:DP:F1R2:F2R1:SB	0/1	29	24	0.452	53
Pre-Subject 1	chr1	40303545	40303545	C	G	COL9A2	Silent	NM_001852	exon28	c.G1533C	p.G511G	SNP	exonic	COL9A2	.	synonymous SNV	COL9A2:NM_001852:exon28:c.G1533C:p.G511G	40	chr1	40303545	C	G	AS_SB_TABLE=11,23|2,4;DP=43;ECNT=1;MBQ=36,36;MFRL=177,202;MMQ=60,60;MPOS=9;POPAF=7.30;TLOD=16.07	GT:AD:AF:DP:F1R2:F2R1:SB	0/1	34	6	0.17	40
Pre-Subject 1	chr1	41511204	41511204	T	G	HIVEP3	Silent	NM_001127714	exon8	c.A6465C	p.R2155R	SNP	exonic	HIVEP3	.	synonymous SNV	HIVEP3:NM_001127714:exon8:c.A6465C:p.R2155R,HIVEP3:NM_024503:exon9:c.A6468C:p.R2156R	52	chr1	41511204	T	G	AS_SB_TABLE=5,41|0,6;DP=54;ECNT=1;MBQ=32,18;MFRL=192,217;MMQ=60,60;MPOS=9;POPAF=7.30;TLOD=6.23	GT:AD:AF:DP:F1R2:F2R1:SB	0/1	46	6	0.116	52
Pre-Subject 1	chr1	41583137	41583137	T	G	HIVEP3	Missense_Mutation	NM_001127714	exon3	c.A1661C	p.H554P	SNP	exonic	HIVEP3	.	nonsynonymous SNV	HIVEP3:NM_001127714:exon3:c.A1661C:p.H554P,HIVEP3:NM_024503:exon4:c.A1661C:p.H554P	27	chr1	41583137	T	G	AS_SB_TABLE=14,10|0,3;DP=30;ECNT=1;MBQ=34,14;MFRL=229,231;MMQ=60,60;MPOS=29;POPAF=7.30;TLOD=4.49	GT:AD:AF:DP:F1R2:F2R1:SB	0/1	24	3	0.123	27
Pre-Subject 1	chr1	42747015	42747015	C	T	P3H1	Missense_Mutation	NM_001243246	exon14	c.G2312A	p.G771D	SNP	exonic	P3H1	.	nonsynonymous SNV	P3H1:NM_001243246:exon14:c.G2312A:p.G771D	24	chr1	42747015	C	T	AS_SB_TABLE=3,7|8,6;DP=28;ECNT=1;MBQ=36,34;MFRL=228,199;MMQ=60,60;MPOS=28;POPAF=7.30;TLOD=40.07	GT:AD:AF:DP:F1R2:F2R1:SB	0/1	10	14	0.571	24
Pre-Subject 1	chr1	43209986	43209986	A	G	CFAP57	Missense_Mutation	NM_001167965	exon11	c.A1999G	p.T667A	SNP	exonic	CFAP57	.	nonsynonymous SNV	CFAP57:NM_001167965:exon11:c.A1999G:p.T667A,CFAP57:NM_152498:exon11:c.A1999G:p.T667A	65	chr1	43209986	A	G	AS_SB_TABLE=11,22|14,18;DP=65;ECNT=1;MBQ=36,36;MFRL=201,190;MMQ=60,60;MPOS=18;POPAF=2.32;TLOD=101.22	GT:AD:AF:DP:F1R2:F2R1:SB	0/1	33	32	0.511	65
Pre-Subject 1	chr1	43273158	43273158	G	A	TMEM125	Missense_Mutation	NM_001320244	exon4	c.G436A	p.A146T	SNP	exonic	TMEM125	.	nonsynonymous SNV	TMEM125:NM_001320244:exon4:c.G436A:p.A146T,TMEM125:NM_144626:exon4:c.G436A:p.A146T	38	chr1	43273158	G	A	AS_SB_TABLE=12,11|9,6;DP=40;ECNT=1;MBQ=36,36;MFRL=190,177;MMQ=60,60;MPOS=17;POPAF=2.05;TLOD=36.68	GT:AD:AF:DP:F1R2:F2R1:SB	0/1	23	15	0.382	38
Pre-Subject 1	chr1	43981841	43981841	C	T	B4GALT2	Missense_Mutation	NM_001005417	exon3	c.C466T	p.H156Y	SNP	exonic	B4GALT2	.	nonsynonymous SNV	B4GALT2:NM_001005417:exon3:c.C466T:p.H156Y,B4GALT2:NM_003780:exon3:c.C466T:p.H156Y,B4GALT2:NM_030587:exon3:c.C553T:p.H185Y	131	chr1	43981841	C	T	AS_SB_TABLE=72,57|0,2;DP=143;ECNT=6;MBQ=36,14;MFRL=191,103;MMQ=60,60;MPOS=37;POPAF=7.30;TLOD=3.51	GT:AD:AF:DP:F1R2:F2R1:SB	0/1	129	2	0.022	131
Pre-Subject 1	chr1	43981854	43981854	A	T	B4GALT2	Missense_Mutation	NM_001005417	exon3	c.A479T	p.Y160F	SNP	exonic	B4GALT2	.	nonsynonymous SNV	B4GALT2:NM_001005417:exon3:c.A479T:p.Y160F,B4GALT2:NM_003780:exon3:c.A479T:p.Y160F,B4GALT2:NM_030587:exon3:c.A566T:p.Y189F	145	chr1	43981854	A	T	AS_SB_TABLE=72,67|0,6;DP=152;ECNT=6;MBQ=36,14;MFRL=197,158;MMQ=60,60;MPOS=24;POPAF=7.30;TLOD=5.19	GT:AD:AF:DP:F1R2:F2R1:SB	0/1	139	6	0.039	145
Pre-Subject 1	chr1	43981857	43981857	G	T	B4GALT2	Missense_Mutation	NM_001005417	exon3	c.G482T	p.W161L	SNP	exonic	B4GALT2	.	nonsynonymous SNV	B4GALT2:NM_001005417:exon3:c.G482T:p.W161L,B4GALT2:NM_003780:exon3:c.G482T:p.W161L,B4GALT2:NM_030587:exon3:c.G569T:p.W190L	147	chr1	43981857	G	T	AS_SB_TABLE=70,68|0,9;DP=153;ECNT=6;MBQ=36,32;MFRL=196,171;MMQ=60,60;MPOS=22;POPAF=7.30;TLOD=15.00	GT:AD:AF:DP:F1R2:F2R1:SB	0/1	138	9	0.055	147
Pre-Subject 1	chr1	43985562	43985562	C	T	B4GALT2	Silent	NM_001005417	exon6	c.C909T	p.I303I	SNP	exonic	B4GALT2	.	synonymous SNV	B4GALT2:NM_001005417:exon6:c.C909T:p.I303I,B4GALT2:NM_003780:exon6:c.C909T:p.I303I,B4GALT2:NM_030587:exon6:c.C996T:p.I332I	26	chr1	43985562	C	T	AS_SB_TABLE=10,8|7,1;DP=26;ECNT=1;MBQ=34,36;MFRL=136,216;MMQ=60,60;MPOS=25;PON;POPAF=1.06;TLOD=22.96	GT:AD:AF:DP:F1R2:F2R1:SB	0/1	18	8	0.347	26
Pre-Subject 1	chr1	44130708	44130710	CAA	-	KLF17	In_Frame_Del	NM_173484	exon3	c.1122_1124del	p.N378del	DEL	exonic	KLF17	.	nonframeshift deletion	KLF17:NM_173484:exon3:c.1122_1124del:p.N378del	49	chr1	44130707	CCAA	C	AS_SB_TABLE=7,19|7,16;DP=57;ECNT=1;MBQ=36,36;MFRL=178,186;MMQ=60,60;MPOS=18;PON;POPAF=0.767;RPA=4,3;RU=CAA;STR;TLOD=85.77	GT:AD:AF:DP:F1R2:F2R1:SB	0/1	26	23	0.473	49
Pre-Subject 1	chr1	44354951	44354951	C	G	ERI3	Missense_Mutation	NM_024066	exon1	c.G76C	p.A26P	SNP	exonic	ERI3	.	nonsynonymous SNV	ERI3:NM_024066:exon1:c.G76C:p.A26P	27	chr1	44354951	C	G	AS_SB_TABLE=8,15|0,4;DP=28;ECNT=1;MBQ=32,23;MFRL=196,233;MMQ=60,60;MPOS=9;POPAF=7.30;TLOD=3.33	GT:AD:AF:DP:F1R2:F2R1:SB	0/1	23	4	0.131	27
Pre-Subject 1	chr1	45060143	45060143	C	T	ZSWIM5	Missense_Mutation	NM_020883	exon3	c.G1057A	p.G353S	SNP	exonic	ZSWIM5	.	nonsynonymous SNV	ZSWIM5:NM_020883:exon3:c.G1057A:p.G353S	41	chr1	45060143	C	T	AS_SB_TABLE=11,13|8,9;DP=44;ECNT=1;MBQ=36,36;MFRL=210,202;MMQ=60,60;MPOS=13;POPAF=3.21;TLOD=56.56	GT:AD:AF:DP:F1R2:F2R1:SB	0/1	24	17	0.422	41
Pre-Subject 1	chr1	46055817	46055817	T	A	LOC110117498-PIK3R3	Nonsense_Mutation	NM_001328654	exon5	c.A451T	p.K151X	SNP	exonic	LOC110117498-PIK3R3;PIK3R3	.	stopgain	PIK3R3:NM_001328654:exon5:c.A451T:p.K151X,PIK3R3:NM_001328653:exon6:c.A676T:p.K226X,LOC110117498-PIK3R3:NM_001303427:exon7:c.A1057T:p.K353X,PIK3R3:NM_001328648:exon7:c.A787T:p.K263X,PIK3R3:NM_001328649:exon7:c.A787T:p.K263X,PIK3R3:NM_001328650:exon7:c.A787T:p.K263X,PIK3R3:NM_001328651:exon7:c.A787T:p.K263X,PIK3R3:NM_001328652:exon7:c.A919T:p.K307X,PIK3R3:NM_003629:exon7:c.A919T:p.K307X,PIK3R3:NM_…	37	chr1	46055817	T	A	AS_SB_TABLE=18,15|4,0;DP=37;ECNT=4;MBQ=36,36;MFRL=180,147;MMQ=60,60;MPOS=28;POPAF=7.30;TLOD=8.11	GT:AD:AF:DP:F1R2:F2R1:PGT:PID:PS:SB	0|1	33	4	0.108	37
Pre-Subject 1	chr1	46055820	46055820	G	C	LOC110117498-PIK3R3	Missense_Mutation	NM_001328654	exon5	c.C448G	p.R150G	SNP	exonic	LOC110117498-PIK3R3;PIK3R3	.	nonsynonymous SNV	PIK3R3:NM_001328654:exon5:c.C448G:p.R150G,PIK3R3:NM_001328653:exon6:c.C673G:p.R225G,LOC110117498-PIK3R3:NM_001303427:exon7:c.C1054G:p.R352G,PIK3R3:NM_001328648:exon7:c.C784G:p.R262G,PIK3R3:NM_001328649:exon7:c.C784G:p.R262G,PIK3R3:NM_001328650:exon7:c.C784G:p.R262G,PIK3R3:NM_001328651:exon7:c.C784G:p.R262G,PIK3R3:NM_001328652:exon7:c.C916G:p.R306G,PIK3R3:NM_003629:exon7:c.C916G:p.R306G,PIK3R3:NM_…	37	chr1	46055820	G	C	AS_SB_TABLE=18,15|4,0;DP=37;ECNT=4;MBQ=36,36;MFRL=180,147;MMQ=60,60;MPOS=28;POPAF=7.30;TLOD=8.11	GT:AD:AF:DP:F1R2:F2R1:PGT:PID:PS:SB	0|1	33	4	0.108	37
Pre-Subject 1	chr1	46055823	46055827	GCTGG	-	LOC110117498-PIK3R3	Frame_Shift_Del	NM_001328654	exon5	c.441_445del	p.Q148Afs*28	DEL	exonic	LOC110117498-PIK3R3;PIK3R3	.	frameshift deletion	PIK3R3:NM_001328654:exon5:c.441_445del:p.Q148Afs*28,PIK3R3:NM_001328653:exon6:c.666_670del:p.Q223Afs*28,LOC110117498-PIK3R3:NM_001303427:exon7:c.1047_1051del:p.Q350Afs*28,PIK3R3:NM_001328648:exon7:c.777_781del:p.Q260Afs*28,PIK3R3:NM_001328649:exon7:c.777_781del:p.Q260Afs*28,PIK3R3:NM_001328650:exon7:c.777_781del:p.Q260Afs*28,PIK3R3:NM_001328651:exon7:c.777_781del:p.Q260Afs*28,PIK3R3:NM_001328652:…	38	chr1	46055822	AGCTGG	A	AS_SB_TABLE=19,16|3,0;DP=39;ECNT=4;MBQ=36,14;MFRL=180,107;MMQ=60,60;MPOS=31;POPAF=7.30;TLOD=4.87	GT:AD:AF:DP:F1R2:F2R1:PGT:PID:PS:SB	0|1	35	3	0.078	38
Pre-Subject 1	chr1	46055845	46055845	G	A	LOC110117498-PIK3R3	Silent	NM_001328654	exon5	c.C423T	p.S141S	SNP	exonic	LOC110117498-PIK3R3;PIK3R3	.	synonymous SNV	PIK3R3:NM_001328654:exon5:c.C423T:p.S141S,PIK3R3:NM_001328653:exon6:c.C648T:p.S216S,LOC110117498-PIK3R3:NM_001303427:exon7:c.C1029T:p.S343S,PIK3R3:NM_001328648:exon7:c.C759T:p.S253S,PIK3R3:NM_001328649:exon7:c.C759T:p.S253S,PIK3R3:NM_001328650:exon7:c.C759T:p.S253S,PIK3R3:NM_001328651:exon7:c.C759T:p.S253S,PIK3R3:NM_001328652:exon7:c.C891T:p.S297S,PIK3R3:NM_003629:exon7:c.C891T:p.S297S,PIK3R3:NM_…	35	chr1	46055845	G	A	AS_SB_TABLE=14,10|6,5;DP=36;ECNT=4;MBQ=36,36;MFRL=179,180;MMQ=60,60;MPOS=18;PON;POPAF=0.167;TLOD=33.88	GT:AD:AF:DP:F1R2:F2R1:SB	0/1	24	11	0.325	35
Pre-Subject 1	chr1	46716297	46716297	G	T	EFCAB14	Missense_Mutation	NM_014774	exon2	c.C332A	p.T111K	SNP	exonic	EFCAB14	.	nonsynonymous SNV	EFCAB14:NM_014774:exon2:c.C332A:p.T111K	42	chr1	46716297	G	T	AS_SB_TABLE=40,0|2,0;DP=43;ECNT=2;MBQ=36,14;MFRL=211,322;MMQ=60,47;MPOS=3;POPAF=7.30;TLOD=4.41	GT:AD:AF:DP:F1R2:F2R1:PGT:PID:PS:SB	0|1	40	2	0.067	42
Pre-Subject 1	chr1	47225885	47225885	T	G	TAL1	Missense_Mutation	NM_001287347	exon3	c.A4C	p.T2P	SNP	exonic	TAL1	.	nonsynonymous SNV	TAL1:NM_001287347:exon3:c.A4C:p.T2P,TAL1:NM_001290403:exon3:c.A4C:p.T2P,TAL1:NM_001290405:exon3:c.A4C:p.T2P,TAL1:NM_001290404:exon4:c.A4C:p.T2P,TAL1:NM_003189:exon4:c.A4C:p.T2P	22	chr1	47225885	T	G	AS_SB_TABLE=7,12|3,0;DP=22;ECNT=2;MBQ=36,14;MFRL=168,237;MMQ=60,60;MPOS=19;POPAF=7.30;TLOD=5.69	GT:AD:AF:DP:F1R2:F2R1:SB	0/1	19	3	0.16	22
Pre-Subject 1	chr1	47416698	47416698	G	A	FOXE3	Missense_Mutation	NM_012186	exon1	c.G383A	p.C128Y	SNP	exonic	FOXE3	.	nonsynonymous SNV	FOXE3:NM_012186:exon1:c.G383A:p.C128Y	39	chr1	47416698	G	A	AS_SB_TABLE=11,26|0,2;DP=40;ECNT=1;MBQ=36,34;MFRL=185,161;MMQ=60,60;MPOS=4;POPAF=7.30;TLOD=3.27	GT:AD:AF:DP:F1R2:F2R1:SB	0/1	37	2	0.073	39
Pre-Subject 1	chr1	48758912	48758912	G	T	BEND5	Silent	NM_001349793	exon2	c.C226A	p.R76R	SNP	exonic	BEND5	.	synonymous SNV	BEND5:NM_001349793:exon2:c.C226A:p.R76R,BEND5:NM_001302082:exon3:c.C226A:p.R76R,BEND5:NM_024603:exon3:c.C733A:p.R245R,BEND5:NM_001349794:exon4:c.C226A:p.R76R,BEND5:NM_001349795:exon5:c.C478A:p.R160R	21	chr1	48758912	G	T	AS_SB_TABLE=0,0|10,11;DP=22;ECNT=1;MBQ=0,36;MFRL=0,232;MMQ=60,60;MPOS=13;PON;POPAF=0.096;TLOD=78.67	GT:AD:AF:DP:F1R2:F2R1:SB	0/1	0	21	0.955	21
Pre-Subject 1	chr1	51840392	51840394	TCT	-	NRDC	In_Frame_Del	NM_001101662	exon2	c.462_464del	p.E154del	DEL	exonic	NRDC	.	nonframeshift deletion	NRDC:NM_001101662:exon2:c.462_464del:p.E154del,NRDC:NM_001242361:exon2:c.66_68del:p.E22del,NRDC:NM_002525:exon2:c.462_464del:p.E154del	33	chr1	51840391	ATCT	A	AS_SB_TABLE=0,0|15,18;DP=48;ECNT=1;MBQ=0,36;MFRL=0,216;MMQ=60,60;MPOS=22;PON;POPAF=0.292;RPA=4,3;RU=TCT;STR;TLOD=141.98	GT:AD:AF:DP:F1R2:F2R1:SB	0/1	0	33	0.976	33
Pre-Subject 1	chr1	53069883	53069885	CTG	-	PODN	In_Frame_Del	NM_153703	exon2	c.172_174del	p.L61del	DEL	exonic	PODN	.	nonframeshift deletion	PODN:NM_153703:exon2:c.172_174del:p.L61del,PODN:NM_001199081:exon3:c.115_117del:p.L42del,PODN:NM_001199080:exon4:c.115_117del:p.L42del	29	chr1	53069882	CCTG	C	AS_SB_TABLE=20,7|2,0;DP=33;ECNT=1;MBQ=36,36;MFRL=199,174;MMQ=60,60;MPOS=23;POPAF=7.30;RPA=4,3;RU=CTG;STR;TLOD=4.99	GT:AD:AF:DP:F1R2:F2R1:SB	0/1	27	2	0.102	29
Pre-Subject 1	chr1	53088069	53088069	C	A	SLC1A7	Silent	NM_001287595	exon11	c.G1800T	p.L600L	SNP	exonic	SLC1A7	.	synonymous SNV	SLC1A7:NM_001287595:exon11:c.G1800T:p.L600L,SLC1A7:NM_006671:exon11:c.G1623T:p.L541L	40	chr1	53088069	C	A	AS_SB_TABLE=26,12|2,0;DP=43;ECNT=2;MBQ=36,36;MFRL=223,227;MMQ=60,60;MPOS=19;POPAF=7.30;TLOD=3.70	GT:AD:AF:DP:F1R2:F2R1:PGT:PID:PS:SB	0|1	38	2	0.074	40
Pre-Subject 1	chr1	53088082	53088082	T	C	SLC1A7	Missense_Mutation	NM_001287595	exon11	c.A1787G	p.Q596R	SNP	exonic	SLC1A7	.	nonsynonymous SNV	SLC1A7:NM_001287595:exon11:c.A1787G:p.Q596R,SLC1A7:NM_006671:exon11:c.A1610G:p.Q537R	38	chr1	53088082	T	C	AS_SB_TABLE=0,0|25,13;DP=42;ECNT=2;MBQ=0,36;MFRL=0,210;MMQ=60,60;MPOS=22;PON;POPAF=0.234;TLOD=140.67	GT:AD:AF:DP:F1R2:F2R1:PGT:PID:PS:SB	0|1	0	38	0.974	38
Pre-Subject 1	chr1	54036707	54036707	C	A	TMEM59	Missense_Mutation	NM_001305050	exon5	c.G521T	p.W174L	SNP	exonic	TMEM59	.	nonsynonymous SNV	TMEM59:NM_001305050:exon5:c.G521T:p.W174L,TMEM59:NM_001305052:exon6:c.G326T:p.W109L,TMEM59:NM_001305043:exon7:c.G722T:p.W241L,TMEM59:NM_001305049:exon7:c.G329T:p.W110L,TMEM59:NM_001305051:exon7:c.G326T:p.W109L,TMEM59:NM_004872:exon7:c.G719T:p.W240L	58	chr1	54036707	C	A	AS_SB_TABLE=6,50|0,2;DP=60;ECNT=2;MBQ=36,36;MFRL=201,159;MMQ=60,60;MPOS=26;POPAF=7.30;TLOD=3.16	GT:AD:AF:DP:F1R2:F2R1:SB	0/1	56	2	0.05	58
Pre-Subject 1	chr1	54036713	54036713	G	C	TMEM59	Missense_Mutation	NM_001305050	exon5	c.C515G	p.S172C	SNP	exonic	TMEM59	.	nonsynonymous SNV	TMEM59:NM_001305050:exon5:c.C515G:p.S172C,TMEM59:NM_001305052:exon6:c.C320G:p.S107C,TMEM59:NM_001305043:exon7:c.C716G:p.S239C,TMEM59:NM_001305049:exon7:c.C323G:p.S108C,TMEM59:NM_001305051:exon7:c.C320G:p.S107C,TMEM59:NM_004872:exon7:c.C713G:p.S238C	53	chr1	54036713	G	C	AS_SB_TABLE=5,46|0,2;DP=54;ECNT=2;MBQ=36,25;MFRL=200,221;MMQ=60,60;MPOS=35;POPAF=7.30;TLOD=3.01	GT:AD:AF:DP:F1R2:F2R1:SB	0/1	51	2	0.054	53
Pre-Subject 1	chr1	54602721	54602721	A	T	ACOT11	Missense_Mutation	NM_015547	exon10	c.A1082T	p.D361V	SNP	exonic	ACOT11	.	nonsynonymous SNV	ACOT11:NM_015547:exon10:c.A1082T:p.D361V,ACOT11:NM_147161:exon10:c.A1082T:p.D361V	47	chr1	54602721	A	T	AS_SB_TABLE=23,22|0,2;DP=49;ECNT=1;MBQ=36,36;MFRL=185,214;MMQ=60,60;MPOS=22;POPAF=7.30;TLOD=3.52	GT:AD:AF:DP:F1R2:F2R1:SB	0/1	45	2	0.065	47
Pre-Subject 1	chr1	54781393	54781393	C	G	TTC22	Silent	NM_001114108	exon7	c.G1560C	p.V520V	SNP	exonic	TTC22	.	synonymous SNV	TTC22:NM_001114108:exon7:c.G1560C:p.V520V	17	chr1	54781393	C	G	AS_SB_TABLE=3,4|3,7;DP=18;ECNT=1;MBQ=36,36;MFRL=155,193;MMQ=60,60;MPOS=21;POPAF=3.76;TLOD=33.72	GT:AD:AF:DP:F1R2:F2R1:SB	0/1	7	10	0.611	17
Pre-Subject 1	chr1	54817058	54817058	C	G	LEXM	Missense_Mutation	NM_001110533	exon9	c.C1120G	p.R374G	SNP	exonic	LEXM	.	nonsynonymous SNV	LEXM:NM_001110533:exon9:c.C1120G:p.R374G,LEXM:NM_152607:exon9:c.C1120G:p.R374G	24	chr1	54817058	C	G	AS_SB_TABLE=3,9|4,8;DP=27;ECNT=1;MBQ=36,36;MFRL=171,230;MMQ=60,60;MPOS=16;POPAF=3.35;TLOD=37.31	GT:AD:AF:DP:F1R2:F2R1:SB	0/1	12	12	0.5	24
Pre-Subject 1	chr1	55039879	55039879	-	CTG	PCSK9	In_Frame_Ins	NM_174936	exon1	c.42_43insCTG	p.L23_G24insL	INS	exonic	PCSK9	.	nonframeshift insertion	PCSK9:NM_174936:exon1:c.42_43insCTG:p.L23_G24insL	32	chr1	55039879	A	ACTG	AS_SB_TABLE=6,8|11,7;DP=46;ECNT=1;MBQ=36,36;MFRL=206,219;MMQ=60,60;MPOS=24;PON;POPAF=7.30;RPA=7,8;RU=CTG;STR;TLOD=68.24	GT:AD:AF:DP:F1R2:F2R1:SB	0/1	14	18	0.556	32
Pre-Subject 1	chr1	62273683	62273683	A	T	KANK4	Missense_Mutation	NM_181712	exon3	c.T1421A	p.L474Q	SNP	exonic	KANK4	.	nonsynonymous SNV	KANK4:NM_181712:exon3:c.T1421A:p.L474Q	44	chr1	62273683	A	T	AS_SB_TABLE=20,21|1,2;DP=45;ECNT=1;MBQ=36,36;MFRL=231,198;MMQ=60,60;MPOS=33;POPAF=7.30;TLOD=6.46	GT:AD:AF:DP:F1R2:F2R1:SB	0/1	41	3	0.087	44
Pre-Subject 1	chr1	62274774	62274774	T	C	KANK4	Silent	NM_181712	exon3	c.A330G	p.P110P	SNP	exonic	KANK4	.	synonymous SNV	KANK4:NM_181712:exon3:c.A330G:p.P110P	33	chr1	62274774	T	C	AS_SB_TABLE=0,0|23,10;DP=35;ECNT=2;MBQ=0,36;MFRL=0,206;MMQ=60,60;MPOS=9;PON;POPAF=0.119;TLOD=140.12	GT:AD:AF:DP:F1R2:F2R1:PGT:PID:PS:SB	0|1	0	33	0.971	33
Pre-Subject 1	chr1	62274777	62274777	T	C	KANK4	Silent	NM_181712	exon3	c.A327G	p.S109S	SNP	exonic	KANK4	.	synonymous SNV	KANK4:NM_181712:exon3:c.A327G:p.S109S	35	chr1	62274777	T	C	AS_SB_TABLE=0,0|24,11;DP=39;ECNT=2;MBQ=0,36;MFRL=0,209;MMQ=60,60;MPOS=11;PON;POPAF=0.131;TLOD=150.37	GT:AD:AF:DP:F1R2:F2R1:PGT:PID:PS:SB	0|1	0	35	0.974	35
Pre-Subject 1	chr1	62816638	62816638	A	G	ATG4C	Missense_Mutation	NM_032852	exon4	c.A224G	p.N75S	SNP	exonic	ATG4C	.	nonsynonymous SNV	ATG4C:NM_032852:exon4:c.A224G:p.N75S,ATG4C:NM_178221:exon4:c.A224G:p.N75S	38	chr1	62816638	A	G	AS_SB_TABLE=13,7|12,6;DP=39;ECNT=1;MBQ=36,36;MFRL=180,197;MMQ=60,60;MPOS=22;POPAF=3.02;TLOD=57.79	GT:AD:AF:DP:F1R2:F2R1:SB	0/1	20	18	0.472	38
Pre-Subject 1	chr1	64178086	64178087	TG	-	ROR1	Frame_Shift_Del	NM_005012	exon9	c.2045_2046del	p.W683Gfs*15	DEL	exonic	ROR1	.	frameshift deletion	ROR1:NM_005012:exon9:c.2045_2046del:p.W683Gfs*15	69	chr1	64178085	TTG	T	AS_SB_TABLE=38,29|1,1;DP=76;ECNT=1;MBQ=36,36;MFRL=210,202;MMQ=60,60;MPOS=17;POPAF=7.30;RPA=2,1;RU=TG;STR;TLOD=3.81	GT:AD:AF:DP:F1R2:F2R1:SB	0/1	67	2	0.043	69
Pre-Subject 1	chr1	64641882	64641882	G	T	CACHD1	Missense_Mutation	NM_001293274	exon7	c.G181T	p.D61Y	SNP	exonic	CACHD1	.	nonsynonymous SNV	CACHD1:NM_001293274:exon7:c.G181T:p.D61Y,CACHD1:NM_020925:exon8:c.G1069T:p.D357Y	30	chr1	64641882	G	T	AS_SB_TABLE=15,10|0,5;DP=30;ECNT=1;MBQ=32,18;MFRL=189,224;MMQ=60,60;MPOS=24;POPAF=7.30;TLOD=5.18	GT:AD:AF:DP:F1R2:F2R1:SB	0/1	25	5	0.182	30
Pre-Subject 1	chr1	64837976	64837976	C	T	JAK1	Silent	NM_001321852	exon22	c.G3096A	p.K1032K	SNP	exonic	JAK1	.	synonymous SNV	JAK1:NM_001321852:exon22:c.G3096A:p.K1032K,JAK1:NM_001321856:exon22:c.G3096A:p.K1032K,JAK1:NM_001321857:exon22:c.G3093A:p.K1031K,JAK1:NM_002227:exon22:c.G3096A:p.K1032K,JAK1:NM_001320923:exon23:c.G3096A:p.K1032K,JAK1:NM_001321854:exon23:c.G3096A:p.K1032K,JAK1:NM_001321855:exon23:c.G3096A:p.K1032K,JAK1:NM_001321853:exon24:c.G3096A:p.K1032K	59	chr1	64837976	C	T	AS_SB_TABLE=22,11|17,9;DP=64;ECNT=1;MBQ=36,36;MFRL=215,223;MMQ=60,60;MPOS=18;PON;POPAF=1.08;TLOD=80.41	GT:AD:AF:DP:F1R2:F2R1:SB	0/1	33	26	0.432	59
Pre-Subject 1	chr1	65412950	65412950	C	T	DNAJC6	Silent	NM_001256864	exon19	c.C2838T	p.Y946Y	SNP	exonic	DNAJC6	.	synonymous SNV	DNAJC6:NM_001256864:exon19:c.C2838T:p.Y946Y,DNAJC6:NM_014787:exon19:c.C2667T:p.Y889Y,DNAJC6:NM_001256865:exon20:c.C2628T:p.Y876Y	51	chr1	65412950	C	T	AS_SB_TABLE=22,7|15,7;DP=53;ECNT=1;MBQ=36,36;MFRL=253,259;MMQ=60,60;MPOS=11;POPAF=7.30;TLOD=68.53	GT:AD:AF:DP:F1R2:F2R1:SB	0/1	29	22	0.441	51
Pre-Subject 1	chr1	68446789	68446789	G	A	RPE65	Missense_Mutation	NM_000329	exon3	c.C166T	p.P56S	SNP	exonic	RPE65	.	nonsynonymous SNV	RPE65:NM_000329:exon3:c.C166T:p.P56S	30	chr1	68446789	G	A	AS_SB_TABLE=6,18|1,5;DP=32;ECNT=1;MBQ=36,36;MFRL=206,224;MMQ=60,60;MPOS=19;POPAF=7.30;TLOD=17.71	GT:AD:AF:DP:F1R2:F2R1:SB	0/1	24	6	0.225	30
Pre-Subject 1	chr1	74201324	74201324	G	C	FPGT	Missense_Mutation	NM_001112808	exon3	c.G296C	p.G99A	SNP	exonic	FPGT;FPGT-TNNI3K	.	nonsynonymous SNV	FPGT-TNNI3K:NM_001112808:exon3:c.G296C:p.G99A,FPGT-TNNI3K:NM_001199327:exon3:c.G296C:p.G99A,FPGT:NM_001199328:exon3:c.G296C:p.G99A,FPGT:NM_001199329:exon3:c.G296C:p.G99A,FPGT:NM_003838:exon3:c.G296C:p.G99A	60	chr1	74201324	G	C	AS_SB_TABLE=24,26|6,4;DP=60;ECNT=1;MBQ=36,36;MFRL=209,189;MMQ=60,60;MPOS=27;POPAF=7.30;TLOD=28.21	GT:AD:AF:DP:F1R2:F2R1:SB	0/1	50	10	0.181	60
Pre-Subject 1	chr1	74436083	74436083	C	A	FPGT-TNNI3K	Missense_Mutation	NM_015978	exon18	c.C1776A	p.H592Q	SNP	exonic	FPGT-TNNI3K;TNNI3K	.	nonsynonymous SNV	TNNI3K:NM_015978:exon18:c.C1776A:p.H592Q,FPGT-TNNI3K:NM_001112808:exon20:c.C2118A:p.H706Q,FPGT-TNNI3K:NM_001199327:exon20:c.C2118A:p.H706Q	15	chr1	74436083	C	A	AS_SB_TABLE=8,4|3,0;DP=16;ECNT=4;MBQ=32,14;MFRL=231,196;MMQ=60,60;MPOS=23;POPAF=7.30;TLOD=4.00	GT:AD:AF:DP:F1R2:F2R1:SB	0/1	12	3	0.163	15
Pre-Subject 1	chr1	74436090	74436090	C	G	FPGT-TNNI3K	Missense_Mutation	NM_015978	exon18	c.C1783G	p.L595V	SNP	exonic	FPGT-TNNI3K;TNNI3K	.	nonsynonymous SNV	TNNI3K:NM_015978:exon18:c.C1783G:p.L595V,FPGT-TNNI3K:NM_001112808:exon20:c.C2125G:p.L709V,FPGT-TNNI3K:NM_001199327:exon20:c.C2125G:p.L709V	17	chr1	74436090	C	G	AS_SB_TABLE=9,6|2,0;DP=19;ECNT=4;MBQ=34,14;MFRL=196,259;MMQ=60,60;MPOS=16;POPAF=7.30;TLOD=5.82	GT:AD:AF:DP:F1R2:F2R1:SB	0/1	15	2	0.154	17
Pre-Subject 1	chr1	74436095	74436095	C	A	FPGT-TNNI3K	Silent	NM_015978	exon18	c.C1788A	p.L596L	SNP	exonic	FPGT-TNNI3K;TNNI3K	.	synonymous SNV	TNNI3K:NM_015978:exon18:c.C1788A:p.L596L,FPGT-TNNI3K:NM_001112808:exon20:c.C2130A:p.L710L,FPGT-TNNI3K:NM_001199327:exon20:c.C2130A:p.L710L	20	chr1	74436095	C	A	AS_SB_TABLE=11,7|2,0;DP=21;ECNT=4;MBQ=34,14;MFRL=231,221;MMQ=60,60;MPOS=11;POPAF=7.30;TLOD=3.73	GT:AD:AF:DP:F1R2:F2R1:SB	0/1	18	2	0.134	20
Pre-Subject 1	chr1	74480640	74480640	A	G	LRRC53	Silent	NM_001364665	exon2	c.T417C	p.D139D	SNP	exonic	LRRC53	.	synonymous SNV	LRRC53:NM_001364665:exon2:c.T417C:p.D139D,LRRC53:NM_001364666:exon2:c.T321C:p.D107D	58	chr1	74480640	A	G	AS_SB_TABLE=11,19|8,20;DP=58;ECNT=1;MBQ=36,36;MFRL=202,192;MMQ=60,60;MPOS=17;POPAF=7.30;TLOD=93.37	GT:AD:AF:DP:F1R2:F2R1:SB	0/1	30	28	0.495	58
Pre-Subject 1	chr1	77926861	77926861	A	G	NEXN	Missense_Mutation	NM_001172309	exon7	c.A641G	p.K214R	SNP	exonic	NEXN	.	nonsynonymous SNV	NEXN:NM_001172309:exon7:c.A641G:p.K214R,NEXN:NM_144573:exon8:c.A833G:p.K278R	34	chr1	77926861	A	G	AS_SB_TABLE=6,26|1,1;DP=37;ECNT=1;MBQ=36,34;MFRL=198,177;MMQ=60,60;MPOS=19;POPAF=7.30;TLOD=4.27	GT:AD:AF:DP:F1R2:F2R1:SB	0/1	32	2	0.083	34
Pre-Subject 1	chr1	85132996	85132996	-	A	WDR63	In_Frame_Ins	NM_001288563	exon22	c.2558dupA	p.X853delinsX	SNP	exonic	WDR63	.	nonframeshift insertion	WDR63:NM_001288563:exon22:c.2558dupA:p.X853delinsX,WDR63:NM_145172:exon23:c.2675dupA:p.X892delinsX	58	chr1	85132996	T	TA	AS_SB_TABLE=14,13|14,17;DP=71;ECNT=2;MBQ=36,36;MFRL=197,175;MMQ=60,60;MPOS=19;PON;POPAF=1.25;RPA=6,7;RU=A;STR;TLOD=67.59	GT:AD:AF:DP:F1R2:F2R1:SB	0/1	27	31	0.517	58
Pre-Subject 1	chr1	85182937	85182937	C	T	SYDE2	Missense_Mutation	NM_032184	exon3	c.G1705A	p.V569I	SNP	exonic	SYDE2	.	nonsynonymous SNV	SYDE2:NM_032184:exon3:c.G1705A:p.V569I	70	chr1	85182937	C	T	AS_SB_TABLE=0,0|33,37;DP=72;ECNT=1;MBQ=0,36;MFRL=0,201;MMQ=60,60;MPOS=18;PON;POPAF=6.123e-03;TLOD=276.14	GT:AD:AF:DP:F1R2:F2R1:SB	0/1	0	70	0.986	70
Pre-Subject 1	chr1	85190233	85190233	G	A	SYDE2	Missense_Mutation	NM_032184	exon2	c.C1265T	p.S422L	SNP	exonic	SYDE2	.	nonsynonymous SNV	SYDE2:NM_032184:exon2:c.C1265T:p.S422L	49	chr1	85190233	G	A	AS_SB_TABLE=13,9|14,13;DP=51;ECNT=1;MBQ=36,36;MFRL=193,238;MMQ=60,60;MPOS=19;PON;POPAF=1.31;TLOD=93.45	GT:AD:AF:DP:F1R2:F2R1:SB	0/1	22	27	0.549	49
Pre-Subject 1	chr1	85252699	85252699	T	C	C1orf52	Missense_Mutation	NM_198077	exon3	c.A479G	p.D160G	SNP	exonic	C1orf52	.	nonsynonymous SNV	C1orf52:NM_198077:exon3:c.A479G:p.D160G	62	chr1	85252699	T	C	AS_SB_TABLE=4,26|3,29;DP=66;ECNT=1;MBQ=36,36;MFRL=182,224;MMQ=60,60;MPOS=12;POPAF=7.30;TLOD=106.71	GT:AD:AF:DP:F1R2:F2R1:SB	0/1	30	32	0.531	62
Pre-Subject 1	chr1	86580214	86580219	CCTACA	-	CLCA4	In_Frame_Del	NM_012128	exon14	c.2629_2634del	p.T886_P887del	DEL	exonic	CLCA4	.	nonframeshift deletion	CLCA4:NM_012128:exon14:c.2629_2634del:p.T886_P887del	104	chr1	86580213	TCCTACA	T	AS_SB_TABLE=0,0|55,49;DP=112;ECNT=1;MBQ=0,36;MFRL=0,181;MMQ=60,60;MPOS=22;PON;POPAF=0.171;TLOD=447.00	GT:AD:AF:DP:F1R2:F2R1:SB	0/1	0	104	0.991	104
Pre-Subject 1	chr1	89186395	89186395	A	T	GBP4	Missense_Mutation	NM_052941	exon10	c.T1645A	p.L549M	SNP	exonic	GBP4	.	nonsynonymous SNV	GBP4:NM_052941:exon10:c.T1645A:p.L549M	43	chr1	89186395	A	T	AS_SB_TABLE=21,11|6,5;DP=43;ECNT=7;MBQ=36,36;MFRL=174,235;MMQ=60,60;MPOS=13;PON;POPAF=0.358;TLOD=42.87	GT:AD:AF:DP:F1R2:F2R1:PGT:PID:PS:SB	0|1	32	11	0.279	43
Pre-Subject 1	chr1	89186407	89186407	T	G	GBP4	Missense_Mutation	NM_052941	exon10	c.A1633C	p.M545L	SNP	exonic	GBP4	.	nonsynonymous SNV	GBP4:NM_052941:exon10:c.A1633C:p.M545L	40	chr1	89186407	T	G	AS_SB_TABLE=17,13|3,7;DP=40;ECNT=7;MBQ=36,36;MFRL=187,236;MMQ=60,45;MPOS=8;PON;POPAF=0.359;TLOD=42.59	GT:AD:AF:DP:F1R2:F2R1:PGT:PID:PS:SB	0|1	30	10	0.267	40
Pre-Subject 1	chr1	89186411	89186411	G	A	GBP4	Silent	NM_052941	exon10	c.C1629T	p.A543A	SNP	exonic	GBP4	.	synonymous SNV	GBP4:NM_052941:exon10:c.C1629T:p.A543A	42	chr1	89186411	G	A	AS_SB_TABLE=16,16|2,8;DP=42;ECNT=7;MBQ=36,36;MFRL=174,215;MMQ=60,45;MPOS=6;PON;POPAF=0.359;TLOD=38.82	GT:AD:AF:DP:F1R2:F2R1:PGT:PID:PS:SB	0|1	32	10	0.256	42
Pre-Subject 1	chr1	89186414	89186414	C	T	GBP4	Missense_Mutation	NM_052941	exon10	c.G1626A	p.M542I	SNP	exonic	GBP4	.	nonsynonymous SNV	GBP4:NM_052941:exon10:c.G1626A:p.M542I	40	chr1	89186414	C	T	AS_SB_TABLE=14,17|1,8;DP=40;ECNT=7;MBQ=36,36;MFRL=169,232;MMQ=60,40;MPOS=7;PON;POPAF=0.358;TLOD=38.95	GT:AD:AF:DP:F1R2:F2R1:PGT:PID:PS:SB	0|1	31	9	0.262	40
Pre-Subject 1	chr1	89186419	89186419	A	T	GBP4	Missense_Mutation	NM_052941	exon10	c.T1621A	p.Y541N	SNP	exonic	GBP4	.	nonsynonymous SNV	GBP4:NM_052941:exon10:c.T1621A:p.Y541N	35	chr1	89186419	A	T	AS_SB_TABLE=13,16|2,4;DP=36;ECNT=7;MBQ=36,36;MFRL=167,235;MMQ=60,40;MPOS=15;PON;POPAF=0.358;TLOD=14.51	GT:AD:AF:DP:F1R2:F2R1:PGT:PID:PS:SB	0|1	29	6	0.194	35
Pre-Subject 1	chr1	91394211	91394211	G	A	HFM1	Nonsense_Mutation	NM_001017975	exon4	c.C376T	p.Q126X	SNP	exonic	HFM1	.	stopgain	HFM1:NM_001017975:exon4:c.C376T:p.Q126X	71	chr1	91394211	G	A	AS_SB_TABLE=28,8|25,10;DP=75;ECNT=3;MBQ=36,36;MFRL=170,195;MMQ=60,60;MPOS=19;POPAF=7.30;TLOD=111.92	GT:AD:AF:DP:F1R2:F2R1:SB	0/1	36	35	0.486	71
Pre-Subject 1	chr1	91394238	91394238	T	C	HFM1	Missense_Mutation	NM_001017975	exon4	c.A349G	p.I117V	SNP	exonic	HFM1	.	nonsynonymous SNV	HFM1:NM_001017975:exon4:c.A349G:p.I117V	64	chr1	91394238	T	C	AS_SB_TABLE=0,0|40,24;DP=68;ECNT=3;MBQ=0,36;MFRL=0,183;MMQ=60,60;MPOS=23;PON;POPAF=4.345e-04;TLOD=260.58	GT:AD:AF:DP:F1R2:F2R1:SB	0/1	0	64	0.985	64
Pre-Subject 1	chr1	91394244	91394244	A	G	HFM1	Missense_Mutation	NM_001017975	exon4	c.T343C	p.S115P	SNP	exonic	HFM1	.	nonsynonymous SNV	HFM1:NM_001017975:exon4:c.T343C:p.S115P	66	chr1	91394244	A	G	AS_SB_TABLE=23,12|16,15;DP=71;ECNT=3;MBQ=36,36;MFRL=197,169;MMQ=60,60;MPOS=19;PON;POPAF=0.660;TLOD=93.75	GT:AD:AF:DP:F1R2:F2R1:SB	0/1	35	31	0.467	66
Pre-Subject 1	chr1	92324042	92324042	G	C	RPAP2	Missense_Mutation	NM_024813	exon8	c.G1122C	p.L374F	SNP	exonic	RPAP2	.	nonsynonymous SNV	RPAP2:NM_024813:exon8:c.G1122C:p.L374F	58	chr1	92324042	G	C	AS_SB_TABLE=19,32|2,5;DP=62;ECNT=1;MBQ=36,36;MFRL=238,264;MMQ=60,60;MPOS=32;POPAF=7.30;TLOD=18.71	GT:AD:AF:DP:F1R2:F2R1:SB	0/1	51	7	0.133	58
Pre-Subject 1	chr1	92695345	92695345	T	C	EVI5	Missense_Mutation	NM_001308248	exon7	c.A1006G	p.I336V	SNP	exonic	EVI5	.	nonsynonymous SNV	EVI5:NM_001308248:exon7:c.A1006G:p.I336V,EVI5:NM_001350197:exon7:c.A874G:p.I292V,EVI5:NM_001350198:exon7:c.A874G:p.I292V,EVI5:NM_005665:exon7:c.A1006G:p.I336V	53	chr1	92695345	T	C	AS_SB_TABLE=0,0|24,29;DP=54;ECNT=1;MBQ=0,36;MFRL=0,189;MMQ=60,60;MPOS=22;PON;POPAF=0.040;TLOD=207.25	GT:AD:AF:DP:F1R2:F2R1:SB	0/1	0	53	0.982	53
Pre-Subject 1	chr1	99910740	99910740	A	G	AGL	Silent	NM_000028	exon28	c.A3729G	p.E1243E	SNP	exonic	AGL	.	synonymous SNV	AGL:NM_000028:exon28:c.A3729G:p.E1243E,AGL:NM_000642:exon28:c.A3729G:p.E1243E,AGL:NM_000643:exon28:c.A3729G:p.E1243E,AGL:NM_000644:exon28:c.A3729G:p.E1243E,AGL:NM_000646:exon28:c.A3681G:p.E1227E	25	chr1	99910740	A	G	AS_SB_TABLE=23,0|2,0;DP=26;ECNT=1;MBQ=36,36;MFRL=204,166;MMQ=60,60;MPOS=18;POPAF=7.30;TLOD=4.26	GT:AD:AF:DP:F1R2:F2R1:SB	0/1	23	2	0.111	25
Pre-Subject 1	chr1	100077165	100077165	A	C	MFSD14A	Missense_Mutation	NM_033055	exon9	c.A892C	p.T298P	SNP	exonic	MFSD14A	.	nonsynonymous SNV	MFSD14A:NM_033055:exon9:c.A892C:p.T298P	15	chr1	100077165	A	C	AS_SB_TABLE=10,3|2,0;DP=18;ECNT=3;MBQ=14,21;MFRL=159,136;MMQ=60,60;MPOS=34;POPAF=7.30;TLOD=4.99	GT:AD:AF:DP:F1R2:F2R1:SB	0/1	13	2	0.171	15
Pre-Subject 1	chr1	100077173	100077173	C	G	MFSD14A	Silent	NM_033055	exon9	c.C900G	p.V300V	SNP	exonic	MFSD14A	.	synonymous SNV	MFSD14A:NM_033055:exon9:c.C900G:p.V300V	18	chr1	100077173	C	G	AS_SB_TABLE=10,4|4,0;DP=19;ECNT=3;MBQ=36,14;MFRL=155,167;MMQ=60,60;MPOS=19;POPAF=7.30;TLOD=4.86	GT:AD:AF:DP:F1R2:F2R1:SB	0/1	14	4	0.204	18
Pre-Subject 1	chr1	109106568	109106568	T	C	C1orf194	Missense_Mutation	NM_001366201	exon3	c.A289G	p.K97E	SNP	exonic	C1orf194	.	nonsynonymous SNV	C1orf194:NM_001366201:exon3:c.A289G:p.K97E,C1orf194:NM_001366202:exon3:c.A253G:p.K85E,C1orf194:NM_001122961:exon4:c.A370G:p.K124E,C1orf194:NM_001245025:exon4:c.A406G:p.K136E,C1orf194:NM_001366200:exon4:c.A400G:p.K134E	35	chr1	109106568	T	C	AS_SB_TABLE=27,6|2,0;DP=36;ECNT=1;MBQ=36,36;MFRL=213,205;MMQ=60,60;MPOS=27;POPAF=7.30;TLOD=3.87	GT:AD:AF:DP:F1R2:F2R1:SB	0/1	33	2	0.084	35
Pre-Subject 1	chr1	109235353	109235353	G	T	SARS	Silent	NM_001330669	exon7	c.G891T	p.L297L	SNP	exonic	SARS	.	synonymous SNV	SARS:NM_001330669:exon7:c.G891T:p.L297L,SARS:NM_006513:exon7:c.G891T:p.L297L	14	chr1	109235353	G	T	AS_SB_TABLE=0,8|0,6;DP=15;ECNT=1;MBQ=36,36;MFRL=210,248;MMQ=60,60;MPOS=17;POPAF=2.85;TLOD=19.79	GT:AD:AF:DP:F1R2:F2R1:SB	0/1	8	6	0.437	14
Pre-Subject 1	chr1	109250113	109250113	-	CGC	CELSR2	In_Frame_Ins	NM_001408	exon1	c.34_35insCGC	p.P16_L17insP	INS	exonic	CELSR2	.	nonframeshift insertion	CELSR2:NM_001408:exon1:c.34_35insCGC:p.P16_L17insP	25	chr1	109250113	A	ACGC	AS_SB_TABLE=0,0|23,2;DP=27;ECNT=1;MBQ=0,36;MFRL=0,198;MMQ=60,60;MPOS=19;PON;POPAF=0.193;RPA=5,6;RU=CGC;STR;TLOD=102.17	GT:AD:AF:DP:F1R2:F2R1:SB	0/1	0	25	0.962	25
Pre-Subject 1	chr1	109264477	109264477	G	A	CELSR2	Silent	NM_001408	exon11	c.G5313A	p.P1771P	SNP	exonic	CELSR2	.	synonymous SNV	CELSR2:NM_001408:exon11:c.G5313A:p.P1771P	37	chr1	109264477	G	A	AS_SB_TABLE=12,1|15,9;DP=41;ECNT=1;MBQ=36,36;MFRL=163,163;MMQ=60,60;MPOS=10;PON;POPAF=0.428;TLOD=75.21	GT:AD:AF:DP:F1R2:F2R1:SB	0/1	13	24	0.611	37
Pre-Subject 1	chr1	109604015	109604015	C	G	GNAT2	Missense_Mutation	NM_005272	exon7	c.G810C	p.K270N	SNP	exonic	GNAT2	.	nonsynonymous SNV	GNAT2:NM_005272:exon7:c.G810C:p.K270N	36	chr1	109604015	C	G	AS_SB_TABLE=21,13|1,1;DP=40;ECNT=1;MBQ=36,36;MFRL=189,238;MMQ=60,60;MPOS=24;POPAF=7.30;TLOD=3.84	GT:AD:AF:DP:F1R2:F2R1:SB	0/1	34	2	0.082	36
Pre-Subject 1	chr1	109669334	109669334	C	T	GSTM2	Silent	NM_000848	exon4	c.C222T	p.N74N	SNP	exonic	GSTM2	.	synonymous SNV	GSTM2:NM_000848:exon4:c.C222T:p.N74N,GSTM2:NM_001142368:exon4:c.C222T:p.N74N	99	chr1	109669334	C	T	AS_SB_TABLE=35,13|40,11;DP=100;ECNT=1;MBQ=36,36;MFRL=201,179;MMQ=60,51;MPOS=17;PON;POPAF=0.876;TLOD=157.62	GT:AD:AF:DP:F1R2:F2R1:SB	0/1	48	51	0.511	99
Pre-Subject 1	chr1	109715209	109715209	T	C	GSTM5	Missense_Mutation	NM_000851	exon7	c.T536C	p.L179P	SNP	exonic	GSTM5	.	nonsynonymous SNV	GSTM5:NM_000851:exon7:c.T536C:p.L179P	43	chr1	109715209	T	C	AS_SB_TABLE=11,10|5,17;DP=44;ECNT=2;MBQ=36,36;MFRL=255,264;MMQ=60,60;MPOS=11;PON;POPAF=0.842;TLOD=84.90	GT:AD:AF:DP:F1R2:F2R1:PGT:PID:PS:SB	0|1	21	22	0.511	43
Pre-Subject 1	chr1	110340748	110340748	A	G	RBM15	Missense_Mutation	NM_001201545	exon1	c.A1343G	p.Y448C	SNP	exonic	RBM15	.	nonsynonymous SNV	RBM15:NM_001201545:exon1:c.A1343G:p.Y448C,RBM15:NM_022768:exon1:c.A1343G:p.Y448C	83	chr1	110340748	A	G	AS_SB_TABLE=61,19|3,0;DP=85;ECNT=1;MBQ=36,36;MFRL=209,145;MMQ=60,60;MPOS=11;POPAF=7.30;TLOD=5.76	GT:AD:AF:DP:F1R2:F2R1:SB	0/1	80	3	0.047	83
Pre-Subject 1	chr1	110604477	110604477	C	T	KCNA2	Silent	NM_001204269	exon3	c.G306A	p.V102V	SNP	exonic	KCNA2	.	synonymous SNV	KCNA2:NM_001204269:exon3:c.G306A:p.V102V,KCNA2:NM_004974:exon3:c.G306A:p.V102V	71	chr1	110604477	C	T	AS_SB_TABLE=33,33|2,3;DP=72;ECNT=1;MBQ=36,36;MFRL=200,176;MMQ=60,60;MPOS=20;POPAF=7.30;TLOD=11.54	GT:AD:AF:DP:F1R2:F2R1:SB	0/1	66	5	0.086	71
Pre-Subject 1	chr1	111776182	111776182	T	G	KCND3	Silent	NM_172198	exon7	c.A1806C	p.P602P	SNP	exonic	KCND3	.	synonymous SNV	KCND3:NM_172198:exon7:c.A1806C:p.P602P,KCND3:NM_004980:exon8:c.A1863C:p.P621P	85	chr1	111776182	T	G	AS_SB_TABLE=33,44|0,8;DP=92;ECNT=1;MBQ=32,21;MFRL=189,177;MMQ=60,60;MPOS=10;POPAF=7.30;TLOD=5.31	GT:AD:AF:DP:F1R2:F2R1:SB	0/1	77	8	0.081	85
Pre-Subject 1	chr1	115725533	115725533	C	G	CASQ2	Missense_Mutation	NM_001232	exon7	c.G758C	p.R253P	SNP	exonic	CASQ2	.	nonsynonymous SNV	CASQ2:NM_001232:exon7:c.G758C:p.R253P	40	chr1	115725533	C	G	AS_SB_TABLE=9,28|0,3;DP=41;ECNT=5;MBQ=36,14;MFRL=192,192;MMQ=60,60;MPOS=16;POPAF=7.30;TLOD=5.34	GT:AD:AF:DP:F1R2:F2R1:PGT:PID:PS:SB	0|1	37	3	0.111	40
Pre-Subject 1	chr1	115725536	115725536	A	C	CASQ2	Missense_Mutation	NM_001232	exon7	c.T755G	p.L252R	SNP	exonic	CASQ2	.	nonsynonymous SNV	CASQ2:NM_001232:exon7:c.T755G:p.L252R	40	chr1	115725536	A	C	AS_SB_TABLE=9,28|0,3;DP=40;ECNT=5;MBQ=36,14;MFRL=192,192;MMQ=60,60;MPOS=19;POPAF=7.30;TLOD=5.34	GT:AD:AF:DP:F1R2:F2R1:PGT:PID:PS:SB	0|1	37	3	0.111	40
Pre-Subject 1	chr1	115725541	115725541	A	C	CASQ2	Silent	NM_001232	exon7	c.T750G	p.R250R	SNP	exonic	CASQ2	.	synonymous SNV	CASQ2:NM_001232:exon7:c.T750G:p.R250R	39	chr1	115725541	A	C	AS_SB_TABLE=9,27|0,3;DP=39;ECNT=5;MBQ=36,14;MFRL=196,192;MMQ=60,60;MPOS=24;POPAF=7.30;TLOD=5.39	GT:AD:AF:DP:F1R2:F2R1:PGT:PID:PS:SB	0|1	36	3	0.114	39
Pre-Subject 1	chr1	115725553	115725553	T	G	CASQ2	Missense_Mutation	NM_001232	exon7	c.A738C	p.R246S	SNP	exonic	CASQ2	.	nonsynonymous SNV	CASQ2:NM_001232:exon7:c.A738C:p.R246S	32	chr1	115725553	T	G	AS_SB_TABLE=8,18|0,6;DP=32;ECNT=5;MBQ=32,14;MFRL=205,186;MMQ=60,60;MPOS=16;POPAF=7.30;TLOD=6.27	GT:AD:AF:DP:F1R2:F2R1:PGT:PID:PS:SB	0|1	26	6	0.165	32
Pre-Subject 1	chr1	116579663	116579663	-	TCC	IGSF3	In_Frame_Ins	NM_001007237	exon10	c.3062_3063insGGA	p.D1020_D1021insE	INS	exonic	IGSF3	.	nonframeshift insertion	IGSF3:NM_001007237:exon10:c.3062_3063insGGA:p.D1020_D1021insE,IGSF3:NM_001542:exon11:c.3122_3123insGGA:p.D1040_D1041insE	38	chr1	116579663	G	GTCC	AS_SB_TABLE=6,22|1,9;DP=45;ECNT=2;MBQ=36,36;MFRL=229,244;MMQ=60,60;MPOS=29;PON;POPAF=0.475;TLOD=12.55	GT:AD:AF:DP:F1R2:F2R1:SB	0/1	28	10	0.265	38
Pre-Subject 1	chr1	116579666	116579666	G	C	IGSF3	Missense_Mutation	NM_001007237	exon10	c.C3060G	p.D1020E	SNP	exonic	IGSF3	.	nonsynonymous SNV	IGSF3:NM_001007237:exon10:c.C3060G:p.D1020E,IGSF3:NM_001542:exon11:c.C3120G:p.D1040E	39	chr1	116579666	G	C	AS_SB_TABLE=6,21|2,10;DP=48;ECNT=2;MBQ=36,36;MFRL=228,244;MMQ=60,60;MPOS=25;PON;POPAF=7.30;TLOD=35.95	GT:AD:AF:DP:F1R2:F2R1:SB	0/1	27	12	0.305	39
Pre-Subject 1	chr1	120069404	120069404	C	T	NOTCH2	Translation_Start_Site	NM_001200001	exon1	c.G3A	p.M1?	SNP	exonic	NOTCH2	.	startloss	NOTCH2:NM_001200001:exon1:c.G3A:p.M1?,NOTCH2:NM_024408:exon1:c.G3A:p.M1?	38	chr1	120069404	C	T	AS_SB_TABLE=10,22|2,4;DP=42;ECNT=1;MBQ=36,20;MFRL=170,195;MMQ=57,27;MPOS=23;POPAF=7.30;TLOD=6.00	GT:AD:AF:DP:F1R2:F2R1:SB	0/1	32	6	0.133	38
Pre-Subject 1	chr1	120436639	120436640	AG	-	NBPF8	Frame_Shift_Del	NM_001037501	exon4	c.117_118del	p.R41Mfs*20	DEL	exonic	NBPF8	.	frameshift deletion	NBPF8:NM_001037501:exon4:c.117_118del:p.R41Mfs*20	53	chr1	120436638	AAG	A	AS_SB_TABLE=6,12|11,24;DP=64;ECNT=2;MBQ=36,36;MFRL=175,209;MMQ=25,25;MPOS=22;PON;POPAF=7.30;RPA=3,2;RU=AG;STR;TLOD=127.89	GT:AD:AF:DP:F1R2:F2R1:PGT:PID:PS:SB	0|1	18	35	0.655	53
Pre-Subject 1	chr1	120436644	120436644	G	A	NBPF8	Missense_Mutation	NM_001037501	exon4	c.G122A	p.R41K	SNP	exonic	NBPF8	.	nonsynonymous SNV	NBPF8:NM_001037501:exon4:c.G122A:p.R41K	53	chr1	120436644	G	A	AS_SB_TABLE=11,24|6,12;DP=55;ECNT=2;MBQ=36,36;MFRL=209,175;MMQ=25,25;MPOS=13;PON;POPAF=7.30;TLOD=41.48	GT:AD:AF:DP:F1R2:F2R1:PGT:PID:PS:SB	1|0	35	18	0.345	53
Pre-Subject 1	chr1	120449357	120449357	C	G	NBPF8	Missense_Mutation	NM_001037501	exon9	c.C943G	p.L315V	SNP	exonic	NBPF8	.	nonsynonymous SNV	NBPF8:NM_001037501:exon9:c.C943G:p.L315V	74	chr1	120449357	C	G	AS_SB_TABLE=27,37|0,10;DP=76;ECNT=2;MBQ=36,36;MFRL=198,129;MMQ=26,30;MPOS=15;PON;POPAF=7.30;TLOD=27.19	GT:AD:AF:DP:F1R2:F2R1:SB	0/1	64	10	0.14	74
Pre-Subject 1	chr1	121324478	121324478	G	A	SRGAP2C	Silent	NM_001271872	exon4	c.G261A	p.K87K	SNP	exonic	SRGAP2C	.	synonymous SNV	SRGAP2C:NM_001271872:exon4:c.G261A:p.K87K,SRGAP2C:NM_001329984:exon4:c.G261A:p.K87K	43	chr1	121324478	G	A	AS_SB_TABLE=31,1|11,0;DP=46;ECNT=1;MBQ=36,36;MFRL=200,173;MMQ=27,27;MPOS=10;POPAF=7.30;TLOD=21.67	GT:AD:AF:DP:F1R2:F2R1:SB	0/1	32	11	0.262	43
Pre-Subject 1	chr1	147172020	147172020	T	G	PRKAB2	Missense_Mutation	NM_005399	exon2	c.A125C	p.D42A	SNP	exonic	PRKAB2	.	nonsynonymous SNV	PRKAB2:NM_005399:exon2:c.A125C:p.D42A	35	chr1	147172020	T	G	AS_SB_TABLE=19,13|0,3;DP=42;ECNT=1;MBQ=36,32;MFRL=177,209;MMQ=60,60;MPOS=8;POPAF=7.30;TLOD=3.95	GT:AD:AF:DP:F1R2:F2R1:SB	0/1	32	3	0.097	35
Pre-Subject 1	chr1	147619694	147619694	A	C	BCL9	Silent	NM_004326	exon8	c.A1539C	p.G513G	SNP	exonic	BCL9	.	synonymous SNV	BCL9:NM_004326:exon8:c.A1539C:p.G513G	40	chr1	147619694	A	C	AS_SB_TABLE=16,21|3,0;DP=45;ECNT=1;MBQ=21,21;MFRL=205,159;MMQ=60,60;MPOS=17;POPAF=7.30;TLOD=3.68	GT:AD:AF:DP:F1R2:F2R1:SB	0/1	37	3	0.104	40
Pre-Subject 1	chr1	147908394	147908394	C	T	GJA8	Silent	NM_005267	exon2	c.C439T	p.L147L	SNP	exonic	GJA8	.	synonymous SNV	GJA8:NM_005267:exon2:c.C439T:p.L147L	72	chr1	147908394	C	T	AS_SB_TABLE=17,16|23,16;DP=73;ECNT=1;MBQ=36,36;MFRL=206,211;MMQ=60,60;MPOS=18;POPAF=3.33;TLOD=112.58	GT:AD:AF:DP:F1R2:F2R1:SB	0/1	33	39	0.513	72
Pre-Subject 1	chr1	148118714	148118714	C	G	NBPF11	Missense_Mutation	NM_001101663	exon9	c.G997C	p.E333Q	SNP	exonic	NBPF11	.	nonsynonymous SNV	NBPF11:NM_001101663:exon9:c.G997C:p.E333Q,NBPF11:NM_183372:exon11:c.G1159C:p.E387Q	74	chr1	148118714	C	G	AS_SB_TABLE=14,35|6,19;DP=75;ECNT=1;MBQ=36,36;MFRL=215,190;MMQ=22,23;MPOS=18;POPAF=7.30;TLOD=54.11	GT:AD:AF:DP:F1R2:F2R1:SB	0/1	49	25	0.346	74
Pre-Subject 1	chr1	148126839	148126839	C	G	NBPF11	Missense_Mutation	NM_001101663	exon3	c.G165C	p.Q55H	SNP	exonic	NBPF11	.	nonsynonymous SNV	NBPF11:NM_001101663:exon3:c.G165C:p.Q55H,NBPF11:NM_183372:exon5:c.G327C:p.Q109H	17	chr1	148126839	C	G	AS_SB_TABLE=6,5|4,2;DP=19;ECNT=1;MBQ=36,36;MFRL=175,169;MMQ=44,60;MPOS=9;POPAF=7.30;TLOD=19.53	GT:AD:AF:DP:F1R2:F2R1:SB	0/1	11	6	0.368	17
Pre-Subject 1	chr1	148953102	148953102	A	C	PDE4DIP	Missense_Mutation	NM_001002811	exon1	c.A322C	p.I108L	SNP	exonic	PDE4DIP	.	nonsynonymous SNV	PDE4DIP:NM_001002811:exon1:c.A322C:p.I108L,PDE4DIP:NM_001350520:exon1:c.A322C:p.I108L	56	chr1	148953102	A	C	AS_SB_TABLE=12,14|16,14;DP=56;ECNT=1;MBQ=36,36;MFRL=220,217;MMQ=27,27;MPOS=17;POPAF=2.22;TLOD=87.09	GT:AD:AF:DP:F1R2:F2R1:SB	0/1	26	30	0.549	56
Pre-Subject 1	chr1	148953687	148953687	A	C	PDE4DIP	Missense_Mutation	NM_001002811	exon1	c.A907C	p.I303L	SNP	exonic	PDE4DIP	.	nonsynonymous SNV	PDE4DIP:NM_001002811:exon1:c.A907C:p.I303L,PDE4DIP:NM_001350520:exon1:c.A907C:p.I303L	22	chr1	148953687	A	C	AS_SB_TABLE=5,8|5,4;DP=23;ECNT=1;MBQ=36,36;MFRL=232,262;MMQ=27,27;MPOS=19;POPAF=2.18;TLOD=21.70	GT:AD:AF:DP:F1R2:F2R1:SB	0/1	13	9	0.414	22
Pre-Subject 1	chr1	149390830	149390835	GGAGGA	-	NOTCH2NLC	In_Frame_Del	NM_001364013	exon1	c.43_48del	p.G17_G18del	DEL	exonic	NOTCH2NLC	.	nonframeshift deletion	NOTCH2NLC:NM_001364013:exon1:c.43_48del:p.G17_G18del	25	chr1	149390829	CGGAGGA	C	AS_SB_TABLE=13,10|0,2;DP=26;ECNT=1;MBQ=36,34;MFRL=195,129;MMQ=60,42;MPOS=6;POPAF=7.30;TLOD=4.04	GT:AD:AF:DP:F1R2:F2R1:SB	0/1	23	2	0.11	25
Pre-Subject 1	chr1	149935300	149935300	A	C	MTMR11	Silent	NM_181873	exon3	c.T108G	p.A36A	SNP	exonic	MTMR11	.	synonymous SNV	MTMR11:NM_181873:exon3:c.T108G:p.A36A,MTMR11:NM_001145862:exon4:c.T324G:p.A108A	38	chr1	149935300	A	C	AS_SB_TABLE=23,13|2,0;DP=38;ECNT=8;MBQ=36,14;MFRL=194,213;MMQ=60,50;MPOS=32;POPAF=7.30;TLOD=3.69	GT:AD:AF:DP:F1R2:F2R1:PGT:PID:PS:SB	0|1	36	2	0.066	38
Pre-Subject 1	chr1	149935312	149935312	T	G	MTMR11	Silent	NM_181873	exon3	c.A96C	p.G32G	SNP	exonic	MTMR11	.	synonymous SNV	MTMR11:NM_181873:exon3:c.A96C:p.G32G,MTMR11:NM_001145862:exon4:c.A312C:p.G104G	44	chr1	149935312	T	G	AS_SB_TABLE=28,14|2,0;DP=44;ECNT=8;MBQ=36,14;MFRL=192,213;MMQ=60,50;MPOS=23;POPAF=7.30;TLOD=3.52	GT:AD:AF:DP:F1R2:F2R1:PGT:PID:PS:SB	0|1	42	2	0.058	44
Pre-Subject 1	chr1	149944773	149944773	A	C	OTUD7B	Missense_Mutation	NM_020205	exon12	c.T1616G	p.L539W	SNP	exonic	OTUD7B	.	nonsynonymous SNV	OTUD7B:NM_020205:exon12:c.T1616G:p.L539W	57	chr1	149944773	A	C	AS_SB_TABLE=25,27|5,0;DP=59;ECNT=3;MBQ=36,14;MFRL=200,186;MMQ=60,60;MPOS=13;POPAF=7.30;TLOD=3.29	GT:AD:AF:DP:F1R2:F2R1:SB	0/1	52	5	0.071	57
Pre-Subject 1	chr1	149944781	149944781	C	G	OTUD7B	Silent	NM_020205	exon12	c.G1608C	p.G536G	SNP	exonic	OTUD7B	.	synonymous SNV	OTUD7B:NM_020205:exon12:c.G1608C:p.G536G	59	chr1	149944781	C	G	AS_SB_TABLE=19,31|9,0;DP=63;ECNT=3;MBQ=36,14;MFRL=199,186;MMQ=60,60;MPOS=17;POPAF=7.30;TLOD=7.58	GT:AD:AF:DP:F1R2:F2R1:SB	0/1	50	9	0.126	59
Pre-Subject 1	chr1	149944785	149944785	A	C	OTUD7B	Missense_Mutation	NM_020205	exon12	c.T1604G	p.V535G	SNP	exonic	OTUD7B	.	nonsynonymous SNV	OTUD7B:NM_020205:exon12:c.T1604G:p.V535G	61	chr1	149944785	A	C	AS_SB_TABLE=15,33|13,0;DP=65;ECNT=3;MBQ=36,14;MFRL=183,192;MMQ=60,60;MPOS=13;POPAF=7.30;TLOD=12.12	GT:AD:AF:DP:F1R2:F2R1:SB	0/1	48	13	0.179	61
Pre-Subject 1	chr1	149967442	149967442	A	C	OTUD7B	Silent	NM_020205	exon4	c.T354G	p.G118G	SNP	exonic	OTUD7B	.	synonymous SNV	OTUD7B:NM_020205:exon4:c.T354G:p.G118G	50	chr1	149967442	A	C	AS_SB_TABLE=11,36|3,0;DP=52;ECNT=2;MBQ=36,32;MFRL=205,220;MMQ=60,60;MPOS=19;POPAF=7.30;TLOD=4.75	GT:AD:AF:DP:F1R2:F2R1:SB	0/1	47	3	0.061	50
Pre-Subject 1	chr1	149967450	149967450	A	G	OTUD7B	Missense_Mutation	NM_020205	exon4	c.T346C	p.S116P	SNP	exonic	OTUD7B	.	nonsynonymous SNV	OTUD7B:NM_020205:exon4:c.T346C:p.S116P	47	chr1	149967450	A	G	AS_SB_TABLE=11,34|2,0;DP=47;ECNT=2;MBQ=36,14;MFRL=213,221;MMQ=60,60;MPOS=23;POPAF=7.30;TLOD=4.39	GT:AD:AF:DP:F1R2:F2R1:SB	0/1	45	2	0.065	47
Pre-Subject 1	chr1	150226708	150226713	TCCTCT	-	ANP32E	In_Frame_Del	NM_001136478	exon4	c.453_458del	p.E152_E153del	DEL	exonic	ANP32E	.	nonframeshift deletion	ANP32E:NM_001136478:exon4:c.453_458del:p.E152_E153del,ANP32E:NM_001280560:exon4:c.410_415del:p.K137_R138del,ANP32E:NM_001136479:exon5:c.432_437del:p.E145_E146del,ANP32E:NM_001280559:exon5:c.576_581del:p.E193_E194del,ANP32E:NM_030920:exon5:c.576_581del:p.E193_E194del	67	chr1	150226707	CTCCTCT	C	AS_SB_TABLE=13,20|12,22;DP=81;ECNT=1;MBQ=36,36;MFRL=226,195;MMQ=60,60;MPOS=19;PON;POPAF=0.573;RPA=2,1;RU=TCCTCT;STR;TLOD=125.46	GT:AD:AF:DP:F1R2:F2R1:SB	0/1	33	34	0.513	67
Pre-Subject 1	chr1	150553629	150553629	A	C	ADAMTSL4	Missense_Mutation	NM_001288607	exon6	c.A638C	p.E213A	SNP	exonic	ADAMTSL4	.	nonsynonymous SNV	ADAMTSL4:NM_001288607:exon6:c.A638C:p.E213A,ADAMTSL4:NM_001288608:exon6:c.A638C:p.E213A,ADAMTSL4:NM_019032:exon6:c.A638C:p.E213A,ADAMTSL4:NM_025008:exon6:c.A638C:p.E213A	52	chr1	150553629	A	C	AS_SB_TABLE=8,39|5,0;DP=54;ECNT=1;MBQ=36,14;MFRL=209,212;MMQ=60,60;MPOS=21;POPAF=7.30;TLOD=6.97	GT:AD:AF:DP:F1R2:F2R1:SB	0/1	47	5	0.139	52
Pre-Subject 1	chr1	150557567	150557567	G	A	ADAMTSL4	Silent	NM_019032	exon13	c.G2121A	p.A707A	SNP	exonic	ADAMTSL4	.	synonymous SNV	ADAMTSL4:NM_019032:exon13:c.G2121A:p.A707A,ADAMTSL4:NM_025008:exon13:c.G2121A:p.A707A,ADAMTSL4:NM_001288607:exon14:c.G2004A:p.A668A,ADAMTSL4:NM_001288608:exon14:c.G2190A:p.A730A	54	chr1	150557567	G	A	AS_SB_TABLE=10,19|15,10;DP=58;ECNT=1;MBQ=36,36;MFRL=232,224;MMQ=60,60;MPOS=13;POPAF=2.02;TLOD=77.75	GT:AD:AF:DP:F1R2:F2R1:SB	0/1	29	25	0.454	54
Pre-Subject 1	chr1	151047915	151047915	C	T	C1orf56	Missense_Mutation	NM_017860	exon1	c.C68T	p.A23V	SNP	exonic	C1orf56	.	nonsynonymous SNV	C1orf56:NM_017860:exon1:c.C68T:p.A23V	63	chr1	151047915	C	T	AS_SB_TABLE=46,15|2,0;DP=65;ECNT=1;MBQ=36,36;MFRL=197,214;MMQ=60,60;MPOS=35;POPAF=7.30;TLOD=3.09	GT:AD:AF:DP:F1R2:F2R1:SB	0/1	61	2	0.047	63
Pre-Subject 1	chr1	151136971	151136971	C	T	SEMA6C	Missense_Mutation	NM_001178062	exon10	c.G740A	p.C247Y	SNP	exonic	SEMA6C	.	nonsynonymous SNV	SEMA6C:NM_001178062:exon10:c.G740A:p.C247Y,SEMA6C:NM_001178061:exon11:c.G860A:p.C287Y,SEMA6C:NM_030913:exon11:c.G860A:p.C287Y	33	chr1	151136971	C	T	AS_SB_TABLE=12,19|2,0;DP=35;ECNT=1;MBQ=36,36;MFRL=210,148;MMQ=60,60;MPOS=24;POPAF=7.30;TLOD=3.89	GT:AD:AF:DP:F1R2:F2R1:SB	0/1	31	2	0.085	33
Pre-Subject 1	chr1	151142536	151142536	T	G	SEMA6C	Missense_Mutation	NM_001178061	exon3	c.A86C	p.D29A	SNP	exonic	SEMA6C	.	nonsynonymous SNV	SEMA6C:NM_001178061:exon3:c.A86C:p.D29A,SEMA6C:NM_001178062:exon3:c.A86C:p.D29A,SEMA6C:NM_030913:exon3:c.A86C:p.D29A	36	chr1	151142536	T	G	AS_SB_TABLE=19,11|0,6;DP=43;ECNT=1;MBQ=36,14;MFRL=207,214;MMQ=60,60;MPOS=10;POPAF=7.30;TLOD=6.40	GT:AD:AF:DP:F1R2:F2R1:SB	0/1	30	6	0.141	36
Pre-Subject 1	chr1	152108902	152108902	C	G	TCHH	Missense_Mutation	NM_007113	exon3	c.G4315C	p.V1439L	SNP	exonic	TCHH	.	nonsynonymous SNV	TCHH:NM_007113:exon3:c.G4315C:p.V1439L	50	chr1	152108902	C	G	AS_SB_TABLE=22,19|2,7;DP=53;ECNT=1;MBQ=32,14;MFRL=195,240;MMQ=60,60;MPOS=20;POPAF=7.30;TLOD=4.20	GT:AD:AF:DP:F1R2:F2R1:SB	0/1	41	9	0.13	50
Pre-Subject 1	chr1	152113029	152113029	A	C	TCHH	Missense_Mutation	NM_007113	exon3	c.T188G	p.L63R	SNP	exonic	TCHH	.	nonsynonymous SNV	TCHH:NM_007113:exon3:c.T188G:p.L63R	49	chr1	152113029	A	C	AS_SB_TABLE=0,0|17,32;DP=50;ECNT=1;MBQ=0,36;MFRL=0,187;MMQ=60,60;MPOS=16;PON;POPAF=3.488e-03;TLOD=182.42	GT:AD:AF:DP:F1R2:F2R1:SB	0/1	0	49	0.98	49
Pre-Subject 1	chr1	152155578	152155578	T	A	RPTN	Missense_Mutation	NM_001122965	exon3	c.A1521T	p.Q507H	SNP	exonic	RPTN	.	nonsynonymous SNV	RPTN:NM_001122965:exon3:c.A1521T:p.Q507H	147	chr1	152155578	T	A	AS_SB_TABLE=53,79|14,1;DP=170;ECNT=1;MBQ=14,14;MFRL=173,172;MMQ=60,55;MPOS=17;POPAF=7.30;TLOD=5.53	GT:AD:AF:DP:F1R2:F2R1:SB	0/1	132	15	0.062	147
Pre-Subject 1	chr1	152155667	152155667	G	T	RPTN	Missense_Mutation	NM_001122965	exon3	c.C1432A	p.P478T	SNP	exonic	RPTN	.	nonsynonymous SNV	RPTN:NM_001122965:exon3:c.C1432A:p.P478T	169	chr1	152155667	G	T	AS_SB_TABLE=85,54|26,4;DP=178;ECNT=1;MBQ=32,14;MFRL=173,245;MMQ=60,54;MPOS=15;POPAF=3.19;TLOD=5.30	GT:AD:AF:DP:F1R2:F2R1:SB	0/1	139	30	0.096	169
Pre-Subject 1	chr1	152155841	152155841	G	T	RPTN	Silent	NM_001122965	exon3	c.C1258A	p.R420R	SNP	exonic	RPTN	.	synonymous SNV	RPTN:NM_001122965:exon3:c.C1258A:p.R420R	145	chr1	152155841	G	T	AS_SB_TABLE=65,64|13,3;DP=152;ECNT=2;MBQ=32,14;MFRL=188,276;MMQ=60,60;MPOS=5;POPAF=2.30;TLOD=7.87	GT:AD:AF:DP:F1R2:F2R1:SB	0/1	129	16	0.07	145
Pre-Subject 1	chr1	152155878	152155878	C	G	RPTN	Missense_Mutation	NM_001122965	exon3	c.G1221C	p.E407D	SNP	exonic	RPTN	.	nonsynonymous SNV	RPTN:NM_001122965:exon3:c.G1221C:p.E407D	188	chr1	152155878	C	G	AS_SB_TABLE=103,56|10,19;DP=200;ECNT=2;MBQ=32,14;MFRL=184,265;MMQ=60,51;MPOS=10;POPAF=2.48;TLOD=14.99	GT:AD:AF:DP:F1R2:F2R1:SB	0/1	159	29	0.107	188
Pre-Subject 1	chr1	152156032	152156032	T	C	RPTN	Missense_Mutation	NM_001122965	exon3	c.A1067G	p.D356G	SNP	exonic	RPTN	.	nonsynonymous SNV	RPTN:NM_001122965:exon3:c.A1067G:p.D356G	230	chr1	152156032	T	C	AS_SB_TABLE=76,139|14,1;DP=252;ECNT=1;MBQ=36,14;MFRL=191,252;MMQ=60,60;MPOS=9;POPAF=7.30;TLOD=4.41	GT:AD:AF:DP:F1R2:F2R1:SB	0/1	215	15	0.036	230
Pre-Subject 1	chr1	152156098	152156133	GGCTGACTGTAGTGGGAACTCTGGCCTTGTCTGTCC	-	RPTN	In_Frame_Del	NM_001122965	exon3	c.966_1001del	p.S332_Y343del	DEL	exonic	RPTN	.	nonframeshift deletion	RPTN:NM_001122965:exon3:c.966_1001del:p.S332_Y343del	219	chr1	152156097	TGGCTGACTGTAGTGGGAACTCTGGCCTTGTCTGTCC	T	AS_SB_TABLE=62,124|20,13;DP=246;ECNT=2;MBQ=36,32;MFRL=186,232;MMQ=60,60;MPOS=10;POPAF=7.30;TLOD=14.14	GT:AD:AF:DP:F1R2:F2R1:SB	0/1	186	33	0.111	219
Pre-Subject 1	chr1	152156142	152156213	GTAGTGGGAACTCTGGCCTTGTCTGTCTGTCTGACCATAATGATAACTCTGGTCTTGTCTGTCCGTCTGACC	-	RPTN	In_Frame_Del	NM_001122965	exon3	c.886_957del	p.G296_Y319del	DEL	exonic	RPTN	.	nonframeshift deletion	RPTN:NM_001122965:exon3:c.886_957del:p.G296_Y319del	233	chr1	152156141	TGTAGTGGGAACTCTGGCCTTGTCTGTCTGTCTGACCATAATGATAACTCTGGTCTTGTCTGTCCGTCTGACC	T	AS_SB_TABLE=68,156|2,7;DP=290;ECNT=2;MBQ=20,14;MFRL=225,142;MMQ=60,60;MPOS=9;POPAF=7.30;TLOD=7.74	GT:AD:AF:DP:F1R2:F2R1:SB	0/1	224	9	0.039	233
Pre-Subject 1	chr1	152213292	152213292	T	G	HRNR	Silent	NM_001009931	exon3	c.A8337C	p.S2779S	SNP	exonic	HRNR	.	synonymous SNV	HRNR:NM_001009931:exon3:c.A8337C:p.S2779S	20	chr1	152213292	T	G	AS_SB_TABLE=2,0|12,6;DP=68;ECNT=1;MBQ=14,27;MFRL=2303,294;MMQ=54,60;MPOS=4;PON;POPAF=0.177;TLOD=41.40	GT:AD:AF:DP:F1R2:F2R1:SB	0/1	2	18	0.929	20
Pre-Subject 1	chr1	152215086	152215086	A	C	HRNR	Missense_Mutation	NM_001009931	exon3	c.T6543G	p.H2181Q	SNP	exonic	HRNR	.	nonsynonymous SNV	HRNR:NM_001009931:exon3:c.T6543G:p.H2181Q	30	chr1	152215086	A	C	AS_SB_TABLE=0,0|27,3;DP=43;ECNT=3;MBQ=0,36;MFRL=0,164;MMQ=60,24;MPOS=14;PON;POPAF=0.013;TLOD=86.52	GT:AD:AF:DP:F1R2:F2R1:SB	0/1	0	30	0.974	30
Pre-Subject 1	chr1	152215112	152215112	C	T	HRNR	Missense_Mutation	NM_001009931	exon3	c.G6517A	p.G2173S	SNP	exonic	HRNR	.	nonsynonymous SNV	HRNR:NM_001009931:exon3:c.G6517A:p.G2173S	150	chr1	152215112	C	T	AS_SB_TABLE=43,71|18,18;DP=163;ECNT=3;MBQ=36,32;MFRL=184,232;MMQ=24,24;MPOS=6;PON;POPAF=0.658;TLOD=65.47	GT:AD:AF:DP:F1R2:F2R1:SB	0/1	114	36	0.245	150
Pre-Subject 1	chr1	152215143	152215143	A	G	HRNR	Silent	NM_001009931	exon3	c.T6486C	p.H2162H	SNP	exonic	HRNR	.	synonymous SNV	HRNR:NM_001009931:exon3:c.T6486C:p.H2162H	311	chr1	152215143	A	G	AS_SB_TABLE=74,155|41,41;DP=324;ECNT=3;MBQ=36,36;MFRL=209,240;MMQ=24,24;MPOS=27;PON;POPAF=1.25;TLOD=150.34	GT:AD:AF:DP:F1R2:F2R1:SB	0/1	229	82	0.261	311
Pre-Subject 1	chr1	152216006	152216006	C	G	HRNR	Missense_Mutation	NM_001009931	exon3	c.G5623C	p.E1875Q	SNP	exonic	HRNR	.	nonsynonymous SNV	HRNR:NM_001009931:exon3:c.G5623C:p.E1875Q	485	chr1	152216006	C	G	AS_SB_TABLE=226,223|19,17;DP=489;ECNT=1;MBQ=36,36;MFRL=209,199;MMQ=27,25;MPOS=23;POPAF=7.30;TLOD=52.48	GT:AD:AF:DP:F1R2:F2R1:SB	0/1	449	36	0.071	485
Pre-Subject 1	chr1	152216169	152216169	G	T	HRNR	Silent	NM_001009931	exon3	c.C5460A	p.G1820G	SNP	exonic	HRNR	.	synonymous SNV	HRNR:NM_001009931:exon3:c.C5460A:p.G1820G	107	chr1	152216169	G	T	AS_SB_TABLE=18,74|0,15;DP=132;ECNT=1;MBQ=36,14;MFRL=257,264;MMQ=27,27;MPOS=19;POPAF=7.30;TLOD=4.48	GT:AD:AF:DP:F1R2:F2R1:SB	0/1	92	15	0.098	107
Pre-Subject 1	chr1	152219687	152219687	G	T	HRNR	Missense_Mutation	NM_001009931	exon3	c.C1942A	p.R648S	SNP	exonic	HRNR	.	nonsynonymous SNV	HRNR:NM_001009931:exon3:c.C1942A:p.R648S	163	chr1	152219687	G	T	AS_SB_TABLE=86,72|5,0;DP=172;ECNT=1;MBQ=36,36;MFRL=217,270;MMQ=50,35;MPOS=29;PON;POPAF=0.640;TLOD=8.78	GT:AD:AF:DP:F1R2:F2R1:SB	0/1	158	5	0.037	163
Pre-Subject 1	chr1	152220073	152220073	T	G	HRNR	Missense_Mutation	NM_001009931	exon3	c.A1556C	p.Q519P	SNP	exonic	HRNR	.	nonsynonymous SNV	HRNR:NM_001009931:exon3:c.A1556C:p.Q519P	184	chr1	152220073	T	G	AS_SB_TABLE=52,49|38,45;DP=198;ECNT=1;MBQ=36,36;MFRL=226,226;MMQ=60,60;MPOS=15;PON;POPAF=1.28;TLOD=242.09	GT:AD:AF:DP:F1R2:F2R1:SB	0/1	101	83	0.44	184
Pre-Subject 1	chr1	152221068	152221068	A	G	HRNR	Silent	NM_001009931	exon3	c.T561C	p.H187H	SNP	exonic	HRNR	.	synonymous SNV	HRNR:NM_001009931:exon3:c.T561C:p.H187H	117	chr1	152221068	A	G	AS_SB_TABLE=0,0|41,76;DP=121;ECNT=2;MBQ=0,36;MFRL=0,238;MMQ=60,60;MPOS=19;PON;POPAF=0.134;TLOD=511.86	GT:AD:AF:DP:F1R2:F2R1:PGT:PID:PS:SB	0|1	0	117	0.992	117
Pre-Subject 1	chr1	152221071	152221071	G	A	HRNR	Silent	NM_001009931	exon3	c.C558T	p.S186S	SNP	exonic	HRNR	.	synonymous SNV	HRNR:NM_001009931:exon3:c.C558T:p.S186S	116	chr1	152221071	G	A	AS_SB_TABLE=0,0|41,75;DP=117;ECNT=2;MBQ=0,36;MFRL=0,238;MMQ=60,60;MPOS=19;PON;POPAF=0.016;TLOD=508.42	GT:AD:AF:DP:F1R2:F2R1:PGT:PID:PS:SB	0|1	0	116	0.992	116
Pre-Subject 1	chr1	152350857	152350857	G	T	FLG2	Missense_Mutation	NM_001014342	exon3	c.C6929A	p.S2310Y	SNP	exonic	FLG2	.	nonsynonymous SNV	FLG2:NM_001014342:exon3:c.C6929A:p.S2310Y	319	chr1	152350857	G	T	AS_SB_TABLE=204,104|5,6;DP=352;ECNT=1;MBQ=36,14;MFRL=192,137;MMQ=60,60;MPOS=26;POPAF=7.30;TLOD=4.76	GT:AD:AF:DP:F1R2:F2R1:SB	0/1	308	11	0.016	319
Pre-Subject 1	chr1	152351089	152351313	CATGTCTAGTGGTATCTCCTGTCTGTCCATGAGTAGTTCCCTGTCTCCCATGACCTGAGGATCCTGACTGTCCATGTCGAGATCCGGCTTGGCTGTGAGTGTGTCCTGAATGTGTGGGTGAGGCCTCTGAGTGCACTTCACTATCACTGGACTCACTGTGACTAGATCTTTGTCTTCCAGTTGTCCTGGAACCTGTCTGTGTGGACTGTCCATGACCAGACTGGC	-	FLG2	In_Frame_Del	NM_001014342	exon3	c.6473_6697del	p.G2158_H2232del	DEL	exonic	FLG2	.	nonframeshift deletion	FLG2:NM_001014342:exon3:c.6473_6697del:p.G2158_H2232del	1402	chr1	152351088	GCATGTCTAGTGGTATCTCCTGTCTGTCCATGAGTAGTTCCCTGTCTCCCATGACCTGAGGATCCTGACTGTCCATGTCGAGATCCGGCTTGGCTGTGAGTGTGTCCTGAATGTGTGGGTGAGGCCTCTGAGTGCACTTCACTATCACTGGACTCACTGTGACTAGATCTTTGTCTTCCAGTTGTCCTGGAACCTGTCTGTGTGGACTGTCCATGACCAGACTGGC	G	AS_SB_TABLE=569,621|137,75;DP=1407;ECNT=1;MBQ=36,36;MFRL=204,202;MMQ=60,60;MPOS=19;POPAF=7.30;TLOD=86.19	GT:AD:AF:DP:F1R2:F2R1:SB	0/1	1190	212	0.038	1402
Pre-Subject 1	chr1	152351309	152351309	C	G	FLG2	Missense_Mutation	NM_001014342	exon3	c.G6477C	p.Q2159H	SNP	exonic	FLG2	.	nonsynonymous SNV	FLG2:NM_001014342:exon3:c.G6477C:p.Q2159H	308	chr1	152351309	C	G	AS_SB_TABLE=148,146|5,9;DP=327;ECNT=6;MBQ=36,20;MFRL=215,222;MMQ=60,60;MPOS=7;POPAF=3.31;TLOD=9.37	GT:AD:AF:DP:F1R2:F2R1:SB	0/1	294	14	0.027	308
Pre-Subject 1	chr1	152351313	152351313	C	G	FLG2	Missense_Mutation	NM_001014342	exon3	c.G6473C	p.G2158A	SNP	exonic	FLG2	.	nonsynonymous SNV	FLG2:NM_001014342:exon3:c.G6473C:p.G2158A	301	chr1	152351313	C	G	AS_SB_TABLE=144,148|3,6;DP=331;ECNT=6;MBQ=36,21;MFRL=213,310;MMQ=60,60;MPOS=3;POPAF=3.38;TLOD=4.29	GT:AD:AF:DP:F1R2:F2R1:SB	0/1	292	9	0.02	301
Pre-Subject 1	chr1	152351398	152351398	T	C	FLG2	Missense_Mutation	NM_001014342	exon3	c.A6388G	p.R2130G	SNP	exonic	FLG2	.	nonsynonymous SNV	FLG2:NM_001014342:exon3:c.A6388G:p.R2130G	325	chr1	152351398	T	C	AS_SB_TABLE=143,169|4,9;DP=337;ECNT=6;MBQ=36,14;MFRL=205,76;MMQ=60,58;MPOS=15;POPAF=2.89;TLOD=6.96	GT:AD:AF:DP:F1R2:F2R1:SB	0/1	312	13	0.029	325
Pre-Subject 1	chr1	152351410	152351410	A	G	FLG2	Missense_Mutation	NM_001014342	exon3	c.T6376C	p.Y2126H	SNP	exonic	FLG2	.	nonsynonymous SNV	FLG2:NM_001014342:exon3:c.T6376C:p.Y2126H	308	chr1	152351410	A	G	AS_SB_TABLE=141,152|8,7;DP=313;ECNT=6;MBQ=36,14;MFRL=207,81;MMQ=60,57;MPOS=7;POPAF=2.55;TLOD=13.75	GT:AD:AF:DP:F1R2:F2R1:PGT:PID:PS:SB	0|1	293	15	0.029	308
Pre-Subject 1	chr1	152351413	152351413	T	C	FLG2	Missense_Mutation	NM_001014342	exon3	c.A6373G	p.T2125A	SNP	exonic	FLG2	.	nonsynonymous SNV	FLG2:NM_001014342:exon3:c.A6373G:p.T2125A	294	chr1	152351413	T	C	AS_SB_TABLE=133,150|4,7;DP=304;ECNT=6;MBQ=36,20;MFRL=206,81;MMQ=60,41;MPOS=4;POPAF=7.30;TLOD=14.45	GT:AD:AF:DP:F1R2:F2R1:PGT:PID:PS:SB	0|1	283	11	0.031	294
Pre-Subject 1	chr1	152351448	152351448	A	C	FLG2	Missense_Mutation	NM_001014342	exon3	c.T6338G	p.V2113G	SNP	exonic	FLG2	.	nonsynonymous SNV	FLG2:NM_001014342:exon3:c.T6338G:p.V2113G	267	chr1	152351448	A	C	AS_SB_TABLE=127,127|10,3;DP=286;ECNT=6;MBQ=36,21;MFRL=210,110;MMQ=60,35;MPOS=6;POPAF=1.52;TLOD=14.38	GT:AD:AF:DP:F1R2:F2R1:SB	0/1	254	13	0.039	267
Pre-Subject 1	chr1	152351931	152351931	C	G	FLG2	Missense_Mutation	NM_001014342	exon3	c.G5855C	p.G1952A	SNP	exonic	FLG2	.	nonsynonymous SNV	FLG2:NM_001014342:exon3:c.G5855C:p.G1952A	279	chr1	152351931	C	G	AS_SB_TABLE=128,134|13,4;DP=438;ECNT=4;MBQ=36,21;MFRL=201,114;MMQ=60,57;MPOS=19;POPAF=7.30;TLOD=19.73	GT:AD:AF:DP:F1R2:F2R1:SB	0/1	262	17	0.049	279
Pre-Subject 1	chr1	152351998	152352222	TGGTATCTCCTGTCTGTCCATGAGTAGTTTGGTGTCTCTTGTGAACTGTGGATTCTGACTCTCCATGTTGAGACCTGGCTTGGCTGTGTGTGTGTCCTGAATGTGTATGTGAGCCCCCTGAGTGCACTTCACTGTCACTGGACTCACTGTGGCCAGATCTCCTTCTTCCAGTTGTACTGGATCCTGACTGTGTGGACTGTCCATGACCAGATTGAGAATGTCCAC	-	FLG2	In_Frame_Del	NM_001014342	exon3	c.5564_5788del	p.S1855_T1929del	DEL	exonic	FLG2	.	nonframeshift deletion	FLG2:NM_001014342:exon3:c.5564_5788del:p.S1855_T1929del	1183	chr1	152351997	GTGGTATCTCCTGTCTGTCCATGAGTAGTTTGGTGTCTCTTGTGAACTGTGGATTCTGACTCTCCATGTTGAGACCTGGCTTGGCTGTGTGTGTGTCCTGAATGTGTATGTGAGCCCCCTGAGTGCACTTCACTGTCACTGGACTCACTGTGGCCAGATCTCCTTCTTCCAGTTGTACTGGATCCTGACTGTGTGGACTGTCCATGACCAGATTGAGAATGTCCAC	G	AS_SB_TABLE=466,431|157,129;DP=1191;ECNT=4;MBQ=36,36;MFRL=206,214;MMQ=60,60;MPOS=11;POPAF=7.30;TLOD=33.24	GT:AD:AF:DP:F1R2:F2R1:SB	0/1	897	286	0.028	1183
Pre-Subject 1	chr1	152352138	152352138	G	T	FLG2	Missense_Mutation	NM_001014342	exon3	c.C5648A	p.S1883Y	SNP	exonic	FLG2	.	nonsynonymous SNV	FLG2:NM_001014342:exon3:c.C5648A:p.S1883Y	222	chr1	152352138	G	T	AS_SB_TABLE=105,97|10,10;DP=388;ECNT=4;MBQ=36,14;MFRL=218,299;MMQ=60,60;MPOS=20;POPAF=3.01;TLOD=16.37	GT:AD:AF:DP:F1R2:F2R1:SB	0/1	202	20	0.058	222
Pre-Subject 1	chr1	152352461	152352461	G	T	FLG2	Silent	NM_001014342	exon3	c.C5325A	p.G1775G	SNP	exonic	FLG2	.	synonymous SNV	FLG2:NM_001014342:exon3:c.C5325A:p.G1775G	325	chr1	152352461	G	T	AS_SB_TABLE=174,133|9,9;DP=499;ECNT=2;MBQ=36,30;MFRL=216,303;MMQ=60,60;MPOS=9;POPAF=3.13;TLOD=15.49	GT:AD:AF:DP:F1R2:F2R1:SB	0/1	307	18	0.043	325
Pre-Subject 1	chr1	152352594	152352594	T	G	FLG2	Missense_Mutation	NM_001014342	exon3	c.A5192C	p.Y1731S	SNP	exonic	FLG2	.	nonsynonymous SNV	FLG2:NM_001014342:exon3:c.A5192C:p.Y1731S	259	chr1	152352594	T	G	AS_SB_TABLE=130,116|12,1;DP=345;ECNT=4;MBQ=36,14;MFRL=207,290;MMQ=60,60;MPOS=17;POPAF=7.30;TLOD=10.33	GT:AD:AF:DP:F1R2:F2R1:SB	0/1	246	13	0.038	259
Pre-Subject 1	chr1	152352607	152352607	C	T	FLG2	Missense_Mutation	NM_001014342	exon3	c.G5179A	p.G1727S	SNP	exonic	FLG2	.	nonsynonymous SNV	FLG2:NM_001014342:exon3:c.G5179A:p.G1727S	271	chr1	152352607	C	T	AS_SB_TABLE=149,114|8,0;DP=340;ECNT=4;MBQ=36,14;MFRL=211,293;MMQ=60,45;MPOS=9;POPAF=7.30;TLOD=5.64	GT:AD:AF:DP:F1R2:F2R1:PGT:PID:PS:SB	0|1	263	8	0.023	271
Pre-Subject 1	chr1	152352613	152352613	C	T	FLG2	Missense_Mutation	NM_001014342	exon3	c.G5173A	p.G1725R	SNP	exonic	FLG2	.	nonsynonymous SNV	FLG2:NM_001014342:exon3:c.G5173A:p.G1725R	282	chr1	152352613	C	T	AS_SB_TABLE=160,116|6,0;DP=351;ECNT=4;MBQ=36,21;MFRL=210,293;MMQ=60,41;MPOS=4;POPAF=7.30;TLOD=5.25	GT:AD:AF:DP:F1R2:F2R1:PGT:PID:PS:SB	0|1	276	6	0.02	282
Pre-Subject 1	chr1	152353047	152353047	G	C	FLG2	Missense_Mutation	NM_001014342	exon3	c.C4739G	p.T1580S	SNP	exonic	FLG2	.	nonsynonymous SNV	FLG2:NM_001014342:exon3:c.C4739G:p.T1580S	277	chr1	152353047	G	C	AS_SB_TABLE=120,151|5,1;DP=285;ECNT=2;MBQ=36,21;MFRL=207,319;MMQ=60,60;MPOS=15;POPAF=2.02;TLOD=4.69	GT:AD:AF:DP:F1R2:F2R1:SB	0/1	271	6	0.021	277
Pre-Subject 1	chr1	152353066	152353066	T	A	FLG2	Missense_Mutation	NM_001014342	exon3	c.A4720T	p.T1574S	SNP	exonic	FLG2	.	nonsynonymous SNV	FLG2:NM_001014342:exon3:c.A4720T:p.T1574S	269	chr1	152353066	T	A	AS_SB_TABLE=117,137|10,5;DP=280;ECNT=2;MBQ=36,14;MFRL=206,134;MMQ=60,60;MPOS=11;POPAF=2.22;TLOD=10.32	GT:AD:AF:DP:F1R2:F2R1:SB	0/1	254	15	0.041	269
Pre-Subject 1	chr1	152353283	152353283	G	A	FLG2	Silent	NM_001014342	exon3	c.C4503T	p.H1501H	SNP	exonic	FLG2	.	synonymous SNV	FLG2:NM_001014342:exon3:c.C4503T:p.H1501H	248	chr1	152353283	G	A	AS_SB_TABLE=120,115|7,6;DP=409;ECNT=1;MBQ=36,20;MFRL=201,73;MMQ=60,55;MPOS=8;POPAF=2.05;TLOD=8.68	GT:AD:AF:DP:F1R2:F2R1:SB	0/1	235	13	0.03	248
Pre-Subject 1	chr1	152353389	152353389	C	T	FLG2	Missense_Mutation	NM_001014342	exon3	c.G4397A	p.G1466E	SNP	exonic	FLG2	.	nonsynonymous SNV	FLG2:NM_001014342:exon3:c.G4397A:p.G1466E	473	chr1	152353389	C	T	AS_SB_TABLE=255,210|6,2;DP=474;ECNT=1;MBQ=36,14;MFRL=196,300;MMQ=60,50;MPOS=7;POPAF=7.30;TLOD=4.85	GT:AD:AF:DP:F1R2:F2R1:SB	0/1	465	8	0.013	473
Pre-Subject 1	chr1	152354900	152354900	G	T	FLG2	Silent	NM_001014342	exon3	c.C2886A	p.G962G	SNP	exonic	FLG2	.	synonymous SNV	FLG2:NM_001014342:exon3:c.C2886A:p.G962G	400	chr1	152354900	G	T	AS_SB_TABLE=161,195|20,24;DP=767;ECNT=1;MBQ=32,14;MFRL=200,301;MMQ=60,60;MPOS=11;POPAF=2.53;TLOD=23.38	GT:AD:AF:DP:F1R2:F2R1:SB	0/1	356	44	0.067	400
Pre-Subject 1	chr1	152355082	152355082	T	A	FLG2	Missense_Mutation	NM_001014342	exon3	c.A2704T	p.T902S	SNP	exonic	FLG2	.	nonsynonymous SNV	FLG2:NM_001014342:exon3:c.A2704T:p.T902S	417	chr1	152355082	T	A	AS_SB_TABLE=233,157|10,17;DP=443;ECNT=2;MBQ=32,14;MFRL=199,290;MMQ=60,48;MPOS=12;POPAF=2.88;TLOD=6.29	GT:AD:AF:DP:F1R2:F2R1:SB	0/1	390	27	0.031	417
Pre-Subject 1	chr1	152355415	152355415	T	A	FLG2	Missense_Mutation	NM_001014342	exon3	c.A2371T	p.T791S	SNP	exonic	FLG2	.	nonsynonymous SNV	FLG2:NM_001014342:exon3:c.A2371T:p.T791S	305	chr1	152355415	T	A	AS_SB_TABLE=116,180|9,0;DP=317;ECNT=1;MBQ=32,14;MFRL=203,264;MMQ=40,40;MPOS=12;POPAF=7.30;TLOD=3.12	GT:AD:AF:DP:F1R2:F2R1:SB	0/1	296	9	0.021	305
Pre-Subject 1	chr1	152355806	152355806	T	C	FLG2	Silent	NM_001014342	exon3	c.A1980G	p.S660S	SNP	exonic	FLG2	.	synonymous SNV	FLG2:NM_001014342:exon3:c.A1980G:p.S660S	368	chr1	152355806	T	C	AS_SB_TABLE=200,157|2,9;DP=420;ECNT=1;MBQ=36,32;MFRL=187,78;MMQ=52,21;MPOS=18;POPAF=7.30;TLOD=4.30	GT:AD:AF:DP:F1R2:F2R1:SB	0/1	357	11	0.022	368
Pre-Subject 1	chr1	152356031	152356031	C	A	FLG2	Silent	NM_001014342	exon3	c.G1755T	p.S585S	SNP	exonic	FLG2	.	synonymous SNV	FLG2:NM_001014342:exon3:c.G1755T:p.S585S	362	chr1	152356031	C	A	AS_SB_TABLE=168,162|15,17;DP=630;ECNT=1;MBQ=32,14;MFRL=194,198;MMQ=60,52;MPOS=18;POPAF=3.25;TLOD=4.75	GT:AD:AF:DP:F1R2:F2R1:SB	0/1	330	32	0.031	362
Pre-Subject 1	chr1	152356295	152356295	T	A	FLG2	Silent	NM_001014342	exon3	c.A1491T	p.S497S	SNP	exonic	FLG2	.	synonymous SNV	FLG2:NM_001014342:exon3:c.A1491T:p.S497S	303	chr1	152356295	T	A	AS_SB_TABLE=156,129|15,3;DP=329;ECNT=2;MBQ=32,14;MFRL=208,179;MMQ=60,60;MPOS=7;POPAF=7.30;TLOD=4.68	GT:AD:AF:DP:F1R2:F2R1:SB	0/1	285	18	0.035	303
Pre-Subject 1	chr1	152356304	152356304	T	A	FLG2	Missense_Mutation	NM_001014342	exon3	c.A1482T	p.Q494H	SNP	exonic	FLG2	.	nonsynonymous SNV	FLG2:NM_001014342:exon3:c.A1482T:p.Q494H	310	chr1	152356304	T	A	AS_SB_TABLE=163,135|8,4;DP=343;ECNT=2;MBQ=36,14;MFRL=208,193;MMQ=60,60;MPOS=7;POPAF=7.30;TLOD=4.15	GT:AD:AF:DP:F1R2:F2R1:SB	0/1	298	12	0.033	310
Pre-Subject 1	chr1	152566170	152566170	T	G	LCE3E	Silent	NM_178435	exon2	c.A39C	p.P13P	SNP	exonic	LCE3E	.	synonymous SNV	LCE3E:NM_178435:exon2:c.A39C:p.P13P	72	chr1	152566170	T	G	AS_SB_TABLE=29,26|0,17;DP=78;ECNT=1;MBQ=32,14;MFRL=208,234;MMQ=60,60;MPOS=27;POPAF=7.30;TLOD=18.22	GT:AD:AF:DP:F1R2:F2R1:SB	0/1	55	17	0.222	72
Pre-Subject 1	chr1	152579898	152579898	T	G	LCE3D	Silent	NM_032563	exon2	c.A39C	p.P13P	SNP	exonic	LCE3D	.	synonymous SNV	LCE3D:NM_032563:exon2:c.A39C:p.P13P	130	chr1	152579898	T	G	AS_SB_TABLE=56,58|0,16;DP=140;ECNT=1;MBQ=32,14;MFRL=196,206;MMQ=60,60;MPOS=18;POPAF=7.30;TLOD=3.89	GT:AD:AF:DP:F1R2:F2R1:SB	0/1	114	16	0.068	130
Pre-Subject 1	chr1	152709204	152709204	-	AGCTCTGGGGGCTGCTGT	LCE4A	In_Frame_Ins	NM_178356	exon1	c.129_130insAGCTCTGGGGGCTGCTGT	p.C48_G49insCSSGGC	INS	exonic	LCE4A	.	nonframeshift insertion	LCE4A:NM_178356:exon1:c.129_130insAGCTCTGGGGGCTGCTGT:p.C48_G49insCSSGGC	56	chr1	152709204	C	CAGCTCTGGGGGCTGCTGT	AS_SB_TABLE=0,0|11,45;DP=77;ECNT=1;MBQ=0,36;MFRL=0,190;MMQ=60,60;MPOS=25;PON;POPAF=0.128;TLOD=246.68	GT:AD:AF:DP:F1R2:F2R1:SB	0/1	0	56	0.984	56
Pre-Subject 1	chr1	152719714	152719839	CAAACCTACGTGAAGTGCCCAGCTCCCTGCCAGAGGACCTATGTGAAATACCCAACACCCTGCCAAACCTATGTGAAGTGCCCAGCTCCCTGCCAGACAACCTATGTAAAATGCCCAACTCCCTGC	-	C1orf68	In_Frame_Del	NM_001024679	exon1	c.193_318del	p.R76_Q117del	DEL	exonic	C1orf68	.	nonframeshift deletion	C1orf68:NM_001024679:exon1:c.193_318del:p.R76_Q117del	231	chr1	152719713	TCAAACCTACGTGAAGTGCCCAGCTCCCTGCCAGAGGACCTATGTGAAATACCCAACACCCTGCCAAACCTATGTGAAGTGCCCAGCTCCCTGCCAGACAACCTATGTAAAATGCCCAACTCCCTGC	T	AS_SB_TABLE=77,131|16,7;DP=309;ECNT=1;MBQ=36,36;MFRL=203,216;MMQ=60,60;MPOS=16;POPAF=7.30;TLOD=40.18	GT:AD:AF:DP:F1R2:F2R1:SB	0/1	208	23	0.077	231
Pre-Subject 1	chr1	152776532	152776532	-	CAGCTCTGGGGGCTGCTG	LCE1F	In_Frame_Ins	NM_178354	exon1	c.161_162insCAGCTCTGGGGGCTGCTG	p.G64_G65insCCSSGG	INS	exonic	LCE1F	.	nonframeshift insertion	LCE1F:NM_178354:exon1:c.161_162insCAGCTCTGGGGGCTGCTG:p.G64_G65insCCSSGG	52	chr1	152776532	C	CCAGCTCTGGGGGCTGCTG	AS_SB_TABLE=10,9|10,23;DP=81;ECNT=2;MBQ=36,36;MFRL=236,224;MMQ=60,60;MPOS=29;PON;POPAF=7.30;RPA=1,2;RU=CAGCTCTGGGGGCTGCTG;STR;TLOD=122.32	GT:AD:AF:DP:F1R2:F2R1:SB	0/1	19	33	0.615	52
Pre-Subject 1	chr1	152776615	152776615	C	T	LCE1F	Missense_Mutation	NM_178354	exon1	c.C244T	p.R82W	SNP	exonic	LCE1F	.	nonsynonymous SNV	LCE1F:NM_178354:exon1:c.C244T:p.R82W	61	chr1	152776615	C	T	AS_SB_TABLE=31,7|13,10;DP=64;ECNT=2;MBQ=36,36;MFRL=215,198;MMQ=60,60;MPOS=21;PON;POPAF=0.799;TLOD=71.04	GT:AD:AF:DP:F1R2:F2R1:SB	0/1	38	23	0.379	61
Pre-Subject 1	chr1	152787474	152787474	A	G	LCE1E	Missense_Mutation	NM_178353	exon2	c.A175G	p.S59G	SNP	exonic	LCE1E	.	nonsynonymous SNV	LCE1E:NM_178353:exon2:c.A175G:p.S59G	61	chr1	152787474	A	G	AS_SB_TABLE=14,19|11,17;DP=69;ECNT=2;MBQ=36,36;MFRL=260,248;MMQ=60,40;MPOS=14;PON;POPAF=0.274;TLOD=79.81	GT:AD:AF:DP:F1R2:F2R1:SB	0/1	33	28	0.461	61
Pre-Subject 1	chr1	152787503	152787503	C	T	LCE1E	Silent	NM_178353	exon2	c.C204T	p.C68C	SNP	exonic	LCE1E	.	synonymous SNV	LCE1E:NM_178353:exon2:c.C204T:p.C68C	86	chr1	152787503	C	T	AS_SB_TABLE=45,33|0,8;DP=91;ECNT=2;MBQ=36,36;MFRL=253,78427;MMQ=60,25;MPOS=27;POPAF=2.70;TLOD=11.22	GT:AD:AF:DP:F1R2:F2R1:SB	0/1	78	8	0.102	86
Pre-Subject 1	chr1	152797970	152797970	A	G	LCE1D	Missense_Mutation	NM_178352	exon2	c.A176G	p.N59S	SNP	exonic	LCE1D	.	nonsynonymous SNV	LCE1D:NM_178352:exon2:c.A176G:p.N59S	67	chr1	152797970	A	G	AS_SB_TABLE=29,34|4,0;DP=70;ECNT=1;MBQ=36,36;MFRL=266,195;MMQ=60,40;MPOS=24;POPAF=2.13;TLOD=7.74	GT:AD:AF:DP:F1R2:F2R1:SB	0/1	63	4	0.074	67
Pre-Subject 1	chr1	152805432	152805432	C	T	LCE1C	Missense_Mutation	NM_178351	exon2	c.G47A	p.C16Y	SNP	exonic	LCE1C	.	nonsynonymous SNV	LCE1C:NM_178351:exon2:c.G47A:p.C16Y	74	chr1	152805432	C	T	AS_SB_TABLE=23,0|51,0;DP=80;ECNT=1;MBQ=36,36;MFRL=181,190;MMQ=60,60;MPOS=23;PON;POPAF=0.830;TLOD=178.62	GT:AD:AF:DP:F1R2:F2R1:SB	0/1	23	51	0.684	74
Pre-Subject 1	chr1	152910688	152910688	T	G	IVL	Missense_Mutation	NM_005547	exon2	c.T891G	p.D297E	SNP	exonic	IVL	.	nonsynonymous SNV	IVL:NM_005547:exon2:c.T891G:p.D297E	38	chr1	152910688	T	G	AS_SB_TABLE=15,19|4,0;DP=39;ECNT=1;MBQ=32,23;MFRL=173,194;MMQ=60,60;MPOS=7;POPAF=1.85;TLOD=4.37	GT:AD:AF:DP:F1R2:F2R1:SB	0/1	34	4	0.099	38
Pre-Subject 1	chr1	152985356	152985356	C	A	SPRR1A	Missense_Mutation	NM_001199828	exon2	c.C126A	p.H42Q	SNP	exonic	SPRR1A	.	nonsynonymous SNV	SPRR1A:NM_001199828:exon2:c.C126A:p.H42Q,SPRR1A:NM_005987:exon2:c.C126A:p.H42Q	37	chr1	152985356	C	A	AS_SB_TABLE=2,0|13,22;DP=88;ECNT=2;MBQ=14,36;MFRL=240,240;MMQ=57,51;MPOS=12;PON;POPAF=7.30;TLOD=101.11	GT:AD:AF:DP:F1R2:F2R1:SB	0/1	2	35	0.944	37
Pre-Subject 1	chr1	152985411	152985411	G	A	SPRR1A	Missense_Mutation	NM_001199828	exon2	c.G181A	p.V61I	SNP	exonic	SPRR1A	.	nonsynonymous SNV	SPRR1A:NM_001199828:exon2:c.G181A:p.V61I,SPRR1A:NM_005987:exon2:c.G181A:p.V61I	46	chr1	152985411	G	A	AS_SB_TABLE=0,0|32,14;DP=49;ECNT=2;MBQ=0,36;MFRL=0,242;MMQ=60,60;MPOS=20;PON;POPAF=0.252;TLOD=132.42	GT:AD:AF:DP:F1R2:F2R1:SB	0/1	0	46	0.981	46
Pre-Subject 1	chr1	153032494	153032494	A	C	SPRR1B	Missense_Mutation	NM_003125	exon2	c.A149C	p.H50P	SNP	exonic	SPRR1B	.	nonsynonymous SNV	SPRR1B:NM_003125:exon2:c.A149C:p.H50P	32	chr1	153032494	A	C	AS_SB_TABLE=18,8|6,0;DP=36;ECNT=2;MBQ=36,14;MFRL=223,292;MMQ=50,41;MPOS=15;POPAF=7.30;TLOD=6.09	GT:AD:AF:DP:F1R2:F2R1:SB	0/1	26	6	0.176	32
Pre-Subject 1	chr1	153032507	153032507	C	T	SPRR1B	Silent	NM_003125	exon2	c.C162T	p.P54P	SNP	exonic	SPRR1B	.	synonymous SNV	SPRR1B:NM_003125:exon2:c.C162T:p.P54P	35	chr1	153032507	C	T	AS_SB_TABLE=0,0|28,7;DP=36;ECNT=2;MBQ=0,36;MFRL=0,229;MMQ=60,50;MPOS=19;PON;POPAF=7.30;TLOD=128.70	GT:AD:AF:DP:F1R2:F2R1:SB	0/1	0	35	0.973	35
Pre-Subject 1	chr1	153112711	153112711	C	T	SPRR2F	Missense_Mutation	NM_001014450	exon2	c.G23A	p.C8Y	SNP	exonic	SPRR2F	.	nonsynonymous SNV	SPRR2F:NM_001014450:exon2:c.G23A:p.C8Y	46	chr1	153112711	C	T	AS_SB_TABLE=18,26|1,1;DP=51;ECNT=1;MBQ=36,36;MFRL=215,270;MMQ=47,40;MPOS=18;POPAF=7.30;TLOD=3.47	GT:AD:AF:DP:F1R2:F2R1:SB	0/1	44	2	0.063	46
Pre-Subject 1	chr1	153341677	153341677	C	A	PGLYRP4	Missense_Mutation	NM_020393	exon6	c.G575T	p.G192V	SNP	exonic	PGLYRP4	.	nonsynonymous SNV	PGLYRP4:NM_020393:exon6:c.G575T:p.G192V	25	chr1	153341677	C	A	AS_SB_TABLE=0,0|17,8;DP=28;ECNT=1;MBQ=0,36;MFRL=0,166;MMQ=60,60;MPOS=21;PON;POPAF=0.076;TLOD=93.21	GT:AD:AF:DP:F1R2:F2R1:SB	0/1	0	25	0.963	25
Pre-Subject 1	chr1	153936061	153936061	T	G	DENND4B	Missense_Mutation	NM_001367466	exon17	c.A2600C	p.K867T	SNP	exonic	DENND4B	.	nonsynonymous SNV	DENND4B:NM_001367466:exon17:c.A2600C:p.K867T,DENND4B:NM_014856:exon17:c.A2567C:p.K856T	45	chr1	153936061	T	G	AS_SB_TABLE=35,7|3,0;DP=48;ECNT=3;MBQ=36,14;MFRL=189,183;MMQ=60,60;MPOS=15;POPAF=7.30;TLOD=4.17	GT:AD:AF:DP:F1R2:F2R1:SB	0/1	42	3	0.086	45
Pre-Subject 1	chr1	153944385	153944385	T	G	DENND4B	Missense_Mutation	NM_001367466	exon2	c.A23C	p.E8A	SNP	exonic	DENND4B	.	nonsynonymous SNV	DENND4B:NM_001367466:exon2:c.A23C:p.E8A	120	chr1	153944385	T	G	AS_SB_TABLE=27,81|11,1;DP=136;ECNT=2;MBQ=32,14;MFRL=219,213;MMQ=60,60;MPOS=29;POPAF=7.30;TLOD=4.91	GT:AD:AF:DP:F1R2:F2R1:SB	0/1	108	12	0.06	120
Pre-Subject 1	chr1	153944391	153944391	A	C	DENND4B	Missense_Mutation	NM_001367466	exon2	c.T17G	p.V6G	SNP	exonic	DENND4B	.	nonsynonymous SNV	DENND4B:NM_001367466:exon2:c.T17G:p.V6G	124	chr1	153944391	A	C	AS_SB_TABLE=30,88|6,0;DP=127;ECNT=2;MBQ=36,14;MFRL=219,201;MMQ=60,60;MPOS=20;POPAF=7.30;TLOD=3.23	GT:AD:AF:DP:F1R2:F2R1:SB	0/1	118	6	0.038	124
Pre-Subject 1	chr1	154571440	154571440	T	G	CHRNB2	Missense_Mutation	NM_000748	exon5	c.T617G	p.V206G	SNP	exonic	CHRNB2	.	nonsynonymous SNV	CHRNB2:NM_000748:exon5:c.T617G:p.V206G	84	chr1	154571440	T	G	AS_SB_TABLE=18,58|0,8;DP=87;ECNT=2;MBQ=32,14;MFRL=210,206;MMQ=60,60;MPOS=22;POPAF=7.30;TLOD=3.83	GT:AD:AF:DP:F1R2:F2R1:SB	0/1	76	8	0.078	84
Pre-Subject 1	chr1	154571459	154571459	C	A	CHRNB2	Silent	NM_000748	exon5	c.C636A	p.R212R	SNP	exonic	CHRNB2	.	synonymous SNV	CHRNB2:NM_000748:exon5:c.C636A:p.R212R	72	chr1	154571459	C	A	AS_SB_TABLE=14,54|0,4;DP=75;ECNT=2;MBQ=32,21;MFRL=213,220;MMQ=60,60;MPOS=20;POPAF=7.30;TLOD=5.23	GT:AD:AF:DP:F1R2:F2R1:SB	0/1	68	4	0.061	72
Pre-Subject 1	chr1	154598529	154598529	C	A	ADAR	Missense_Mutation	NM_001025107	exon3	c.G773T	p.S258I	SNP	exonic	ADAR	.	nonsynonymous SNV	ADAR:NM_001025107:exon3:c.G773T:p.S258I,ADAR:NM_001111:exon3:c.G1658T:p.S553I,ADAR:NM_001193495:exon3:c.G773T:p.S258I,ADAR:NM_001365045:exon3:c.G1685T:p.S562I,ADAR:NM_001365048:exon3:c.G773T:p.S258I,ADAR:NM_015840:exon3:c.G1658T:p.S553I,ADAR:NM_015841:exon3:c.G1658T:p.S553I,ADAR:NM_001365046:exon4:c.G773T:p.S258I,ADAR:NM_001365047:exon4:c.G773T:p.S258I,ADAR:NM_001365049:exon4:c.G773T:p.S258I	51	chr1	154598529	C	A	AS_SB_TABLE=17,32|2,0;DP=57;ECNT=1;MBQ=36,36;MFRL=215,223;MMQ=60,60;MPOS=19;POPAF=7.30;TLOD=3.34	GT:AD:AF:DP:F1R2:F2R1:SB	0/1	49	2	0.057	51
Pre-Subject 1	chr1	155057888	155057888	G	A	ADAM15	Missense_Mutation	NM_001261464	exon14	c.G1484A	p.G495E	SNP	exonic	ADAM15	.	nonsynonymous SNV	ADAM15:NM_001261464:exon14:c.G1484A:p.G495E,ADAM15:NM_001261465:exon14:c.G1454A:p.G485E,ADAM15:NM_001261466:exon14:c.G1406A:p.G469E,ADAM15:NM_003815:exon14:c.G1454A:p.G485E,ADAM15:NM_207191:exon14:c.G1454A:p.G485E,ADAM15:NM_207194:exon14:c.G1454A:p.G485E,ADAM15:NM_207195:exon14:c.G1454A:p.G485E,ADAM15:NM_207196:exon14:c.G1454A:p.G485E,ADAM15:NM_207197:exon14:c.G1454A:p.G485E	142	chr1	155057888	G	A	AS_SB_TABLE=47,26|49,20;DP=145;ECNT=1;MBQ=36,36;MFRL=191,204;MMQ=60,60;MPOS=21;POPAF=2.95;TLOD=215.50	GT:AD:AF:DP:F1R2:F2R1:SB	0/1	73	69	0.485	142
Pre-Subject 1	chr1	155813743	155813743	G	C	GON4L	Missense_Mutation	NM_001282856	exon10	c.C1343G	p.P448R	SNP	exonic	GON4L	.	nonsynonymous SNV	GON4L:NM_001282856:exon10:c.C1343G:p.P448R,GON4L:NM_001282858:exon10:c.C1343G:p.P448R,GON4L:NM_001282860:exon10:c.C1343G:p.P448R,GON4L:NM_001282861:exon10:c.C1343G:p.P448R,GON4L:NM_032292:exon10:c.C1343G:p.P448R	47	chr1	155813743	G	C	AS_SB_TABLE=21,15|0,11;DP=51;ECNT=1;MBQ=34,14;MFRL=198,202;MMQ=60,60;MPOS=14;POPAF=7.30;TLOD=4.47	GT:AD:AF:DP:F1R2:F2R1:SB	0/1	36	11	0.192	47
Pre-Subject 1	chr1	155962701	155962701	C	T	ARHGEF2	Silent	NM_001162383	exon9	c.G993A	p.A331A	SNP	exonic	ARHGEF2	.	synonymous SNV	ARHGEF2:NM_001162383:exon9:c.G993A:p.A331A,ARHGEF2:NM_001162384:exon9:c.G990A:p.A330A,ARHGEF2:NM_001350110:exon9:c.G912A:p.A304A,ARHGEF2:NM_001350111:exon9:c.G912A:p.A304A,ARHGEF2:NM_001350112:exon9:c.G939A:p.A313A,ARHGEF2:NM_004723:exon9:c.G909A:p.A303A	75	chr1	155962701	C	T	AS_SB_TABLE=29,16|24,6;DP=84;ECNT=1;MBQ=36,36;MFRL=178,151;MMQ=60,60;MPOS=13;POPAF=3.00;TLOD=83.08	GT:AD:AF:DP:F1R2:F2R1:SB	0/1	45	30	0.376	75
Pre-Subject 1	chr1	156138675	156138675	T	G	LMNA	Missense_Mutation	NM_170708	exon10	c.T1796G	p.V599G	SNP	exonic	LMNA	.	nonsynonymous SNV	LMNA:NM_170708:exon10:c.T1796G:p.V599G,LMNA:NM_001257374:exon11:c.T1550G:p.V517G,LMNA:NM_170707:exon11:c.T1886G:p.V629G	69	chr1	156138675	T	G	AS_SB_TABLE=35,25|0,9;DP=72;ECNT=2;MBQ=36,14;MFRL=165,179;MMQ=60,60;MPOS=22;POPAF=7.30;TLOD=3.16	GT:AD:AF:DP:F1R2:F2R1:SB	0/1	60	9	0.089	69
Pre-Subject 1	chr1	156138691	156138691	T	G	LMNA	Silent	NM_170708	exon10	c.T1812G	p.G604G	SNP	exonic	LMNA	.	synonymous SNV	LMNA:NM_170708:exon10:c.T1812G:p.G604G,LMNA:NM_001257374:exon11:c.T1566G:p.G522G,LMNA:NM_170707:exon11:c.T1902G:p.G634G	64	chr1	156138691	T	G	AS_SB_TABLE=28,22|0,14;DP=71;ECNT=2;MBQ=36,14;MFRL=160,200;MMQ=60,60;MPOS=15;POPAF=7.30;TLOD=5.57	GT:AD:AF:DP:F1R2:F2R1:SB	0/1	50	14	0.152	64
Pre-Subject 1	chr1	156163077	156163077	A	C	SEMA4A	Missense_Mutation	NM_001193302	exon8	c.A721C	p.N241H	SNP	exonic	SEMA4A	.	nonsynonymous SNV	SEMA4A:NM_001193302:exon8:c.A721C:p.N241H,SEMA4A:NM_001370567:exon9:c.A1117C:p.N373H,SEMA4A:NM_001370568:exon9:c.A820C:p.N274H,SEMA4A:NM_001370569:exon9:c.A610C:p.N204H,SEMA4A:NM_001193301:exon10:c.A1117C:p.N373H,SEMA4A:NM_022367:exon10:c.A1117C:p.N373H,SEMA4A:NM_001193300:exon11:c.A1117C:p.N373H,SEMA4A:NM_001370571:exon11:c.A610C:p.N204H	69	chr1	156163077	A	C	AS_SB_TABLE=28,37|4,0;DP=74;ECNT=1;MBQ=36,21;MFRL=178,190;MMQ=60,60;MPOS=14;POPAF=7.30;TLOD=4.14	GT:AD:AF:DP:F1R2:F2R1:SB	0/1	65	4	0.061	69
Pre-Subject 1	chr1	156176616	156176616	G	C	SEMA4A	Silent	NM_001193302	exon13	c.G1509C	p.V503V	SNP	exonic	SEMA4A	.	synonymous SNV	SEMA4A:NM_001193302:exon13:c.G1509C:p.V503V,SEMA4A:NM_001370567:exon14:c.G1905C:p.V635V,SEMA4A:NM_001370568:exon14:c.G1608C:p.V536V,SEMA4A:NM_001370569:exon14:c.G1398C:p.V466V,SEMA4A:NM_001193301:exon15:c.G1905C:p.V635V,SEMA4A:NM_022367:exon15:c.G1905C:p.V635V,SEMA4A:NM_001193300:exon16:c.G1905C:p.V635V,SEMA4A:NM_001370571:exon16:c.G1398C:p.V466V	81	chr1	156176616	G	C	AS_SB_TABLE=26,26|14,15;DP=85;ECNT=1;MBQ=36,36;MFRL=193,184;MMQ=60,60;MPOS=17;POPAF=4.61;TLOD=79.17	GT:AD:AF:DP:F1R2:F2R1:SB	0/1	52	29	0.346	81
Pre-Subject 1	chr1	156239549	156239549	C	A	PMF1	Missense_Mutation	NM_001199653	exon5	c.C505A	p.L169I	SNP	exonic	PMF1	.	nonsynonymous SNV	PMF1:NM_001199653:exon5:c.C505A:p.L169I,PMF1:NM_001199654:exon5:c.C572A:p.A191D,PMF1:NM_007221:exon5:c.C566A:p.A189D	69	chr1	156239549	C	A	AS_SB_TABLE=28,37|2,2;DP=70;ECNT=1;MBQ=36,29;MFRL=176,188;MMQ=60,60;MPOS=24;POPAF=7.30;TLOD=8.74	GT:AD:AF:DP:F1R2:F2R1:SB	0/1	65	4	0.073	69
Pre-Subject 1	chr1	156285711	156285711	C	A	TMEM79	Missense_Mutation	NM_032323	exon2	c.C485A	p.P162H	SNP	exonic	TMEM79	.	nonsynonymous SNV	TMEM79:NM_032323:exon2:c.C485A:p.P162H	116	chr1	156285711	C	A	AS_SB_TABLE=17,41|16,42;DP=137;ECNT=2;MBQ=36,36;MFRL=186,196;MMQ=60,60;MPOS=17;POPAF=7.30;TLOD=168.78	GT:AD:AF:DP:F1R2:F2R1:SB	0/1	58	58	0.511	116
Pre-Subject 1	chr1	156285734	156285734	A	C	TMEM79	Missense_Mutation	NM_032323	exon2	c.A508C	p.T170P	SNP	exonic	TMEM79	.	nonsynonymous SNV	TMEM79:NM_032323:exon2:c.A508C:p.T170P	108	chr1	156285734	A	C	AS_SB_TABLE=17,87|4,0;DP=113;ECNT=2;MBQ=36,14;MFRL=198,175;MMQ=60,60;MPOS=22;POPAF=7.30;TLOD=3.94	GT:AD:AF:DP:F1R2:F2R1:SB	0/1	104	4	0.041	108
Pre-Subject 1	chr1	156384556	156384556	-	C	RHBG	Frame_Shift_Ins	NM_020407	exon9	c.1265dupC	p.D425Rfs*18	SNP	exonic	RHBG	.	frameshift insertion	RHBG:NM_020407:exon9:c.1265dupC:p.D425Rfs*18,RHBG:NM_001256395:exon10:c.1058dupC:p.D356Rfs*18,RHBG:NM_001256396:exon10:c.1175dupC:p.D395Rfs*18	38	chr1	156384556	T	TC	AS_SB_TABLE=0,1|11,26;DP=44;ECNT=2;MBQ=36,36;MFRL=197,198;MMQ=60,60;MPOS=20;PON;POPAF=7.30;RPA=7,8;RU=C;STR;TLOD=95.04	GT:AD:AF:DP:F1R2:F2R1:SB	0/1	1	37	0.951	38
Pre-Subject 1	chr1	156384575	156384575	A	G	RHBG	Missense_Mutation	NM_020407	exon9	c.A1283G	p.H428R	SNP	exonic	RHBG	.	nonsynonymous SNV	RHBG:NM_020407:exon9:c.A1283G:p.H428R,RHBG:NM_001256395:exon10:c.A1076G:p.H359R,RHBG:NM_001256396:exon10:c.A1193G:p.H398R	37	chr1	156384575	A	G	AS_SB_TABLE=3,12|6,16;DP=37;ECNT=2;MBQ=36,36;MFRL=208,224;MMQ=60,60;MPOS=21;PON;POPAF=0.197;TLOD=68.47	GT:AD:AF:DP:F1R2:F2R1:SB	0/1	15	22	0.579	37
Pre-Subject 1	chr1	156480948	156480948	G	A	MEF2D	Silent	NM_001271629	exon4	c.C282T	p.N94N	SNP	exonic	MEF2D	.	synonymous SNV	MEF2D:NM_001271629:exon4:c.C282T:p.N94N,MEF2D:NM_005920:exon4:c.C282T:p.N94N	45	chr1	156480948	G	A	AS_SB_TABLE=0,0|21,24;DP=46;ECNT=1;MBQ=0,36;MFRL=0,190;MMQ=60,60;MPOS=18;PON;POPAF=0.250;TLOD=166.29	GT:AD:AF:DP:F1R2:F2R1:SB	0/1	0	45	0.978	45
Pre-Subject 1	chr1	156581456	156581456	G	A	TTC24	Missense_Mutation	NM_001105669	exon1	c.G92A	p.R31Q	SNP	exonic	TTC24	.	nonsynonymous SNV	TTC24:NM_001105669:exon1:c.G92A:p.R31Q	41	chr1	156581456	G	A	AS_SB_TABLE=13,9|10,9;DP=48;ECNT=1;MBQ=36,36;MFRL=194,210;MMQ=60,60;MPOS=24;POPAF=2.19;TLOD=56.96	GT:AD:AF:DP:F1R2:F2R1:SB	0/1	22	19	0.475	41
Pre-Subject 1	chr1	156581607	156581607	C	T	TTC24	Silent	NM_001105669	exon1	c.C243T	p.C81C	SNP	exonic	TTC24	.	synonymous SNV	TTC24:NM_001105669:exon1:c.C243T:p.C81C	62	chr1	156581607	C	T	AS_SB_TABLE=17,12|12,21;DP=67;ECNT=1;MBQ=36,36;MFRL=194,190;MMQ=60,60;MPOS=20;POPAF=3.57;TLOD=99.70	GT:AD:AF:DP:F1R2:F2R1:SB	0/1	29	33	0.536	62
Pre-Subject 1	chr1	156595257	156595257	-	AC	GPATCH4	Frame_Shift_Ins	NM_015590	exon8	c.1083_1084insGT	p.F362Vfs*91	INS	exonic	GPATCH4	.	frameshift insertion	GPATCH4:NM_015590:exon8:c.1083_1084insGT:p.F362Vfs*91,GPATCH4:NM_182679:exon8:c.1068_1069insGT:p.F357Vfs*91	193	chr1	156595257	A	AAC	AS_SB_TABLE=0,0|80,113;DP=209;ECNT=1;MBQ=0,36;MFRL=0,198;MMQ=60,60;MPOS=17;PON;POPAF=2.177e-03;TLOD=837.08	GT:AD:AF:DP:F1R2:F2R1:SB	0/1	0	193	0.995	193
Pre-Subject 1	chr1	156670886	156670886	G	A	NES	Missense_Mutation	NM_006617	exon4	c.C3302T	p.P1101L	SNP	exonic	NES	.	nonsynonymous SNV	NES:NM_006617:exon4:c.C3302T:p.P1101L	23	chr1	156670886	G	A	AS_SB_TABLE=0,0|10,13;DP=24;ECNT=1;MBQ=0,36;MFRL=0,170;MMQ=60,60;MPOS=14;PON;POPAF=0.225;TLOD=82.50	GT:AD:AF:DP:F1R2:F2R1:SB	0/1	0	23	0.96	23
Pre-Subject 1	chr1	156671954	156671954	C	G	NES	Missense_Mutation	NM_006617	exon4	c.G2234C	p.R745T	SNP	exonic	NES	.	nonsynonymous SNV	NES:NM_006617:exon4:c.G2234C:p.R745T	39	chr1	156671954	C	G	AS_SB_TABLE=10,9|6,14;DP=39;ECNT=1;MBQ=36,36;MFRL=235,178;MMQ=60,60;MPOS=18;POPAF=2.36;TLOD=56.09	GT:AD:AF:DP:F1R2:F2R1:SB	0/1	19	20	0.482	39
Pre-Subject 1	chr1	156672996	156672996	A	C	NES	Missense_Mutation	NM_006617	exon4	c.T1192G	p.S398A	SNP	exonic	NES	.	nonsynonymous SNV	NES:NM_006617:exon4:c.T1192G:p.S398A	67	chr1	156672996	A	C	AS_SB_TABLE=30,30|0,7;DP=67;ECNT=5;MBQ=36,18;MFRL=211,181;MMQ=60,60;MPOS=17;POPAF=7.30;TLOD=8.31	GT:AD:AF:DP:F1R2:F2R1:PGT:PID:PS:SB	0|1	60	7	0.083	67
Pre-Subject 1	chr1	156673000	156673000	T	G	NES	Silent	NM_006617	exon4	c.A1188C	p.A396A	SNP	exonic	NES	.	synonymous SNV	NES:NM_006617:exon4:c.A1188C:p.A396A	64	chr1	156673000	T	G	AS_SB_TABLE=32,24|0,8;DP=64;ECNT=5;MBQ=36,14;MFRL=210,205;MMQ=60,60;MPOS=3;POPAF=7.30;TLOD=11.22	GT:AD:AF:DP:F1R2:F2R1:PGT:PID:PS:SB	0|1	56	8	0.104	64
Pre-Subject 1	chr1	156673006	156673006	A	C	NES	Silent	NM_006617	exon4	c.T1182G	p.P394P	SNP	exonic	NES	.	synonymous SNV	NES:NM_006617:exon4:c.T1182G:p.P394P	57	chr1	156673006	A	C	AS_SB_TABLE=31,18|0,8;DP=57;ECNT=5;MBQ=36,14;MFRL=209,205;MMQ=60,60;MPOS=9;POPAF=7.30;TLOD=11.53	GT:AD:AF:DP:F1R2:F2R1:PGT:PID:PS:SB	0|1	49	8	0.116	57
Pre-Subject 1	chr1	156673009	156673009	T	G	NES	Silent	NM_006617	exon4	c.A1179C	p.T393T	SNP	exonic	NES	.	synonymous SNV	NES:NM_006617:exon4:c.A1179C:p.T393T	55	chr1	156673009	T	G	AS_SB_TABLE=29,16|0,10;DP=55;ECNT=5;MBQ=36,14;MFRL=204,205;MMQ=60,60;MPOS=12;POPAF=7.30;TLOD=15.60	GT:AD:AF:DP:F1R2:F2R1:PGT:PID:PS:SB	0|1	45	10	0.158	55
Pre-Subject 1	chr1	156673011	156673011	T	G	NES	Missense_Mutation	NM_006617	exon4	c.A1177C	p.T393P	SNP	exonic	NES	.	nonsynonymous SNV	NES:NM_006617:exon4:c.A1177C:p.T393P	53	chr1	156673011	T	G	AS_SB_TABLE=27,16|0,10;DP=53;ECNT=5;MBQ=36,14;MFRL=209,205;MMQ=60,60;MPOS=14;POPAF=7.30;TLOD=15.60	GT:AD:AF:DP:F1R2:F2R1:PGT:PID:PS:SB	0|1	43	10	0.158	53
Pre-Subject 1	chr1	156848922	156848922	A	C	INSRR	Missense_Mutation	NM_014215	exon7	c.T1570G	p.S524A	SNP	exonic	INSRR	.	nonsynonymous SNV	INSRR:NM_014215:exon7:c.T1570G:p.S524A	59	chr1	156848922	A	C	AS_SB_TABLE=35,19|5,0;DP=64;ECNT=1;MBQ=36,14;MFRL=177,209;MMQ=60,60;MPOS=31;POPAF=7.30;TLOD=3.07	GT:AD:AF:DP:F1R2:F2R1:SB	0/1	54	5	0.076	59
Pre-Subject 1	chr1	156854104	156854104	G	A	INSRR	Silent	NM_014215	exon2	c.C285T	p.R95R	SNP	exonic	INSRR	.	synonymous SNV	INSRR:NM_014215:exon2:c.C285T:p.R95R	85	chr1	156854104	G	A	AS_SB_TABLE=16,28|18,23;DP=92;ECNT=1;MBQ=36,36;MFRL=221,190;MMQ=60,60;MPOS=20;POPAF=2.92;TLOD=135.85	GT:AD:AF:DP:F1R2:F2R1:SB	0/1	44	41	0.483	85
Pre-Subject 1	chr1	156914668	156914668	A	C	PEAR1	Missense_Mutation	NM_001080471	exon23	c.A2984C	p.Q995P	SNP	exonic	PEAR1	.	nonsynonymous SNV	PEAR1:NM_001080471:exon23:c.A2984C:p.Q995P,PEAR1:NM_001353682:exon23:c.A2792C:p.Q931P,PEAR1:NM_001353683:exon24:c.A2792C:p.Q931P	57	chr1	156914668	A	C	AS_SB_TABLE=18,26|13,0;DP=58;ECNT=4;MBQ=36,14;MFRL=176,248;MMQ=60,60;MPOS=30;POPAF=7.30;TLOD=4.10	GT:AD:AF:DP:F1R2:F2R1:SB	0/1	44	13	0.177	57
Pre-Subject 1	chr1	156914690	156914690	A	C	PEAR1	Silent	NM_001080471	exon23	c.A3006C	p.L1002L	SNP	exonic	PEAR1	.	synonymous SNV	PEAR1:NM_001080471:exon23:c.A3006C:p.L1002L,PEAR1:NM_001353682:exon23:c.A2814C:p.L938L,PEAR1:NM_001353683:exon24:c.A2814C:p.L938L	66	chr1	156914690	A	C	AS_SB_TABLE=19,36|11,0;DP=71;ECNT=4;MBQ=36,14;MFRL=197,221;MMQ=60,60;MPOS=18;POPAF=7.30;TLOD=4.84	GT:AD:AF:DP:F1R2:F2R1:SB	0/1	55	11	0.126	66
Pre-Subject 1	chr1	156914707	156914707	A	C	PEAR1	Missense_Mutation	NM_001080471	exon23	c.A3023C	p.D1008A	SNP	exonic	PEAR1	.	nonsynonymous SNV	PEAR1:NM_001080471:exon23:c.A3023C:p.D1008A,PEAR1:NM_001353682:exon23:c.A2831C:p.D944A,PEAR1:NM_001353683:exon24:c.A2831C:p.D944A	63	chr1	156914707	A	C	AS_SB_TABLE=23,37|3,0;DP=63;ECNT=4;MBQ=36,14;MFRL=200,221;MMQ=60,60;MPOS=6;POPAF=7.30;TLOD=3.35	GT:AD:AF:DP:F1R2:F2R1:SB	0/1	60	3	0.051	63
Pre-Subject 1	chr1	156914711	156914711	A	C	PEAR1	Silent	NM_001080471	exon23	c.A3027C	p.S1009S	SNP	exonic	PEAR1	.	synonymous SNV	PEAR1:NM_001080471:exon23:c.A3027C:p.S1009S,PEAR1:NM_001353682:exon23:c.A2835C:p.S945S,PEAR1:NM_001353683:exon24:c.A2835C:p.S945S	59	chr1	156914711	A	C	AS_SB_TABLE=17,35|7,0;DP=63;ECNT=4;MBQ=36,14;MFRL=200,190;MMQ=60,60;MPOS=19;POPAF=7.30;TLOD=8.45	GT:AD:AF:DP:F1R2:F2R1:SB	0/1	52	7	0.109	59
Pre-Subject 1	chr1	156963574	156963574	C	G	ARHGEF11	Missense_Mutation	NM_014784	exon11	c.G864C	p.K288N	SNP	exonic	ARHGEF11	.	nonsynonymous SNV	ARHGEF11:NM_014784:exon11:c.G864C:p.K288N,ARHGEF11:NM_198236:exon12:c.G984C:p.K328N	75	chr1	156963574	C	G	AS_SB_TABLE=41,28|0,6;DP=79;ECNT=2;MBQ=36,14;MFRL=180,174;MMQ=60,60;MPOS=23;POPAF=7.30;TLOD=10.96	GT:AD:AF:DP:F1R2:F2R1:PGT:PID:PS:SB	0|1	69	6	0.08	75
Pre-Subject 1	chr1	156963580	156963580	G	T	ARHGEF11	Missense_Mutation	NM_014784	exon11	c.C858A	p.S286R	SNP	exonic	ARHGEF11	.	nonsynonymous SNV	ARHGEF11:NM_014784:exon11:c.C858A:p.S286R,ARHGEF11:NM_198236:exon12:c.C978A:p.S326R	73	chr1	156963580	G	T	AS_SB_TABLE=38,29|0,6;DP=74;ECNT=2;MBQ=36,23;MFRL=178,174;MMQ=60,60;MPOS=17;POPAF=7.30;TLOD=11.03	GT:AD:AF:DP:F1R2:F2R1:PGT:PID:PS:SB	0|1	67	6	0.082	73
Pre-Subject 1	chr1	156978374	156978374	A	C	ARHGEF11	Missense_Mutation	NM_014784	exon6	c.T340G	p.Y114D	SNP	exonic	ARHGEF11	.	nonsynonymous SNV	ARHGEF11:NM_014784:exon6:c.T340G:p.Y114D,ARHGEF11:NM_198236:exon6:c.T340G:p.Y114D	45	chr1	156978374	A	C	AS_SB_TABLE=1,42|0,2;DP=47;ECNT=1;MBQ=36,34;MFRL=229,282;MMQ=60,60;MPOS=26;POPAF=7.30;TLOD=3.08	GT:AD:AF:DP:F1R2:F2R1:SB	0/1	43	2	0.063	45
Pre-Subject 1	chr1	158093676	158093676	C	A	KIRREL1	Silent	NM_001286349	exon11	c.C1333A	p.R445R	SNP	exonic	KIRREL1	.	synonymous SNV	KIRREL1:NM_001286349:exon11:c.C1333A:p.R445R,KIRREL1:NM_018240:exon13:c.C1633A:p.R545R	65	chr1	158093676	C	A	AS_SB_TABLE=31,32|1,1;DP=65;ECNT=1;MBQ=36,36;MFRL=175,171;MMQ=60,60;MPOS=20;POPAF=7.30;TLOD=3.14	GT:AD:AF:DP:F1R2:F2R1:SB	0/1	63	2	0.049	65
Pre-Subject 1	chr1	159016537	159016537	-	A	IFI16	Frame_Shift_Ins	NM_005531	exon4	c.387dupA	p.S132Ifs*12	SNP	exonic	IFI16	.	frameshift insertion	IFI16:NM_005531:exon4:c.387dupA:p.S132Ifs*12,IFI16:NM_001364867:exon5:c.387dupA:p.S132Ifs*12	35	chr1	159016537	G	GA	AS_SB_TABLE=19,4|9,3;DP=41;ECNT=1;MBQ=36,36;MFRL=212,244;MMQ=60,60;MPOS=25;POPAF=4.61;RPA=7,8;RU=A;STR;TLOD=22.85	GT:AD:AF:DP:F1R2:F2R1:SB	0/1	23	12	0.341	35
Pre-Subject 1	chr1	159855994	159855994	A	C	VSIG8	Missense_Mutation	NM_001013661	exon6	c.T860G	p.V287G	SNP	exonic	VSIG8	.	nonsynonymous SNV	VSIG8:NM_001013661:exon6:c.T860G:p.V287G	48	chr1	159855994	A	C	AS_SB_TABLE=29,11|7,1;DP=49;ECNT=1;MBQ=32,14;MFRL=183,199;MMQ=60,60;MPOS=13;POPAF=7.30;TLOD=4.41	GT:AD:AF:DP:F1R2:F2R1:SB	0/1	40	8	0.105	48
Pre-Subject 1	chr1	160155085	160155085	G	A	ATP1A4	Missense_Mutation	NM_144699	exon3	c.G248A	p.G83D	SNP	exonic	ATP1A4	.	nonsynonymous SNV	ATP1A4:NM_144699:exon3:c.G248A:p.G83D	35	chr1	160155085	G	A	AS_SB_TABLE=14,1|18,2;DP=36;ECNT=1;MBQ=36,36;MFRL=196,223;MMQ=60,60;MPOS=17;PON;POPAF=0.143;TLOD=66.15	GT:AD:AF:DP:F1R2:F2R1:SB	0/1	15	20	0.581	35
Pre-Subject 1	chr1	160174606	160174606	G	A	ATP1A4	Missense_Mutation	NM_144699	exon15	c.G2170A	p.G724R	SNP	exonic	ATP1A4	.	nonsynonymous SNV	ATP1A4:NM_144699:exon15:c.G2170A:p.G724R	141	chr1	160174606	G	A	AS_SB_TABLE=28,51|26,36;DP=151;ECNT=1;MBQ=36,36;MFRL=182,177;MMQ=60,60;MPOS=21;POPAF=2.90;TLOD=191.65	GT:AD:AF:DP:F1R2:F2R1:SB	0/1	79	62	0.451	141
Pre-Subject 1	chr1	160211715	160211715	A	C	PEA15	Missense_Mutation	NM_003768	exon2	c.A171C	p.K57N	SNP	exonic	PEA15	.	nonsynonymous SNV	PEA15:NM_003768:exon2:c.A171C:p.K57N,PEA15:NM_001297577:exon3:c.A171C:p.K57N,PEA15:NM_001297576:exon4:c.A234C:p.K78N	42	chr1	160211715	A	C	AS_SB_TABLE=9,26|0,7;DP=46;ECNT=2;MBQ=32,14;MFRL=204,255;MMQ=60,60;MPOS=18;POPAF=7.30;TLOD=9.43	GT:AD:AF:DP:F1R2:F2R1:SB	0/1	35	7	0.177	42
Pre-Subject 1	chr1	160311992	160311992	T	C	COPA	Missense_Mutation	NM_001098398	exon11	c.A952G	p.K318E	SNP	exonic	COPA	.	nonsynonymous SNV	COPA:NM_001098398:exon11:c.A952G:p.K318E,COPA:NM_004371:exon11:c.A952G:p.K318E	50	chr1	160311992	T	C	AS_SB_TABLE=14,34|0,2;DP=54;ECNT=1;MBQ=36,36;MFRL=194,227;MMQ=60,60;MPOS=34;POPAF=7.30;TLOD=3.41	GT:AD:AF:DP:F1R2:F2R1:SB	0/1	48	2	0.06	50
Pre-Subject 1	chr1	160358161	160358161	A	G	NCSTN	Missense_Mutation	NM_001290186	exon14	c.A1606G	p.T536A	SNP	exonic	NCSTN	.	nonsynonymous SNV	NCSTN:NM_001290186:exon14:c.A1606G:p.T536A,NCSTN:NM_001349729:exon16:c.A1807G:p.T603A,NCSTN:NM_015331:exon17:c.A2020G:p.T674A,NCSTN:NM_001290184:exon18:c.A1960G:p.T654A	109	chr1	160358161	A	G	AS_SB_TABLE=49,57|2,1;DP=115;ECNT=1;MBQ=36,36;MFRL=193,154;MMQ=60,60;MPOS=11;POPAF=7.30;TLOD=4.98	GT:AD:AF:DP:F1R2:F2R1:SB	0/1	106	3	0.038	109
Pre-Subject 1	chr1	160882104	160882104	G	A	ITLN1	Silent	NM_017625	exon4	c.C258T	p.H86H	SNP	exonic	ITLN1	.	synonymous SNV	ITLN1:NM_017625:exon4:c.C258T:p.H86H	55	chr1	160882104	G	A	AS_SB_TABLE=0,0|34,21;DP=59;ECNT=1;MBQ=0,36;MFRL=0,239;MMQ=60,51;MPOS=22;PON;POPAF=0.219;TLOD=194.47	GT:AD:AF:DP:F1R2:F2R1:SB	0/1	0	55	0.983	55
Pre-Subject 1	chr1	161049539	161049539	A	C	ARHGAP30	Missense_Mutation	NM_001287602	exon7	c.T1040G	p.V347G	SNP	exonic	ARHGAP30	.	nonsynonymous SNV	ARHGAP30:NM_001287602:exon7:c.T1040G:p.V347G,ARHGAP30:NM_001287600:exon10:c.T1127G:p.V376G,ARHGAP30:NM_001025598:exon11:c.T1571G:p.V524G,ARHGAP30:NM_181720:exon11:c.T1571G:p.V524G	94	chr1	161049539	A	C	AS_SB_TABLE=41,43|10,0;DP=98;ECNT=1;MBQ=34,14;MFRL=198,175;MMQ=60,60;MPOS=18;POPAF=7.30;TLOD=4.50	GT:AD:AF:DP:F1R2:F2R1:SB	0/1	84	10	0.07	94
Pre-Subject 1	chr1	161196773	161196773	T	C	ADAMTS4	Silent	NM_001320336	exon2	c.A741G	p.A247A	SNP	exonic	ADAMTS4	.	synonymous SNV	ADAMTS4:NM_001320336:exon2:c.A741G:p.A247A,ADAMTS4:NM_005099:exon2:c.A741G:p.A247A	49	chr1	161196773	T	C	AS_SB_TABLE=14,13|14,8;DP=50;ECNT=1;MBQ=36,36;MFRL=227,200;MMQ=60,60;MPOS=16;POPAF=7.30;TLOD=71.78	GT:AD:AF:DP:F1R2:F2R1:SB	0/1	27	22	0.453	49
Pre-Subject 1	chr1	161210676	161210676	G	C	NDUFS2	Missense_Mutation	NM_001166159	exon9	c.G952C	p.V318L	SNP	exonic	NDUFS2	.	nonsynonymous SNV	NDUFS2:NM_001166159:exon9:c.G952C:p.V318L,NDUFS2:NM_004550:exon10:c.G952C:p.V318L	85	chr1	161210676	G	C	AS_SB_TABLE=27,55|1,2;DP=87;ECNT=1;MBQ=36,36;MFRL=185,231;MMQ=60,60;MPOS=12;POPAF=7.30;TLOD=4.78	GT:AD:AF:DP:F1R2:F2R1:SB	0/1	82	3	0.046	85
Pre-Subject 1	chr1	161506437	161506437	C	T	FCGR2A	Silent	NM_001136219	exon3	c.C210T	p.S70S	SNP	exonic	FCGR2A	.	synonymous SNV	FCGR2A:NM_001136219:exon3:c.C210T:p.S70S,FCGR2A:NM_021642:exon3:c.C207T:p.S69S	67	chr1	161506437	C	T	AS_SB_TABLE=18,20|20,9;DP=72;ECNT=1;MBQ=36,36;MFRL=183,203;MMQ=60,60;MPOS=16;POPAF=2.64;TLOD=80.81	GT:AD:AF:DP:F1R2:F2R1:SB	0/1	38	29	0.421	67
Pre-Subject 1	chr1	165210702	165210702	C	T	LMX1A	Silent	NM_001174069	exon6	c.G744A	p.A248A	SNP	exonic	LMX1A	.	synonymous SNV	LMX1A:NM_001174069:exon6:c.G744A:p.A248A,LMX1A:NM_177398:exon6:c.G744A:p.A248A	53	chr1	165210702	C	T	AS_SB_TABLE=16,7|18,12;DP=56;ECNT=1;MBQ=36,36;MFRL=207,218;MMQ=60,60;MPOS=16;POPAF=3.13;TLOD=102.56	GT:AD:AF:DP:F1R2:F2R1:SB	0/1	23	30	0.566	53
Pre-Subject 1	chr1	166992758	166992758	G	A	MAEL	Missense_Mutation	NM_001286377	exon3	c.G305A	p.R102H	SNP	exonic	MAEL	.	nonsynonymous SNV	MAEL:NM_001286377:exon3:c.G305A:p.R102H,MAEL:NM_032858:exon4:c.G398A:p.R133H,MAEL:NM_001286378:exon5:c.G230A:p.R77H	50	chr1	166992758	G	A	AS_SB_TABLE=21,5|13,11;DP=51;ECNT=1;MBQ=36,36;MFRL=193,193;MMQ=60,60;MPOS=16;POPAF=2.36;TLOD=76.76	GT:AD:AF:DP:F1R2:F2R1:SB	0/1	26	24	0.472	50
Pre-Subject 1	chr1	167127798	167127798	T	A	DUSP27	Silent	NM_001080426	exon6	c.T2667A	p.T889T	SNP	exonic	DUSP27	.	synonymous SNV	DUSP27:NM_001080426:exon6:c.T2667A:p.T889T	69	chr1	167127798	T	A	AS_SB_TABLE=20,14|14,21;DP=70;ECNT=1;MBQ=36,36;MFRL=190,225;MMQ=60,60;MPOS=17;POPAF=2.70;TLOD=114.24	GT:AD:AF:DP:F1R2:F2R1:SB	0/1	34	35	0.507	69
Pre-Subject 1	chr1	167856410	167856410	G	A	ADCY10	Silent	NM_001167749	exon14	c.C1467T	p.I489I	SNP	exonic	ADCY10	.	synonymous SNV	ADCY10:NM_001167749:exon14:c.C1467T:p.I489I,ADCY10:NM_001297772:exon17:c.C1650T:p.I550I,ADCY10:NM_018417:exon17:c.C1926T:p.I642I	39	chr1	167856410	G	A	AS_SB_TABLE=2,28|1,8;DP=39;ECNT=1;MBQ=36,36;MFRL=173,230;MMQ=60,60;MPOS=18;POPAF=7.30;TLOD=23.08	GT:AD:AF:DP:F1R2:F2R1:SB	0/1	30	9	0.232	39
Pre-Subject 1	chr1	167924521	167924521	G	A	MPC2	Silent	NM_001143674	exon3	c.C126T	p.F42F	SNP	exonic	MPC2	.	synonymous SNV	MPC2:NM_001143674:exon3:c.C126T:p.F42F,MPC2:NM_015415:exon3:c.C126T:p.F42F	34	chr1	167924521	G	A	AS_SB_TABLE=12,8|8,6;DP=38;ECNT=1;MBQ=36,36;MFRL=169,248;MMQ=60,60;MPOS=17;PON;POPAF=0.399;TLOD=38.83	GT:AD:AF:DP:F1R2:F2R1:SB	0/1	20	14	0.432	34
Pre-Subject 1	chr1	169540948	169541055	TGACTGAGTTCTGGAGAGAGGTTTGTCTGGCTGAGGTCTAGAGAAAGGGTTGTATGGCTGGGGTCTGGAGAAAGGGGCATCTGACCGAGGGCTGGGGAAAGGTTTGTT	-	F5	In_Frame_Del	NM_000130	exon13	c.4035_4142del	p.A1351_P1386del	DEL	exonic	F5	.	nonframeshift deletion	F5:NM_000130:exon13:c.4035_4142del:p.A1351_P1386del	192	chr1	169540947	CTGACTGAGTTCTGGAGAGAGGTTTGTCTGGCTGAGGTCTAGAGAAAGGGTTGTATGGCTGGGGTCTGGAGAAAGGGGCATCTGACCGAGGGCTGGGGAAAGGTTTGTT	C	AS_SB_TABLE=83,98|2,9;DP=299;ECNT=1;MBQ=36,14;MFRL=217,139;MMQ=60,39;MPOS=24;POPAF=3.91;TLOD=4.81	GT:AD:AF:DP:F1R2:F2R1:SB	0/1	181	11	0.046	192
Pre-Subject 1	chr1	169541237	169541237	G	T	F5	Missense_Mutation	NM_000130	exon13	c.C3853A	p.L1285I	SNP	exonic	F5	.	nonsynonymous SNV	F5:NM_000130:exon13:c.C3853A:p.L1285I	87	chr1	169541237	G	T	AS_SB_TABLE=22,26|25,14;DP=89;ECNT=5;MBQ=36,36;MFRL=201,226;MMQ=47,60;MPOS=19;PON;POPAF=0.770;TLOD=97.87	GT:AD:AF:DP:F1R2:F2R1:SB	0/1	48	39	0.436	87
Pre-Subject 1	chr1	169541286	169541286	A	G	F5	Silent	NM_000130	exon13	c.T3804C	p.S1268S	SNP	exonic	F5	.	synonymous SNV	F5:NM_000130:exon13:c.T3804C:p.S1268S	111	chr1	169541286	A	G	AS_SB_TABLE=23,22|39,27;DP=140;ECNT=5;MBQ=32,27;MFRL=216,191;MMQ=60,49;MPOS=18;PON;POPAF=0.533;TLOD=28.84	GT:AD:AF:DP:F1R2:F2R1:SB	0/1	45	66	0.374	111
Pre-Subject 1	chr1	169541370	169541370	A	G	F5	Silent	NM_000130	exon13	c.T3720C	p.L1240L	SNP	exonic	F5	.	synonymous SNV	F5:NM_000130:exon13:c.T3720C:p.L1240L	139	chr1	169541370	A	G	AS_SB_TABLE=89,47|3,0;DP=155;ECNT=5;MBQ=36,14;MFRL=203,257;MMQ=60,60;MPOS=15;POPAF=7.30;TLOD=3.22	GT:AD:AF:DP:F1R2:F2R1:PGT:PID:PS:SB	0|1	136	3	0.023	139
Pre-Subject 1	chr1	169541372	169541372	G	T	F5	Missense_Mutation	NM_000130	exon13	c.C3718A	p.L1240I	SNP	exonic	F5	.	nonsynonymous SNV	F5:NM_000130:exon13:c.C3718A:p.L1240I	133	chr1	169541372	G	T	AS_SB_TABLE=88,43|2,0;DP=218;ECNT=5;MBQ=36,23;MFRL=208,266;MMQ=60,60;MPOS=12;POPAF=7.30;TLOD=3.26	GT:AD:AF:DP:F1R2:F2R1:PGT:PID:PS:SB	0|1	131	2	0.021	133
Pre-Subject 1	chr1	169541409	169541409	A	C	F5	Silent	NM_000130	exon13	c.T3681G	p.G1227G	SNP	exonic	F5	.	synonymous SNV	F5:NM_000130:exon13:c.T3681G:p.G1227G	176	chr1	169541409	A	C	AS_SB_TABLE=87,68|20,1;DP=179;ECNT=5;MBQ=32,14;MFRL=172,281;MMQ=60,60;MPOS=11;POPAF=7.30;TLOD=6.98	GT:AD:AF:DP:F1R2:F2R1:SB	0/1	155	21	0.082	176
Pre-Subject 1	chr1	169703435	169703435	G	T	SELL	Missense_Mutation	NM_000655	exon6	c.C772A	p.Q258K	SNP	exonic	SELL	.	nonsynonymous SNV	SELL:NM_000655:exon6:c.C772A:p.Q258K	18	chr1	169703435	G	T	AS_SB_TABLE=1,14|0,3;DP=20;ECNT=3;MBQ=36,14;MFRL=177,168;MMQ=60,60;MPOS=30;POPAF=7.30;TLOD=5.04	GT:AD:AF:DP:F1R2:F2R1:SB	0/1	15	3	0.195	18
Pre-Subject 1	chr1	170958474	170958474	A	G	MROH9	Missense_Mutation	NM_001163629	exon4	c.A86G	p.N29S	SNP	exonic	MROH9	.	nonsynonymous SNV	MROH9:NM_001163629:exon4:c.A86G:p.N29S,MROH9:NM_025063:exon4:c.A86G:p.N29S	75	chr1	170958474	A	G	AS_SB_TABLE=0,0|30,45;DP=82;ECNT=3;MBQ=0,36;MFRL=0,210;MMQ=60,60;MPOS=21;PON;POPAF=1.07;TLOD=287.81	GT:AD:AF:DP:F1R2:F2R1:SB	0/1	0	75	0.988	75
Pre-Subject 1	chr1	171557431	171557431	G	A	PRRC2C	Silent	NM_015172	exon19	c.G5313A	p.P1771P	SNP	exonic	PRRC2C	.	synonymous SNV	PRRC2C:NM_015172:exon19:c.G5313A:p.P1771P	57	chr1	171557431	G	A	AS_SB_TABLE=0,0|15,42;DP=88;ECNT=1;MBQ=0,36;MFRL=0,195;MMQ=60,60;MPOS=20;PON;POPAF=0.086;TLOD=189.61	GT:AD:AF:DP:F1R2:F2R1:SB	0/1	0	57	0.955	57
Pre-Subject 1	chr1	172578325	172578325	A	G	SUCO	Silent	NM_001282750	exon13	c.A1257G	p.E419E	SNP	exonic	SUCO	.	synonymous SNV	SUCO:NM_001282750:exon13:c.A1257G:p.E419E,SUCO:NM_016227:exon13:c.A1821G:p.E607E,SUCO:NM_014283:exon14:c.A1368G:p.E456E	48	chr1	172578325	A	G	AS_SB_TABLE=16,7|14,11;DP=52;ECNT=1;MBQ=36,36;MFRL=173,198;MMQ=60,60;MPOS=13;PON;POPAF=0.674;TLOD=79.92	GT:AD:AF:DP:F1R2:F2R1:SB	0/1	23	25	0.527	48
Pre-Subject 1	chr1	173909828	173909828	G	T	SERPINC1	Silent	NM_000488	exon5	c.C877A	p.R293R	SNP	exonic	SERPINC1	.	synonymous SNV	SERPINC1:NM_000488:exon5:c.C877A:p.R293R,SERPINC1:NM_001365052:exon6:c.C733A:p.R245R	90	chr1	173909828	G	T	AS_SB_TABLE=49,36|0,5;DP=92;ECNT=7;MBQ=36,14;MFRL=204,259;MMQ=60,60;MPOS=9;POPAF=7.30;TLOD=7.32	GT:AD:AF:DP:F1R2:F2R1:SB	0/1	85	5	0.056	90
Pre-Subject 1	chr1	173909835	173909835	G	C	SERPINC1	Missense_Mutation	NM_000488	exon5	c.C870G	p.F290L	SNP	exonic	SERPINC1	.	nonsynonymous SNV	SERPINC1:NM_000488:exon5:c.C870G:p.F290L,SERPINC1:NM_001365052:exon6:c.C726G:p.F242L	84	chr1	173909835	G	C	AS_SB_TABLE=46,34|0,4;DP=90;ECNT=7;MBQ=36,14;MFRL=206,259;MMQ=60,60;MPOS=16;POPAF=7.30;TLOD=5.39	GT:AD:AF:DP:F1R2:F2R1:SB	0/1	80	4	0.046	84
Pre-Subject 1	chr1	173909840	173909840	T	G	SERPINC1	Missense_Mutation	NM_000488	exon5	c.A865C	p.K289Q	SNP	exonic	SERPINC1	.	nonsynonymous SNV	SERPINC1:NM_000488:exon5:c.A865C:p.K289Q,SERPINC1:NM_001365052:exon6:c.A721C:p.K241Q	85	chr1	173909840	T	G	AS_SB_TABLE=49,34|0,2;DP=85;ECNT=7;MBQ=36,21;MFRL=206,317;MMQ=60,59;MPOS=21;POPAF=7.30;TLOD=3.51	GT:AD:AF:DP:F1R2:F2R1:SB	0/1	83	2	0.034	85
Pre-Subject 1	chr1	173909847	173909847	C	G	SERPINC1	Missense_Mutation	NM_000488	exon5	c.G858C	p.Q286H	SNP	exonic	SERPINC1	.	nonsynonymous SNV	SERPINC1:NM_000488:exon5:c.G858C:p.Q286H,SERPINC1:NM_001365052:exon6:c.G714C:p.Q238H	70	chr1	173909847	C	G	AS_SB_TABLE=39,26|0,5;DP=72;ECNT=7;MBQ=36,14;MFRL=203,258;MMQ=60,60;MPOS=28;POPAF=4.31;TLOD=5.64	GT:AD:AF:DP:F1R2:F2R1:SB	0/1	65	5	0.067	70
Pre-Subject 1	chr1	173909856	173909856	C	A	SERPINC1	Missense_Mutation	NM_000488	exon5	c.G849T	p.M283I	SNP	exonic	SERPINC1	.	nonsynonymous SNV	SERPINC1:NM_000488:exon5:c.G849T:p.M283I,SERPINC1:NM_001365052:exon6:c.G705T:p.M235I	72	chr1	173909856	C	A	AS_SB_TABLE=40,28|0,4;DP=72;ECNT=7;MBQ=36,14;MFRL=207,358;MMQ=60,60;MPOS=33;POPAF=7.30;TLOD=4.51	GT:AD:AF:DP:F1R2:F2R1:SB	0/1	68	4	0.057	72
Pre-Subject 1	chr1	173909868	173909868	A	C	SERPINC1	Missense_Mutation	NM_000488	exon5	c.T837G	p.C279W	SNP	exonic	SERPINC1	.	nonsynonymous SNV	SERPINC1:NM_000488:exon5:c.T837G:p.C279W,SERPINC1:NM_001365052:exon6:c.T693G:p.C231W	70	chr1	173909868	A	C	AS_SB_TABLE=29,28|0,13;DP=77;ECNT=7;MBQ=32,14;MFRL=207,236;MMQ=60,60;MPOS=14;POPAF=7.30;TLOD=8.55	GT:AD:AF:DP:F1R2:F2R1:SB	0/1	57	13	0.133	70
Pre-Subject 1	chr1	177032681	177032681	G	A	ASTN1	Missense_Mutation	NM_001286164	exon3	c.C640T	p.R214W	SNP	exonic	ASTN1	.	nonsynonymous SNV	ASTN1:NM_001286164:exon3:c.C640T:p.R214W,ASTN1:NM_001364856:exon3:c.C640T:p.R214W,ASTN1:NM_004319:exon3:c.C640T:p.R214W,ASTN1:NM_207108:exon3:c.C640T:p.R214W	101	chr1	177032681	G	A	AS_SB_TABLE=52,33|6,10;DP=107;ECNT=1;MBQ=36,36;MFRL=194,208;MMQ=60,60;MPOS=17;POPAF=7.30;TLOD=36.51	GT:AD:AF:DP:F1R2:F2R1:SB	0/1	85	16	0.152	101
Pre-Subject 1	chr1	177960892	177960892	-	AGGGATGTAGAACTTCATGGGTGCTTTGGGACC	CRYZL2P-SEC16B	In_Frame_Ins	NM_001356499	exon7	c.837_838insGGTCCCAAAGCACCCATGAAGTTCTACATCCCT	p.P279_H280insGPKAPMKFYIP	INS	exonic	CRYZL2P-SEC16B;SEC16B	.	nonframeshift insertion	SEC16B:NM_001356499:exon7:c.837_838insGGTCCCAAAGCACCCATGAAGTTCTACATCCCT:p.P279_H280insGPKAPMKFYIP,SEC16B:NM_033127:exon7:c.834_835insGGTCCCAAAGCACCCATGAAGTTCTACATCCCT:p.P278_H279insGPKAPMKFYIP,CRYZL2P-SEC16B:NM_001356506:exon13:c.834_835insGGTCCCAAAGCACCCATGAAGTTCTACATCCCT:p.P278_H279insGPKAPMKFYIP,CRYZL2P-SEC16B:NM_001356505:exon15:c.834_835insGGTCCCAAAGCACCCATGAAGTTCTACATCCCT:p.P278_H279insGPKA…	77	chr1	177960892	G	GAGGGATGTAGAACTTCATGGGTGCTTTGGGACC	AS_SB_TABLE=22,10|27,18;DP=105;ECNT=1;MBQ=36,36;MFRL=183,157;MMQ=60,60;MPOS=22;POPAF=1.34;RPA=1,2;RU=AGGGATGTAGAACTTCATGGGTGCTTTGGGACC;STR;TLOD=158.43	GT:AD:AF:DP:F1R2:F2R1:SB	0/1	32	45	0.516	77
Pre-Subject 1	chr1	179108315	179108315	T	G	ABL2	Silent	NM_001168236	exon11	c.A2889C	p.P963P	SNP	exonic	ABL2	.	synonymous SNV	ABL2:NM_001168236:exon11:c.A2889C:p.P963P,ABL2:NM_001168238:exon12:c.A2580C:p.P860P,ABL2:NM_001168239:exon12:c.A2535C:p.P845P,ABL2:NM_005158:exon12:c.A2907C:p.P969P,ABL2:NM_007314:exon12:c.A2952C:p.P984P,ABL2:NM_001136000:exon13:c.A2598C:p.P866P,ABL2:NM_001168237:exon13:c.A2643C:p.P881P	71	chr1	179108315	T	G	AS_SB_TABLE=38,17|0,16;DP=78;ECNT=1;MBQ=36,14;MFRL=192,187;MMQ=60,60;MPOS=11;POPAF=7.30;TLOD=15.88	GT:AD:AF:DP:F1R2:F2R1:SB	0/1	55	16	0.214	71
Pre-Subject 1	chr1	179534891	179534893	AAG	-	AXDND1	In_Frame_Del	NM_144696	exon25	c.2960_2962del	p.E991del	DEL	exonic	AXDND1	.	nonframeshift deletion	AXDND1:NM_144696:exon25:c.2960_2962del:p.E991del	67	chr1	179534890	AAAG	A	AS_SB_TABLE=21,8|26,12;DP=83;ECNT=2;MBQ=36,36;MFRL=201,181;MMQ=60,60;MPOS=23;PON;POPAF=0.503;RPA=4,3;RU=AAG;STR;TLOD=172.33	GT:AD:AF:DP:F1R2:F2R1:PGT:PID:PS:SB	0|1	29	38	0.594	67
Pre-Subject 1	chr1	179534908	179534908	C	G	AXDND1	Missense_Mutation	NM_144696	exon25	c.C2977G	p.Q993E	SNP	exonic	AXDND1	.	nonsynonymous SNV	AXDND1:NM_144696:exon25:c.C2977G:p.Q993E	83	chr1	179534908	C	G	AS_SB_TABLE=24,8|28,23;DP=91;ECNT=2;MBQ=36,36;MFRL=207,185;MMQ=60,60;MPOS=17;PON;POPAF=7.30;TLOD=192.27	GT:AD:AF:DP:F1R2:F2R1:PGT:PID:PS:SB	0|1	32	51	0.594	83
Pre-Subject 1	chr1	180033877	180033877	G	T	CEP350	Missense_Mutation	NM_014810	exon16	c.G3741T	p.K1247N	SNP	exonic	CEP350	.	nonsynonymous SNV	CEP350:NM_014810:exon16:c.G3741T:p.K1247N	59	chr1	180033877	G	T	AS_SB_TABLE=46,7|5,1;DP=62;ECNT=1;MBQ=36,36;MFRL=236,299;MMQ=60,60;MPOS=28;POPAF=7.30;TLOD=15.04	GT:AD:AF:DP:F1R2:F2R1:SB	0/1	53	6	0.115	59
Pre-Subject 1	chr1	180052999	180052999	C	G	CEP350	Missense_Mutation	NM_014810	exon23	c.C4822G	p.L1608V	SNP	exonic	CEP350	.	nonsynonymous SNV	CEP350:NM_014810:exon23:c.C4822G:p.L1608V	39	chr1	180052999	C	G	AS_SB_TABLE=28,1|10,0;DP=40;ECNT=1;MBQ=36,36;MFRL=218,244;MMQ=60,60;MPOS=23;POPAF=7.30;TLOD=29.56	GT:AD:AF:DP:F1R2:F2R1:SB	0/1	29	10	0.269	39
Pre-Subject 1	chr1	180288468	180288468	A	C	ACBD6	Silent	NM_032360	exon8	c.T744G	p.G248G	SNP	exonic	ACBD6	.	synonymous SNV	ACBD6:NM_032360:exon8:c.T744G:p.G248G	53	chr1	180288468	A	C	AS_SB_TABLE=15,14|10,14;DP=56;ECNT=1;MBQ=36,36;MFRL=223,248;MMQ=60,60;MPOS=17;POPAF=2.27;TLOD=72.76	GT:AD:AF:DP:F1R2:F2R1:SB	0/1	29	24	0.445	53
Pre-Subject 1	chr1	180811456	180811456	T	C	XPR1	Missense_Mutation	NM_001135669	exon7	c.T731C	p.F244S	SNP	exonic	XPR1	.	nonsynonymous SNV	XPR1:NM_001135669:exon7:c.T731C:p.F244S,XPR1:NM_001328662:exon7:c.T731C:p.F244S,XPR1:NM_004736:exon7:c.T731C:p.F244S	110	chr1	180811456	T	C	AS_SB_TABLE=46,60|1,3;DP=112;ECNT=1;MBQ=36,36;MFRL=178,166;MMQ=60,60;MPOS=9;POPAF=7.30;TLOD=5.03	GT:AD:AF:DP:F1R2:F2R1:SB	0/1	106	4	0.039	110
Pre-Subject 1	chr1	181798372	181798372	A	C	CACNA1E	Silent	NM_001205294	exon46	c.A6294C	p.P2098P	SNP	exonic	CACNA1E	.	synonymous SNV	CACNA1E:NM_001205294:exon46:c.A6294C:p.P2098P,CACNA1E:NM_000721:exon47:c.A6351C:p.P2117P,CACNA1E:NM_001205293:exon48:c.A6480C:p.P2160P	88	chr1	181798372	A	C	AS_SB_TABLE=32,46|10,0;DP=94;ECNT=1;MBQ=32,18;MFRL=184,237;MMQ=60,60;MPOS=17;POPAF=7.30;TLOD=8.71	GT:AD:AF:DP:F1R2:F2R1:SB	0/1	78	10	0.089	88
Pre-Subject 1	chr1	182585628	182585628	C	T	RNASEL	Silent	NM_021133	exon2	c.G1179A	p.T393T	SNP	exonic	RNASEL	.	synonymous SNV	RNASEL:NM_021133:exon2:c.G1179A:p.T393T	79	chr1	182585628	C	T	AS_SB_TABLE=21,32|10,16;DP=82;ECNT=1;MBQ=36,36;MFRL=212,212;MMQ=60,60;MPOS=10;POPAF=2.27;TLOD=75.83	GT:AD:AF:DP:F1R2:F2R1:SB	0/1	53	26	0.323	79
Pre-Subject 1	chr1	186308099	186308233	CCCAAGAAGCCTGCCCCCAAGGAGCTTGCACCCACCACCACCAAGGGGCCCACATCCACCACCTCTGACAAGCCTGCTCCAACTACACCTAAGGAGACTGCTCCAACTACCCCCAAGGAGCCTGCACCCACTACC	-	PRG4	In_Frame_Del	NM_001127710	exon4	c.1978_2112del	p.K666_P710del	DEL	exonic	PRG4	.	nonframeshift deletion	PRG4:NM_001127710:exon4:c.1978_2112del:p.K666_P710del,PRG4:NM_001127709:exon5:c.2101_2235del:p.K707_P751del,PRG4:NM_001127708:exon6:c.2257_2391del:p.K759_P803del,PRG4:NM_001303232:exon6:c.2251_2385del:p.K757_P801del,PRG4:NM_005807:exon7:c.2380_2514del:p.K800_P844del	485	chr1	186308098	TCCCAAGAAGCCTGCCCCCAAGGAGCTTGCACCCACCACCACCAAGGGGCCCACATCCACCACCTCTGACAAGCCTGCTCCAACTACACCTAAGGAGACTGCTCCAACTACCCCCAAGGAGCCTGCACCCACTACC	T	AS_SB_TABLE=152,249|58,26;DP=504;ECNT=1;MBQ=36,14;MFRL=167,192;MMQ=60,60;MPOS=12;POPAF=7.30;TLOD=31.05	GT:AD:AF:DP:F1R2:F2R1:SB	0/1	401	84	0.051	485
Pre-Subject 1	chr1	186311540	186311540	C	G	PRG4	Missense_Mutation	NM_001127710	exon7	c.C3335G	p.A1112G	SNP	exonic	PRG4	.	nonsynonymous SNV	PRG4:NM_001127710:exon7:c.C3335G:p.A1112G,PRG4:NM_001127709:exon8:c.C3458G:p.A1153G,PRG4:NM_001127708:exon9:c.C3614G:p.A1205G,PRG4:NM_001303232:exon9:c.C3608G:p.A1203G,PRG4:NM_005807:exon10:c.C3737G:p.A1246G	136	chr1	186311540	C	G	AS_SB_TABLE=46,63|14,13;DP=137;ECNT=1;MBQ=36,36;MFRL=193,186;MMQ=60,60;MPOS=24;POPAF=7.30;TLOD=78.17	GT:AD:AF:DP:F1R2:F2R1:SB	0/1	109	27	0.206	136
Pre-Subject 1	chr1	186312260	186312260	T	C	PRG4	Silent	NM_001127710	exon8	c.T3477C	p.Y1159Y	SNP	exonic	PRG4	.	synonymous SNV	PRG4:NM_001127710:exon8:c.T3477C:p.Y1159Y,PRG4:NM_001127709:exon9:c.T3600C:p.Y1200Y,PRG4:NM_001127708:exon10:c.T3756C:p.Y1252Y,PRG4:NM_001303232:exon10:c.T3750C:p.Y1250Y,PRG4:NM_005807:exon11:c.T3879C:p.Y1293Y	66	chr1	186312260	T	C	AS_SB_TABLE=20,14|21,11;DP=72;ECNT=1;MBQ=36,36;MFRL=194,186;MMQ=60,60;MPOS=15;POPAF=2.03;TLOD=102.41	GT:AD:AF:DP:F1R2:F2R1:SB	0/1	34	32	0.483	66
Pre-Subject 1	chr1	197117973	197117973	T	C	ASPM	Missense_Mutation	NM_001206846	exon17	c.A3881G	p.K1294R	SNP	exonic	ASPM	.	nonsynonymous SNV	ASPM:NM_001206846:exon17:c.A3881G:p.K1294R,ASPM:NM_018136:exon17:c.A3881G:p.K1294R	44	chr1	197117973	T	C	AS_SB_TABLE=4,38|0,2;DP=47;ECNT=1;MBQ=36,36;MFRL=179,139;MMQ=60,60;MPOS=18;POPAF=7.30;TLOD=3.43	GT:AD:AF:DP:F1R2:F2R1:SB	0/1	42	2	0.065	44
Pre-Subject 1	chr1	197645705	197645705	T	C	DENND1B	Silent	NM_001195215	exon9	c.A546G	p.P182P	SNP	exonic	DENND1B	.	synonymous SNV	DENND1B:NM_001195215:exon9:c.A546G:p.P182P,DENND1B:NM_001300858:exon9:c.A456G:p.P152P,DENND1B:NM_144977:exon9:c.A546G:p.P182P	27	chr1	197645705	T	C	AS_SB_TABLE=14,11|2,0;DP=27;ECNT=1;MBQ=36,36;MFRL=163,159;MMQ=60,60;MPOS=19;POPAF=7.30;TLOD=4.31	GT:AD:AF:DP:F1R2:F2R1:SB	0/1	25	2	0.115	27
Pre-Subject 1	chr1	200666490	200666490	C	G	DDX59	Missense_Mutation	NM_001320182	exon1	c.G251C	p.S84T	SNP	exonic	DDX59	.	nonsynonymous SNV	DDX59:NM_001320182:exon1:c.G251C:p.S84T,DDX59:NM_001031725:exon2:c.G251C:p.S84T,DDX59:NM_001320181:exon2:c.G251C:p.S84T,DDX59:NM_001349799:exon2:c.G251C:p.S84T,DDX59:NM_001349800:exon2:c.G251C:p.S84T,DDX59:NM_001349801:exon2:c.G251C:p.S84T,DDX59:NM_001349802:exon2:c.G251C:p.S84T,DDX59:NM_001349803:exon2:c.G251C:p.S84T,DDX59:NM_001349804:exon2:c.G251C:p.S84T	143	chr1	200666490	C	G	AS_SB_TABLE=40,30|48,25;DP=156;ECNT=1;MBQ=36,36;MFRL=223,220;MMQ=60,60;MPOS=21;POPAF=2.71;TLOD=246.53	GT:AD:AF:DP:F1R2:F2R1:SB	0/1	70	73	0.515	143
Pre-Subject 1	chr1	200666593	200666593	C	G	DDX59	Missense_Mutation	NM_001320182	exon1	c.G148C	p.A50P	SNP	exonic	DDX59	.	nonsynonymous SNV	DDX59:NM_001320182:exon1:c.G148C:p.A50P,DDX59:NM_001031725:exon2:c.G148C:p.A50P,DDX59:NM_001320181:exon2:c.G148C:p.A50P,DDX59:NM_001349799:exon2:c.G148C:p.A50P,DDX59:NM_001349800:exon2:c.G148C:p.A50P,DDX59:NM_001349801:exon2:c.G148C:p.A50P,DDX59:NM_001349802:exon2:c.G148C:p.A50P,DDX59:NM_001349803:exon2:c.G148C:p.A50P,DDX59:NM_001349804:exon2:c.G148C:p.A50P	206	chr1	200666593	C	G	AS_SB_TABLE=80,27|70,29;DP=220;ECNT=1;MBQ=36,36;MFRL=209,207;MMQ=60,60;MPOS=20;POPAF=2.71;TLOD=332.71	GT:AD:AF:DP:F1R2:F2R1:SB	0/1	107	99	0.489	206
Pre-Subject 1	chr1	200761077	200761077	C	A	CAMSAP2	Silent	NM_001297707	exon2	c.C378A	p.L126L	SNP	exonic	CAMSAP2	.	synonymous SNV	CAMSAP2:NM_001297707:exon2:c.C378A:p.L126L,CAMSAP2:NM_001297708:exon2:c.C378A:p.L126L,CAMSAP2:NM_203459:exon2:c.C378A:p.L126L	42	chr1	200761077	C	A	AS_SB_TABLE=9,23|0,10;DP=46;ECNT=3;MBQ=36,21;MFRL=214,257;MMQ=60,60;MPOS=20;POPAF=2.09;TLOD=13.53	GT:AD:AF:DP:F1R2:F2R1:SB	0/1	32	10	0.231	42
Pre-Subject 1	chr1	200832807	200832807	A	G	CAMSAP2	Missense_Mutation	NM_001297708	exon6	c.A889G	p.T297A	SNP	exonic	CAMSAP2	.	nonsynonymous SNV	CAMSAP2:NM_001297708:exon6:c.A889G:p.T297A,CAMSAP2:NM_203459:exon6:c.A889G:p.T297A,CAMSAP2:NM_001297707:exon7:c.A922G:p.T308A	45	chr1	200832807	A	G	AS_SB_TABLE=6,19|3,17;DP=48;ECNT=1;MBQ=36,36;MFRL=194,182;MMQ=60,60;MPOS=18;POPAF=2.04;TLOD=58.35	GT:AD:AF:DP:F1R2:F2R1:SB	0/1	25	20	0.441	45
Pre-Subject 1	chr1	201112192	201112192	A	C	CACNA1S	Missense_Mutation	NM_000069	exon1	c.T148G	p.W50G	SNP	exonic	CACNA1S	.	nonsynonymous SNV	CACNA1S:NM_000069:exon1:c.T148G:p.W50G	37	chr1	201112192	A	C	AS_SB_TABLE=31,4|2,0;DP=38;ECNT=8;MBQ=36,14;MFRL=187,316;MMQ=60,60;MPOS=18;POPAF=7.30;TLOD=4.34	GT:AD:AF:DP:F1R2:F2R1:SB	0/1	35	2	0.082	37
Pre-Subject 1	chr1	201208794	201208955	GGGAGCAAGGCAGATTATAGGGATGGTGTAGGGGGTTCTGGGGCAATGGGGTCAATGGATGAAGCAGGTTATAGGAAAGATTTAGGGGCTCCTGAGGGAATAAGTTCAGGGAGCAAGGCAGATTATAGGGGTGGTTTACAGGATTCCAGGGAAGCGGGTTCA	-	IGFN1	In_Frame_Del	NM_001164586	exon12	c.3901_4062del	p.R1307_Y1360del	DEL	exonic	IGFN1	.	nonframeshift deletion	IGFN1:NM_001164586:exon12:c.3901_4062del:p.R1307_Y1360del	320	chr1	201208793	GGGGAGCAAGGCAGATTATAGGGATGGTGTAGGGGGTTCTGGGGCAATGGGGTCAATGGATGAAGCAGGTTATAGGAAAGATTTAGGGGCTCCTGAGGGAATAAGTTCAGGGAGCAAGGCAGATTATAGGGGTGGTTTACAGGATTCCAGGGAAGCGGGTTCA	G	AS_SB_TABLE=167,109|19,25;DP=324;ECNT=2;MBQ=34,32;MFRL=197,232;MMQ=60,60;MPOS=11;POPAF=7.30;TLOD=4.17	GT:AD:AF:DP:F1R2:F2R1:SB	0/1	276	44	0.02	320
Pre-Subject 1	chr1	201208821	201208821	G	T	IGFN1	Missense_Mutation	NM_001164586	exon12	c.G3928T	p.V1310L	SNP	exonic	IGFN1	.	nonsynonymous SNV	IGFN1:NM_001164586:exon12:c.G3928T:p.V1310L	71	chr1	201208821	G	T	AS_SB_TABLE=46,16|8,1;DP=124;ECNT=2;MBQ=36,14;MFRL=190,252;MMQ=60,60;MPOS=9;POPAF=7.30;TLOD=9.73	GT:AD:AF:DP:F1R2:F2R1:SB	0/1	62	9	0.115	71
Pre-Subject 1	chr1	201209423	201209423	A	G	IGFN1	Silent	NM_001164586	exon12	c.A4530G	p.K1510K	SNP	exonic	IGFN1	.	synonymous SNV	IGFN1:NM_001164586:exon12:c.A4530G:p.K1510K	86	chr1	201209423	A	G	AS_SB_TABLE=64,12|7,3;DP=95;ECNT=1;MBQ=32,14;MFRL=200,237;MMQ=60,60;MPOS=7;POPAF=7.30;TLOD=3.02	GT:AD:AF:DP:F1R2:F2R1:SB	0/1	76	10	0.067	86
Pre-Subject 1	chr1	201209837	201209837	A	G	IGFN1	Missense_Mutation	NM_001164586	exon12	c.A4944G	p.I1648M	SNP	exonic	IGFN1	.	nonsynonymous SNV	IGFN1:NM_001164586:exon12:c.A4944G:p.I1648M	200	chr1	201209837	A	G	AS_SB_TABLE=90,76|13,21;DP=289;ECNT=1;MBQ=32,32;MFRL=166,231;MMQ=43,35;MPOS=20;PON;POPAF=0.907;TLOD=74.99	GT:AD:AF:DP:F1R2:F2R1:SB	0/1	166	34	0.187	200
Pre-Subject 1	chr1	201209850	201209957	AAGGCAGGTTTTAGGGATGGTTTAGGGAGTTCTGGGGAAATGGGGTCAATGGATGAGGCAGGTTATAGGAAGAATTTGGGGGCTCCTGAGGGAATAGGTTCAGGGAGT	-	IGFN1	In_Frame_Del	NM_001164586	exon12	c.4957_5064del	p.G1664_S1699del	DEL	exonic	IGFN1	.	nonframeshift deletion	IGFN1:NM_001164586:exon12:c.4957_5064del:p.G1664_S1699del	347	chr1	201209849	CAAGGCAGGTTTTAGGGATGGTTTAGGGAGTTCTGGGGAAATGGGGTCAATGGATGAGGCAGGTTATAGGAAGAATTTGGGGGCTCCTGAGGGAATAGGTTCAGGGAGT	C	AS_SB_TABLE=165,174|6,2;DP=478;ECNT=2;MBQ=20,26;MFRL=211,76;MMQ=40,28;MPOS=15;PON;POPAF=3.38;TLOD=7.26	GT:AD:AF:DP:F1R2:F2R1:SB	0/1	339	8	0.03	347
Pre-Subject 1	chr1	201209922	201209922	A	G	IGFN1	Missense_Mutation	NM_001164586	exon12	c.A5029G	p.N1677D	SNP	exonic	IGFN1	.	nonsynonymous SNV	IGFN1:NM_001164586:exon12:c.A5029G:p.N1677D	134	chr1	201209922	A	G	AS_SB_TABLE=74,47|7,6;DP=182;ECNT=2;MBQ=36,36;MFRL=212,242;MMQ=49,34;MPOS=9;PON;POPAF=0.607;TLOD=14.57	GT:AD:AF:DP:F1R2:F2R1:SB	0/1	121	13	0.088	134
Pre-Subject 1	chr1	201211017	201211017	G	A	IGFN1	Missense_Mutation	NM_001164586	exon12	c.G6124A	p.E2042K	SNP	exonic	IGFN1	.	nonsynonymous SNV	IGFN1:NM_001164586:exon12:c.G6124A:p.E2042K	121	chr1	201211017	G	A	AS_SB_TABLE=60,47|6,8;DP=127;ECNT=4;MBQ=24,36;MFRL=127,202;MMQ=40,29;MPOS=6;PON;POPAF=0.433;TLOD=24.37	GT:AD:AF:DP:F1R2:F2R1:PGT:PID:PS:SB	0|1	107	14	0.123	121
Pre-Subject 1	chr1	201211020	201211020	A	G	IGFN1	Missense_Mutation	NM_001164586	exon12	c.A6127G	p.R2043G	SNP	exonic	IGFN1	.	nonsynonymous SNV	IGFN1:NM_001164586:exon12:c.A6127G:p.R2043G	123	chr1	201211020	A	G	AS_SB_TABLE=64,47|5,7;DP=123;ECNT=4;MBQ=20,32;MFRL=136,202;MMQ=40,28;MPOS=3;PON;POPAF=7.30;TLOD=19.72	GT:AD:AF:DP:F1R2:F2R1:PGT:PID:PS:SB	0|1	111	12	0.102	123
Pre-Subject 1	chr1	201211025	201211025	A	G	IGFN1	Missense_Mutation	NM_001164586	exon12	c.A6132G	p.I2044M	SNP	exonic	IGFN1	.	nonsynonymous SNV	IGFN1:NM_001164586:exon12:c.A6132G:p.I2044M	112	chr1	201211025	A	G	AS_SB_TABLE=63,42|2,5;DP=112;ECNT=4;MBQ=32,32;MFRL=148,202;MMQ=40,28;MPOS=6;PON;POPAF=0.461;TLOD=9.12	GT:AD:AF:DP:F1R2:F2R1:PGT:PID:PS:SB	0|1	105	7	0.06	112
Pre-Subject 1	chr1	201211141	201211141	G	A	IGFN1	Missense_Mutation	NM_001164586	exon12	c.G6248A	p.G2083E	SNP	exonic	IGFN1	.	nonsynonymous SNV	IGFN1:NM_001164586:exon12:c.G6248A:p.G2083E	140	chr1	201211141	G	A	AS_SB_TABLE=0,1|73,66;DP=150;ECNT=4;MBQ=0,36;MFRL=184,170;MMQ=60,57;MPOS=18;POPAF=1.06;TLOD=390.78	GT:AD:AF:DP:F1R2:F2R1:SB	0/1	1	139	0.992	140
Pre-Subject 1	chr1	201211373	201211373	T	A	IGFN1	Missense_Mutation	NM_001164586	exon12	c.T6480A	p.F2160L	SNP	exonic	IGFN1	.	nonsynonymous SNV	IGFN1:NM_001164586:exon12:c.T6480A:p.F2160L	177	chr1	201211373	T	A	AS_SB_TABLE=85,81|11,0;DP=186;ECNT=2;MBQ=32,14;MFRL=197,177;MMQ=51,37;MPOS=15;PON;POPAF=7.30;TLOD=4.72	GT:AD:AF:DP:F1R2:F2R1:PGT:PID:PS:SB	0|1	166	11	0.033	177
Pre-Subject 1	chr1	201211574	201211574	G	C	IGFN1	Silent	NM_001164586	exon12	c.G6681C	p.G2227G	SNP	exonic	IGFN1	.	synonymous SNV	IGFN1:NM_001164586:exon12:c.G6681C:p.G2227G	277	chr1	201211574	G	C	AS_SB_TABLE=149,122|6,0;DP=317;ECNT=1;MBQ=36,14;MFRL=201,214;MMQ=49,40;MPOS=6;POPAF=7.30;TLOD=3.20	GT:AD:AF:DP:F1R2:F2R1:SB	0/1	271	6	0.023	277
Pre-Subject 1	chr1	202742779	202742779	C	T	KDM5B	Missense_Mutation	NM_001347591	exon16	c.G2215A	p.E739K	SNP	exonic	KDM5B	.	nonsynonymous SNV	KDM5B:NM_001347591:exon16:c.G2215A:p.E739K,KDM5B:NM_006618:exon17:c.G2350A:p.E784K,KDM5B:NM_001314042:exon18:c.G2458A:p.E820K	38	chr1	202742779	C	T	AS_SB_TABLE=5,31|1,1;DP=42;ECNT=1;MBQ=36,34;MFRL=188,294;MMQ=60,60;MPOS=14;POPAF=7.30;TLOD=3.13	GT:AD:AF:DP:F1R2:F2R1:SB	0/1	36	2	0.074	38
Pre-Subject 1	chr1	203060299	203060299	A	T	PPFIA4	Missense_Mutation	NM_001304331	exon22	c.A2666T	p.D889V	SNP	exonic	PPFIA4	.	nonsynonymous SNV	PPFIA4:NM_001304331:exon22:c.A2666T:p.D889V,PPFIA4:NM_001304332:exon22:c.A2666T:p.D889V	32	chr1	203060299	A	T	AS_SB_TABLE=22,8|1,1;DP=32;ECNT=1;MBQ=36,36;MFRL=184,256;MMQ=60,60;MPOS=10;POPAF=7.30;TLOD=4.04	GT:AD:AF:DP:F1R2:F2R1:SB	0/1	30	2	0.095	32
Pre-Subject 1	chr1	203217822	203217822	-	AGACCATGGCCCCGCCCAGTCCCT	CHIT1	Nonsense_Mutation	NM_001256125	exon9	c.1015_1016insAGGGACTGGGCGGGGCCATGGTCT	p.W339_N447del	INS	exonic	CHIT1	.	stopgain	CHIT1:NM_001256125:exon9:c.1015_1016insAGGGACTGGGCGGGGCCATGGTCT:p.W339_N447del,CHIT1:NM_003465:exon10:c.1072_1073insAGGGACTGGGCGGGGCCATGGTCT:p.W358_N466del	16	chr1	203217822	C	CAGACCATGGCCCCGCCCAGTCCCT	AS_SB_TABLE=2,5|2,7;DP=30;ECNT=1;MBQ=36,36;MFRL=315,183;MMQ=60,60;MPOS=30;PON;POPAF=0.757;RPA=1,2;RU=AGACCATGGCCCCGCCCAGTCCCT;STR;TLOD=34.39	GT:AD:AF:DP:F1R2:F2R1:SB	0/1	7	9	0.527	16
Pre-Subject 1	chr1	203307309	203307309	C	T	BTG2	Silent	NM_006763	exon2	c.C348T	p.D116D	SNP	exonic	BTG2	.	synonymous SNV	BTG2:NM_006763:exon2:c.C348T:p.D116D	44	chr1	203307309	C	T	AS_SB_TABLE=11,9|12,12;DP=45;ECNT=1;MBQ=36,36;MFRL=183,216;MMQ=60,60;MPOS=18;POPAF=2.18;TLOD=73.51	GT:AD:AF:DP:F1R2:F2R1:SB	0/1	20	24	0.532	44
Pre-Subject 1	chr1	203770858	203770858	C	T	LAX1	Silent	NM_001136190	exon2	c.C72T	p.S24S	SNP	exonic	LAX1	.	synonymous SNV	LAX1:NM_001136190:exon2:c.C72T:p.S24S,LAX1:NM_017773:exon2:c.C120T:p.S40S	43	chr1	203770858	C	T	AS_SB_TABLE=19,22|1,1;DP=46;ECNT=1;MBQ=36,36;MFRL=180,241;MMQ=60,60;MPOS=18;POPAF=3.83;TLOD=3.61	GT:AD:AF:DP:F1R2:F2R1:SB	0/1	41	2	0.069	43
Pre-Subject 1	chr1	203774442	203774442	C	G	LAX1	Missense_Mutation	NM_001136190	exon5	c.C910G	p.H304D	SNP	exonic	LAX1	.	nonsynonymous SNV	LAX1:NM_001136190:exon5:c.C910G:p.H304D,LAX1:NM_001282878:exon5:c.C730G:p.H244D,LAX1:NM_017773:exon5:c.C958G:p.H320D	66	chr1	203774442	C	G	AS_SB_TABLE=40,24|1,1;DP=67;ECNT=1;MBQ=36,36;MFRL=225,170;MMQ=60,60;MPOS=23;POPAF=7.30;TLOD=3.46	GT:AD:AF:DP:F1R2:F2R1:SB	0/1	64	2	0.045	66
Pre-Subject 1	chr1	204149863	204149863	G	T	ETNK2	Missense_Mutation	NM_001297760	exon2	c.C358A	p.L120M	SNP	exonic	ETNK2	.	nonsynonymous SNV	ETNK2:NM_001297760:exon2:c.C358A:p.L120M,ETNK2:NM_001297762:exon2:c.C358A:p.L120M,ETNK2:NM_018208:exon2:c.C358A:p.L120M	26	chr1	204149863	G	T	AS_SB_TABLE=12,12|0,2;DP=27;ECNT=1;MBQ=36,34;MFRL=156,151;MMQ=60,60;MPOS=23;POPAF=7.30;TLOD=3.86	GT:AD:AF:DP:F1R2:F2R1:SB	0/1	24	2	0.111	26
Pre-Subject 1	chr1	204410868	204410868	C	A	PPP1R15B	Nonsense_Mutation	NM_032833	exon1	c.G544T	p.G182X	SNP	exonic	PPP1R15B	.	stopgain	PPP1R15B:NM_032833:exon1:c.G544T:p.G182X	47	chr1	204410868	C	A	AS_SB_TABLE=21,24|2,0;DP=47;ECNT=1;MBQ=36,34;MFRL=220,189;MMQ=60,60;MPOS=13;POPAF=7.30;TLOD=3.09	GT:AD:AF:DP:F1R2:F2R1:SB	0/1	45	2	0.064	47
Pre-Subject 1	chr1	204619540	204619540	G	A	LRRN2	Silent	NM_201630	exon2	c.C453T	p.N151N	SNP	exonic	LRRN2	.	synonymous SNV	LRRN2:NM_201630:exon2:c.C453T:p.N151N,LRRN2:NM_006338:exon3:c.C453T:p.N151N	40	chr1	204619540	G	A	AS_SB_TABLE=6,8|11,15;DP=41;ECNT=1;MBQ=36,36;MFRL=197,226;MMQ=60,60;MPOS=17;POPAF=2.05;TLOD=88.26	GT:AD:AF:DP:F1R2:F2R1:SB	0/1	14	26	0.634	40
Pre-Subject 1	chr1	205159564	205159564	G	T	DSTYK	Missense_Mutation	NM_015375	exon9	c.C2221A	p.L741I	SNP	exonic	DSTYK	.	nonsynonymous SNV	DSTYK:NM_015375:exon9:c.C2221A:p.L741I,DSTYK:NM_199462:exon9:c.C2221A:p.L741I	41	chr1	205159564	G	T	AS_SB_TABLE=1,38|2,0;DP=42;ECNT=6;MBQ=36,36;MFRL=191,173;MMQ=60,42;MPOS=18;POPAF=7.30;TLOD=4.42	GT:AD:AF:DP:F1R2:F2R1:PGT:PID:PS:SB	0|1	39	2	0.068	41
Pre-Subject 1	chr1	205159570	205159570	G	T	DSTYK	Silent	NM_015375	exon9	c.C2215A	p.R739R	SNP	exonic	DSTYK	.	synonymous SNV	DSTYK:NM_015375:exon9:c.C2215A:p.R739R,DSTYK:NM_199462:exon9:c.C2215A:p.R739R	40	chr1	205159570	G	T	AS_SB_TABLE=1,37|2,0;DP=40;ECNT=6;MBQ=32,25;MFRL=193,173;MMQ=60,42;MPOS=18;PON;POPAF=7.30;TLOD=4.46	GT:AD:AF:DP:F1R2:F2R1:PGT:PID:PS:SB	0|1	38	2	0.07	40
Pre-Subject 1	chr1	205159583	205159583	C	A	DSTYK	Missense_Mutation	NM_015375	exon9	c.G2202T	p.M734I	SNP	exonic	DSTYK	.	nonsynonymous SNV	DSTYK:NM_015375:exon9:c.G2202T:p.M734I,DSTYK:NM_199462:exon9:c.G2202T:p.M734I	33	chr1	205159583	C	A	AS_SB_TABLE=2,30|1,0;DP=33;ECNT=6;MBQ=36,14;MFRL=200,180;MMQ=60,24;MPOS=35;POPAF=7.30;TLOD=4.66	GT:AD:AF:DP:F1R2:F2R1:PGT:PID:PS:SB	0|1	32	1	0.081	33
Pre-Subject 1	chr1	205529326	205529326	A	C	CDK18	Missense_Mutation	NM_002596	exon12	c.A1075C	p.T359P	SNP	exonic	CDK18	.	nonsynonymous SNV	CDK18:NM_002596:exon12:c.A1075C:p.T359P,CDK18:NM_212502:exon12:c.A1075C:p.T359P,CDK18:NM_212503:exon12:c.A1165C:p.T389P	24	chr1	205529326	A	C	AS_SB_TABLE=15,2|7,0;DP=29;ECNT=2;MBQ=21,14;MFRL=188,206;MMQ=60,60;MPOS=20;POPAF=7.30;TLOD=7.12	GT:AD:AF:DP:F1R2:F2R1:SB	0/1	17	7	0.276	24
Pre-Subject 1	chr1	206098122	206098122	C	T	RHEX	Missense_Mutation	NM_001007544	exon3	c.C53T	p.S18F	SNP	exonic	RHEX	.	nonsynonymous SNV	RHEX:NM_001007544:exon3:c.C53T:p.S18F,RHEX:NM_001369490:exon3:c.C53T:p.S18F	38	chr1	206098122	C	T	AS_SB_TABLE=21,15|1,1;DP=39;ECNT=1;MBQ=36,34;MFRL=184,214;MMQ=60,60;MPOS=14;POPAF=7.30;TLOD=3.39	GT:AD:AF:DP:F1R2:F2R1:SB	0/1	36	2	0.079	38
Pre-Subject 1	chr1	206116175	206116175	A	C	AVPR1B	Missense_Mutation	NM_000707	exon1	c.T716G	p.V239G	SNP	exonic	AVPR1B	.	nonsynonymous SNV	AVPR1B:NM_000707:exon1:c.T716G:p.V239G	26	chr1	206116175	A	C	AS_SB_TABLE=9,15|2,0;DP=26;ECNT=2;MBQ=36,14;MFRL=228,302;MMQ=60,60;MPOS=32;POPAF=7.30;TLOD=3.42	GT:AD:AF:DP:F1R2:F2R1:PGT:PID:PS:SB	0|1	24	2	0.107	26
Pre-Subject 1	chr1	206116182	206116182	A	C	AVPR1B	Missense_Mutation	NM_000707	exon1	c.T709G	p.W237G	SNP	exonic	AVPR1B	.	nonsynonymous SNV	AVPR1B:NM_000707:exon1:c.T709G:p.W237G	29	chr1	206116182	A	C	AS_SB_TABLE=11,16|2,0;DP=29;ECNT=2;MBQ=36,14;MFRL=227,302;MMQ=60,60;MPOS=25;POPAF=7.30;TLOD=3.28	GT:AD:AF:DP:F1R2:F2R1:PGT:PID:PS:SB	0|1	27	2	0.096	29
Pre-Subject 1	chr1	206730749	206730749	C	A	MAPKAPK2	Silent	NM_004759	exon6	c.C753A	p.V251V	SNP	exonic	MAPKAPK2	.	synonymous SNV	MAPKAPK2:NM_004759:exon6:c.C753A:p.V251V,MAPKAPK2:NM_032960:exon6:c.C753A:p.V251V	23	chr1	206730749	C	A	AS_SB_TABLE=10,13|0,0;DP=24;ECNT=11;MBQ=36,0;MFRL=201,0;MMQ=60,60;MPOS=50;POPAF=7.30;TLOD=20.17	GT:AD:AF:DP:F1R2:F2R1:PGT:PID:PS:SB	0|1	23	0	0.259	23
Pre-Subject 1	chr1	206730753	206730753	A	T	MAPKAPK2	Missense_Mutation	NM_004759	exon6	c.A757T	p.M253L	SNP	exonic	MAPKAPK2	.	nonsynonymous SNV	MAPKAPK2:NM_004759:exon6:c.A757T:p.M253L,MAPKAPK2:NM_032960:exon6:c.A757T:p.M253L	23	chr1	206730753	A	T	AS_SB_TABLE=10,13|0,0;DP=23;ECNT=11;MBQ=36,0;MFRL=201,0;MMQ=60,60;MPOS=50;POPAF=7.30;TLOD=20.17	GT:AD:AF:DP:F1R2:F2R1:PGT:PID:PS:SB	0|1	23	0	0.259	23
Pre-Subject 1	chr1	206730755	206730755	G	T	MAPKAPK2	Missense_Mutation	NM_004759	exon6	c.G759T	p.M253I	SNP	exonic	MAPKAPK2	.	nonsynonymous SNV	MAPKAPK2:NM_004759:exon6:c.G759T:p.M253I,MAPKAPK2:NM_032960:exon6:c.G759T:p.M253I	22	chr1	206730755	G	T	AS_SB_TABLE=9,13|0,0;DP=22;ECNT=11;MBQ=36,0;MFRL=200,0;MMQ=60,60;MPOS=50;POPAF=7.30;TLOD=20.17	GT:AD:AF:DP:F1R2:F2R1:PGT:PID:PS:SB	0|1	22	0	0.259	22
Pre-Subject 1	chr1	206730758	206730758	C	A	MAPKAPK2	Nonsense_Mutation	NM_004759	exon6	c.C762A	p.Y254X	SNP	exonic	MAPKAPK2	.	stopgain	MAPKAPK2:NM_004759:exon6:c.C762A:p.Y254X,MAPKAPK2:NM_032960:exon6:c.C762A:p.Y254X	21	chr1	206730758	C	A	AS_SB_TABLE=9,12|0,0;DP=21;ECNT=11;MBQ=36,0;MFRL=201,0;MMQ=60,60;MPOS=50;POPAF=7.30;TLOD=20.31	GT:AD:AF:DP:F1R2:F2R1:PGT:PID:PS:SB	0|1	21	0	0.269	21
Pre-Subject 1	chr1	207359549	207359549	A	C	CD55	Missense_Mutation	NM_000574	exon10	c.A1085C	p.H362P	SNP	exonic	CD55	.	nonsynonymous SNV	CD55:NM_000574:exon10:c.A1085C:p.H362P	65	chr1	207359549	A	C	AS_SB_TABLE=60,3|2,0;DP=66;ECNT=3;MBQ=36,21;MFRL=189,247;MMQ=60,40;MPOS=19;POPAF=7.30;TLOD=3.85	GT:AD:AF:DP:F1R2:F2R1:PGT:PID:PS:SB	0|1	63	2	0.045	65
Pre-Subject 1	chr1	207359551	207359551	A	C	CD55	Missense_Mutation	NM_000574	exon10	c.A1087C	p.T363P	SNP	exonic	CD55	.	nonsynonymous SNV	CD55:NM_000574:exon10:c.A1087C:p.T363P,CD55:NM_001114752:exon11:c.A1205C:p.H402P,CD55:NM_001300903:exon11:c.A1202C:p.H401P	65	chr1	207359551	A	C	AS_SB_TABLE=60,3|2,0;DP=70;ECNT=3;MBQ=36,14;MFRL=189,247;MMQ=60,40;MPOS=17;POPAF=7.30;TLOD=3.84	GT:AD:AF:DP:F1R2:F2R1:PGT:PID:PS:SB	0|1	63	2	0.044	65
Pre-Subject 1	chr1	207580520	207580520	G	T	CR1	Missense_Mutation	NM_000573	exon23	c.G3773T	p.C1258F	SNP	exonic	CR1	.	nonsynonymous SNV	CR1:NM_000573:exon23:c.G3773T:p.C1258F,CR1:NM_000651:exon31:c.G5123T:p.C1708F	56	chr1	207580520	G	T	AS_SB_TABLE=43,11|2,0;DP=56;ECNT=5;MBQ=36,14;MFRL=207,229;MMQ=60,50;MPOS=26;POPAF=7.30;TLOD=3.21	GT:AD:AF:DP:F1R2:F2R1:SB	0/1	54	2	0.046	56
Pre-Subject 1	chr1	208217070	208217070	T	C	PLXNA2	Missense_Mutation	NM_025179	exon2	c.A853G	p.K285E	SNP	exonic	PLXNA2	.	nonsynonymous SNV	PLXNA2:NM_025179:exon2:c.A853G:p.K285E	125	chr1	208217070	T	C	AS_SB_TABLE=43,31|29,22;DP=135;ECNT=1;MBQ=36,36;MFRL=191,191;MMQ=60,60;MPOS=22;POPAF=3.65;TLOD=157.25	GT:AD:AF:DP:F1R2:F2R1:SB	0/1	74	51	0.419	125
Pre-Subject 1	chr1	210241558	210241558	A	C	SERTAD4	Missense_Mutation	NM_019605	exon4	c.A292C	p.T98P	SNP	exonic	SERTAD4	.	nonsynonymous SNV	SERTAD4:NM_019605:exon4:c.A292C:p.T98P	35	chr1	210241558	A	C	AS_SB_TABLE=26,5|4,0;DP=36;ECNT=5;MBQ=32,18;MFRL=211,282;MMQ=60,60;MPOS=31;POPAF=7.30;TLOD=5.78	GT:AD:AF:DP:F1R2:F2R1:SB	0/1	31	4	0.126	35
Pre-Subject 1	chr1	210241565	210241565	C	A	SERTAD4	Nonsense_Mutation	NM_019605	exon4	c.C299A	p.S100X	SNP	exonic	SERTAD4	.	stopgain	SERTAD4:NM_019605:exon4:c.C299A:p.S100X	35	chr1	210241565	C	A	AS_SB_TABLE=26,5|4,0;DP=37;ECNT=5;MBQ=36,14;MFRL=213,191;MMQ=60,60;MPOS=24;POPAF=7.30;TLOD=3.29	GT:AD:AF:DP:F1R2:F2R1:SB	0/1	31	4	0.095	35
Pre-Subject 1	chr1	219210525	219210525	T	C	LYPLAL1	Missense_Mutation	NM_001300769	exon3	c.T202C	p.F68L	SNP	exonic	LYPLAL1	.	nonsynonymous SNV	LYPLAL1:NM_001300769:exon3:c.T202C:p.F68L	38	chr1	219210525	T	C	AS_SB_TABLE=0,0|34,4;DP=39;ECNT=2;MBQ=0,36;MFRL=0,143;MMQ=60,60;MPOS=21;PON;POPAF=0.014;TLOD=130.84	GT:AD:AF:DP:F1R2:F2R1:SB	0/1	0	38	0.973	38
Pre-Subject 1	chr1	220880312	220880312	C	T	HLX	Missense_Mutation	NM_021958	exon1	c.C455T	p.S152L	SNP	exonic	HLX	.	nonsynonymous SNV	HLX:NM_021958:exon1:c.C455T:p.S152L	54	chr1	220880312	C	T	AS_SB_TABLE=17,20|8,9;DP=58;ECNT=4;MBQ=36,36;MFRL=197,164;MMQ=60,60;MPOS=19;POPAF=7.30;TLOD=42.49	GT:AD:AF:DP:F1R2:F2R1:SB	0/1	37	17	0.298	54
Pre-Subject 1	chr1	220880333	220880333	A	C	HLX	Missense_Mutation	NM_021958	exon1	c.A476C	p.N159T	SNP	exonic	HLX	.	nonsynonymous SNV	HLX:NM_021958:exon1:c.A476C:p.N159T	47	chr1	220880333	A	C	AS_SB_TABLE=8,30|9,0;DP=53;ECNT=4;MBQ=36,14;MFRL=203,180;MMQ=60,60;MPOS=10;POPAF=7.30;TLOD=3.14	GT:AD:AF:DP:F1R2:F2R1:SB	0/1	38	9	0.174	47
Pre-Subject 1	chr1	220880339	220880339	A	C	HLX	Missense_Mutation	NM_021958	exon1	c.A482C	p.H161P	SNP	exonic	HLX	.	nonsynonymous SNV	HLX:NM_021958:exon1:c.A482C:p.H161P	50	chr1	220880339	A	C	AS_SB_TABLE=9,33|8,0;DP=53;ECNT=4;MBQ=36,14;MFRL=203,177;MMQ=60,60;MPOS=4;POPAF=7.30;TLOD=5.28	GT:AD:AF:DP:F1R2:F2R1:SB	0/1	42	8	0.146	50
Pre-Subject 1	chr1	220880342	220880342	A	C	HLX	Missense_Mutation	NM_021958	exon1	c.A485C	p.H162P	SNP	exonic	HLX	.	nonsynonymous SNV	HLX:NM_021958:exon1:c.A485C:p.H162P	53	chr1	220880342	A	C	AS_SB_TABLE=12,34|7,0;DP=55;ECNT=4;MBQ=36,14;MFRL=203,174;MMQ=60,60;MPOS=22;POPAF=7.30;TLOD=6.69	GT:AD:AF:DP:F1R2:F2R1:SB	0/1	46	7	0.12	53
Pre-Subject 1	chr1	222943130	222943130	G	A	DISP1	Missense_Mutation	NM_001369594	exon2	c.G307A	p.E103K	SNP	exonic	DISP1	.	nonsynonymous SNV	DISP1:NM_001369594:exon2:c.G307A:p.E103K,DISP1:NM_032890:exon4:c.G307A:p.E103K	97	chr1	222943130	G	A	AS_SB_TABLE=32,14|26,25;DP=98;ECNT=2;MBQ=36,36;MFRL=261,208;MMQ=60,60;MPOS=13;PON;POPAF=0.810;TLOD=195.34	GT:AD:AF:DP:F1R2:F2R1:PGT:PID:PS:SB	0|1	46	51	0.51	97
Pre-Subject 1	chr1	222943132	222943132	G	T	DISP1	Missense_Mutation	NM_001369594	exon2	c.G309T	p.E103D	SNP	exonic	DISP1	.	nonsynonymous SNV	DISP1:NM_001369594:exon2:c.G309T:p.E103D,DISP1:NM_032890:exon4:c.G309T:p.E103D	97	chr1	222943132	G	T	AS_SB_TABLE=32,14|26,25;DP=99;ECNT=2;MBQ=36,36;MFRL=261,208;MMQ=60,60;MPOS=13;PON;POPAF=0.810;TLOD=195.33	GT:AD:AF:DP:F1R2:F2R1:PGT:PID:PS:SB	0|1	46	51	0.51	97
Pre-Subject 1	chr1	225838660	225838660	A	C	EPHX1	Missense_Mutation	NM_000120	exon4	c.A371C	p.D124A	SNP	exonic	EPHX1	.	nonsynonymous SNV	EPHX1:NM_000120:exon4:c.A371C:p.D124A,EPHX1:NM_001136018:exon4:c.A371C:p.D124A,EPHX1:NM_001291163:exon4:c.A371C:p.D124A	39	chr1	225838660	A	C	AS_SB_TABLE=28,7|4,0;DP=43;ECNT=3;MBQ=32,14;MFRL=210,186;MMQ=60,60;MPOS=31;POPAF=7.30;TLOD=5.43	GT:AD:AF:DP:F1R2:F2R1:SB	0/1	35	4	0.104	39
Pre-Subject 1	chr1	225838662	225838662	A	C	EPHX1	Missense_Mutation	NM_000120	exon4	c.A373C	p.I125L	SNP	exonic	EPHX1	.	nonsynonymous SNV	EPHX1:NM_000120:exon4:c.A373C:p.I125L,EPHX1:NM_001136018:exon4:c.A373C:p.I125L,EPHX1:NM_001291163:exon4:c.A373C:p.I125L	36	chr1	225838662	A	C	AS_SB_TABLE=23,7|6,0;DP=39;ECNT=3;MBQ=32,14;MFRL=209,198;MMQ=60,60;MPOS=31;POPAF=7.30;TLOD=9.94	GT:AD:AF:DP:F1R2:F2R1:SB	0/1	30	6	0.176	36
Pre-Subject 1	chr1	225838666	225838666	A	C	EPHX1	Missense_Mutation	NM_000120	exon4	c.A377C	p.H126P	SNP	exonic	EPHX1	.	nonsynonymous SNV	EPHX1:NM_000120:exon4:c.A377C:p.H126P,EPHX1:NM_001136018:exon4:c.A377C:p.H126P,EPHX1:NM_001291163:exon4:c.A377C:p.H126P	34	chr1	225838666	A	C	AS_SB_TABLE=24,7|3,0;DP=38;ECNT=3;MBQ=32,14;MFRL=208,271;MMQ=60,60;MPOS=25;POPAF=7.30;TLOD=4.01	GT:AD:AF:DP:F1R2:F2R1:SB	0/1	31	3	0.131	34
Pre-Subject 1	chr1	225999277	225999277	G	A	SDE2	Silent	NM_152608	exon1	c.C36T	p.G12G	SNP	exonic	SDE2	.	synonymous SNV	SDE2:NM_152608:exon1:c.C36T:p.G12G	98	chr1	225999277	G	A	AS_SB_TABLE=34,22|18,24;DP=106;ECNT=1;MBQ=36,36;MFRL=185,178;MMQ=60,60;MPOS=17;POPAF=2.72;TLOD=127.96	GT:AD:AF:DP:F1R2:F2R1:SB	0/1	56	42	0.436	98
Pre-Subject 1	chr1	227655214	227655214	C	A	ZNF678	Missense_Mutation	NM_001367911	exon3	c.C1036A	p.Q346K	SNP	exonic	ZNF678	.	nonsynonymous SNV	ZNF678:NM_001367911:exon3:c.C1036A:p.Q346K,ZNF678:NM_001367909:exon4:c.C964A:p.Q322K,ZNF678:NM_178549:exon4:c.C1129A:p.Q377K,ZNF678:NM_001367910:exon5:c.C964A:p.Q322K	183	chr1	227655214	C	A	AS_SB_TABLE=61,107|14,1;DP=304;ECNT=1;MBQ=32,14;MFRL=211,251;MMQ=60,60;MPOS=19;POPAF=7.30;TLOD=7.44	GT:AD:AF:DP:F1R2:F2R1:SB	0/1	168	15	0.042	183
Pre-Subject 1	chr1	228158780	228158780	A	C	GJC2	Missense_Mutation	NM_020435	exon2	c.A1022C	p.E341A	SNP	exonic	GJC2	.	nonsynonymous SNV	GJC2:NM_020435:exon2:c.A1022C:p.E341A	14	chr1	228158780	A	C	AS_SB_TABLE=8,0|6,0;DP=14;ECNT=1;MBQ=14,14;MFRL=195,195;MMQ=60,60;MPOS=17;POPAF=7.30;TLOD=6.83	GT:AD:AF:DP:F1R2:F2R1:SB	0/1	8	6	0.432	14
Pre-Subject 1	chr1	228316969	228316969	C	T	OBSCN	Missense_Mutation	NM_001098623	exon51	c.C13546T	p.R4516W	SNP	exonic	OBSCN	.	nonsynonymous SNV	OBSCN:NM_001098623:exon51:c.C13546T:p.R4516W,OBSCN:NM_052843:exon51:c.C13546T:p.R4516W,OBSCN:NM_001271223:exon62:c.C16417T:p.R5473W	26	chr1	228316969	C	T	AS_SB_TABLE=1,17|0,8;DP=26;ECNT=2;MBQ=36,36;MFRL=212,283;MMQ=60,60;MPOS=30;PON;POPAF=0.352;TLOD=22.03	GT:AD:AF:DP:F1R2:F2R1:SB	0/1	18	8	0.32	26
Pre-Subject 1	chr1	228317467	228317467	T	G	OBSCN	Missense_Mutation	NM_001098623	exon52	c.T13565G	p.L4522R	SNP	exonic	OBSCN	.	nonsynonymous SNV	OBSCN:NM_001098623:exon52:c.T13565G:p.L4522R,OBSCN:NM_052843:exon52:c.T13565G:p.L4522R,OBSCN:NM_001271223:exon63:c.T16436G:p.L5479R	35	chr1	228317467	T	G	AS_SB_TABLE=24,9|2,0;DP=39;ECNT=3;MBQ=36,14;MFRL=191,159;MMQ=60,60;MPOS=31;POPAF=7.30;TLOD=9.79	GT:AD:AF:DP:F1R2:F2R1:SB	0/1	33	2	0.174	35
Pre-Subject 1	chr1	228376019	228376019	A	C	OBSCN	Missense_Mutation	NM_001098623	exon99	c.A22798C	p.T7600P	SNP	exonic	OBSCN	.	nonsynonymous SNV	OBSCN:NM_001098623:exon99:c.A22798C:p.T7600P,OBSCN:NM_001271223:exon110:c.A25669C:p.T8557P	52	chr1	228376019	A	C	AS_SB_TABLE=35,13|4,0;DP=55;ECNT=1;MBQ=34,27;MFRL=197,243;MMQ=60,60;MPOS=2;POPAF=7.30;TLOD=3.76	GT:AD:AF:DP:F1R2:F2R1:SB	0/1	48	4	0.086	52
Pre-Subject 1	chr1	229458180	229458180	C	T	NUP133	Missense_Mutation	NM_018230	exon21	c.G2961A	p.M987I	SNP	exonic	NUP133	.	nonsynonymous SNV	NUP133:NM_018230:exon21:c.G2961A:p.M987I	31	chr1	229458180	C	T	AS_SB_TABLE=28,1|1,1;DP=33;ECNT=1;MBQ=36,36;MFRL=208,266;MMQ=60,60;MPOS=20;POPAF=7.30;TLOD=3.97	GT:AD:AF:DP:F1R2:F2R1:SB	0/1	29	2	0.09	31
Pre-Subject 1	chr1	229498216	229498216	G	A	NUP133	Nonsense_Mutation	NM_018230	exon6	c.C739T	p.Q247X	SNP	exonic	NUP133	.	stopgain	NUP133:NM_018230:exon6:c.C739T:p.Q247X	58	chr1	229498216	G	A	AS_SB_TABLE=31,20|5,2;DP=60;ECNT=1;MBQ=36,36;MFRL=196,199;MMQ=60,60;MPOS=20;POPAF=7.30;TLOD=18.29	GT:AD:AF:DP:F1R2:F2R1:SB	0/1	51	7	0.133	58
Pre-Subject 1	chr1	229651283	229651283	G	A	URB2	Missense_Mutation	NM_001314021	exon8	c.G4198A	p.V1400M	SNP	exonic	URB2	.	nonsynonymous SNV	URB2:NM_001314021:exon8:c.G4198A:p.V1400M,URB2:NM_014777:exon8:c.G4198A:p.V1400M	126	chr1	229651283	G	A	AS_SB_TABLE=25,39|35,27;DP=134;ECNT=1;MBQ=36,36;MFRL=193,179;MMQ=60,60;MPOS=19;POPAF=2.22;TLOD=199.40	GT:AD:AF:DP:F1R2:F2R1:SB	0/1	64	62	0.488	126
Pre-Subject 1	chr1	230255258	230255258	G	T	GALNT2	Missense_Mutation	NM_001291866	exon11	c.G936T	p.E312D	SNP	exonic	GALNT2	.	nonsynonymous SNV	GALNT2:NM_001291866:exon11:c.G936T:p.E312D,GALNT2:NM_004481:exon11:c.G1050T:p.E350D	99	chr1	230255258	G	T	AS_SB_TABLE=33,46|9,11;DP=108;ECNT=1;MBQ=36,36;MFRL=198,185;MMQ=60,60;MPOS=22;POPAF=7.30;TLOD=49.70	GT:AD:AF:DP:F1R2:F2R1:SB	0/1	79	20	0.194	99
Pre-Subject 1	chr1	234609263	234609263	A	G	IRF2BP2	Missense_Mutation	NM_001077397	exon1	c.T232C	p.S78P	SNP	exonic	IRF2BP2	.	nonsynonymous SNV	IRF2BP2:NM_001077397:exon1:c.T232C:p.S78P,IRF2BP2:NM_182972:exon1:c.T232C:p.S78P	19	chr1	234609263	A	G	AS_SB_TABLE=0,0|13,6;DP=20;ECNT=1;MBQ=0,32;MFRL=0,145;MMQ=60,60;MPOS=11;POPAF=0.138;TLOD=60.09	GT:AD:AF:DP:F1R2:F2R1:SB	0/1	0	19	0.943	19
Pre-Subject 1	chr1	235746438	235746438	G	A	LYST	Missense_Mutation	NM_000081	exon29	c.C7870T	p.R2624W	SNP	exonic	LYST	.	nonsynonymous SNV	LYST:NM_000081:exon29:c.C7870T:p.R2624W,LYST:NM_001301365:exon29:c.C7870T:p.R2624W	115	chr1	235746438	G	A	AS_SB_TABLE=19,41|22,33;DP=129;ECNT=1;MBQ=36,36;MFRL=177,209;MMQ=60,60;MPOS=21;POPAF=2.42;TLOD=184.41	GT:AD:AF:DP:F1R2:F2R1:SB	0/1	60	55	0.48	115
Pre-Subject 1	chr1	235985381	235985381	T	G	NID1	Missense_Mutation	NM_002508	exon15	c.A3053C	p.Q1018P	SNP	exonic	NID1	.	nonsynonymous SNV	NID1:NM_002508:exon15:c.A3053C:p.Q1018P	49	chr1	235985381	T	G	AS_SB_TABLE=41,5|2,1;DP=50;ECNT=1;MBQ=36,32;MFRL=212,135;MMQ=60,60;MPOS=13;POPAF=7.30;TLOD=5.47	GT:AD:AF:DP:F1R2:F2R1:SB	0/1	46	3	0.078	49
Pre-Subject 1	chr1	236065056	236065056	G	A	NID1	Silent	NM_002508	exon1	c.C24T	p.I8I	SNP	exonic	NID1	.	synonymous SNV	NID1:NM_002508:exon1:c.C24T:p.I8I	28	chr1	236065056	G	A	AS_SB_TABLE=9,15|2,2;DP=31;ECNT=1;MBQ=36,36;MFRL=203,213;MMQ=60,60;MPOS=19;POPAF=7.30;TLOD=10.20	GT:AD:AF:DP:F1R2:F2R1:SB	0/1	24	4	0.172	28
Pre-Subject 1	chr1	236585828	236585828	A	C	HEATR1	Missense_Mutation	NM_018072	exon16	c.T2041G	p.L681V	SNP	exonic	HEATR1	.	nonsynonymous SNV	HEATR1:NM_018072:exon16:c.T2041G:p.L681V	51	chr1	236585828	A	C	AS_SB_TABLE=18,2|24,7;DP=55;ECNT=1;MBQ=36,36;MFRL=212,181;MMQ=60,60;MPOS=19;POPAF=2.02;TLOD=96.65	GT:AD:AF:DP:F1R2:F2R1:SB	0/1	20	31	0.592	51
Pre-Subject 1	chr1	236861137	236861137	C	A	MTR	Missense_Mutation	NM_001291940	exon19	c.C835A	p.H279N	SNP	exonic	MTR	.	nonsynonymous SNV	MTR:NM_001291940:exon19:c.C835A:p.H279N,MTR:NM_000254:exon20:c.C2056A:p.H686N	31	chr1	236861137	C	A	AS_SB_TABLE=26,2|3,0;DP=32;ECNT=5;MBQ=36,14;MFRL=174,166;MMQ=60,40;MPOS=8;POPAF=7.30;TLOD=4.43	GT:AD:AF:DP:F1R2:F2R1:PGT:PID:PS:SB	0|1	28	3	0.108	31
Pre-Subject 1	chr1	236861140	236861140	A	T	MTR	Missense_Mutation	NM_001291940	exon19	c.A838T	p.I280F	SNP	exonic	MTR	.	nonsynonymous SNV	MTR:NM_001291940:exon19:c.A838T:p.I280F,MTR:NM_000254:exon20:c.A2059T:p.I687F	33	chr1	236861140	A	T	AS_SB_TABLE=28,2|3,0;DP=33;ECNT=5;MBQ=36,14;MFRL=178,166;MMQ=60,40;MPOS=5;POPAF=7.30;TLOD=4.34	GT:AD:AF:DP:F1R2:F2R1:PGT:PID:PS:SB	0|1	30	3	0.101	33
Pre-Subject 1	chr1	236861143	236861143	A	T	MTR	Missense_Mutation	NM_001291940	exon19	c.A841T	p.I281F	SNP	exonic	MTR	.	nonsynonymous SNV	MTR:NM_001291940:exon19:c.A841T:p.I281F,MTR:NM_000254:exon20:c.A2062T:p.I688F	34	chr1	236861143	A	T	AS_SB_TABLE=29,2|3,0;DP=34;ECNT=5;MBQ=36,14;MFRL=179,166;MMQ=60,40;MPOS=2;POPAF=7.30;TLOD=4.29	GT:AD:AF:DP:F1R2:F2R1:PGT:PID:PS:SB	0|1	31	3	0.098	34
Pre-Subject 1	chr1	236861146	236861146	G	T	MTR	Nonsense_Mutation	NM_001291940	exon19	c.G844T	p.E282X	SNP	exonic	MTR	.	stopgain	MTR:NM_001291940:exon19:c.G844T:p.E282X,MTR:NM_000254:exon20:c.G2065T:p.E689X	35	chr1	236861146	G	T	AS_SB_TABLE=29,3|3,0;DP=38;ECNT=5;MBQ=36,14;MFRL=178,166;MMQ=60,40;MPOS=17;POPAF=7.30;TLOD=4.23	GT:AD:AF:DP:F1R2:F2R1:PGT:PID:PS:SB	0|1	32	3	0.095	35
Pre-Subject 1	chr1	237591819	237591819	G	A	RYR2	Missense_Mutation	NM_001035	exon32	c.G4241A	p.R1414Q	SNP	exonic	RYR2	.	nonsynonymous SNV	RYR2:NM_001035:exon32:c.G4241A:p.R1414Q	63	chr1	237591819	G	A	AS_SB_TABLE=22,39|1,1;DP=65;ECNT=1;MBQ=36,36;MFRL=182,195;MMQ=60,60;MPOS=17;POPAF=7.30;TLOD=3.12	GT:AD:AF:DP:F1R2:F2R1:SB	0/1	61	2	0.048	63
Pre-Subject 1	chr1	237634898	237634898	C	A	RYR2	Missense_Mutation	NM_001035	exon44	c.C6698A	p.A2233D	SNP	exonic	RYR2	.	nonsynonymous SNV	RYR2:NM_001035:exon44:c.C6698A:p.A2233D	36	chr1	237634898	C	A	AS_SB_TABLE=31,3|2,0;DP=38;ECNT=1;MBQ=36,34;MFRL=199,171;MMQ=60,60;MPOS=13;POPAF=7.30;TLOD=3.37	GT:AD:AF:DP:F1R2:F2R1:SB	0/1	34	2	0.078	36
Pre-Subject 1	chr1	240801495	240801495	A	G	RGS7	Missense_Mutation	NM_001364886	exon17	c.T1373C	p.M458T	SNP	exonic	RGS7	.	nonsynonymous SNV	RGS7:NM_001364886:exon17:c.T1373C:p.M458T,RGS7:NM_002924:exon17:c.T1373C:p.M458T	37	chr1	240801495	A	G	AS_SB_TABLE=19,16|1,1;DP=39;ECNT=1;MBQ=36,34;MFRL=192,227;MMQ=60,60;MPOS=24;POPAF=7.30;TLOD=3.34	GT:AD:AF:DP:F1R2:F2R1:SB	0/1	35	2	0.076	37
Pre-Subject 1	chr1	241879152	241879152	C	T	EXO1	Missense_Mutation	NM_003686	exon11	c.C1918T	p.P640S	SNP	exonic	EXO1	.	nonsynonymous SNV	EXO1:NM_003686:exon11:c.C1918T:p.P640S,EXO1:NM_006027:exon11:c.C1918T:p.P640S,EXO1:NM_001319224:exon12:c.C1915T:p.P639S,EXO1:NM_130398:exon13:c.C1918T:p.P640S	60	chr1	241879152	C	T	AS_SB_TABLE=17,15|10,18;DP=62;ECNT=1;MBQ=36,36;MFRL=224,222;MMQ=60,60;MPOS=22;POPAF=2.23;TLOD=90.54	GT:AD:AF:DP:F1R2:F2R1:SB	0/1	32	28	0.468	60
Pre-Subject 1	chr1	244581811	244581811	C	T	CATSPERE	Nonsense_Mutation	NM_001242340	exon9	c.C1513T	p.Q505X	SNP	exonic	CATSPERE	.	stopgain	CATSPERE:NM_001242340:exon9:c.C1513T:p.Q505X,CATSPERE:NM_001130957:exon12:c.C1966T:p.Q656X,CATSPERE:NM_173807:exon12:c.C1966T:p.Q656X	45	chr1	244581811	C	T	AS_SB_TABLE=16,20|1,8;DP=46;ECNT=1;MBQ=36,36;MFRL=186,171;MMQ=60,60;MPOS=18;POPAF=7.30;TLOD=21.85	GT:AD:AF:DP:F1R2:F2R1:SB	0/1	36	9	0.211	45
Pre-Subject 1	chr1	246565996	246565996	G	A	TFB2M	Missense_Mutation	NM_022366	exon1	c.C143T	p.S48F	SNP	exonic	TFB2M	.	nonsynonymous SNV	TFB2M:NM_022366:exon1:c.C143T:p.S48F	41	chr1	246565996	G	A	AS_SB_TABLE=5,16|6,14;DP=47;ECNT=1;MBQ=36,36;MFRL=197,230;MMQ=60,60;MPOS=15;POPAF=2.28;TLOD=64.69	GT:AD:AF:DP:F1R2:F2R1:SB	0/1	21	20	0.491	41
Pre-Subject 1	chr1	246987242	246987242	G	T	ZNF695	Missense_Mutation	NM_020394	exon4	c.C1273A	p.Q425K	SNP	exonic	ZNF695	.	nonsynonymous SNV	ZNF695:NM_020394:exon4:c.C1273A:p.Q425K	139	chr1	246987242	G	T	AS_SB_TABLE=44,83|0,12;DP=151;ECNT=1;MBQ=36,14;MFRL=199,211;MMQ=60,60;MPOS=15;POPAF=7.30;TLOD=5.23	GT:AD:AF:DP:F1R2:F2R1:SB	0/1	127	12	0.051	139
Pre-Subject 1	chr1	246988255	246988255	A	G	ZNF695	Missense_Mutation	NM_001204221	exon4	c.T260C	p.V87A	SNP	exonic	ZNF695	.	nonsynonymous SNV	ZNF695:NM_001204221:exon4:c.T260C:p.V87A,ZNF695:NM_020394:exon4:c.T260C:p.V87A	50	chr1	246988255	A	G	AS_SB_TABLE=0,0|0,50;DP=54;ECNT=1;MBQ=0,36;MFRL=0,228;MMQ=60,60;MPOS=20;PON;POPAF=0.229;TLOD=195.49	GT:AD:AF:DP:F1R2:F2R1:SB	0/1	0	50	0.981	50
Pre-Subject 1	chr1	247104036	247104036	G	C	ZNF669	Missense_Mutation	NM_024804	exon1	c.C164G	p.A55G	SNP	exonic	ZNF669	.	nonsynonymous SNV	ZNF669:NM_024804:exon1:c.C164G:p.A55G	14	chr1	247104036	G	C	AS_SB_TABLE=5,6|3,0;DP=17;ECNT=1;MBQ=36,21;MFRL=226,177;MMQ=60,60;MPOS=7;POPAF=7.30;TLOD=5.69	GT:AD:AF:DP:F1R2:F2R1:SB	0/1	11	3	0.25	14
Pre-Subject 1	chr1	247424298	247424298	A	C	NLRP3	Silent	NM_001127462	exon3	c.A855C	p.P285P	SNP	exonic	NLRP3	.	synonymous SNV	NLRP3:NM_001127462:exon3:c.A855C:p.P285P,NLRP3:NM_001243133:exon3:c.A849C:p.P283P,NLRP3:NM_004895:exon3:c.A855C:p.P285P,NLRP3:NM_183395:exon3:c.A855C:p.P285P,NLRP3:NM_001127461:exon4:c.A855C:p.P285P,NLRP3:NM_001079821:exon5:c.A855C:p.P285P	44	chr1	247424298	A	C	AS_SB_TABLE=7,32|4,1;DP=45;ECNT=1;MBQ=36,14;MFRL=216,219;MMQ=60,60;MPOS=2;POPAF=7.30;TLOD=9.85	GT:AD:AF:DP:F1R2:F2R1:SB	0/1	39	5	0.145	44
Pre-Subject 1	chr1	247672587	247672587	T	C	OR13G1	Missense_Mutation	NM_001005487	exon1	c.A455G	p.N152S	SNP	exonic	OR13G1	.	nonsynonymous SNV	OR13G1:NM_001005487:exon1:c.A455G:p.N152S	71	chr1	247672587	T	C	AS_SB_TABLE=13,23|14,21;DP=74;ECNT=1;MBQ=36,36;MFRL=235,200;MMQ=60,60;MPOS=18;POPAF=3.40;TLOD=104.32	GT:AD:AF:DP:F1R2:F2R1:SB	0/1	36	35	0.483	71
Pre-Subject 1	chr1	247949443	247949443	G	T	OR2L8	Missense_Mutation	NM_001001963	exon1	c.G586T	p.G196C	SNP	exonic	OR2L8	.	nonsynonymous SNV	OR2L8:NM_001001963:exon1:c.G586T:p.G196C	62	chr1	247949443	G	T	AS_SB_TABLE=0,0|33,29;DP=67;ECNT=3;MBQ=0,36;MFRL=0,221;MMQ=60,40;MPOS=15;PON;POPAF=0.110;TLOD=218.67	GT:AD:AF:DP:F1R2:F2R1:SB	0/1	0	62	0.985	62
Pre-Subject 1	chr1	247949469	247949469	C	T	OR2L8	Silent	NM_001001963	exon1	c.C612T	p.I204I	SNP	exonic	OR2L8	.	synonymous SNV	OR2L8:NM_001001963:exon1:c.C612T:p.I204I	65	chr1	247949469	C	T	AS_SB_TABLE=0,0|28,37;DP=71;ECNT=3;MBQ=0,36;MFRL=0,203;MMQ=60,40;MPOS=13;PON;POPAF=0.121;TLOD=281.60	GT:AD:AF:DP:F1R2:F2R1:SB	0/1	0	65	0.985	65
Pre-Subject 1	chr1	248038668	248038668	G	A	OR2L2	Missense_Mutation	NM_001004686	exon1	c.G401A	p.R134H	SNP	exonic	OR2L2	.	nonsynonymous SNV	OR2L2:NM_001004686:exon1:c.G401A:p.R134H	266	chr1	248038668	G	A	AS_SB_TABLE=59,92|40,75;DP=284;ECNT=1;MBQ=36,36;MFRL=210,194;MMQ=60,60;MPOS=18;POPAF=3.65;TLOD=372.44	GT:AD:AF:DP:F1R2:F2R1:SB	0/1	151	115	0.438	266
Pre-Subject 1	chr1	248100282	248100282	G	C	OR2L13	Missense_Mutation	NM_001304535	exon2	c.G907C	p.V303L	SNP	exonic	OR2L13	.	nonsynonymous SNV	OR2L13:NM_001304535:exon2:c.G907C:p.V303L,OR2L13:NM_175911:exon3:c.G907C:p.V303L	55	chr1	248100282	G	C	AS_SB_TABLE=13,18|7,17;DP=59;ECNT=1;MBQ=36,36;MFRL=199,187;MMQ=60,60;MPOS=16;POPAF=3.71;TLOD=78.89	GT:AD:AF:DP:F1R2:F2R1:SB	0/1	31	24	0.454	55
Pre-Subject 1	chr1	248180688	248180688	T	C	OR2M2	Missense_Mutation	NM_001004688	exon1	c.T703C	p.C235R	SNP	exonic	OR2M2	.	nonsynonymous SNV	OR2M2:NM_001004688:exon1:c.T703C:p.C235R	107	chr1	248180688	T	C	AS_SB_TABLE=0,0|40,67;DP=119;ECNT=1;MBQ=0,36;MFRL=0,227;MMQ=60,40;MPOS=19;PON;POPAF=0.210;TLOD=396.28	GT:AD:AF:DP:F1R2:F2R1:SB	0/1	0	107	0.991	107
Pre-Subject 1	chr1	248273204	248273204	A	G	OR2T33	Missense_Mutation	NM_001004695	exon1	c.T611C	p.M204T	SNP	exonic	OR2T33	.	nonsynonymous SNV	OR2T33:NM_001004695:exon1:c.T611C:p.M204T	35	chr1	248273204	A	G	AS_SB_TABLE=7,5|15,8;DP=35;ECNT=1;MBQ=36,36;MFRL=249,228;MMQ=40,40;MPOS=19;POPAF=3.76;TLOD=72.63	GT:AD:AF:DP:F1R2:F2R1:SB	0/1	12	23	0.649	35
Pre-Subject 1	chr1	248593265	248593265	G	C	OR2T10	Missense_Mutation	NM_001004693	exon1	c.C504G	p.F168L	SNP	exonic	OR2T10	.	nonsynonymous SNV	OR2T10:NM_001004693:exon1:c.C504G:p.F168L	49	chr1	248593265	G	C	AS_SB_TABLE=14,22|8,5;DP=54;ECNT=1;MBQ=36,36;MFRL=219,180;MMQ=60,60;MPOS=13;POPAF=7.30;TLOD=32.72	GT:AD:AF:DP:F1R2:F2R1:SB	0/1	36	13	0.255	49
Pre-Subject 1	chr1	248638644	248638650	CAGCACG	-	OR2T35	Nonsense_Mutation	NM_001001827	exon1	c.609_615del	p.C203*	DEL	exonic	OR2T35	.	stopgain	OR2T35:NM_001001827:exon1:c.609_615del:p.C203*	89	chr1	248638643	TCAGCACG	T	AS_SB_TABLE=0,0|43,46;DP=111;ECNT=1;MBQ=0,36;MFRL=0,178;MMQ=60,24;MPOS=23;PON;POPAF=0.137;TLOD=385.00	GT:AD:AF:DP:F1R2:F2R1:SB	0/1	0	89	0.99	89
Pre-Subject 1	chr10	3113428	3113428	A	G	PFKP	Silent	NM_001323070	exon8	c.A633G	p.A211A	SNP	exonic	PFKP	.	synonymous SNV	PFKP:NM_001323070:exon8:c.A633G:p.A211A,PFKP:NM_001323074:exon8:c.A633G:p.A211A,PFKP:NM_001323073:exon9:c.A633G:p.A211A,PFKP:NM_001323067:exon13:c.A1200G:p.A400A,PFKP:NM_001323068:exon13:c.A1281G:p.A427A,PFKP:NM_001323069:exon13:c.A774G:p.A258A,PFKP:NM_001345944:exon13:c.A1167G:p.A389A,PFKP:NM_002627:exon13:c.A1281G:p.A427A,PFKP:NM_001323071:exon14:c.A1167G:p.A389A,PFKP:NM_001323072:exon14:c.A116…	68	chr10	3113428	A	G	AS_SB_TABLE=11,28|12,17;DP=72;ECNT=2;MBQ=36,36;MFRL=219,173;MMQ=60,60;MPOS=19;PON;POPAF=0.218;TLOD=84.66	GT:AD:AF:DP:F1R2:F2R1:SB	0/1	39	29	0.405	68
Pre-Subject 1	chr10	3113439	3113439	C	G	PFKP	Nonsense_Mutation	NM_001323070	exon8	c.C644G	p.S215X	SNP	exonic	PFKP	.	stopgain	PFKP:NM_001323070:exon8:c.C644G:p.S215X,PFKP:NM_001323074:exon8:c.C644G:p.S215X,PFKP:NM_001323073:exon9:c.C644G:p.S215X,PFKP:NM_001323067:exon13:c.C1211G:p.S404X,PFKP:NM_001323068:exon13:c.C1292G:p.S431X,PFKP:NM_001323069:exon13:c.C785G:p.S262X,PFKP:NM_001345944:exon13:c.C1178G:p.S393X,PFKP:NM_002627:exon13:c.C1292G:p.S431X,PFKP:NM_001323071:exon14:c.C1178G:p.S393X,PFKP:NM_001323072:exon14:c.C117…	64	chr10	3113439	C	G	AS_SB_TABLE=16,46|2,0;DP=67;ECNT=2;MBQ=36,36;MFRL=199,179;MMQ=60,60;MPOS=24;POPAF=7.30;TLOD=3.52	GT:AD:AF:DP:F1R2:F2R1:SB	0/1	62	2	0.048	64
Pre-Subject 1	chr10	3166365	3166365	A	G	PITRM1	Silent	NM_001242309	exon3	c.T186C	p.T62T	SNP	exonic	PITRM1	.	synonymous SNV	PITRM1:NM_001242309:exon3:c.T186C:p.T62T,PITRM1:NM_001242307:exon4:c.T282C:p.T94T,PITRM1:NM_001347725:exon4:c.T282C:p.T94T,PITRM1:NM_001347729:exon4:c.T258C:p.T86T,PITRM1:NM_001347730:exon4:c.T258C:p.T86T,PITRM1:NM_014889:exon4:c.T282C:p.T94T	19	chr10	3166365	A	G	AS_SB_TABLE=0,0|4,15;DP=21;ECNT=3;MBQ=0,36;MFRL=0,214;MMQ=60,60;MPOS=23;PON;POPAF=0.167;TLOD=74.51	GT:AD:AF:DP:F1R2:F2R1:SB	0/1	0	19	0.956	19
Pre-Subject 1	chr10	5749161	5749161	C	G	TASOR2	Missense_Mutation	NM_001321785	exon15	c.C5497G	p.Q1833E	SNP	exonic	TASOR2	.	nonsynonymous SNV	TASOR2:NM_001321785:exon15:c.C5497G:p.Q1833E,TASOR2:NM_017782:exon15:c.C5740G:p.Q1914E,TASOR2:NM_001321783:exon16:c.C5740G:p.Q1914E,TASOR2:NM_001321784:exon16:c.C5740G:p.Q1914E	42	chr10	5749161	C	G	AS_SB_TABLE=24,14|0,4;DP=46;ECNT=2;MBQ=36,23;MFRL=201,174;MMQ=60,59;MPOS=30;POPAF=7.30;TLOD=11.25	GT:AD:AF:DP:F1R2:F2R1:SB	0/1	38	4	0.11	42
Pre-Subject 1	chr10	5749175	5749175	C	A	TASOR2	Silent	NM_001321785	exon15	c.C5511A	p.L1837L	SNP	exonic	TASOR2	.	synonymous SNV	TASOR2:NM_001321785:exon15:c.C5511A:p.L1837L,TASOR2:NM_017782:exon15:c.C5754A:p.L1918L,TASOR2:NM_001321783:exon16:c.C5754A:p.L1918L,TASOR2:NM_001321784:exon16:c.C5754A:p.L1918L	42	chr10	5749175	C	A	AS_SB_TABLE=26,11|0,5;DP=46;ECNT=2;MBQ=36,36;MFRL=187,166;MMQ=60,60;MPOS=14;POPAF=1.46;TLOD=9.65	GT:AD:AF:DP:F1R2:F2R1:SB	0/1	37	5	0.132	42
Pre-Subject 1	chr10	5909240	5909240	C	T	FBH1	Silent	NM_001258452	exon5	c.C744T	p.P248P	SNP	exonic	FBH1	.	synonymous SNV	FBH1:NM_001258452:exon5:c.C744T:p.P248P,FBH1:NM_178150:exon5:c.C966T:p.P322P,FBH1:NM_001258453:exon6:c.C744T:p.P248P,FBH1:NM_032807:exon6:c.C1119T:p.P373P	32	chr10	5909240	C	T	AS_SB_TABLE=2,18|0,12;DP=33;ECNT=1;MBQ=36,36;MFRL=191,234;MMQ=60,60;MPOS=12;POPAF=2.71;TLOD=38.89	GT:AD:AF:DP:F1R2:F2R1:SB	0/1	20	12	0.396	32
Pre-Subject 1	chr10	7563105	7563105	C	T	ITIH5	Missense_Mutation	NM_032817	exon10	c.G2165A	p.R722Q	SNP	exonic	ITIH5	.	nonsynonymous SNV	ITIH5:NM_032817:exon10:c.G2165A:p.R722Q,ITIH5:NM_030569:exon14:c.G2807A:p.R936Q	39	chr10	7563105	C	T	AS_SB_TABLE=0,0|29,10;DP=41;ECNT=1;MBQ=0,36;MFRL=0,203;MMQ=60,60;MPOS=15;PON;POPAF=0.167;TLOD=146.19	GT:AD:AF:DP:F1R2:F2R1:SB	0/1	0	39	0.975	39
Pre-Subject 1	chr10	13109224	13109224	G	A	OPTN	Silent	NM_021980	exon2	c.G102A	p.T34T	SNP	exonic	OPTN	.	synonymous SNV	OPTN:NM_021980:exon2:c.G102A:p.T34T,OPTN:NM_001008212:exon3:c.G102A:p.T34T,OPTN:NM_001008211:exon4:c.G102A:p.T34T,OPTN:NM_001008213:exon4:c.G102A:p.T34T	30	chr10	13109224	G	A	AS_SB_TABLE=5,13|0,12;DP=30;ECNT=1;MBQ=36,36;MFRL=172,170;MMQ=60,60;MPOS=20;PON;POPAF=0.699;TLOD=39.15	GT:AD:AF:DP:F1R2:F2R1:SB	0/1	18	12	0.411	30
Pre-Subject 1	chr10	13657290	13657290	T	G	FRMD4A	Missense_Mutation	NM_001318338	exon11	c.A1372C	p.N458H	SNP	exonic	FRMD4A	.	nonsynonymous SNV	FRMD4A:NM_001318338:exon11:c.A1372C:p.N458H,FRMD4A:NM_001318336:exon21:c.A2347C:p.N783H,FRMD4A:NM_001318337:exon21:c.A2398C:p.N800H,FRMD4A:NM_018027:exon22:c.A2299C:p.N767H	50	chr10	13657290	T	G	AS_SB_TABLE=42,6|2,0;DP=51;ECNT=1;MBQ=36,36;MFRL=171,242;MMQ=60,60;MPOS=12;POPAF=7.30;TLOD=3.39	GT:AD:AF:DP:F1R2:F2R1:SB	0/1	48	2	0.059	50
Pre-Subject 1	chr10	16937777	16937777	T	C	CUBN	Missense_Mutation	NM_001081	exon39	c.A5741G	p.D1914G	SNP	exonic	CUBN	.	nonsynonymous SNV	CUBN:NM_001081:exon39:c.A5741G:p.D1914G	30	chr10	16937777	T	C	AS_SB_TABLE=0,28|0,2;DP=31;ECNT=1;MBQ=36,36;MFRL=218,271;MMQ=60,60;MPOS=19;POPAF=7.30;TLOD=4.03	GT:AD:AF:DP:F1R2:F2R1:SB	0/1	28	2	0.094	30
Pre-Subject 1	chr10	21516537	21516537	-	CCTCCT	SKIDA1	In_Frame_Ins	NM_207371	exon4	c.1285_1286insAGGAGG	p.E428_G429insEE	INS	exonic	SKIDA1	.	nonframeshift insertion	SKIDA1:NM_207371:exon4:c.1285_1286insAGGAGG:p.E428_G429insEE	11	chr10	21516537	C	CCCTCCT	AS_SB_TABLE=0,0|4,7;DP=12;ECNT=1;MBQ=0,36;MFRL=0,221;MMQ=60,60;MPOS=23;PON;POPAF=0.198;RPA=4,6;RU=CCT;STR;TLOD=45.89	GT:AD:AF:DP:F1R2:F2R1:SB	0/1	0	11	0.928	11
Pre-Subject 1	chr10	22209539	22209539	C	T	EBLN1	Missense_Mutation	NM_001199938	exon1	c.G445A	p.G149R	SNP	exonic	EBLN1	.	nonsynonymous SNV	EBLN1:NM_001199938:exon1:c.G445A:p.G149R	65	chr10	22209539	C	T	AS_SB_TABLE=16,19|12,18;DP=67;ECNT=2;MBQ=32,36;MFRL=215,226;MMQ=60,60;MPOS=13;PON;POPAF=0.627;TLOD=128.80	GT:AD:AF:DP:F1R2:F2R1:PGT:PID:PS:SB	0|1	35	30	0.494	65
Pre-Subject 1	chr10	22209555	22209555	-	AGA	EBLN1	In_Frame_Ins	NM_001199938	exon1	c.428_429insTCT	p.L143_I144insL	INS	exonic	EBLN1	.	nonframeshift insertion	EBLN1:NM_001199938:exon1:c.428_429insTCT:p.L143_I144insL	71	chr10	22209555	C	CAGA	AS_SB_TABLE=13,20|13,25;DP=74;ECNT=2;MBQ=36,36;MFRL=209,226;MMQ=60,60;MPOS=15;PON;POPAF=0.500;RPA=1,2;RU=AGA;STR;TLOD=156.32	GT:AD:AF:DP:F1R2:F2R1:PGT:PID:PS:SB	0|1	33	38	0.546	71
Pre-Subject 1	chr10	23193706	23193706	T	C	PTF1A	Missense_Mutation	NM_178161	exon2	c.T787C	p.S263P	SNP	exonic	PTF1A	.	nonsynonymous SNV	PTF1A:NM_178161:exon2:c.T787C:p.S263P	17	chr10	23193706	T	C	AS_SB_TABLE=9,2|3,3;DP=18;ECNT=1;MBQ=36,36;MFRL=212,221;MMQ=60,60;MPOS=30;PON;POPAF=0.294;TLOD=19.84	GT:AD:AF:DP:F1R2:F2R1:SB	0/1	11	6	0.367	17
Pre-Subject 1	chr10	24600849	24600849	T	G	ARHGAP21	Silent	NM_001367455	exon7	c.A2290C	p.R764R	SNP	exonic	ARHGAP21	.	synonymous SNV	ARHGAP21:NM_001367455:exon7:c.A2290C:p.R764R,ARHGAP21:NM_001367452:exon11:c.A2458C:p.R820R,ARHGAP21:NM_001367447:exon13:c.A2899C:p.R967R,ARHGAP21:NM_001367451:exon13:c.A2899C:p.R967R,ARHGAP21:NM_001367453:exon13:c.A2899C:p.R967R,ARHGAP21:NM_001367448:exon14:c.A2929C:p.R977R,ARHGAP21:NM_001367454:exon14:c.A2929C:p.R977R,ARHGAP21:NM_020824:exon14:c.A2929C:p.R977R,ARHGAP21:NM_001367449:exon15:c.A263…	54	chr10	24600849	T	G	AS_SB_TABLE=23,26|5,0;DP=58;ECNT=4;MBQ=32,14;MFRL=203,187;MMQ=40,40;MPOS=26;POPAF=7.30;TLOD=4.54	GT:AD:AF:DP:F1R2:F2R1:SB	0/1	49	5	0.102	54
Pre-Subject 1	chr10	24600859	24600859	G	T	ARHGAP21	Nonsense_Mutation	NM_001367455	exon7	c.C2280A	p.Y760X	SNP	exonic	ARHGAP21	.	stopgain	ARHGAP21:NM_001367455:exon7:c.C2280A:p.Y760X,ARHGAP21:NM_001367452:exon11:c.C2448A:p.Y816X,ARHGAP21:NM_001367447:exon13:c.C2889A:p.Y963X,ARHGAP21:NM_001367451:exon13:c.C2889A:p.Y963X,ARHGAP21:NM_001367453:exon13:c.C2889A:p.Y963X,ARHGAP21:NM_001367448:exon14:c.C2919A:p.Y973X,ARHGAP21:NM_001367454:exon14:c.C2919A:p.Y973X,ARHGAP21:NM_020824:exon14:c.C2919A:p.Y973X,ARHGAP21:NM_001367449:exon15:c.C262…	57	chr10	24600859	G	T	AS_SB_TABLE=23,29|5,0;DP=60;ECNT=4;MBQ=36,14;MFRL=205,177;MMQ=43,40;MPOS=6;POPAF=7.30;TLOD=3.75	GT:AD:AF:DP:F1R2:F2R1:SB	0/1	52	5	0.074	57
Pre-Subject 1	chr10	24600861	24600861	A	T	ARHGAP21	Missense_Mutation	NM_001367455	exon7	c.T2278A	p.Y760N	SNP	exonic	ARHGAP21	.	nonsynonymous SNV	ARHGAP21:NM_001367455:exon7:c.T2278A:p.Y760N,ARHGAP21:NM_001367452:exon11:c.T2446A:p.Y816N,ARHGAP21:NM_001367447:exon13:c.T2887A:p.Y963N,ARHGAP21:NM_001367451:exon13:c.T2887A:p.Y963N,ARHGAP21:NM_001367453:exon13:c.T2887A:p.Y963N,ARHGAP21:NM_001367448:exon14:c.T2917A:p.Y973N,ARHGAP21:NM_001367454:exon14:c.T2917A:p.Y973N,ARHGAP21:NM_020824:exon14:c.T2917A:p.Y973N,ARHGAP21:NM_001367449:exon15:c.T262…	60	chr10	24600861	A	T	AS_SB_TABLE=25,31|4,0;DP=60;ECNT=4;MBQ=36,14;MFRL=205,165;MMQ=45,40;MPOS=14;POPAF=7.30;TLOD=4.82	GT:AD:AF:DP:F1R2:F2R1:SB	0/1	56	4	0.073	60
Pre-Subject 1	chr10	25025222	25025222	C	A	THNSL1	Missense_Mutation	NM_024838	exon3	c.C1999A	p.H667N	SNP	exonic	THNSL1	.	nonsynonymous SNV	THNSL1:NM_024838:exon3:c.C1999A:p.H667N	43	chr10	25025222	C	A	AS_SB_TABLE=18,23|1,1;DP=43;ECNT=1;MBQ=36,36;MFRL=228,281;MMQ=60,60;MPOS=13;POPAF=7.30;TLOD=3.98	GT:AD:AF:DP:F1R2:F2R1:SB	0/1	41	2	0.067	43
Pre-Subject 1	chr10	25175958	25175958	A	C	GPR158	Missense_Mutation	NM_020752	exon1	c.A538C	p.T180P	SNP	exonic	GPR158	.	nonsynonymous SNV	GPR158:NM_020752:exon1:c.A538C:p.T180P	65	chr10	25175958	A	C	AS_SB_TABLE=9,53|1,2;DP=71;ECNT=1;MBQ=36,32;MFRL=211,211;MMQ=60,60;MPOS=25;POPAF=7.30;TLOD=3.90	GT:AD:AF:DP:F1R2:F2R1:SB	0/1	62	3	0.06	65
Pre-Subject 1	chr10	27033377	27033377	C	T	ANKRD26	Missense_Mutation	NM_001256053	exon25	c.G3652A	p.V1218I	SNP	exonic	ANKRD26	.	nonsynonymous SNV	ANKRD26:NM_001256053:exon25:c.G3652A:p.V1218I,ANKRD26:NM_014915:exon25:c.G3655A:p.V1219I	59	chr10	27033377	C	T	AS_SB_TABLE=2,22|1,34;DP=60;ECNT=1;MBQ=36,36;MFRL=174,179;MMQ=60,60;MPOS=22;POPAF=2.11;TLOD=121.23	GT:AD:AF:DP:F1R2:F2R1:SB	0/1	24	35	0.596	59
Pre-Subject 1	chr10	27173203	27173203	G	A	MASTL	Missense_Mutation	NM_001172303	exon9	c.G2210A	p.R737Q	SNP	exonic	MASTL	.	nonsynonymous SNV	MASTL:NM_001172303:exon9:c.G2210A:p.R737Q,MASTL:NM_001172304:exon9:c.G2207A:p.R736Q,MASTL:NM_001320756:exon9:c.G2207A:p.R736Q,MASTL:NM_001320757:exon9:c.G2210A:p.R737Q,MASTL:NM_032844:exon9:c.G2207A:p.R736Q	35	chr10	27173203	G	A	AS_SB_TABLE=21,12|1,1;DP=42;ECNT=1;MBQ=36,34;MFRL=185,198;MMQ=60,60;MPOS=22;POPAF=7.30;TLOD=3.39	GT:AD:AF:DP:F1R2:F2R1:SB	0/1	33	2	0.08	35
Pre-Subject 1	chr10	32928170	32928170	G	A	ITGB1	Silent	NM_033668	exon4	c.C471T	p.D157D	SNP	exonic	ITGB1	.	synonymous SNV	ITGB1:NM_033668:exon4:c.C471T:p.D157D,ITGB1:NM_002211:exon5:c.C471T:p.D157D,ITGB1:NM_133376:exon5:c.C471T:p.D157D	92	chr10	32928170	G	A	AS_SB_TABLE=31,15|27,19;DP=100;ECNT=1;MBQ=36,36;MFRL=199,198;MMQ=60,60;MPOS=15;POPAF=2.01;TLOD=148.17	GT:AD:AF:DP:F1R2:F2R1:SB	0/1	46	46	0.501	92
Pre-Subject 1	chr10	33207601	33207601	C	A	NRP1	Missense_Mutation	NM_001024628	exon10	c.G1730T	p.R577I	SNP	exonic	NRP1	.	nonsynonymous SNV	NRP1:NM_001024628:exon10:c.G1730T:p.R577I,NRP1:NM_001024629:exon10:c.G1730T:p.R577I,NRP1:NM_001244972:exon10:c.G1730T:p.R577I,NRP1:NM_001244973:exon10:c.G1730T:p.R577I,NRP1:NM_001330068:exon10:c.G1730T:p.R577I,NRP1:NM_003873:exon10:c.G1730T:p.R577I	31	chr10	33207601	C	A	AS_SB_TABLE=17,12|2,0;DP=33;ECNT=1;MBQ=36,34;MFRL=187,230;MMQ=60,60;MPOS=25;POPAF=7.30;TLOD=4.47	GT:AD:AF:DP:F1R2:F2R1:SB	0/1	29	2	0.096	31
Pre-Subject 1	chr10	33213434	33213434	G	A	NRP1	Silent	NM_001024628	exon9	c.C1566T	p.N522N	SNP	exonic	NRP1	.	synonymous SNV	NRP1:NM_001024628:exon9:c.C1566T:p.N522N,NRP1:NM_001024629:exon9:c.C1566T:p.N522N,NRP1:NM_001244972:exon9:c.C1566T:p.N522N,NRP1:NM_001244973:exon9:c.C1566T:p.N522N,NRP1:NM_001330068:exon9:c.C1566T:p.N522N,NRP1:NM_003873:exon9:c.C1566T:p.N522N	101	chr10	33213434	G	A	AS_SB_TABLE=27,23|34,17;DP=108;ECNT=1;MBQ=36,36;MFRL=214,194;MMQ=60,60;MPOS=18;POPAF=2.63;TLOD=168.57	GT:AD:AF:DP:F1R2:F2R1:SB	0/1	50	51	0.505	101
Pre-Subject 1	chr10	35639815	35639815	G	T	FZD8	Missense_Mutation	NM_031866	exon1	c.C1615A	p.L539I	SNP	exonic	FZD8	.	nonsynonymous SNV	FZD8:NM_031866:exon1:c.C1615A:p.L539I	53	chr10	35639815	G	T	AS_SB_TABLE=22,22|9,0;DP=54;ECNT=4;MBQ=36,14;MFRL=179,162;MMQ=60,60;MPOS=20;POPAF=3.71;TLOD=8.72	GT:AD:AF:DP:F1R2:F2R1:SB	0/1	44	9	0.146	53
Pre-Subject 1	chr10	35639827	35639828	GG	-	FZD8	Frame_Shift_Del	NM_031866	exon1	c.1602_1603del	p.L535Vfs*185	DEL	exonic	FZD8	.	frameshift deletion	FZD8:NM_031866:exon1:c.1602_1603del:p.L535Vfs*185	56	chr10	35639826	AGG	A	AS_SB_TABLE=24,29|3,0;DP=59;ECNT=4;MBQ=36,36;MFRL=184,162;MMQ=60,60;MPOS=31;POPAF=7.30;TLOD=7.22	GT:AD:AF:DP:F1R2:F2R1:SB	0/1	53	3	0.066	56
Pre-Subject 1	chr10	35639833	35639837	GGCGG	-	FZD8	Frame_Shift_Del	NM_031866	exon1	c.1593_1597del	p.R532Gfs*187	DEL	exonic	FZD8	.	frameshift deletion	FZD8:NM_031866:exon1:c.1593_1597del:p.R532Gfs*187	61	chr10	35639832	AGGCGG	A	AS_SB_TABLE=26,32|3,0;DP=62;ECNT=4;MBQ=36,32;MFRL=185,162;MMQ=60,60;MPOS=33;POPAF=7.30;TLOD=7.56	GT:AD:AF:DP:F1R2:F2R1:SB	0/1	58	3	0.064	61
Pre-Subject 1	chr10	35639840	35639840	C	A	FZD8	Missense_Mutation	NM_031866	exon1	c.G1590T	p.M530I	SNP	exonic	FZD8	.	nonsynonymous SNV	FZD8:NM_031866:exon1:c.G1590T:p.M530I	57	chr10	35639840	C	A	AS_SB_TABLE=22,32|3,0;DP=60;ECNT=4;MBQ=36,14;MFRL=186,133;MMQ=60,60;MPOS=30;POPAF=7.30;TLOD=3.36	GT:AD:AF:DP:F1R2:F2R1:SB	0/1	54	3	0.086	57
Pre-Subject 1	chr10	37832123	37832123	G	T	ZNF248	Missense_Mutation	NM_001352472	exon4	c.C1232A	p.T411N	SNP	exonic	ZNF248	.	nonsynonymous SNV	ZNF248:NM_001352472:exon4:c.C1232A:p.T411N,ZNF248:NM_001352483:exon4:c.C800A:p.T267N,ZNF248:NM_001352491:exon4:c.C800A:p.T267N,ZNF248:NM_001352469:exon5:c.C1232A:p.T411N,ZNF248:NM_001352471:exon5:c.C1232A:p.T411N,ZNF248:NM_001352474:exon5:c.C1232A:p.T411N,ZNF248:NM_001267597:exon6:c.C1232A:p.T411N,ZNF248:NM_001352470:exon6:c.C1232A:p.T411N,ZNF248:NM_001352473:exon6:c.C1232A:p.T411N,ZNF248:NM_0013…	84	chr10	37832123	G	T	AS_SB_TABLE=46,30|1,7;DP=104;ECNT=1;MBQ=36,32;MFRL=197,287;MMQ=60,60;MPOS=14;POPAF=7.30;TLOD=14.45	GT:AD:AF:DP:F1R2:F2R1:SB	0/1	76	8	0.101	84
Pre-Subject 1	chr10	37952702	37952702	C	A	ZNF25	Missense_Mutation	NM_001329650	exon6	c.G796T	p.A266S	SNP	exonic	ZNF25	.	nonsynonymous SNV	ZNF25:NM_001329650:exon6:c.G796T:p.A266S,ZNF25:NM_001329652:exon6:c.G796T:p.A266S,ZNF25:NM_001329654:exon6:c.G796T:p.A266S,ZNF25:NM_001329655:exon6:c.G793T:p.A265S,ZNF25:NM_145011:exon6:c.G796T:p.A266S,ZNF25:NM_001329647:exon7:c.G808T:p.A270S,ZNF25:NM_001329649:exon7:c.G808T:p.A270S,ZNF25:NM_001329651:exon7:c.G796T:p.A266S,ZNF25:NM_001329653:exon7:c.G796T:p.A266S,ZNF25:NM_001329657:exon7:c.G688T:…	81	chr10	37952702	C	A	AS_SB_TABLE=39,37|1,4;DP=88;ECNT=1;MBQ=36,21;MFRL=209,252;MMQ=60,60;MPOS=4;POPAF=7.30;TLOD=3.00	GT:AD:AF:DP:F1R2:F2R1:SB	0/1	76	5	0.064	81
Pre-Subject 1	chr10	42593671	42593671	C	A	ZNF33B	Missense_Mutation	NM_001305033	exon4	c.G1300T	p.D434Y	SNP	exonic	ZNF33B	.	nonsynonymous SNV	ZNF33B:NM_001305033:exon4:c.G1300T:p.D434Y,ZNF33B:NM_001305036:exon5:c.G943T:p.D315Y,ZNF33B:NM_001305037:exon5:c.G943T:p.D315Y,ZNF33B:NM_001305038:exon5:c.G943T:p.D315Y,ZNF33B:NM_006955:exon5:c.G1279T:p.D427Y,ZNF33B:NM_001305035:exon6:c.G943T:p.D315Y,ZNF33B:NM_001305039:exon6:c.G943T:p.D315Y,ZNF33B:NM_001305040:exon7:c.G943T:p.D315Y	62	chr10	42593671	C	A	AS_SB_TABLE=38,22|2,0;DP=64;ECNT=2;MBQ=36,25;MFRL=183,229;MMQ=60,52;MPOS=32;POPAF=7.30;TLOD=3.97	GT:AD:AF:DP:F1R2:F2R1:PGT:PID:PS:SB	0|1	60	2	0.048	62
Pre-Subject 1	chr10	42593675	42593675	T	A	ZNF33B	Missense_Mutation	NM_001305033	exon4	c.A1296T	p.K432N	SNP	exonic	ZNF33B	.	nonsynonymous SNV	ZNF33B:NM_001305033:exon4:c.A1296T:p.K432N,ZNF33B:NM_001305036:exon5:c.A939T:p.K313N,ZNF33B:NM_001305037:exon5:c.A939T:p.K313N,ZNF33B:NM_001305038:exon5:c.A939T:p.K313N,ZNF33B:NM_006955:exon5:c.A1275T:p.K425N,ZNF33B:NM_001305035:exon6:c.A939T:p.K313N,ZNF33B:NM_001305039:exon6:c.A939T:p.K313N,ZNF33B:NM_001305040:exon7:c.A939T:p.K313N	66	chr10	42593675	T	A	AS_SB_TABLE=41,23|2,0;DP=66;ECNT=2;MBQ=36,14;MFRL=183,229;MMQ=60,52;MPOS=36;POPAF=7.30;TLOD=3.89	GT:AD:AF:DP:F1R2:F2R1:PGT:PID:PS:SB	0|1	64	2	0.046	66
Pre-Subject 1	chr10	43077302	43077304	TGC	-	RET	In_Frame_Del	NM_020630	exon1	c.44_46del	p.L19del	DEL	exonic	RET	.	nonframeshift deletion	RET:NM_020630:exon1:c.44_46del:p.L19del,RET:NM_020975:exon1:c.44_46del:p.L19del	20	chr10	43077301	TTGC	T	AS_SB_TABLE=4,14|0,2;DP=31;ECNT=1;MBQ=36,36;MFRL=144,140;MMQ=60,60;MPOS=31;POPAF=3.91;RPA=5,4;RU=TGC;STR;TLOD=5.35	GT:AD:AF:DP:F1R2:F2R1:SB	0/1	18	2	0.133	20
Pre-Subject 1	chr10	43126685	43126685	A	C	RET	Silent	NM_001355216	exon16	c.A2388C	p.R796R	SNP	exonic	RET	.	synonymous SNV	RET:NM_001355216:exon16:c.A2388C:p.R796R,RET:NM_020630:exon19:c.A3150C:p.R1050R,RET:NM_020975:exon19:c.A3150C:p.R1050R	78	chr10	43126685	A	C	AS_SB_TABLE=51,15|12,0;DP=84;ECNT=1;MBQ=21,14;MFRL=236,243;MMQ=60,60;MPOS=24;POPAF=7.30;TLOD=3.92	GT:AD:AF:DP:F1R2:F2R1:SB	0/1	66	12	0.107	78
Pre-Subject 1	chr10	44977437	44977437	G	C	DEPP1	Silent	NM_007021	exon2	c.C594G	p.V198V	SNP	exonic	DEPP1	.	synonymous SNV	DEPP1:NM_007021:exon2:c.C594G:p.V198V	42	chr10	44977437	G	C	AS_SB_TABLE=34,6|0,2;DP=43;ECNT=3;MBQ=36,14;MFRL=178,233;MMQ=60,60;MPOS=28;POPAF=7.30;TLOD=4.32	GT:AD:AF:DP:F1R2:F2R1:SB	0/1	40	2	0.063	42
Pre-Subject 1	chr10	44977450	44977450	C	G	DEPP1	Missense_Mutation	NM_007021	exon2	c.G581C	p.R194P	SNP	exonic	DEPP1	.	nonsynonymous SNV	DEPP1:NM_007021:exon2:c.G581C:p.R194P	46	chr10	44977450	C	G	AS_SB_TABLE=34,3|0,9;DP=49;ECNT=3;MBQ=36,14;MFRL=177,171;MMQ=60,60;MPOS=4;POPAF=7.30;TLOD=9.28	GT:AD:AF:DP:F1R2:F2R1:SB	0/1	37	9	0.162	46
Pre-Subject 1	chr10	44977459	44977459	T	G	DEPP1	Missense_Mutation	NM_007021	exon2	c.A572C	p.H191P	SNP	exonic	DEPP1	.	nonsynonymous SNV	DEPP1:NM_007021:exon2:c.A572C:p.H191P	45	chr10	44977459	T	G	AS_SB_TABLE=32,1|0,12;DP=45;ECNT=3;MBQ=36,14;MFRL=177,189;MMQ=60,60;MPOS=13;POPAF=7.30;TLOD=18.70	GT:AD:AF:DP:F1R2:F2R1:SB	0/1	33	12	0.238	45
Pre-Subject 1	chr10	46330066	46330066	C	G	ANTXRL	Silent	NM_001278688	exon17	c.C1878G	p.P626P	SNP	exonic	ANTXRL	.	synonymous SNV	ANTXRL:NM_001278688:exon17:c.C1878G:p.P626P,ANTXRL:NM_001354208:exon19:c.C984G:p.P328P	30	chr10	46330066	C	G	AS_SB_TABLE=1,11|2,16;DP=33;ECNT=1;MBQ=36,36;MFRL=248,206;MMQ=60,60;MPOS=16;PON;POPAF=7.30;TLOD=56.05	GT:AD:AF:DP:F1R2:F2R1:SB	0/1	12	18	0.592	30
Pre-Subject 1	chr10	46549695	46549695	C	A	GPRIN2	Missense_Mutation	NM_014696	exon3	c.G1042T	p.V348L	SNP	exonic	GPRIN2	.	nonsynonymous SNV	GPRIN2:NM_014696:exon3:c.G1042T:p.V348L	92	chr10	46549695	C	A	AS_SB_TABLE=14,37|9,32;DP=97;ECNT=2;MBQ=36,36;MFRL=207,234;MMQ=60,60;MPOS=21;PON;POPAF=0.465;TLOD=126.02	GT:AD:AF:DP:F1R2:F2R1:SB	0/1	51	41	0.446	92
Pre-Subject 1	chr10	46549708	46549708	C	T	GPRIN2	Silent	NM_014696	exon3	c.G1029A	p.A343A	SNP	exonic	GPRIN2	.	synonymous SNV	GPRIN2:NM_014696:exon3:c.G1029A:p.A343A	88	chr10	46549708	C	T	AS_SB_TABLE=19,48|5,16;DP=92;ECNT=2;MBQ=36,36;MFRL=221,249;MMQ=60,60;MPOS=31;POPAF=2.81;TLOD=59.99	GT:AD:AF:DP:F1R2:F2R1:SB	0/1	67	21	0.244	88
Pre-Subject 1	chr10	46549870	46549870	A	G	GPRIN2	Silent	NM_014696	exon3	c.T867C	p.H289H	SNP	exonic	GPRIN2	.	synonymous SNV	GPRIN2:NM_014696:exon3:c.T867C:p.H289H	64	chr10	46549870	A	G	AS_SB_TABLE=19,8|26,11;DP=69;ECNT=3;MBQ=36,36;MFRL=233,191;MMQ=60,60;MPOS=20;PON;POPAF=0.299;TLOD=121.42	GT:AD:AF:DP:F1R2:F2R1:SB	0/1	27	37	0.574	64
Pre-Subject 1	chr10	46549885	46549885	C	T	GPRIN2	Silent	NM_014696	exon3	c.G852A	p.G284G	SNP	exonic	GPRIN2	.	synonymous SNV	GPRIN2:NM_014696:exon3:c.G852A:p.G284G	74	chr10	46549885	C	T	AS_SB_TABLE=26,18|21,9;DP=77;ECNT=3;MBQ=36,36;MFRL=193,226;MMQ=60,60;MPOS=20;PON;POPAF=0.325;TLOD=99.45	GT:AD:AF:DP:F1R2:F2R1:SB	0/1	44	30	0.415	74
Pre-Subject 1	chr10	46549894	46549894	C	A	GPRIN2	Missense_Mutation	NM_014696	exon3	c.G843T	p.R281S	SNP	exonic	GPRIN2	.	nonsynonymous SNV	GPRIN2:NM_014696:exon3:c.G843T:p.R281S	85	chr10	46549894	C	A	AS_SB_TABLE=43,26|7,9;DP=88;ECNT=3;MBQ=36,36;MFRL=205,229;MMQ=60,60;MPOS=20;POPAF=3.08;TLOD=40.61	GT:AD:AF:DP:F1R2:F2R1:SB	0/1	69	16	0.19	85
Pre-Subject 1	chr10	46550009	46550009	-	CCCCCACCT	GPRIN2	In_Frame_Ins	NM_014696	exon3	c.727_728insAGGTGGGGG	p.R242_A243insEVG	INS	exonic	GPRIN2	.	nonframeshift insertion	GPRIN2:NM_014696:exon3:c.727_728insAGGTGGGGG:p.R242_A243insEVG	86	chr10	46550009	G	GCCCCCACCT	AS_SB_TABLE=14,24|26,22;DP=110;ECNT=5;MBQ=36,36;MFRL=192,205;MMQ=60,60;MPOS=24;PON;POPAF=7.30;TLOD=154.81	GT:AD:AF:DP:F1R2:F2R1:PGT:PID:PS:SB	0|1	38	48	0.538	86
Pre-Subject 1	chr10	46550013	46550013	T	C	GPRIN2	Missense_Mutation	NM_014696	exon3	c.A724G	p.R242G	SNP	exonic	GPRIN2	.	nonsynonymous SNV	GPRIN2:NM_014696:exon3:c.A724G:p.R242G	93	chr10	46550013	T	C	AS_SB_TABLE=27,28|14,24;DP=111;ECNT=5;MBQ=36,36;MFRL=205,192;MMQ=60,60;MPOS=16;PON;POPAF=0.072;TLOD=146.07	GT:AD:AF:DP:F1R2:F2R1:SB	0/1	55	38	0.423	93
Pre-Subject 1	chr10	46550016	46550016	C	T	GPRIN2	Missense_Mutation	NM_014696	exon3	c.G721A	p.V241M	SNP	exonic	GPRIN2	.	nonsynonymous SNV	GPRIN2:NM_014696:exon3:c.G721A:p.V241M	94	chr10	46550016	C	T	AS_SB_TABLE=15,24|27,28;DP=110;ECNT=5;MBQ=36,36;MFRL=192,205;MMQ=60,60;MPOS=19;PON;POPAF=7.30;TLOD=177.25	GT:AD:AF:DP:F1R2:F2R1:PGT:PID:PS:SB	0|1	39	55	0.568	94
Pre-Subject 1	chr10	46550021	46550021	C	T	GPRIN2	Missense_Mutation	NM_014696	exon3	c.G716A	p.R239K	SNP	exonic	GPRIN2	.	nonsynonymous SNV	GPRIN2:NM_014696:exon3:c.G716A:p.R239K	105	chr10	46550021	C	T	AS_SB_TABLE=31,32|16,26;DP=112;ECNT=5;MBQ=36,36;MFRL=197,192;MMQ=60,60;MPOS=17;PON;POPAF=0.325;TLOD=118.61	GT:AD:AF:DP:F1R2:F2R1:SB	0/1	63	42	0.399	105
Pre-Subject 1	chr10	46550040	46550040	C	A	GPRIN2	Missense_Mutation	NM_014696	exon3	c.G697T	p.A233S	SNP	exonic	GPRIN2	.	nonsynonymous SNV	GPRIN2:NM_014696:exon3:c.G697T:p.A233S	101	chr10	46550040	C	A	AS_SB_TABLE=25,35|13,28;DP=105;ECNT=5;MBQ=36,36;MFRL=207,217;MMQ=60,60;MPOS=21;PON;POPAF=0.324;TLOD=120.99	GT:AD:AF:DP:F1R2:F2R1:SB	0/1	60	41	0.398	101
Pre-Subject 1	chr10	46550419	46550419	C	A	GPRIN2	Silent	NM_014696	exon3	c.G318T	p.L106L	SNP	exonic	GPRIN2	.	synonymous SNV	GPRIN2:NM_014696:exon3:c.G318T:p.L106L	105	chr10	46550419	C	A	AS_SB_TABLE=12,30|29,34;DP=109;ECNT=4;MBQ=36,36;MFRL=197,205;MMQ=60,60;MPOS=17;PON;POPAF=0.299;TLOD=237.38	GT:AD:AF:DP:F1R2:F2R1:SB	0/1	42	63	0.596	105
Pre-Subject 1	chr10	46550439	46550439	T	G	GPRIN2	Missense_Mutation	NM_014696	exon3	c.A298C	p.T100P	SNP	exonic	GPRIN2	.	nonsynonymous SNV	GPRIN2:NM_014696:exon3:c.A298C:p.T100P	90	chr10	46550439	T	G	AS_SB_TABLE=29,27|16,18;DP=101;ECNT=4;MBQ=36,36;MFRL=205,197;MMQ=60,60;MPOS=15;PON;POPAF=0.325;TLOD=103.65	GT:AD:AF:DP:F1R2:F2R1:SB	0/1	56	34	0.384	90
Pre-Subject 1	chr10	46550466	46550466	A	G	GPRIN2	Missense_Mutation	NM_014696	exon3	c.T271C	p.W91R	SNP	exonic	GPRIN2	.	nonsynonymous SNV	GPRIN2:NM_014696:exon3:c.T271C:p.W91R	95	chr10	46550466	A	G	AS_SB_TABLE=16,20|39,20;DP=100;ECNT=4;MBQ=36,36;MFRL=205,204;MMQ=60,60;MPOS=22;PON;POPAF=0.299;TLOD=202.66	GT:AD:AF:DP:F1R2:F2R1:SB	0/1	36	59	0.624	95
Pre-Subject 1	chr10	47348774	47348774	A	C	RBP3	Missense_Mutation	NM_002900	exon1	c.A290C	p.E97A	SNP	exonic	RBP3	.	nonsynonymous SNV	RBP3:NM_002900:exon1:c.A290C:p.E97A	72	chr10	47348774	A	C	AS_SB_TABLE=27,32|13,0;DP=78;ECNT=1;MBQ=36,14;MFRL=215,184;MMQ=60,60;MPOS=18;POPAF=7.30;TLOD=4.54	GT:AD:AF:DP:F1R2:F2R1:SB	0/1	59	13	0.125	72
Pre-Subject 1	chr10	47353477	47353477	G	A	RBP3	Silent	NM_002900	exon2	c.G3207A	p.K1069K	SNP	exonic	RBP3	.	synonymous SNV	RBP3:NM_002900:exon2:c.G3207A:p.K1069K	22	chr10	47353477	G	A	AS_SB_TABLE=0,20|0,2;DP=24;ECNT=1;MBQ=36,36;MFRL=228,187;MMQ=60,60;MPOS=30;POPAF=7.30;TLOD=4.41	GT:AD:AF:DP:F1R2:F2R1:SB	0/1	20	2	0.124	22
Pre-Subject 1	chr10	48238119	48238119	G	A	FRMPD2	Missense_Mutation	NM_001318191	exon6	c.C721T	p.L241F	SNP	exonic	FRMPD2	.	nonsynonymous SNV	FRMPD2:NM_001318191:exon6:c.C721T:p.L241F,FRMPD2:NM_001018071:exon8:c.C793T:p.L265F	32	chr10	48238119	G	A	AS_SB_TABLE=1,25|1,5;DP=32;ECNT=1;MBQ=36,36;MFRL=241,281;MMQ=60,60;MPOS=17;POPAF=7.30;TLOD=16.99	GT:AD:AF:DP:F1R2:F2R1:SB	0/1	26	6	0.206	32
Pre-Subject 1	chr10	48731559	48731559	T	G	WDFY4	Missense_Mutation	NM_001370153	exon9	c.T1579G	p.S527A	SNP	exonic	WDFY4	.	nonsynonymous SNV	WDFY4:NM_001370153:exon9:c.T1579G:p.S527A,WDFY4:NM_001370154:exon9:c.T1579G:p.S527A,WDFY4:NM_020945:exon9:c.T1579G:p.S527A	40	chr10	48731559	T	G	AS_SB_TABLE=0,36|0,4;DP=42;ECNT=2;MBQ=36,14;MFRL=246,236;MMQ=60,60;MPOS=26;POPAF=7.30;TLOD=4.94	GT:AD:AF:DP:F1R2:F2R1:SB	0/1	36	4	0.105	40
Pre-Subject 1	chr10	49323472	49323472	G	T	C10orf71	Silent	NM_001135196	exon3	c.G927T	p.T309T	SNP	exonic	C10orf71	.	synonymous SNV	C10orf71:NM_001135196:exon3:c.G927T:p.T309T	41	chr10	49323472	G	T	AS_SB_TABLE=10,29|0,2;DP=43;ECNT=2;MBQ=36,36;MFRL=203,327;MMQ=60,60;MPOS=25;POPAF=7.30;TLOD=3.61	GT:AD:AF:DP:F1R2:F2R1:SB	0/1	39	2	0.069	41
Pre-Subject 1	chr10	49323504	49323504	G	T	C10orf71	Missense_Mutation	NM_001135196	exon3	c.G959T	p.R320L	SNP	exonic	C10orf71	.	nonsynonymous SNV	C10orf71:NM_001135196:exon3:c.G959T:p.R320L	36	chr10	49323504	G	T	AS_SB_TABLE=4,12|9,11;DP=39;ECNT=2;MBQ=36,36;MFRL=205,201;MMQ=60,60;MPOS=18;PON;POPAF=0.767;TLOD=68.45	GT:AD:AF:DP:F1R2:F2R1:SB	0/1	16	20	0.568	36
Pre-Subject 1	chr10	50008915	50008916	AA	-	AGAP6	Frame_Shift_Del	NM_001077665	exon8	c.790_791del	p.K264Rfs*10	DEL	exonic	AGAP6	.	frameshift deletion	AGAP6:NM_001077665:exon8:c.790_791del:p.K264Rfs*10,AGAP6:NM_001365867:exon9:c.187_188del:p.K63Rfs*10	88	chr10	50008914	CAA	C	AS_SB_TABLE=39,12|32,5;DP=93;ECNT=1;MBQ=36,36;MFRL=216,214;MMQ=22,21;MPOS=17;PON;POPAF=0.697;RPA=3,1;RU=A;STR;TLOD=133.03	GT:AD:AF:DP:F1R2:F2R1:SB	0/1	51	37	0.422	88
Pre-Subject 1	chr10	50009164	50009164	C	G	AGAP6	Missense_Mutation	NM_001077665	exon8	c.C1039G	p.L347V	SNP	exonic	AGAP6	.	nonsynonymous SNV	AGAP6:NM_001077665:exon8:c.C1039G:p.L347V,AGAP6:NM_001365867:exon9:c.C436G:p.L146V	149	chr10	50009164	C	G	AS_SB_TABLE=49,75|18,7;DP=158;ECNT=1;MBQ=36,36;MFRL=202,144;MMQ=24,23;MPOS=19;POPAF=2.24;TLOD=40.60	GT:AD:AF:DP:F1R2:F2R1:SB	0/1	124	25	0.154	149
Pre-Subject 1	chr10	60072319	60072319	T	C	ANK3	Silent	NM_020987	exon37	c.A8562G	p.T2854T	SNP	exonic	ANK3	.	synonymous SNV	ANK3:NM_020987:exon37:c.A8562G:p.T2854T	69	chr10	60072319	T	C	AS_SB_TABLE=18,18|15,18;DP=71;ECNT=1;MBQ=36,36;MFRL=210,185;MMQ=60,60;MPOS=28;POPAF=4.13;TLOD=107.71	GT:AD:AF:DP:F1R2:F2R1:SB	0/1	36	33	0.481	69
Pre-Subject 1	chr10	61662996	61662996	-	GGGCCGACCCCGGCA	CABCOCO1	In_Frame_Ins	NM_001366906	exon1	c.24_25insGGGCCGACCCCGGCA	p.G14_T15insPTPAG	INS	exonic	CABCOCO1	.	nonframeshift insertion	CABCOCO1:NM_001366906:exon1:c.24_25insGGGCCGACCCCGGCA:p.G14_T15insPTPAG,CABCOCO1:NM_001366907:exon1:c.24_25insGGGCCGACCCCGGCA:p.G14_T15insPTPAG	47	chr10	61662996	G	GGGGCCGACCCCGGCA	AS_SB_TABLE=0,0|34,13;DP=52;ECNT=1;MBQ=0,36;MFRL=0,153;MMQ=60,60;MPOS=17;PON;POPAF=3.488e-03;TLOD=122.25	GT:AD:AF:DP:F1R2:F2R1:SB	0/1	0	47	0.979	47
Pre-Subject 1	chr10	62268569	62268569	C	T	RTKN2	Silent	NM_001282941	exon1	c.G42A	p.A14A	SNP	exonic	RTKN2	.	synonymous SNV	RTKN2:NM_001282941:exon1:c.G42A:p.A14A,RTKN2:NM_145307:exon1:c.G42A:p.A14A	30	chr10	62268569	C	T	AS_SB_TABLE=8,9|4,9;DP=35;ECNT=1;MBQ=36,36;MFRL=161,157;MMQ=60,60;MPOS=16;POPAF=3.23;TLOD=39.89	GT:AD:AF:DP:F1R2:F2R1:SB	0/1	17	13	0.436	30
Pre-Subject 1	chr10	63214947	63214947	G	A	JMJD1C	Missense_Mutation	NM_001322254	exon6	c.C563T	p.S188L	SNP	exonic	JMJD1C	.	nonsynonymous SNV	JMJD1C:NM_001322254:exon6:c.C563T:p.S188L,JMJD1C:NM_001282948:exon7:c.C674T:p.S225L,JMJD1C:NM_001318153:exon7:c.C356T:p.S119L,JMJD1C:NM_001322252:exon7:c.C1106T:p.S369L,JMJD1C:NM_001322258:exon7:c.C563T:p.S188L,JMJD1C:NM_001318154:exon8:c.C674T:p.S225L,JMJD1C:NM_032776:exon8:c.C1220T:p.S407L	47	chr10	63214947	G	A	AS_SB_TABLE=14,30|0,3;DP=47;ECNT=1;MBQ=36,36;MFRL=191,130;MMQ=60,60;MPOS=13;POPAF=7.30;TLOD=6.34	GT:AD:AF:DP:F1R2:F2R1:SB	0/1	44	3	0.082	47
Pre-Subject 1	chr10	68166630	68166630	T	G	MYPN	Missense_Mutation	NM_032578	exon10	c.T1937G	p.V646G	SNP	exonic	MYPN	.	nonsynonymous SNV	MYPN:NM_032578:exon10:c.T1937G:p.V646G,MYPN:NM_001256267:exon11:c.T1937G:p.V646G,MYPN:NM_001256268:exon14:c.T1055G:p.V352G	42	chr10	68166630	T	G	AS_SB_TABLE=7,29|6,0;DP=46;ECNT=1;MBQ=36,14;MFRL=201,171;MMQ=60,60;MPOS=9;POPAF=7.30;TLOD=4.19	GT:AD:AF:DP:F1R2:F2R1:SB	0/1	36	6	0.107	42
Pre-Subject 1	chr10	68470099	68470099	A	G	DNA2	Missense_Mutation	NM_001080449	exon2	c.T139C	p.Y47H	SNP	exonic	DNA2	.	nonsynonymous SNV	DNA2:NM_001080449:exon2:c.T139C:p.Y47H	71	chr10	68470099	A	G	AS_SB_TABLE=13,16|18,24;DP=77;ECNT=1;MBQ=36,36;MFRL=195,189;MMQ=60,60;MPOS=20;POPAF=4.61;TLOD=135.41	GT:AD:AF:DP:F1R2:F2R1:SB	0/1	29	42	0.565	71
Pre-Subject 1	chr10	68788169	68788169	A	G	CCAR1	Missense_Mutation	NM_001282959	exon22	c.A2983G	p.T995A	SNP	exonic	CCAR1	.	nonsynonymous SNV	CCAR1:NM_001282959:exon22:c.A2983G:p.T995A,CCAR1:NM_001282960:exon22:c.A2983G:p.T995A,CCAR1:NM_018237:exon23:c.A3028G:p.T1010A	27	chr10	68788169	A	G	AS_SB_TABLE=24,1|2,0;DP=27;ECNT=1;MBQ=36,36;MFRL=173,200;MMQ=60,60;MPOS=29;POPAF=7.30;TLOD=4.21	GT:AD:AF:DP:F1R2:F2R1:SB	0/1	25	2	0.107	27
Pre-Subject 1	chr10	70301470	70301470	G	A	LRRC20	Missense_Mutation	NM_001278213	exon4	c.C289T	p.R97C	SNP	exonic	LRRC20	.	nonsynonymous SNV	LRRC20:NM_001278213:exon4:c.C289T:p.R97C,LRRC20:NM_001278214:exon4:c.C232T:p.R78C,LRRC20:NM_018205:exon4:c.C271T:p.R91C,LRRC20:NM_018239:exon4:c.C289T:p.R97C,LRRC20:NM_001278211:exon5:c.C439T:p.R147C,LRRC20:NM_001278212:exon5:c.C439T:p.R147C,LRRC20:NM_207119:exon5:c.C439T:p.R147C	49	chr10	70301470	G	A	AS_SB_TABLE=15,32|0,2;DP=55;ECNT=1;MBQ=36,36;MFRL=188,178;MMQ=60,60;MPOS=29;POPAF=7.30;TLOD=3.81	GT:AD:AF:DP:F1R2:F2R1:SB	0/1	47	2	0.059	49
Pre-Subject 1	chr10	70598662	70598662	C	G	PRF1	Missense_Mutation	NM_001083116	exon3	c.G1059C	p.Q353H	SNP	exonic	PRF1	.	nonsynonymous SNV	PRF1:NM_001083116:exon3:c.G1059C:p.Q353H,PRF1:NM_005041:exon3:c.G1059C:p.Q353H	61	chr10	70598662	C	G	AS_SB_TABLE=36,20|3,2;DP=67;ECNT=1;MBQ=36,36;MFRL=205,235;MMQ=60,60;MPOS=17;POPAF=7.30;TLOD=11.45	GT:AD:AF:DP:F1R2:F2R1:SB	0/1	56	5	0.096	61
Pre-Subject 1	chr10	71362022	71362022	T	C	SLC29A3	Missense_Mutation	NM_001363518	exon6	c.T608C	p.L203P	SNP	exonic	SLC29A3	.	nonsynonymous SNV	SLC29A3:NM_001363518:exon6:c.T608C:p.L203P,SLC29A3:NM_018344:exon6:c.T842C:p.L281P	32	chr10	71362022	T	C	AS_SB_TABLE=10,4|11,7;DP=34;ECNT=2;MBQ=36,36;MFRL=171,201;MMQ=60,60;MPOS=15;PON;POPAF=1.80;TLOD=65.98	GT:AD:AF:DP:F1R2:F2R1:SB	0/1	14	18	0.568	32
Pre-Subject 1	chr10	71362065	71362065	A	C	SLC29A3	Silent	NM_001363518	exon6	c.A651C	p.T217T	SNP	exonic	SLC29A3	.	synonymous SNV	SLC29A3:NM_001363518:exon6:c.A651C:p.T217T,SLC29A3:NM_018344:exon6:c.A885C:p.T295T	49	chr10	71362065	A	C	AS_SB_TABLE=26,14|8,1;DP=50;ECNT=2;MBQ=32,14;MFRL=200,206;MMQ=60,60;MPOS=20;POPAF=7.30;TLOD=6.84	GT:AD:AF:DP:F1R2:F2R1:SB	0/1	40	9	0.154	49
Pre-Subject 1	chr10	71687692	71687692	G	A	CDH23	Missense_Mutation	NM_001171930	exon18	c.G2032A	p.V678I	SNP	exonic	CDH23	.	nonsynonymous SNV	CDH23:NM_001171930:exon18:c.G2032A:p.V678I,CDH23:NM_001171931:exon18:c.G2032A:p.V678I,CDH23:NM_022124:exon18:c.G2032A:p.V678I	52	chr10	71687692	G	A	AS_SB_TABLE=3,12|8,29;DP=53;ECNT=1;MBQ=36,36;MFRL=209,196;MMQ=60,60;MPOS=26;POPAF=4.61;TLOD=124.25	GT:AD:AF:DP:F1R2:F2R1:SB	0/1	15	37	0.71	52
Pre-Subject 1	chr10	74975692	74975692	G	A	KAT6B	Missense_Mutation	NM_001256468	exon8	c.G1355A	p.R452Q	SNP	exonic	KAT6B	.	nonsynonymous SNV	KAT6B:NM_001256468:exon8:c.G1355A:p.R452Q,KAT6B:NM_001370136:exon8:c.G1355A:p.R452Q,KAT6B:NM_001370137:exon8:c.G1355A:p.R452Q,KAT6B:NM_001370138:exon8:c.G1355A:p.R452Q,KAT6B:NM_012330:exon8:c.G1355A:p.R452Q	124	chr10	74975692	G	A	AS_SB_TABLE=56,50|10,8;DP=130;ECNT=1;MBQ=36,36;MFRL=199,190;MMQ=60,60;MPOS=11;POPAF=7.30;TLOD=45.93	GT:AD:AF:DP:F1R2:F2R1:SB	0/1	106	18	0.154	124
Pre-Subject 1	chr10	74985094	74985094	G	A	KAT6B	Missense_Mutation	NM_001370143	exon9	c.G1323A	p.M441I	SNP	exonic	KAT6B	.	nonsynonymous SNV	KAT6B:NM_001370143:exon9:c.G1323A:p.M441I,KAT6B:NM_001370144:exon10:c.G1323A:p.M441I,KAT6B:NM_001370141:exon11:c.G1512A:p.M504I,KAT6B:NM_001370142:exon11:c.G1512A:p.M504I,KAT6B:NM_001256468:exon12:c.G1839A:p.M613I,KAT6B:NM_001256469:exon12:c.G1512A:p.M504I,KAT6B:NM_001370136:exon12:c.G2388A:p.M796I,KAT6B:NM_001370137:exon12:c.G2388A:p.M796I,KAT6B:NM_001370138:exon12:c.G1839A:p.M613I,KAT6B:NM_0013…	82	chr10	74985094	G	A	AS_SB_TABLE=35,11|26,10;DP=86;ECNT=1;MBQ=36,36;MFRL=179,193;MMQ=60,60;MPOS=21;POPAF=7.30;TLOD=114.56	GT:AD:AF:DP:F1R2:F2R1:SB	0/1	46	36	0.438	82
Pre-Subject 1	chr10	75399197	75399197	T	G	ZNF503	Missense_Mutation	NM_032772	exon2	c.A1493C	p.H498P	SNP	exonic	ZNF503	.	nonsynonymous SNV	ZNF503:NM_032772:exon2:c.A1493C:p.H498P	146	chr10	75399197	T	G	AS_SB_TABLE=54,63|0,29;DP=159;ECNT=1;MBQ=32,14;MFRL=190,172;MMQ=60,60;MPOS=21;POPAF=7.30;TLOD=11.43	GT:AD:AF:DP:F1R2:F2R1:SB	0/1	117	29	0.144	146
Pre-Subject 1	chr10	75401229	75401229	T	G	ZNF503	Missense_Mutation	NM_032772	exon1	c.A191C	p.D64A	SNP	exonic	ZNF503	.	nonsynonymous SNV	ZNF503:NM_032772:exon1:c.A191C:p.D64A	98	chr10	75401229	T	G	AS_SB_TABLE=47,31|1,19;DP=104;ECNT=1;MBQ=36,14;MFRL=187,171;MMQ=60,60;MPOS=29;POPAF=7.30;TLOD=5.16	GT:AD:AF:DP:F1R2:F2R1:SB	0/1	78	20	0.121	98
Pre-Subject 1	chr10	79291118	79291118	A	C	ZMIZ1	Missense_Mutation	NM_020338	exon10	c.A700C	p.I234L	SNP	exonic	ZMIZ1	.	nonsynonymous SNV	ZMIZ1:NM_020338:exon10:c.A700C:p.I234L	87	chr10	79291118	A	C	AS_SB_TABLE=2,23|10,52;DP=95;ECNT=1;MBQ=36,36;MFRL=189,205;MMQ=60,60;MPOS=18;POPAF=3.76;TLOD=206.91	GT:AD:AF:DP:F1R2:F2R1:SB	0/1	25	62	0.707	87
Pre-Subject 1	chr10	79296516	79296516	A	C	ZMIZ1	Missense_Mutation	NM_020338	exon13	c.A1276C	p.T426P	SNP	exonic	ZMIZ1	.	nonsynonymous SNV	ZMIZ1:NM_020338:exon13:c.A1276C:p.T426P	57	chr10	79296516	A	C	AS_SB_TABLE=6,41|10,0;DP=63;ECNT=2;MBQ=36,18;MFRL=181,193;MMQ=60,60;MPOS=15;POPAF=7.30;TLOD=8.39	GT:AD:AF:DP:F1R2:F2R1:SB	0/1	47	10	0.182	57
Pre-Subject 1	chr10	79296524	79296524	A	C	ZMIZ1	Silent	NM_020338	exon13	c.A1284C	p.P428P	SNP	exonic	ZMIZ1	.	synonymous SNV	ZMIZ1:NM_020338:exon13:c.A1284C:p.P428P	51	chr10	79296524	A	C	AS_SB_TABLE=4,36|11,0;DP=54;ECNT=2;MBQ=36,14;MFRL=184,203;MMQ=60,60;MPOS=4;POPAF=7.30;TLOD=4.68	GT:AD:AF:DP:F1R2:F2R1:SB	0/1	40	11	0.156	51
Pre-Subject 1	chr10	84199089	84199089	A	C	CDHR1	Missense_Mutation	NM_001171971	exon5	c.A406C	p.I136L	SNP	exonic	CDHR1	.	nonsynonymous SNV	CDHR1:NM_001171971:exon5:c.A406C:p.I136L,CDHR1:NM_033100:exon5:c.A406C:p.I136L	36	chr10	84199089	A	C	AS_SB_TABLE=0,19|1,16;DP=38;ECNT=1;MBQ=36,36;MFRL=200,194;MMQ=60,60;MPOS=19;POPAF=7.30;TLOD=54.28	GT:AD:AF:DP:F1R2:F2R1:SB	0/1	19	17	0.471	36
Pre-Subject 1	chr10	84214475	84214475	C	T	CDHR1	Missense_Mutation	NM_033100	exon17	c.C2434T	p.P812S	SNP	exonic	CDHR1	.	nonsynonymous SNV	CDHR1:NM_033100:exon17:c.C2434T:p.P812S	123	chr10	84214475	C	T	AS_SB_TABLE=24,56|13,30;DP=125;ECNT=1;MBQ=36,36;MFRL=202,167;MMQ=60,60;MPOS=19;POPAF=1.41;TLOD=109.28	GT:AD:AF:DP:F1R2:F2R1:SB	0/1	80	43	0.328	123
Pre-Subject 1	chr10	86658649	86658649	A	G	OPN4	Missense_Mutation	NM_033282	exon4	c.A590G	p.Y197C	SNP	exonic	OPN4	.	nonsynonymous SNV	OPN4:NM_033282:exon4:c.A590G:p.Y197C,OPN4:NM_001030015:exon5:c.A623G:p.Y208C	81	chr10	86658649	A	G	AS_SB_TABLE=4,67|0,10;DP=88;ECNT=1;MBQ=36,36;MFRL=203,198;MMQ=60,60;MPOS=17;POPAF=7.30;TLOD=26.13	GT:AD:AF:DP:F1R2:F2R1:SB	0/1	71	10	0.132	81
Pre-Subject 1	chr10	87008627	87008627	G	T	AGAP11	Missense_Mutation	NM_133447	exon12	c.G375T	p.Q125H	SNP	exonic	AGAP11	.	nonsynonymous SNV	AGAP11:NM_133447:exon12:c.G375T:p.Q125H	196	chr10	87008627	G	T	AS_SB_TABLE=109,75|7,5;DP=212;ECNT=1;MBQ=36,36;MFRL=199,156;MMQ=44,42;MPOS=17;POPAF=7.30;TLOD=20.32	GT:AD:AF:DP:F1R2:F2R1:SB	0/1	184	12	0.056	196
Pre-Subject 1	chr10	87960902	87960902	G	T	PTEN	Missense_Mutation	NM_000314	exon8	c.G810T	p.M270I	SNP	exonic	PTEN	.	nonsynonymous SNV	PTEN:NM_000314:exon8:c.G810T:p.M270I,PTEN:NM_001304718:exon8:c.G219T:p.M73I,PTEN:NM_001304717:exon9:c.G1329T:p.M443I	18	chr10	87960902	G	T	AS_SB_TABLE=14,0|4,0;DP=22;ECNT=1;MBQ=36,14;MFRL=246,164;MMQ=40,60;MPOS=19;POPAF=2.67;TLOD=3.85	GT:AD:AF:DP:F1R2:F2R1:SB	0/1	14	4	0.219	18
Pre-Subject 1	chr10	89306703	89306703	T	A	IFIT2	Silent	NM_001547	exon2	c.T747A	p.V249V	SNP	exonic	IFIT2	.	synonymous SNV	IFIT2:NM_001547:exon2:c.T747A:p.V249V	50	chr10	89306703	T	A	AS_SB_TABLE=9,17|7,17;DP=54;ECNT=1;MBQ=36,36;MFRL=190,246;MMQ=60,60;MPOS=21;PON;POPAF=0.238;TLOD=80.40	GT:AD:AF:DP:F1R2:F2R1:SB	0/1	26	24	0.481	50
Pre-Subject 1	chr10	89383999	89383999	A	T	IFIT1B	Missense_Mutation	NM_001010987	exon2	c.A686T	p.D229V	SNP	exonic	IFIT1B	.	nonsynonymous SNV	IFIT1B:NM_001010987:exon2:c.A686T:p.D229V	34	chr10	89383999	A	T	AS_SB_TABLE=12,20|1,1;DP=36;ECNT=1;MBQ=36,36;MFRL=257,241;MMQ=60,56;MPOS=27;POPAF=7.30;TLOD=3.86	GT:AD:AF:DP:F1R2:F2R1:SB	0/1	32	2	0.083	34
Pre-Subject 1	chr10	89710033	89710033	T	G	KIF20B	Missense_Mutation	NM_001284259	exon5	c.T458G	p.L153R	SNP	exonic	KIF20B	.	nonsynonymous SNV	KIF20B:NM_001284259:exon5:c.T458G:p.L153R,KIF20B:NM_016195:exon5:c.T458G:p.L153R	20	chr10	89710033	T	G	AS_SB_TABLE=4,11|5,0;DP=21;ECNT=2;MBQ=36,14;MFRL=193,174;MMQ=60,60;MPOS=18;POPAF=7.30;TLOD=6.27	GT:AD:AF:DP:F1R2:F2R1:SB	0/1	15	5	0.217	20
Pre-Subject 1	chr10	89710051	89710051	C	A	KIF20B	Missense_Mutation	NM_001284259	exon5	c.C476A	p.T159K	SNP	exonic	KIF20B	.	nonsynonymous SNV	KIF20B:NM_001284259:exon5:c.C476A:p.T159K,KIF20B:NM_016195:exon5:c.C476A:p.T159K	20	chr10	89710051	C	A	AS_SB_TABLE=2,14|4,0;DP=20;ECNT=2;MBQ=36,14;MFRL=193,204;MMQ=60,60;MPOS=11;POPAF=7.30;TLOD=5.33	GT:AD:AF:DP:F1R2:F2R1:SB	0/1	16	4	0.236	20
Pre-Subject 1	chr10	89738145	89738145	-	TAAAAG	KIF20B	In_Frame_Ins	NM_001284259	exon20	c.3304_3305insTAAAAG	p.K1103_E1104insVK	INS	exonic	KIF20B	.	nonframeshift insertion	KIF20B:NM_001284259:exon20:c.3304_3305insTAAAAG:p.K1103_E1104insVK,KIF20B:NM_016195:exon20:c.3184_3185insTAAAAG:p.K1063_E1064insVK	50	chr10	89738145	C	CTAAAAG	AS_SB_TABLE=12,13|6,19;DP=57;ECNT=1;MBQ=36,36;MFRL=237,207;MMQ=60,60;MPOS=24;PON;POPAF=0.527;TLOD=95.07	GT:AD:AF:DP:F1R2:F2R1:SB	0/1	25	25	0.496	50
Pre-Subject 1	chr10	91501231	91501231	C	T	HECTD2	Nonsense_Mutation	NM_001348365	exon20	c.C1786T	p.Q596X	SNP	exonic	HECTD2	.	stopgain	HECTD2:NM_001348365:exon20:c.C1786T:p.Q596X,HECTD2:NM_182765:exon20:c.C2107T:p.Q703X,HECTD2:NM_001284274:exon21:c.C2119T:p.Q707X	83	chr10	91501231	C	T	AS_SB_TABLE=43,24|10,6;DP=88;ECNT=1;MBQ=36,36;MFRL=172,176;MMQ=60,60;MPOS=22;POPAF=7.30;TLOD=42.71	GT:AD:AF:DP:F1R2:F2R1:SB	0/1	67	16	0.2	83
Pre-Subject 1	chr10	95064901	95064901	C	T	CYP2C8	Missense_Mutation	NM_001198854	exon3	c.G235A	p.V79I	SNP	exonic	CYP2C8	.	nonsynonymous SNV	CYP2C8:NM_001198854:exon3:c.G235A:p.V79I,CYP2C8:NM_000770:exon4:c.G541A:p.V181I,CYP2C8:NM_001198853:exon4:c.G331A:p.V111I,CYP2C8:NM_001198855:exon5:c.G331A:p.V111I	24	chr10	95064901	C	T	AS_SB_TABLE=1,11|1,11;DP=27;ECNT=1;MBQ=36,36;MFRL=182,224;MMQ=60,58;MPOS=11;POPAF=2.25;TLOD=38.05	GT:AD:AF:DP:F1R2:F2R1:SB	0/1	12	12	0.5	24
Pre-Subject 1	chr10	97430432	97430432	C	A	PGAM1	Silent	NM_001317079	exon2	c.C148A	p.R50R	SNP	exonic	PGAM1	.	synonymous SNV	PGAM1:NM_001317079:exon2:c.C148A:p.R50R,PGAM1:NM_002629:exon2:c.C193A:p.R65R	23	chr10	97430432	C	A	AS_SB_TABLE=8,13|0,2;DP=26;ECNT=1;MBQ=36,32;MFRL=232,262;MMQ=40,50;MPOS=12;POPAF=7.30;TLOD=3.46	GT:AD:AF:DP:F1R2:F2R1:SB	0/1	21	2	0.118	23
Pre-Subject 1	chr10	97641173	97641173	A	C	PI4K2A	Missense_Mutation	NM_018425	exon1	c.A431C	p.Q144P	SNP	exonic	PI4K2A	.	nonsynonymous SNV	PI4K2A:NM_018425:exon1:c.A431C:p.Q144P	37	chr10	97641173	A	C	AS_SB_TABLE=21,11|0,5;DP=38;ECNT=3;MBQ=36,14;MFRL=225,154;MMQ=60,60;MPOS=25;POPAF=7.30;TLOD=6.33	GT:AD:AF:DP:F1R2:F2R1:SB	0/1	32	5	0.131	37
Pre-Subject 1	chr10	100194510	100194510	T	A	CHUK	Missense_Mutation	NM_001278	exon17	c.A1741T	p.S581C	SNP	exonic	CHUK	.	nonsynonymous SNV	CHUK:NM_001278:exon17:c.A1741T:p.S581C,CHUK:NM_001320928:exon17:c.A1741T:p.S581C	30	chr10	100194510	T	A	AS_SB_TABLE=8,20|0,2;DP=30;ECNT=1;MBQ=36,36;MFRL=179,234;MMQ=60,60;MPOS=8;POPAF=7.30;TLOD=4.07	GT:AD:AF:DP:F1R2:F2R1:SB	0/1	28	2	0.097	30
Pre-Subject 1	chr10	100508016	100508016	G	A	SEC31B	Silent	NM_015490	exon6	c.C531T	p.N177N	SNP	exonic	SEC31B	.	synonymous SNV	SEC31B:NM_015490:exon6:c.C531T:p.N177N	61	chr10	100508016	G	A	AS_SB_TABLE=10,49|0,2;DP=62;ECNT=1;MBQ=36,36;MFRL=199,187;MMQ=60,60;MPOS=15;POPAF=7.30;TLOD=3.14	GT:AD:AF:DP:F1R2:F2R1:SB	0/1	59	2	0.049	61
Pre-Subject 1	chr10	101010536	101010536	-	GCTGCG	PDZD7	In_Frame_Ins	NM_001195263	exon15	c.2352_2353insCGCAGC	p.S784_S785insRS	INS	exonic	PDZD7	.	nonframeshift insertion	PDZD7:NM_001195263:exon15:c.2352_2353insCGCAGC:p.S784_S785insRS	30	chr10	101010536	T	TGCTGCG	AS_SB_TABLE=3,12|6,9;DP=37;ECNT=2;MBQ=36,36;MFRL=194,189;MMQ=60,60;MPOS=32;PON;POPAF=4.31;RPA=3,4;RU=GCTGCG;STR;TLOD=49.19	GT:AD:AF:DP:F1R2:F2R1:SB	0/1	15	15	0.49	30
Pre-Subject 1	chr10	101010570	101010570	A	G	PDZD7	Silent	NM_001195263	exon15	c.T2319C	p.R773R	SNP	exonic	PDZD7	.	synonymous SNV	PDZD7:NM_001195263:exon15:c.T2319C:p.R773R	33	chr10	101010570	A	G	AS_SB_TABLE=5,10|5,13;DP=36;ECNT=2;MBQ=36,36;MFRL=207,171;MMQ=60,60;MPOS=20;PON;POPAF=0.090;TLOD=52.82	GT:AD:AF:DP:F1R2:F2R1:SB	0/1	15	18	0.54	33
Pre-Subject 1	chr10	101064835	101064835	A	G	KAZALD1	Missense_Mutation	NM_001319303	exon5	c.A416G	p.N139S	SNP	exonic	KAZALD1	.	nonsynonymous SNV	KAZALD1:NM_001319303:exon5:c.A416G:p.N139S,KAZALD1:NM_030929:exon5:c.A830G:p.N277S	28	chr10	101064835	A	G	AS_SB_TABLE=15,5|6,2;DP=29;ECNT=1;MBQ=36,36;MFRL=168,273;MMQ=60,60;MPOS=18;POPAF=2.37;TLOD=21.58	GT:AD:AF:DP:F1R2:F2R1:SB	0/1	20	8	0.275	28
Pre-Subject 1	chr10	102141319	102141319	-	GC	PPRC1	Frame_Shift_Ins	NM_001288727	exon5	c.2811_2812insGC	p.P938Afs*9	INS	exonic	PPRC1	.	frameshift insertion	PPRC1:NM_001288727:exon5:c.2811_2812insGC:p.P938Afs*9,PPRC1:NM_001288728:exon5:c.2451_2452insGC:p.P818Afs*9,PPRC1:NM_015062:exon5:c.2811_2812insGC:p.P938Afs*9	31	chr10	102141319	G	GGC	AS_SB_TABLE=6,20|5,0;DP=36;ECNT=8;MBQ=36,32;MFRL=212,223;MMQ=60,60;MPOS=18;POPAF=7.30;TLOD=9.71	GT:AD:AF:DP:F1R2:F2R1:PGT:PID:PS:SB	0|1	26	5	0.157	31
Pre-Subject 1	chr10	102141328	102141328	A	C	PPRC1	Silent	NM_001288727	exon5	c.A2820C	p.P940P	SNP	exonic	PPRC1	.	synonymous SNV	PPRC1:NM_001288727:exon5:c.A2820C:p.P940P,PPRC1:NM_001288728:exon5:c.A2460C:p.P820P,PPRC1:NM_015062:exon5:c.A2820C:p.P940P	31	chr10	102141328	A	C	AS_SB_TABLE=4,21|6,0;DP=32;ECNT=8;MBQ=32,34;MFRL=216,208;MMQ=60,60;MPOS=8;POPAF=7.30;TLOD=12.52	GT:AD:AF:DP:F1R2:F2R1:SB	0/1	25	6	0.211	31
Pre-Subject 1	chr10	102141331	102141332	AA	-	PPRC1	Frame_Shift_Del	NM_001288727	exon5	c.2823_2824del	p.T942Gfs*73	DEL	exonic	PPRC1	.	frameshift deletion	PPRC1:NM_001288727:exon5:c.2823_2824del:p.T942Gfs*73,PPRC1:NM_001288728:exon5:c.2463_2464del:p.T822Gfs*73,PPRC1:NM_015062:exon5:c.2823_2824del:p.T942Gfs*73	38	chr10	102141330	CAA	C	AS_SB_TABLE=7,27|4,0;DP=38;ECNT=8;MBQ=36,14;MFRL=199,223;MMQ=60,60;MPOS=6;POPAF=7.30;TLOD=9.37	GT:AD:AF:DP:F1R2:F2R1:PGT:PID:PS:SB	0|1	34	4	0.138	38
Pre-Subject 1	chr10	102141336	102141336	T	G	PPRC1	Missense_Mutation	NM_001288727	exon5	c.T2828G	p.V943G	SNP	exonic	PPRC1	.	nonsynonymous SNV	PPRC1:NM_001288727:exon5:c.T2828G:p.V943G,PPRC1:NM_001288728:exon5:c.T2468G:p.V823G,PPRC1:NM_015062:exon5:c.T2828G:p.V943G	39	chr10	102141336	T	G	AS_SB_TABLE=7,28|4,0;DP=39;ECNT=8;MBQ=36,21;MFRL=210,223;MMQ=60,60;MPOS=2;POPAF=7.30;TLOD=9.31	GT:AD:AF:DP:F1R2:F2R1:PGT:PID:PS:SB	0|1	35	4	0.135	39
Pre-Subject 1	chr10	102141352	102141352	T	G	PPRC1	Silent	NM_001288727	exon5	c.T2844G	p.G948G	SNP	exonic	PPRC1	.	synonymous SNV	PPRC1:NM_001288727:exon5:c.T2844G:p.G948G,PPRC1:NM_001288728:exon5:c.T2484G:p.G828G,PPRC1:NM_015062:exon5:c.T2844G:p.G948G	39	chr10	102141352	T	G	AS_SB_TABLE=9,29|1,0;DP=39;ECNT=8;MBQ=36,14;MFRL=192,205;MMQ=60,60;MPOS=5;POPAF=7.30;TLOD=7.75	GT:AD:AF:DP:F1R2:F2R1:PGT:PID:PS:SB	0|1	38	1	0.103	39
Pre-Subject 1	chr10	102141354	102141359	CTCCTG	-	PPRC1	In_Frame_Del	NM_001288727	exon5	c.2846_2851del	p.T949_G951delinsS	DEL	exonic	PPRC1	.	nonframeshift deletion	PPRC1:NM_001288727:exon5:c.2846_2851del:p.T949_G951delinsS,PPRC1:NM_001288728:exon5:c.2486_2491del:p.T829_G831delinsS,PPRC1:NM_015062:exon5:c.2846_2851del:p.T949_G951delinsS	39	chr10	102141353	ACTCCTG	A	AS_SB_TABLE=10,28|1,0;DP=39;ECNT=8;MBQ=36,14;MFRL=192,205;MMQ=60,60;MPOS=4;POPAF=7.30;TLOD=7.75	GT:AD:AF:DP:F1R2:F2R1:PGT:PID:PS:SB	0|1	38	1	0.103	39
Pre-Subject 1	chr10	102470028	102470028	C	T	MFSD13A	Silent	NM_024789	exon4	c.C204T	p.P68P	SNP	exonic	MFSD13A	.	synonymous SNV	MFSD13A:NM_024789:exon4:c.C204T:p.P68P	35	chr10	102470028	C	T	AS_SB_TABLE=0,0|29,6;DP=36;ECNT=1;MBQ=0,36;MFRL=0,197;MMQ=60,60;MPOS=19;PON;POPAF=0.313;TLOD=128.84	GT:AD:AF:DP:F1R2:F2R1:SB	0/1	0	35	0.973	35
Pre-Subject 1	chr10	102878892	102878893	CT	-	AS3MT	Nonsense_Mutation	NM_020682	exon9	c.786_787del	p.S263*	DEL	exonic	AS3MT	.	stopgain	AS3MT:NM_020682:exon9:c.786_787del:p.S263*	38	chr10	102878891	ACT	A	AS_SB_TABLE=14,22|1,1;DP=39;ECNT=1;MBQ=36,20;MFRL=190,114;MMQ=60,60;MPOS=20;POPAF=7.30;RPA=2,1;RU=CT;STR;TLOD=3.86	GT:AD:AF:DP:F1R2:F2R1:SB	0/1	36	2	0.049	38
Pre-Subject 1	chr10	103089711	103089711	G	A	NT5C2	Silent	NM_001351181	exon16	c.C1074T	p.D358D	SNP	exonic	NT5C2	.	synonymous SNV	NT5C2:NM_001351181:exon16:c.C1074T:p.D358D,NT5C2:NM_001351174:exon17:c.C1560T:p.D520D,NT5C2:NM_001351183:exon17:c.C1074T:p.D358D,NT5C2:NM_001351191:exon17:c.C1074T:p.D358D,NT5C2:NM_001134373:exon18:c.C1647T:p.D549D,NT5C2:NM_001351176:exon18:c.C1074T:p.D358D,NT5C2:NM_001351180:exon18:c.C1074T:p.D358D,NT5C2:NM_001351192:exon18:c.C1074T:p.D358D,NT5C2:NM_001351194:exon18:c.C933T:p.D311D,NT5C2:NM_0013…	29	chr10	103089711	G	A	AS_SB_TABLE=0,0|18,11;DP=30;ECNT=1;MBQ=0,36;MFRL=0,190;MMQ=60,60;MPOS=19;PON;POPAF=0.387;TLOD=107.38	GT:AD:AF:DP:F1R2:F2R1:SB	0/1	0	29	0.968	29
Pre-Subject 1	chr10	103278275	103278275	A	T	INA	Missense_Mutation	NM_032727	exon1	c.A1064T	p.Q355L	SNP	exonic	INA	.	nonsynonymous SNV	INA:NM_032727:exon1:c.A1064T:p.Q355L	15	chr10	103278275	A	T	AS_SB_TABLE=4,9|0,2;DP=15;ECNT=2;MBQ=36,14;MFRL=224,289;MMQ=60,60;MPOS=21;POPAF=7.30;TLOD=3.21	GT:AD:AF:DP:F1R2:F2R1:SB	0/1	13	2	0.173	15
Pre-Subject 1	chr10	103350983	103350983	-	GGAGGC	PCGF6	In_Frame_Ins	NM_001011663	exon1	c.83_84insGCCTCC	p.P28_V29insPP	INS	exonic	PCGF6	.	nonframeshift insertion	PCGF6:NM_001011663:exon1:c.83_84insGCCTCC:p.P28_V29insPP,PCGF6:NM_032154:exon1:c.83_84insGCCTCC:p.P28_V29insPP	30	chr10	103350983	A	AGGAGGC	AS_SB_TABLE=0,0|22,8;DP=32;ECNT=1;MBQ=0,36;MFRL=0,208;MMQ=60,60;MPOS=18;PON;POPAF=0.364;RPA=2,3;RU=GGAGGC;STR;TLOD=132.23	GT:AD:AF:DP:F1R2:F2R1:SB	0/1	0	30	0.97	30
Pre-Subject 1	chr10	110207916	110207916	G	C	MXI1	Silent	NM_130439	exon1	c.G108C	p.P36P	SNP	exonic	MXI1	.	synonymous SNV	MXI1:NM_130439:exon1:c.G108C:p.P36P	13	chr10	110207916	G	C	AS_SB_TABLE=5,3|5,0;DP=13;ECNT=3;MBQ=36,14;MFRL=187,228;MMQ=60,60;MPOS=8;POPAF=7.30;TLOD=13.61	GT:AD:AF:DP:F1R2:F2R1:PGT:PID:PS:SB	0|1	8	5	0.368	13
Pre-Subject 1	chr10	110207921	110207921	T	G	MXI1	Missense_Mutation	NM_130439	exon1	c.T113G	p.L38R	SNP	exonic	MXI1	.	nonsynonymous SNV	MXI1:NM_130439:exon1:c.T113G:p.L38R	12	chr10	110207921	T	G	AS_SB_TABLE=7,3|2,0;DP=13;ECNT=3;MBQ=32,14;MFRL=183,237;MMQ=60,60;MPOS=2;POPAF=7.30;TLOD=4.91	GT:AD:AF:DP:F1R2:F2R1:PGT:PID:PS:SB	0|1	10	2	0.229	12
Pre-Subject 1	chr10	110781136	110781136	A	C	RBM20	Missense_Mutation	NM_001134363	exon2	c.A527C	p.Q176P	SNP	exonic	RBM20	.	nonsynonymous SNV	RBM20:NM_001134363:exon2:c.A527C:p.Q176P	76	chr10	110781136	A	C	AS_SB_TABLE=30,43|3,0;DP=79;ECNT=1;MBQ=36,14;MFRL=211,215;MMQ=60,60;MPOS=18;POPAF=7.30;TLOD=4.21	GT:AD:AF:DP:F1R2:F2R1:SB	0/1	73	3	0.05	76
Pre-Subject 1	chr10	110823484	110823484	C	A	RBM20	Missense_Mutation	NM_001134363	exon12	c.C3321A	p.N1107K	SNP	exonic	RBM20	.	nonsynonymous SNV	RBM20:NM_001134363:exon12:c.C3321A:p.N1107K	30	chr10	110823484	C	A	AS_SB_TABLE=21,8|1,0;DP=30;ECNT=5;MBQ=36,36;MFRL=226,267;MMQ=60,60;MPOS=2;POPAF=7.30;TLOD=3.23	GT:AD:AF:DP:F1R2:F2R1:PGT:PID:PS:SB	0|1	29	1	0.082	30
Pre-Subject 1	chr10	110887675	110887675	G	A	PDCD4	Missense_Mutation	NM_001199492	exon6	c.G524A	p.R175K	SNP	exonic	PDCD4	.	nonsynonymous SNV	PDCD4:NM_001199492:exon6:c.G524A:p.R175K,PDCD4:NM_014456:exon6:c.G566A:p.R189K,PDCD4:NM_145341:exon7:c.G533A:p.R178K	28	chr10	110887675	G	A	AS_SB_TABLE=16,0|12,0;DP=31;ECNT=1;MBQ=36,36;MFRL=267,203;MMQ=60,60;MPOS=10;POPAF=2.38;TLOD=38.07	GT:AD:AF:DP:F1R2:F2R1:SB	0/1	16	12	0.433	28
Pre-Subject 1	chr10	110907792	110907792	A	C	BBIP1	Missense_Mutation	NM_001195304	exon3	c.T82G	p.L28V	SNP	exonic	BBIP1	.	nonsynonymous SNV	BBIP1:NM_001195304:exon3:c.T82G:p.L28V	35	chr10	110907792	A	C	AS_SB_TABLE=5,28|0,2;DP=36;ECNT=1;MBQ=36,36;MFRL=228,223;MMQ=60,60;MPOS=13;POPAF=7.30;TLOD=3.85	GT:AD:AF:DP:F1R2:F2R1:SB	0/1	33	2	0.083	35
Pre-Subject 1	chr10	113590640	113590640	T	G	NRAP	Missense_Mutation	NM_001322945	exon39	c.A4786C	p.T1596P	SNP	exonic	NRAP	.	nonsynonymous SNV	NRAP:NM_001322945:exon39:c.A4786C:p.T1596P,NRAP:NM_006175:exon39:c.A4789C:p.T1597P,NRAP:NM_001261463:exon40:c.A4894C:p.T1632P,NRAP:NM_198060:exon40:c.A4894C:p.T1632P	47	chr10	113590640	T	G	AS_SB_TABLE=34,11|0,2;DP=50;ECNT=1;MBQ=36,34;MFRL=206,208;MMQ=60,60;MPOS=21;POPAF=7.30;TLOD=3.09	GT:AD:AF:DP:F1R2:F2R1:SB	0/1	45	2	0.063	47
Pre-Subject 1	chr10	113645905	113645905	C	T	NRAP	Missense_Mutation	NM_001261463	exon11	c.G1030A	p.A344T	SNP	exonic	NRAP	.	nonsynonymous SNV	NRAP:NM_001261463:exon11:c.G1030A:p.A344T,NRAP:NM_001322945:exon11:c.G1030A:p.A344T,NRAP:NM_006175:exon11:c.G1030A:p.A344T,NRAP:NM_198060:exon11:c.G1030A:p.A344T	26	chr10	113645905	C	T	AS_SB_TABLE=0,0|17,9;DP=29;ECNT=2;MBQ=0,36;MFRL=0,159;MMQ=60,60;MPOS=13;PON;POPAF=0.246;TLOD=89.62	GT:AD:AF:DP:F1R2:F2R1:SB	0/1	0	26	0.964	26
Pre-Subject 1	chr10	113650475	113650475	T	C	NRAP	Missense_Mutation	NM_001261463	exon8	c.A746G	p.Y249C	SNP	exonic	NRAP	.	nonsynonymous SNV	NRAP:NM_001261463:exon8:c.A746G:p.Y249C,NRAP:NM_001322945:exon8:c.A746G:p.Y249C,NRAP:NM_006175:exon8:c.A746G:p.Y249C,NRAP:NM_198060:exon8:c.A746G:p.Y249C	39	chr10	113650475	T	C	AS_SB_TABLE=16,1|20,2;DP=40;ECNT=1;MBQ=36,36;MFRL=230,230;MMQ=60,60;MPOS=18;PON;POPAF=0.609;TLOD=72.66	GT:AD:AF:DP:F1R2:F2R1:SB	0/1	17	22	0.58	39
Pre-Subject 1	chr10	114326023	114326023	-	CCC	AFAP1L2	In_Frame_Ins	NM_001287824	exon5	c.332_333insGGG	p.G111_Q112insG	INS	exonic	AFAP1L2	.	nonframeshift insertion	AFAP1L2:NM_001287824:exon5:c.332_333insGGG:p.G111_Q112insG	35	chr10	114326023	G	GCCC	AS_SB_TABLE=10,10|9,6;DP=37;ECNT=2;MBQ=36,36;MFRL=183,179;MMQ=60,60;MPOS=26;POPAF=0.780;RPA=3,6;RU=C;STR;TLOD=43.98	GT:AD:AF:DP:F1R2:F2R1:SB	0/1	20	15	0.439	35
Pre-Subject 1	chr10	114326025	114326025	-	CCG	AFAP1L2	In_Frame_Ins	NM_001287824	exon5	c.330_331insCGG	p.L110_G111insR	INS	exonic	AFAP1L2	.	nonframeshift insertion	AFAP1L2:NM_001287824:exon5:c.330_331insCGG:p.L110_G111insR	36	chr10	114326025	C	CCCG	AS_SB_TABLE=9,6|11,10;DP=38;ECNT=2;MBQ=36,36;MFRL=179,189;MMQ=60,60;MPOS=20;POPAF=0.205;TLOD=69.38	GT:AD:AF:DP:F1R2:F2R1:SB	0/1	15	21	0.569	36
Pre-Subject 1	chr10	116065616	116065616	A	C	GFRA1	Missense_Mutation	NM_001348099	exon6	c.T845G	p.L282R	SNP	exonic	GFRA1	.	nonsynonymous SNV	GFRA1:NM_001348099:exon6:c.T845G:p.L282R,GFRA1:NM_145793:exon8:c.T1193G:p.L398R,GFRA1:NM_001145453:exon9:c.T1193G:p.L398R,GFRA1:NM_001348096:exon9:c.T1193G:p.L398R,GFRA1:NM_001348098:exon10:c.T1208G:p.L403R,GFRA1:NM_005264:exon10:c.T1208G:p.L403R	38	chr10	116065616	A	C	AS_SB_TABLE=15,21|0,2;DP=40;ECNT=1;MBQ=36,34;MFRL=172,221;MMQ=60,60;MPOS=21;POPAF=7.30;TLOD=4.17	GT:AD:AF:DP:F1R2:F2R1:SB	0/1	36	2	0.077	38
Pre-Subject 1	chr10	116471848	116471848	G	A	PNLIPRP3	Missense_Mutation	NM_001011709	exon10	c.G1141A	p.V381I	SNP	exonic	PNLIPRP3	.	nonsynonymous SNV	PNLIPRP3:NM_001011709:exon10:c.G1141A:p.V381I	45	chr10	116471848	G	A	AS_SB_TABLE=0,0|11,34;DP=46;ECNT=2;MBQ=0,36;MFRL=0,201;MMQ=60,60;MPOS=20;PON;POPAF=0.018;TLOD=198.20	GT:AD:AF:DP:F1R2:F2R1:PGT:PID:PS:SB	0|1	0	45	0.979	45
Pre-Subject 1	chr10	116471851	116471851	A	G	PNLIPRP3	Missense_Mutation	NM_001011709	exon10	c.A1144G	p.R382G	SNP	exonic	PNLIPRP3	.	nonsynonymous SNV	PNLIPRP3:NM_001011709:exon10:c.A1144G:p.R382G	45	chr10	116471851	A	G	AS_SB_TABLE=0,0|11,34;DP=47;ECNT=2;MBQ=0,36;MFRL=0,201;MMQ=60,60;MPOS=21;PON;POPAF=0.011;TLOD=198.20	GT:AD:AF:DP:F1R2:F2R1:PGT:PID:PS:SB	0|1	0	45	0.979	45
Pre-Subject 1	chr10	117543557	117543557	A	C	EMX2	Missense_Mutation	NM_001165924	exon1	c.A290C	p.H97P	SNP	exonic	EMX2	.	nonsynonymous SNV	EMX2:NM_001165924:exon1:c.A290C:p.H97P,EMX2:NM_004098:exon1:c.A290C:p.H97P	14	chr10	117543557	A	C	AS_SB_TABLE=1,10|3,0;DP=16;ECNT=1;MBQ=36,14;MFRL=209,300;MMQ=60,60;MPOS=13;POPAF=7.30;TLOD=5.66	GT:AD:AF:DP:F1R2:F2R1:SB	0/1	11	3	0.234	14
Pre-Subject 1	chr10	118754429	118754429	T	G	CACUL1	Missense_Mutation	NM_153810	exon1	c.A334C	p.T112P	SNP	exonic	CACUL1	.	nonsynonymous SNV	CACUL1:NM_153810:exon1:c.A334C:p.T112P	43	chr10	118754429	T	G	AS_SB_TABLE=28,9|0,6;DP=45;ECNT=3;MBQ=36,14;MFRL=187,158;MMQ=60,60;MPOS=16;POPAF=7.30;TLOD=3.37	GT:AD:AF:DP:F1R2:F2R1:SB	0/1	37	6	0.124	43
Pre-Subject 1	chr10	118754435	118754435	T	G	CACUL1	Missense_Mutation	NM_153810	exon1	c.A328C	p.S110R	SNP	exonic	CACUL1	.	nonsynonymous SNV	CACUL1:NM_153810:exon1:c.A328C:p.S110R	38	chr10	118754435	T	G	AS_SB_TABLE=23,9|0,6;DP=43;ECNT=3;MBQ=36,14;MFRL=180,187;MMQ=60,60;MPOS=25;POPAF=7.30;TLOD=4.66	GT:AD:AF:DP:F1R2:F2R1:SB	0/1	32	6	0.124	38
Pre-Subject 1	chr10	118754441	118754441	T	G	CACUL1	Missense_Mutation	NM_153810	exon1	c.A322C	p.T108P	SNP	exonic	CACUL1	.	nonsynonymous SNV	CACUL1:NM_153810:exon1:c.A322C:p.T108P	41	chr10	118754441	T	G	AS_SB_TABLE=21,11|0,9;DP=44;ECNT=3;MBQ=36,20;MFRL=172,207;MMQ=60,60;MPOS=6;POPAF=7.30;TLOD=9.55	GT:AD:AF:DP:F1R2:F2R1:SB	0/1	32	9	0.215	41
Pre-Subject 1	chr10	118754657	118754657	G	A	CACUL1	Silent	NM_153810	exon1	c.C106T	p.L36L	SNP	exonic	CACUL1	.	synonymous SNV	CACUL1:NM_153810:exon1:c.C106T:p.L36L	42	chr10	118754657	G	A	AS_SB_TABLE=16,8|11,7;DP=43;ECNT=1;MBQ=36,36;MFRL=218,208;MMQ=60,60;MPOS=22;POPAF=2.86;TLOD=58.45	GT:AD:AF:DP:F1R2:F2R1:SB	0/1	24	18	0.442	42
Pre-Subject 1	chr10	119069457	119069457	A	G	EIF3A	Silent	NM_003750	exon6	c.T939C	p.D313D	SNP	exonic	EIF3A	.	synonymous SNV	EIF3A:NM_003750:exon6:c.T939C:p.D313D	37	chr10	119069457	A	G	AS_SB_TABLE=0,0|37,0;DP=41;ECNT=1;MBQ=0,36;MFRL=0,207;MMQ=60,60;MPOS=18;PON;POPAF=0.069;TLOD=139.79	GT:AD:AF:DP:F1R2:F2R1:SB	0/1	0	37	0.975	37
Pre-Subject 1	chr10	119452748	119452748	A	G	GRK5	Silent	NM_005308	exon14	c.A1482G	p.T494T	SNP	exonic	GRK5	.	synonymous SNV	GRK5:NM_005308:exon14:c.A1482G:p.T494T	31	chr10	119452748	A	G	AS_SB_TABLE=7,13|2,9;DP=32;ECNT=1;MBQ=36,36;MFRL=169,220;MMQ=60,60;MPOS=10;POPAF=4.13;TLOD=32.62	GT:AD:AF:DP:F1R2:F2R1:SB	0/1	20	11	0.4	31
Pre-Subject 1	chr10	122237400	122237400	G	A	TACC2	Silent	NM_206860	exon10	c.G2277A	p.E759E	SNP	exonic	TACC2	.	synonymous SNV	TACC2:NM_206860:exon10:c.G2277A:p.E759E,TACC2:NM_001291878:exon11:c.G2313A:p.E771E,TACC2:NM_001291879:exon11:c.G1014A:p.E338E,TACC2:NM_006997:exon11:c.G2367A:p.E789E,TACC2:NM_001291876:exon14:c.G7767A:p.E2589E,TACC2:NM_001291877:exon14:c.G7914A:p.E2638E,TACC2:NM_206861:exon14:c.G2571A:p.E857E,TACC2:NM_206862:exon17:c.G8133A:p.E2711E	35	chr10	122237400	G	A	AS_SB_TABLE=11,5|11,8;DP=37;ECNT=1;MBQ=36,36;MFRL=269,222;MMQ=60,60;MPOS=20;POPAF=2.90;TLOD=59.38	GT:AD:AF:DP:F1R2:F2R1:SB	0/1	16	19	0.541	35
Pre-Subject 1	chr10	122424238	122424238	C	A	PLEKHA1	Missense_Mutation	NM_001001974	exon9	c.C721A	p.H241N	SNP	exonic	PLEKHA1	.	nonsynonymous SNV	PLEKHA1:NM_001001974:exon9:c.C721A:p.H241N,PLEKHA1:NM_021622:exon9:c.C721A:p.H241N,PLEKHA1:NM_001195608:exon10:c.C721A:p.H241N,PLEKHA1:NM_001330178:exon10:c.C721A:p.H241N	15	chr10	122424238	C	A	AS_SB_TABLE=9,3|3,0;DP=16;ECNT=4;MBQ=36,14;MFRL=206,202;MMQ=60,60;MPOS=3;POPAF=7.30;TLOD=6.12	GT:AD:AF:DP:F1R2:F2R1:SB	0/1	12	3	0.204	15
Pre-Subject 1	chr10	122618285	122618285	T	C	DMBT1	Silent	NM_004406	exon25	c.T2889C	p.N963N	SNP	exonic	DMBT1	.	synonymous SNV	DMBT1:NM_004406:exon25:c.T2889C:p.N963N,DMBT1:NM_017579:exon37:c.T4743C:p.N1581N,DMBT1:NM_001320644:exon38:c.T4773C:p.N1591N,DMBT1:NM_007329:exon38:c.T4773C:p.N1591N	75	chr10	122618285	T	C	AS_SB_TABLE=17,7|42,9;DP=79;ECNT=1;MBQ=36,36;MFRL=208,214;MMQ=40,45;MPOS=12;POPAF=3.61;TLOD=182.61	GT:AD:AF:DP:F1R2:F2R1:SB	0/1	24	51	0.678	75
Pre-Subject 1	chr10	123762015	123762015	T	G	CPXM2	Missense_Mutation	NM_198148	exon11	c.A1634C	p.D545A	SNP	exonic	CPXM2	.	nonsynonymous SNV	CPXM2:NM_198148:exon11:c.A1634C:p.D545A	46	chr10	123762015	T	G	AS_SB_TABLE=30,10|0,6;DP=48;ECNT=3;MBQ=36,14;MFRL=188,205;MMQ=60,60;MPOS=22;POPAF=7.30;TLOD=4.50	GT:AD:AF:DP:F1R2:F2R1:SB	0/1	40	6	0.12	46
Pre-Subject 1	chr10	123762017	123762017	G	A	CPXM2	Silent	NM_198148	exon11	c.C1632T	p.D544D	SNP	exonic	CPXM2	.	synonymous SNV	CPXM2:NM_198148:exon11:c.C1632T:p.D544D	42	chr10	123762017	G	A	AS_SB_TABLE=0,0|29,13;DP=47;ECNT=3;MBQ=0,36;MFRL=0,202;MMQ=60,60;MPOS=15;PON;POPAF=7.30;TLOD=133.23	GT:AD:AF:DP:F1R2:F2R1:SB	0/1	0	42	0.98	42
Pre-Subject 1	chr10	123762025	123762025	T	G	CPXM2	Missense_Mutation	NM_198148	exon11	c.A1624C	p.T542P	SNP	exonic	CPXM2	.	nonsynonymous SNV	CPXM2:NM_198148:exon11:c.A1624C:p.T542P	42	chr10	123762025	T	G	AS_SB_TABLE=29,5|1,7;DP=45;ECNT=3;MBQ=36,14;MFRL=202,207;MMQ=60,60;MPOS=26;POPAF=7.30;TLOD=10.89	GT:AD:AF:DP:F1R2:F2R1:SB	0/1	34	8	0.179	42
Pre-Subject 1	chr10	124447663	124447663	A	C	NKX1-2	Silent	NM_001146340	exon2	c.T699G	p.G233G	SNP	exonic	NKX1-2	.	synonymous SNV	NKX1-2:NM_001146340:exon2:c.T699G:p.G233G	42	chr10	124447663	A	C	AS_SB_TABLE=26,10|6,0;DP=45;ECNT=1;MBQ=32,14;MFRL=170,173;MMQ=60,60;MPOS=26;POPAF=7.30;TLOD=7.16	GT:AD:AF:DP:F1R2:F2R1:SB	0/1	36	6	0.149	42
Pre-Subject 1	chr10	124449878	124449878	G	C	NKX1-2	Silent	NM_001146340	exon1	c.C66G	p.V22V	SNP	exonic	NKX1-2	.	synonymous SNV	NKX1-2:NM_001146340:exon1:c.C66G:p.V22V	41	chr10	124449878	G	C	AS_SB_TABLE=12,27|0,2;DP=47;ECNT=1;MBQ=36,36;MFRL=167,205;MMQ=60,60;MPOS=17;POPAF=7.30;TLOD=3.66	GT:AD:AF:DP:F1R2:F2R1:SB	0/1	39	2	0.072	41
Pre-Subject 1	chr10	124943102	124943102	G	A	ZRANB1	Nonsense_Mutation	NM_017580	exon1	c.G609A	p.W203X	SNP	exonic	ZRANB1	.	stopgain	ZRANB1:NM_017580:exon1:c.G609A:p.W203X	36	chr10	124943102	G	A	AS_SB_TABLE=13,21|0,2;DP=39;ECNT=1;MBQ=36,36;MFRL=228,201;MMQ=60,60;MPOS=13;POPAF=7.30;TLOD=3.81	GT:AD:AF:DP:F1R2:F2R1:SB	0/1	34	2	0.08	36
Pre-Subject 1	chr10	125661967	125661967	A	T	TEX36	Missense_Mutation	NM_001128202	exon2	c.T62A	p.I21N	SNP	exonic	TEX36	.	nonsynonymous SNV	TEX36:NM_001128202:exon2:c.T62A:p.I21N,TEX36:NM_001318133:exon2:c.T62A:p.I21N	35	chr10	125661967	A	T	AS_SB_TABLE=5,10|7,13;DP=35;ECNT=1;MBQ=36,36;MFRL=246,182;MMQ=60,60;MPOS=14;POPAF=2.99;TLOD=59.13	GT:AD:AF:DP:F1R2:F2R1:SB	0/1	15	20	0.54	35
Pre-Subject 1	chr10	128070400	128070400	C	T	PTPRE	Missense_Mutation	NM_001323357	exon10	c.C583T	p.H195Y	SNP	exonic	PTPRE	.	nonsynonymous SNV	PTPRE:NM_001323357:exon10:c.C583T:p.H195Y,PTPRE:NM_130435:exon11:c.C1069T:p.H357Y,PTPRE:NM_001316677:exon13:c.C1243T:p.H415Y,PTPRE:NM_001323354:exon13:c.C1243T:p.H415Y,PTPRE:NM_001323355:exon13:c.C1303T:p.H435Y,PTPRE:NM_001323356:exon13:c.C1297T:p.H433Y,PTPRE:NM_006504:exon14:c.C1243T:p.H415Y,PTPRE:NM_001316676:exon15:c.C1276T:p.H426Y	38	chr10	128070400	C	T	AS_SB_TABLE=17,19|1,1;DP=42;ECNT=1;MBQ=36,36;MFRL=191,227;MMQ=60,60;MPOS=14;POPAF=7.30;TLOD=3.74	GT:AD:AF:DP:F1R2:F2R1:SB	0/1	36	2	0.076	38
Pre-Subject 1	chr10	128116523	128116523	C	T	MKI67	Missense_Mutation	NM_001145966	exon6	c.G368A	p.R123H	SNP	exonic	MKI67	.	nonsynonymous SNV	MKI67:NM_001145966:exon6:c.G368A:p.R123H,MKI67:NM_002417:exon6:c.G368A:p.R123H	41	chr10	128116523	C	T	AS_SB_TABLE=10,14|5,12;DP=46;ECNT=1;MBQ=36,36;MFRL=210,217;MMQ=60,60;MPOS=10;POPAF=2.08;TLOD=51.21	GT:AD:AF:DP:F1R2:F2R1:SB	0/1	24	17	0.415	41
Pre-Subject 1	chr10	132203791	132203791	A	G	DPYSL4	Silent	NM_006426	exon13	c.A1491G	p.G497G	SNP	exonic	DPYSL4	.	synonymous SNV	DPYSL4:NM_006426:exon13:c.A1491G:p.G497G	26	chr10	132203791	A	G	AS_SB_TABLE=0,0|23,3;DP=27;ECNT=2;MBQ=0,36;MFRL=0,195;MMQ=60,60;MPOS=18;PON;POPAF=0.091;TLOD=108.03	GT:AD:AF:DP:F1R2:F2R1:SB	0/1	0	26	0.964	26
Pre-Subject 1	chr10	132203800	132203800	C	T	DPYSL4	Silent	NM_006426	exon13	c.C1500T	p.D500D	SNP	exonic	DPYSL4	.	synonymous SNV	DPYSL4:NM_006426:exon13:c.C1500T:p.D500D	29	chr10	132203800	C	T	AS_SB_TABLE=15,2|10,2;DP=32;ECNT=2;MBQ=36,36;MFRL=167,213;MMQ=60,60;MPOS=25;POPAF=3.65;TLOD=36.73	GT:AD:AF:DP:F1R2:F2R1:SB	0/1	17	12	0.414	29
Pre-Subject 1	chr10	132331632	132331632	A	G	STK32C	Silent	NM_001318878	exon1	c.T105C	p.G35G	SNP	exonic	STK32C	.	synonymous SNV	STK32C:NM_001318878:exon1:c.T105C:p.G35G,STK32C:NM_001318880:exon1:c.T105C:p.G35G,STK32C:NM_001318881:exon1:c.T105C:p.G35G,STK32C:NM_001318882:exon1:c.T105C:p.G35G,STK32C:NM_001318883:exon1:c.T105C:p.G35G	39	chr10	132331632	A	G	AS_SB_TABLE=0,0|10,29;DP=41;ECNT=4;MBQ=0,36;MFRL=0,195;MMQ=60,60;MPOS=21;PON;POPAF=0.424;TLOD=184.20	GT:AD:AF:DP:F1R2:F2R1:PGT:PID:PS:SB	0|1	0	39	0.976	39
Pre-Subject 1	chr10	132331634	132331634	C	G	STK32C	Missense_Mutation	NM_001318878	exon1	c.G103C	p.G35R	SNP	exonic	STK32C	.	nonsynonymous SNV	STK32C:NM_001318878:exon1:c.G103C:p.G35R,STK32C:NM_001318880:exon1:c.G103C:p.G35R,STK32C:NM_001318881:exon1:c.G103C:p.G35R,STK32C:NM_001318882:exon1:c.G103C:p.G35R,STK32C:NM_001318883:exon1:c.G103C:p.G35R	41	chr10	132331634	C	G	AS_SB_TABLE=0,0|11,30;DP=41;ECNT=4;MBQ=0,36;MFRL=0,194;MMQ=60,60;MPOS=19;PON;POPAF=0.424;TLOD=188.69	GT:AD:AF:DP:F1R2:F2R1:PGT:PID:PS:SB	0|1	0	41	0.977	41
Pre-Subject 1	chr10	132331649	132331649	G	A	STK32C	Missense_Mutation	NM_001318878	exon1	c.C88T	p.H30Y	SNP	exonic	STK32C	.	nonsynonymous SNV	STK32C:NM_001318878:exon1:c.C88T:p.H30Y,STK32C:NM_001318880:exon1:c.C88T:p.H30Y,STK32C:NM_001318881:exon1:c.C88T:p.H30Y,STK32C:NM_001318882:exon1:c.C88T:p.H30Y,STK32C:NM_001318883:exon1:c.C88T:p.H30Y	39	chr10	132331649	G	A	AS_SB_TABLE=0,0|12,27;DP=39;ECNT=4;MBQ=0,36;MFRL=0,195;MMQ=60,60;MPOS=22;PON;POPAF=0.636;TLOD=171.88	GT:AD:AF:DP:F1R2:F2R1:PGT:PID:PS:SB	0|1	0	39	0.974	39
Pre-Subject 1	chr10	132331662	132331662	T	C	STK32C	Silent	NM_001318878	exon1	c.A75G	p.E25E	SNP	exonic	STK32C	.	synonymous SNV	STK32C:NM_001318878:exon1:c.A75G:p.E25E,STK32C:NM_001318880:exon1:c.A75G:p.E25E,STK32C:NM_001318881:exon1:c.A75G:p.E25E,STK32C:NM_001318882:exon1:c.A75G:p.E25E,STK32C:NM_001318883:exon1:c.A75G:p.E25E	30	chr10	132331662	T	C	AS_SB_TABLE=0,0|8,22;DP=31;ECNT=4;MBQ=0,36;MFRL=0,195;MMQ=60,60;MPOS=21;PON;POPAF=0.426;TLOD=135.98	GT:AD:AF:DP:F1R2:F2R1:PGT:PID:PS:SB	0|1	0	30	0.968	30
Pre-Subject 1	chr10	133220031	133220031	A	C	KNDC1	Missense_Mutation	NM_152643	exon29	c.A4937C	p.H1646P	SNP	exonic	KNDC1	.	nonsynonymous SNV	KNDC1:NM_152643:exon29:c.A4937C:p.H1646P	43	chr10	133220031	A	C	AS_SB_TABLE=14,24|4,1;DP=46;ECNT=1;MBQ=36,14;MFRL=168,182;MMQ=60,60;MPOS=1;POPAF=7.30;TLOD=4.48	GT:AD:AF:DP:F1R2:F2R1:SB	0/1	38	5	0.111	43
Pre-Subject 1	chr10	133292510	133292510	G	A	TUBGCP2	Silent	NM_001256618	exon7	c.C813T	p.H271H	SNP	exonic	TUBGCP2	.	synonymous SNV	TUBGCP2:NM_001256618:exon7:c.C813T:p.H271H,TUBGCP2:NM_006659:exon8:c.C1203T:p.H401H,TUBGCP2:NM_001256617:exon9:c.C1287T:p.H429H	15	chr10	133292510	G	A	AS_SB_TABLE=6,4|5,0;DP=16;ECNT=2;MBQ=36,36;MFRL=148,236;MMQ=60,60;MPOS=28;POPAF=2.56;TLOD=15.48	GT:AD:AF:DP:F1R2:F2R1:SB	0/1	10	5	0.374	15
Pre-Subject 1	chr11	236094	236094	A	G	SIRT3	Missense_Mutation	NM_001370310	exon1	c.T235C	p.F79L	SNP	exonic	SIRT3	.	nonsynonymous SNV	SIRT3:NM_001370310:exon1:c.T235C:p.F79L,SIRT3:NM_001370312:exon1:c.T235C:p.F79L,SIRT3:NM_001370314:exon1:c.T235C:p.F79L,SIRT3:NM_012239:exon1:c.T235C:p.F79L	18	chr11	236094	A	G	AS_SB_TABLE=5,5|4,4;DP=21;ECNT=1;MBQ=36,36;MFRL=204,144;MMQ=60,60;MPOS=22;POPAF=2.39;TLOD=24.06	GT:AD:AF:DP:F1R2:F2R1:SB	0/1	10	8	0.444	18
Pre-Subject 1	chr11	244106	244106	A	G	PSMD13	Missense_Mutation	NM_175932	exon2	c.A161G	p.E54G	SNP	exonic	PSMD13	.	nonsynonymous SNV	PSMD13:NM_175932:exon2:c.A161G:p.E54G	37	chr11	244106	A	G	AS_SB_TABLE=11,7|9,10;DP=39;ECNT=5;MBQ=36,36;MFRL=188,202;MMQ=60,60;MPOS=20;PON;POPAF=0.104;TLOD=74.28	GT:AD:AF:DP:F1R2:F2R1:PGT:PID:PS:SB	0|1	18	19	0.514	37
Pre-Subject 1	chr11	244108	244108	A	G	PSMD13	Missense_Mutation	NM_175932	exon2	c.A163G	p.N55D	SNP	exonic	PSMD13	.	nonsynonymous SNV	PSMD13:NM_175932:exon2:c.A163G:p.N55D	37	chr11	244108	A	G	AS_SB_TABLE=11,7|9,10;DP=37;ECNT=5;MBQ=36,36;MFRL=188,202;MMQ=60,60;MPOS=18;PON;POPAF=0.104;TLOD=74.29	GT:AD:AF:DP:F1R2:F2R1:PGT:PID:PS:SB	0|1	18	19	0.514	37
Pre-Subject 1	chr11	244115	244115	G	A	PSMD13	Missense_Mutation	NM_175932	exon2	c.G170A	p.C57Y	SNP	exonic	PSMD13	.	nonsynonymous SNV	PSMD13:NM_175932:exon2:c.G170A:p.C57Y	38	chr11	244115	G	A	AS_SB_TABLE=9,7|12,10;DP=38;ECNT=5;MBQ=36,36;MFRL=188,202;MMQ=60,60;MPOS=15;PON;POPAF=0.104;TLOD=84.84	GT:AD:AF:DP:F1R2:F2R1:PGT:PID:PS:SB	0|1	16	22	0.564	38
Pre-Subject 1	chr11	244129	244129	C	T	PSMD13	Missense_Mutation	NM_175932	exon2	c.C184T	p.R62W	SNP	exonic	PSMD13	.	nonsynonymous SNV	PSMD13:NM_175932:exon2:c.C184T:p.R62W	38	chr11	244129	C	T	AS_SB_TABLE=11,7|10,10;DP=42;ECNT=5;MBQ=36,36;MFRL=187,202;MMQ=60,60;MPOS=22;PON;POPAF=0.103;TLOD=55.38	GT:AD:AF:DP:F1R2:F2R1:SB	0/1	18	20	0.529	38
Pre-Subject 1	chr11	244141	244141	G	A	PSMD13	Missense_Mutation	NM_175932	exon2	c.G196A	p.A66T	SNP	exonic	PSMD13	.	nonsynonymous SNV	PSMD13:NM_175932:exon2:c.G196A:p.A66T	42	chr11	244141	G	A	AS_SB_TABLE=11,9|12,10;DP=43;ECNT=5;MBQ=36,36;MFRL=194,202;MMQ=60,60;MPOS=20;PON;POPAF=0.103;TLOD=66.24	GT:AD:AF:DP:F1R2:F2R1:SB	0/1	20	22	0.516	42
Pre-Subject 1	chr11	1186087	1186087	T	A	MUC5AC	Missense_Mutation	NM_001304359	exon31	c.T7942A	p.S2648T	SNP	exonic	MUC5AC	.	nonsynonymous SNV	MUC5AC:NM_001304359:exon31:c.T7942A:p.S2648T	27	chr11	1186087	T	A	AS_SB_TABLE=4,19|4,0;DP=30;ECNT=5;MBQ=32,14;MFRL=196,286;MMQ=60,51;MPOS=24;POPAF=7.30;TLOD=9.66	GT:AD:AF:DP:F1R2:F2R1:PGT:PID:PS:SB	0|1	23	4	0.167	27
Pre-Subject 1	chr11	1186095	1186095	T	A	MUC5AC	Silent	NM_001304359	exon31	c.T7950A	p.T2650T	SNP	exonic	MUC5AC	.	synonymous SNV	MUC5AC:NM_001304359:exon31:c.T7950A:p.T2650T	26	chr11	1186095	T	A	AS_SB_TABLE=4,18|4,0;DP=28;ECNT=5;MBQ=36,30;MFRL=202,286;MMQ=60,51;MPOS=16;POPAF=7.30;TLOD=9.67	GT:AD:AF:DP:F1R2:F2R1:PGT:PID:PS:SB	0|1	22	4	0.168	26
Pre-Subject 1	chr11	1186109	1186109	G	C	MUC5AC	Missense_Mutation	NM_001304359	exon31	c.G7964C	p.G2655A	SNP	exonic	MUC5AC	.	nonsynonymous SNV	MUC5AC:NM_001304359:exon31:c.G7964C:p.G2655A	24	chr11	1186109	G	C	AS_SB_TABLE=6,14|4,0;DP=26;ECNT=5;MBQ=36,18;MFRL=219,286;MMQ=60,51;MPOS=13;POPAF=7.30;TLOD=9.93	GT:AD:AF:DP:F1R2:F2R1:PGT:PID:PS:SB	0|1	20	4	0.187	24
Pre-Subject 1	chr11	1186113	1186113	-	ACAACA	MUC5AC	In_Frame_Ins	NM_001304359	exon31	c.7968_7969insACAACA	p.P2656_G2657insTT	INS	exonic	MUC5AC	.	nonframeshift insertion	MUC5AC:NM_001304359:exon31:c.7968_7969insACAACA:p.P2656_G2657insTT	22	chr11	1186113	T	TACAACA	AS_SB_TABLE=7,13|2,0;DP=23;ECNT=5;MBQ=36,30;MFRL=220,303;MMQ=59,43;MPOS=9;POPAF=7.30;TLOD=5.25	GT:AD:AF:DP:F1R2:F2R1:PGT:PID:PS:SB	0|1	20	2	0.123	22
Pre-Subject 1	chr11	1186114	1186114	G	A	MUC5AC	Missense_Mutation	NM_001304359	exon31	c.G7969A	p.G2657R	SNP	exonic	MUC5AC	.	nonsynonymous SNV	MUC5AC:NM_001304359:exon31:c.G7969A:p.G2657R	22	chr11	1186114	G	A	AS_SB_TABLE=7,13|2,0;DP=23;ECNT=5;MBQ=36,36;MFRL=220,303;MMQ=59,43;MPOS=11;POPAF=7.30;TLOD=5.25	GT:AD:AF:DP:F1R2:F2R1:PGT:PID:PS:SB	0|1	20	2	0.123	22
Pre-Subject 1	chr11	1187284	1187284	T	A	MUC5AC	Missense_Mutation	NM_001304359	exon31	c.T9139A	p.S3047T	SNP	exonic	MUC5AC	.	nonsynonymous SNV	MUC5AC:NM_001304359:exon31:c.T9139A:p.S3047T	17	chr11	1187284	T	A	AS_SB_TABLE=0,0|11,6;DP=19;ECNT=1;MBQ=0,36;MFRL=0,183;MMQ=60,60;MPOS=23;PON;POPAF=7.30;TLOD=51.38	GT:AD:AF:DP:F1R2:F2R1:SB	0/1	0	17	0.949	17
Pre-Subject 1	chr11	1187548	1187548	C	G	MUC5AC	Missense_Mutation	NM_001304359	exon31	c.C9403G	p.P3135A	SNP	exonic	MUC5AC	.	nonsynonymous SNV	MUC5AC:NM_001304359:exon31:c.C9403G:p.P3135A	33	chr11	1187548	C	G	AS_SB_TABLE=14,13|0,6;DP=34;ECNT=1;MBQ=32,18;MFRL=196,229;MMQ=60,54;MPOS=10;POPAF=7.30;TLOD=4.71	GT:AD:AF:DP:F1R2:F2R1:SB	0/1	27	6	0.171	33
Pre-Subject 1	chr11	1191524	1191524	T	C	MUC5AC	Missense_Mutation	NM_001304359	exon31	c.T13379C	p.L4460P	SNP	exonic	MUC5AC	.	nonsynonymous SNV	MUC5AC:NM_001304359:exon31:c.T13379C:p.L4460P	51	chr11	1191524	T	C	AS_SB_TABLE=0,1|24,26;DP=51;ECNT=2;MBQ=14,36;MFRL=178,210;MMQ=23,60;MPOS=24;PON;POPAF=7.30;TLOD=208.22	GT:AD:AF:DP:F1R2:F2R1:PGT:PID:PS:SB	0|1	1	50	0.979	51
Pre-Subject 1	chr11	1191527	1191527	C	T	MUC5AC	Missense_Mutation	NM_001304359	exon31	c.C13382T	p.P4461L	SNP	exonic	MUC5AC	.	nonsynonymous SNV	MUC5AC:NM_001304359:exon31:c.C13382T:p.P4461L	50	chr11	1191527	C	T	AS_SB_TABLE=0,1|24,25;DP=54;ECNT=2;MBQ=14,32;MFRL=178,209;MMQ=23,60;MPOS=24;PON;POPAF=7.30;TLOD=205.07	GT:AD:AF:DP:F1R2:F2R1:PGT:PID:PS:SB	0|1	1	49	0.979	50
Pre-Subject 1	chr11	1243333	1243333	A	C	MUC5B	Silent	NM_002458	exon31	c.A6453C	p.S2151S	SNP	exonic	MUC5B	.	synonymous SNV	MUC5B:NM_002458:exon31:c.A6453C:p.S2151S	19	chr11	1243333	A	C	AS_SB_TABLE=3,13|1,2;DP=19;ECNT=2;MBQ=36,14;MFRL=189,294;MMQ=27,27;MPOS=9;POPAF=7.30;TLOD=3.29	GT:AD:AF:DP:F1R2:F2R1:PGT:PID:PS:SB	0|1	16	3	0.169	19
Pre-Subject 1	chr11	1243336	1243336	T	G	MUC5B	Silent	NM_002458	exon31	c.T6456G	p.T2152T	SNP	exonic	MUC5B	.	synonymous SNV	MUC5B:NM_002458:exon31:c.T6456G:p.T2152T	19	chr11	1243336	T	G	AS_SB_TABLE=3,13|1,2;DP=19;ECNT=2;MBQ=36,14;MFRL=189,294;MMQ=27,27;MPOS=12;POPAF=7.30;TLOD=3.29	GT:AD:AF:DP:F1R2:F2R1:PGT:PID:PS:SB	0|1	16	3	0.169	19
Pre-Subject 1	chr11	1246730	1246730	A	G	MUC5B	Missense_Mutation	NM_002458	exon31	c.A9850G	p.T3284A	SNP	exonic	MUC5B	.	nonsynonymous SNV	MUC5B:NM_002458:exon31:c.A9850G:p.T3284A	32	chr11	1246730	A	G	AS_SB_TABLE=0,0|15,17;DP=34;ECNT=1;MBQ=0,36;MFRL=0,208;MMQ=60,36;MPOS=19;PON;POPAF=0.101;TLOD=97.83	GT:AD:AF:DP:F1R2:F2R1:SB	0/1	0	32	0.971	32
Pre-Subject 1	chr11	1248281	1248281	T	A	MUC5B	Missense_Mutation	NM_002458	exon31	c.T11401A	p.S3801T	SNP	exonic	MUC5B	.	nonsynonymous SNV	MUC5B:NM_002458:exon31:c.T11401A:p.S3801T	22	chr11	1248281	T	A	AS_SB_TABLE=16,3|3,0;DP=22;ECNT=2;MBQ=32,14;MFRL=236,306;MMQ=25,25;MPOS=7;POPAF=7.30;TLOD=3.97	GT:AD:AF:DP:F1R2:F2R1:PGT:PID:PS:SB	0|1	19	3	0.149	22
Pre-Subject 1	chr11	1249694	1249694	A	C	MUC5B	Missense_Mutation	NM_002458	exon31	c.A12814C	p.T4272P	SNP	exonic	MUC5B	.	nonsynonymous SNV	MUC5B:NM_002458:exon31:c.A12814C:p.T4272P	81	chr11	1249694	A	C	AS_SB_TABLE=35,36|10,0;DP=89;ECNT=2;MBQ=32,14;MFRL=199,199;MMQ=60,60;MPOS=18;POPAF=7.30;TLOD=3.44	GT:AD:AF:DP:F1R2:F2R1:SB	0/1	71	10	0.09	81
Pre-Subject 1	chr11	1249702	1249702	A	C	MUC5B	Silent	NM_002458	exon31	c.A12822C	p.G4274G	SNP	exonic	MUC5B	.	synonymous SNV	MUC5B:NM_002458:exon31:c.A12822C:p.G4274G	74	chr11	1249702	A	C	AS_SB_TABLE=30,37|7,0;DP=82;ECNT=2;MBQ=36,14;MFRL=189,173;MMQ=60,60;MPOS=18;POPAF=7.30;TLOD=4.08	GT:AD:AF:DP:F1R2:F2R1:SB	0/1	67	7	0.082	74
Pre-Subject 1	chr11	1250091	1250091	C	G	MUC5B	Missense_Mutation	NM_002458	exon31	c.C13211G	p.A4404G	SNP	exonic	MUC5B	.	nonsynonymous SNV	MUC5B:NM_002458:exon31:c.C13211G:p.A4404G	56	chr11	1250091	C	G	AS_SB_TABLE=1,0|19,36;DP=59;ECNT=2;MBQ=14,32;MFRL=169,231;MMQ=40,40;MPOS=16;PON;POPAF=0.365;TLOD=164.55	GT:AD:AF:DP:F1R2:F2R1:SB	0/1	1	55	0.981	56
Pre-Subject 1	chr11	1250199	1250199	C	T	MUC5B	Missense_Mutation	NM_002458	exon31	c.C13319T	p.P4440L	SNP	exonic	MUC5B	.	nonsynonymous SNV	MUC5B:NM_002458:exon31:c.C13319T:p.P4440L	58	chr11	1250199	C	T	AS_SB_TABLE=0,1|28,29;DP=66;ECNT=2;MBQ=14,20;MFRL=163,216;MMQ=40,40;MPOS=16;PON;POPAF=0.360;TLOD=127.27	GT:AD:AF:DP:F1R2:F2R1:SB	0/1	1	57	0.981	58
Pre-Subject 1	chr11	1470231	1470231	T	A	MOB2	Missense_Mutation	NM_001172223	exon5	c.A748T	p.S250C	SNP	exonic	MOB2	.	nonsynonymous SNV	MOB2:NM_001172223:exon5:c.A748T:p.S250C	29	chr11	1470231	T	A	AS_SB_TABLE=10,16|3,0;DP=30;ECNT=2;MBQ=36,14;MFRL=208,267;MMQ=60,60;MPOS=27;POPAF=7.30;TLOD=6.19	GT:AD:AF:DP:F1R2:F2R1:PGT:PID:PS:SB	0|1	26	3	0.127	29
Pre-Subject 1	chr11	1470243	1470243	G	T	MOB2	Missense_Mutation	NM_001172223	exon5	c.C736A	p.H246N	SNP	exonic	MOB2	.	nonsynonymous SNV	MOB2:NM_001172223:exon5:c.C736A:p.H246N	34	chr11	1470243	G	T	AS_SB_TABLE=11,21|2,0;DP=34;ECNT=2;MBQ=36,14;MFRL=208,238;MMQ=60,60;MPOS=24;POPAF=7.30;TLOD=4.71	GT:AD:AF:DP:F1R2:F2R1:PGT:PID:PS:SB	0|1	32	2	0.084	34
Pre-Subject 1	chr11	1866576	1866576	T	A	LSP1	Missense_Mutation	NM_001242932	exon2	c.T102A	p.H34Q	SNP	exonic	LSP1	.	nonsynonymous SNV	LSP1:NM_001242932:exon2:c.T102A:p.H34Q	19	chr11	1866576	T	A	AS_SB_TABLE=2,10|2,5;DP=21;ECNT=1;MBQ=36,36;MFRL=197,208;MMQ=60,60;MPOS=8;PON;POPAF=0.226;TLOD=15.99	GT:AD:AF:DP:F1R2:F2R1:SB	0/1	12	7	0.365	19
Pre-Subject 1	chr11	2317355	2317355	G	A	TSPAN32	Missense_Mutation	NM_139022	exon9	c.G731A	p.R244H	SNP	exonic	TSPAN32	.	nonsynonymous SNV	TSPAN32:NM_139022:exon9:c.G731A:p.R244H	44	chr11	2317355	G	A	AS_SB_TABLE=4,12|15,13;DP=48;ECNT=1;MBQ=36,36;MFRL=195,212;MMQ=60,60;MPOS=18;POPAF=4.13;TLOD=96.24	GT:AD:AF:DP:F1R2:F2R1:SB	0/1	16	28	0.662	44
Pre-Subject 1	chr11	3359235	3359235	T	G	ZNF195	Silent	NM_007152	exon4	c.A1557C	p.S519S	SNP	exonic	ZNF195	.	synonymous SNV	ZNF195:NM_007152:exon4:c.A1557C:p.S519S,ZNF195:NM_001130519:exon5:c.A1704C:p.S568S,ZNF195:NM_001242843:exon5:c.A1569C:p.S523S,ZNF195:NM_001256825:exon5:c.A1569C:p.S523S,ZNF195:NM_001130520:exon6:c.A1773C:p.S591S,ZNF195:NM_001242841:exon6:c.A1716C:p.S572S,ZNF195:NM_001242842:exon6:c.A1638C:p.S546S,ZNF195:NM_001256824:exon6:c.A1662C:p.S554S	78	chr11	3359235	T	G	AS_SB_TABLE=36,38|0,4;DP=86;ECNT=1;MBQ=36,32;MFRL=187,134;MMQ=51,50;MPOS=1;POPAF=2.91;TLOD=6.64	GT:AD:AF:DP:F1R2:F2R1:SB	0/1	74	4	0.063	78
Pre-Subject 1	chr11	3640355	3640355	-	TGG	ART5	In_Frame_Ins	NM_001297668	exon2	c.73_74insCCA	p.P24_I25insT	INS	exonic	ART5	.	nonframeshift insertion	ART5:NM_001297668:exon2:c.73_74insCCA:p.P24_I25insT,ART5:NM_053017:exon2:c.73_74insCCA:p.P24_I25insT,ART5:NM_001079536:exon3:c.73_74insCCA:p.P24_I25insT	50	chr11	3640355	A	ATGG	AS_SB_TABLE=0,2|10,38;DP=55;ECNT=1;MBQ=25,36;MFRL=243,202;MMQ=60,60;MPOS=19;PON;POPAF=0.011;RPA=1,2;RU=TGG;STR;TLOD=149.51	GT:AD:AF:DP:F1R2:F2R1:SB	0/1	2	48	0.976	50
Pre-Subject 1	chr11	3667569	3667569	C	T	CHRNA10	Silent	NM_020402	exon4	c.G558A	p.P186P	SNP	exonic	CHRNA10	.	synonymous SNV	CHRNA10:NM_020402:exon4:c.G558A:p.P186P	45	chr11	3667569	C	T	AS_SB_TABLE=13,5|19,8;DP=47;ECNT=1;MBQ=34,36;MFRL=255,201;MMQ=60,60;MPOS=12;POPAF=2.91;TLOD=90.73	GT:AD:AF:DP:F1R2:F2R1:SB	0/1	18	27	0.607	45
Pre-Subject 1	chr11	4682508	4682508	A	G	OR51E2	Silent	NM_030774	exon2	c.T204C	p.I68I	SNP	exonic	OR51E2	.	synonymous SNV	OR51E2:NM_030774:exon2:c.T204C:p.I68I	62	chr11	4682508	A	G	AS_SB_TABLE=27,33|1,1;DP=68;ECNT=2;MBQ=36,36;MFRL=198,162;MMQ=60,60;MPOS=19;POPAF=7.30;TLOD=3.09	GT:AD:AF:DP:F1R2:F2R1:PGT:PID:PS:SB	0|1	60	2	0.047	62
Pre-Subject 1	chr11	4682532	4682532	G	T	OR51E2	Silent	NM_030774	exon2	c.C180A	p.L60L	SNP	exonic	OR51E2	.	synonymous SNV	OR51E2:NM_030774:exon2:c.C180A:p.L60L	55	chr11	4682532	G	T	AS_SB_TABLE=15,17|12,11;DP=59;ECNT=2;MBQ=36,36;MFRL=194,184;MMQ=60,60;MPOS=16;PON;POPAF=1.30;TLOD=74.60	GT:AD:AF:DP:F1R2:F2R1:PGT:PID:PS:SB	1|0	32	23	0.421	55
Pre-Subject 1	chr11	4769718	4769718	C	A	OR51F1	Missense_Mutation	NM_001004752	exon1	c.G221T	p.R74M	SNP	exonic	OR51F1	.	nonsynonymous SNV	OR51F1:NM_001004752:exon1:c.G221T:p.R74M	62	chr11	4769718	C	A	AS_SB_TABLE=0,0|42,20;DP=63;ECNT=2;MBQ=0,36;MFRL=0,235;MMQ=60,60;MPOS=18;PON;POPAF=0.585;TLOD=273.03	GT:AD:AF:DP:F1R2:F2R1:PGT:PID:PS:SB	0|1	0	62	0.984	62
Pre-Subject 1	chr11	4769721	4769721	A	G	OR51F1	Missense_Mutation	NM_001004752	exon1	c.T218C	p.F73S	SNP	exonic	OR51F1	.	nonsynonymous SNV	OR51F1:NM_001004752:exon1:c.T218C:p.F73S	64	chr11	4769721	A	G	AS_SB_TABLE=0,0|43,21;DP=67;ECNT=2;MBQ=0,36;MFRL=0,235;MMQ=60,60;MPOS=19;PON;POPAF=0.588;TLOD=279.77	GT:AD:AF:DP:F1R2:F2R1:PGT:PID:PS:SB	0|1	0	64	0.985	64
Pre-Subject 1	chr11	4999477	4999477	G	A	OR51L1	Silent	NM_001004755	exon1	c.G495A	p.L165L	SNP	exonic	OR51L1	.	synonymous SNV	OR51L1:NM_001004755:exon1:c.G495A:p.L165L	88	chr11	4999477	G	A	AS_SB_TABLE=29,42|7,10;DP=90;ECNT=1;MBQ=36,36;MFRL=227,177;MMQ=60,60;MPOS=16;POPAF=2.37;TLOD=48.05	GT:AD:AF:DP:F1R2:F2R1:SB	0/1	71	17	0.203	88
Pre-Subject 1	chr11	5058716	5058716	C	T	OR52E2	Silent	NM_001005164	exon1	c.G912A	p.V304V	SNP	exonic	OR52E2	.	synonymous SNV	OR52E2:NM_001005164:exon1:c.G912A:p.V304V	55	chr11	5058716	C	T	AS_SB_TABLE=0,0|23,32;DP=58;ECNT=1;MBQ=0,36;MFRL=0,189;MMQ=60,60;MPOS=14;PON;POPAF=0.025;TLOD=203.63	GT:AD:AF:DP:F1R2:F2R1:SB	0/1	0	55	0.981	55
Pre-Subject 1	chr11	5178110	5178110	-	ATGCCC	OR52Z1	In_Frame_Ins	NM_001348257	exon1	c.500_501insGGGCAT	p.H166_I167insMG	INS	exonic	OR52Z1	.	nonframeshift insertion	OR52Z1:NM_001348257:exon1:c.500_501insGGGCAT:p.H166_I167insMG	37	chr11	5178110	A	AATGCCC	AS_SB_TABLE=0,0|26,11;DP=41;ECNT=1;MBQ=0,36;MFRL=0,206;MMQ=60,60;MPOS=19;PON;POPAF=0.141;TLOD=163.36	GT:AD:AF:DP:F1R2:F2R1:SB	0/1	0	37	0.976	37
Pre-Subject 1	chr11	5390243	5390243	C	A	OR51M1	Missense_Mutation	NM_001004756	exon1	c.C845A	p.P282H	SNP	exonic	OR51M1	.	nonsynonymous SNV	OR51M1:NM_001004756:exon1:c.C845A:p.P282H	67	chr11	5390243	C	A	AS_SB_TABLE=27,11|16,13;DP=69;ECNT=3;MBQ=36,36;MFRL=233,223;MMQ=60,60;MPOS=21;POPAF=2.29;TLOD=87.84	GT:AD:AF:DP:F1R2:F2R1:SB	0/1	38	29	0.439	67
Pre-Subject 1	chr11	5390282	5390282	T	A	OR51M1	Missense_Mutation	NM_001004756	exon1	c.T884A	p.V295E	SNP	exonic	OR51M1	.	nonsynonymous SNV	OR51M1:NM_001004756:exon1:c.T884A:p.V295E	79	chr11	5390282	T	A	AS_SB_TABLE=26,17|17,19;DP=83;ECNT=3;MBQ=36,36;MFRL=190,214;MMQ=60,60;MPOS=16;POPAF=7.30;TLOD=111.44	GT:AD:AF:DP:F1R2:F2R1:SB	0/1	43	36	0.462	79
Pre-Subject 1	chr11	5788078	5788078	A	T	OR52N1	Missense_Mutation	NM_001001913	exon1	c.T739A	p.F247I	SNP	exonic	OR52N1	.	nonsynonymous SNV	OR52N1:NM_001001913:exon1:c.T739A:p.F247I	60	chr11	5788078	A	T	AS_SB_TABLE=0,0|29,31;DP=62;ECNT=1;MBQ=0,36;MFRL=0,243;MMQ=60,60;MPOS=26;PON;POPAF=0.026;TLOD=236.52	GT:AD:AF:DP:F1R2:F2R1:SB	0/1	0	60	0.984	60
Pre-Subject 1	chr11	6199984	6199984	T	A	OR52W1	Missense_Mutation	NM_001005178	exon1	c.T761A	p.L254Q	SNP	exonic	OR52W1	.	nonsynonymous SNV	OR52W1:NM_001005178:exon1:c.T761A:p.L254Q	54	chr11	6199984	T	A	AS_SB_TABLE=15,12|12,15;DP=54;ECNT=1;MBQ=36,36;MFRL=222,215;MMQ=60,60;MPOS=21;PON;POPAF=0.197;TLOD=85.77	GT:AD:AF:DP:F1R2:F2R1:SB	0/1	27	27	0.508	54
Pre-Subject 1	chr11	6390706	6390711	GCTGGC	-	SMPD1	In_Frame_Del	NM_000543	exon1	c.108_113del	p.A48_L49del	DEL	exonic	SMPD1	.	nonframeshift deletion	SMPD1:NM_000543:exon1:c.108_113del:p.A48_L49del,SMPD1:NM_001007593:exon1:c.108_113del:p.A48_L49del,SMPD1:NM_001318087:exon1:c.108_113del:p.A48_L49del,SMPD1:NM_001365135:exon1:c.108_113del:p.A48_L49del	22	chr11	6390705	TGCTGGC	T	AS_SB_TABLE=4,2|10,6;DP=32;ECNT=1;MBQ=36,36;MFRL=236,203;MMQ=60,60;MPOS=26;PON;POPAF=1.80;RPA=6,5;RU=GCTGGC;STR;TLOD=61.29	GT:AD:AF:DP:F1R2:F2R1:SB	0/1	6	16	0.718	22
Pre-Subject 1	chr11	6546665	6546665	-	TGCCCTACTGCA	DNHD1	In_Frame_Ins	NM_144666	exon21	c.5726_5727insTGCCCTACTGCA	p.L1912_R1913insHALL	INS	exonic	DNHD1	.	nonframeshift insertion	DNHD1:NM_144666:exon21:c.5726_5727insTGCCCTACTGCA:p.L1912_R1913insHALL	62	chr11	6546665	C	CTGCCCTACTGCA	AS_SB_TABLE=0,0|37,25;DP=66;ECNT=1;MBQ=0,36;MFRL=0,180;MMQ=60,60;MPOS=20;PON;POPAF=1.305e-03;TLOD=272.29	GT:AD:AF:DP:F1R2:F2R1:SB	0/1	0	62	0.985	62
Pre-Subject 1	chr11	6558221	6558221	G	A	DNHD1	Missense_Mutation	NM_144666	exon25	c.G8926A	p.D2976N	SNP	exonic	DNHD1	.	nonsynonymous SNV	DNHD1:NM_144666:exon25:c.G8926A:p.D2976N	46	chr11	6558221	G	A	AS_SB_TABLE=21,23|0,2;DP=49;ECNT=1;MBQ=36,36;MFRL=233,219;MMQ=60,60;MPOS=15;POPAF=7.30;TLOD=3.49	GT:AD:AF:DP:F1R2:F2R1:SB	0/1	44	2	0.063	46
Pre-Subject 1	chr11	7691945	7691945	G	A	OVCH2	Silent	NM_198185	exon13	c.C1464T	p.D488D	SNP	exonic	OVCH2	.	synonymous SNV	OVCH2:NM_198185:exon13:c.C1464T:p.D488D	28	chr11	7691945	G	A	AS_SB_TABLE=5,14|2,7;DP=31;ECNT=1;MBQ=36,36;MFRL=200,213;MMQ=60,60;MPOS=19;PON;POPAF=0.983;TLOD=24.79	GT:AD:AF:DP:F1R2:F2R1:SB	0/1	19	9	0.33	28
Pre-Subject 1	chr11	8925736	8925736	G	C	C11orf16	Missense_Mutation	NM_020643	exon5	c.C931G	p.P311A	SNP	exonic	C11orf16	.	nonsynonymous SNV	C11orf16:NM_020643:exon5:c.C931G:p.P311A	53	chr11	8925736	G	C	AS_SB_TABLE=13,16|8,16;DP=56;ECNT=1;MBQ=36,36;MFRL=211,205;MMQ=60,60;MPOS=18;PON;POPAF=0.250;TLOD=73.26	GT:AD:AF:DP:F1R2:F2R1:SB	0/1	29	24	0.444	53
Pre-Subject 1	chr11	8948338	8948338	C	T	TMEM9B	Silent	NM_001286094	exon4	c.G357A	p.R119R	SNP	exonic	TMEM9B	.	synonymous SNV	TMEM9B:NM_001286094:exon4:c.G357A:p.R119R,TMEM9B:NM_001286095:exon5:c.G357A:p.R119R,TMEM9B:NM_020644:exon5:c.G579A:p.R193R	66	chr11	8948338	C	T	AS_SB_TABLE=32,32|2,0;DP=67;ECNT=1;MBQ=36,36;MFRL=217,162;MMQ=60,60;MPOS=26;POPAF=7.30;TLOD=3.08	GT:AD:AF:DP:F1R2:F2R1:SB	0/1	64	2	0.047	66
Pre-Subject 1	chr11	9069437	9069437	T	C	SCUBE2	Silent	NM_001170690	exon5	c.A576G	p.P192P	SNP	exonic	SCUBE2	.	synonymous SNV	SCUBE2:NM_001170690:exon5:c.A576G:p.P192P,SCUBE2:NM_001330199:exon5:c.A576G:p.P192P,SCUBE2:NM_001367977:exon5:c.A576G:p.P192P,SCUBE2:NM_020974:exon5:c.A576G:p.P192P	43	chr11	9069437	T	C	AS_SB_TABLE=16,9|11,7;DP=45;ECNT=1;MBQ=36,36;MFRL=167,193;MMQ=60,60;MPOS=18;POPAF=2.66;TLOD=56.16	GT:AD:AF:DP:F1R2:F2R1:SB	0/1	25	18	0.45	43
Pre-Subject 1	chr11	14967718	14967718	G	A	CALCA	Missense_Mutation	NM_001033953	exon4	c.C364T	p.R122C	SNP	exonic	CALCA	.	nonsynonymous SNV	CALCA:NM_001033953:exon4:c.C364T:p.R122C	40	chr11	14967718	G	A	AS_SB_TABLE=14,4|11,11;DP=42;ECNT=2;MBQ=36,36;MFRL=247,204;MMQ=60,60;MPOS=18;POPAF=4.61;TLOD=65.86	GT:AD:AF:DP:F1R2:F2R1:PGT:PID:PS:SB	0|1	18	22	0.532	40
Pre-Subject 1	chr11	14967742	14967742	C	T	CALCA	Missense_Mutation	NM_001033953	exon4	c.G340A	p.V114M	SNP	exonic	CALCA	.	nonsynonymous SNV	CALCA:NM_001033953:exon4:c.G340A:p.V114M	47	chr11	14967742	C	T	AS_SB_TABLE=33,12|2,0;DP=50;ECNT=2;MBQ=36,34;MFRL=206,161;MMQ=60,60;MPOS=7;POPAF=7.30;TLOD=3.07	GT:AD:AF:DP:F1R2:F2R1:PGT:PID:PS:SB	1|0	45	2	0.063	47
Pre-Subject 1	chr11	15190780	15190780	A	G	INSC	Missense_Mutation	NM_001278313	exon5	c.A659G	p.Q220R	SNP	exonic	INSC	.	nonsynonymous SNV	INSC:NM_001278313:exon5:c.A659G:p.Q220R,INSC:NM_001278315:exon5:c.A659G:p.Q220R,INSC:NM_001278316:exon5:c.A659G:p.Q220R,INSC:NM_001031853:exon6:c.A800G:p.Q267R,INSC:NM_001042536:exon6:c.A659G:p.Q220R,INSC:NM_001278314:exon6:c.A764G:p.Q255R	27	chr11	15190780	A	G	AS_SB_TABLE=2,11|5,9;DP=28;ECNT=1;MBQ=36,36;MFRL=207,182;MMQ=60,60;MPOS=18;POPAF=4.61;TLOD=42.63	GT:AD:AF:DP:F1R2:F2R1:SB	0/1	13	14	0.537	27
Pre-Subject 1	chr11	16855856	16855856	C	G	PLEKHA7	Missense_Mutation	NM_001329630	exon5	c.G364C	p.E122Q	SNP	exonic	PLEKHA7	.	nonsynonymous SNV	PLEKHA7:NM_001329630:exon5:c.G364C:p.E122Q,PLEKHA7:NM_001329631:exon5:c.G364C:p.E122Q,PLEKHA7:NM_175058:exon5:c.G364C:p.E122Q	42	chr11	16855856	C	G	AS_SB_TABLE=18,22|2,0;DP=42;ECNT=1;MBQ=36,36;MFRL=185,231;MMQ=60,60;MPOS=18;POPAF=7.30;TLOD=4.04	GT:AD:AF:DP:F1R2:F2R1:SB	0/1	40	2	0.07	42
Pre-Subject 1	chr11	17504676	17504676	T	C	USH1C	Missense_Mutation	NM_153676	exon20	c.A2155G	p.M719V	SNP	exonic	USH1C	.	nonsynonymous SNV	USH1C:NM_153676:exon20:c.A2155G:p.M719V	52	chr11	17504676	T	C	AS_SB_TABLE=10,17|12,13;DP=54;ECNT=2;MBQ=36,36;MFRL=185,200;MMQ=60,60;MPOS=20;POPAF=7.30;TLOD=75.94	GT:AD:AF:DP:F1R2:F2R1:SB	0/1	27	25	0.478	52
Pre-Subject 1	chr11	17527316	17527316	C	T	USH1C	Missense_Mutation	NM_001297764	exon5	c.G403A	p.V135I	SNP	exonic	USH1C	.	nonsynonymous SNV	USH1C:NM_001297764:exon5:c.G403A:p.V135I,USH1C:NM_005709:exon5:c.G403A:p.V135I,USH1C:NM_153676:exon5:c.G403A:p.V135I	36	chr11	17527316	C	T	AS_SB_TABLE=10,7|6,13;DP=36;ECNT=1;MBQ=36,36;MFRL=176,170;MMQ=60,60;MPOS=7;POPAF=2.64;TLOD=60.70	GT:AD:AF:DP:F1R2:F2R1:SB	0/1	17	19	0.524	36
Pre-Subject 1	chr11	17605996	17605996	G	A	OTOG	Silent	NM_001277269	exon32	c.G4053A	p.G1351G	SNP	exonic	OTOG	.	synonymous SNV	OTOG:NM_001277269:exon32:c.G4053A:p.G1351G,OTOG:NM_001292063:exon33:c.G4017A:p.G1339G	36	chr11	17605996	G	A	AS_SB_TABLE=12,22|0,2;DP=37;ECNT=1;MBQ=36,34;MFRL=201,167;MMQ=60,60;MPOS=6;POPAF=7.30;TLOD=3.38	GT:AD:AF:DP:F1R2:F2R1:SB	0/1	34	2	0.079	36
Pre-Subject 1	chr11	17610353	17610353	A	C	OTOG	Missense_Mutation	NM_001277269	exon35	c.A5089C	p.T1697P	SNP	exonic	OTOG	.	nonsynonymous SNV	OTOG:NM_001277269:exon35:c.A5089C:p.T1697P,OTOG:NM_001292063:exon36:c.A5053C:p.T1685P	22	chr11	17610353	A	C	AS_SB_TABLE=2,17|3,0;DP=23;ECNT=3;MBQ=36,14;MFRL=221,195;MMQ=60,60;MPOS=9;POPAF=7.30;TLOD=4.74	GT:AD:AF:DP:F1R2:F2R1:PGT:PID:PS:SB	0|1	19	3	0.164	22
Pre-Subject 1	chr11	17610364	17610364	G	C	OTOG	Missense_Mutation	NM_001277269	exon35	c.G5100C	p.Q1700H	SNP	exonic	OTOG	.	nonsynonymous SNV	OTOG:NM_001277269:exon35:c.G5100C:p.Q1700H,OTOG:NM_001292063:exon36:c.G5064C:p.Q1688H	23	chr11	17610364	G	C	AS_SB_TABLE=5,16|2,0;DP=23;ECNT=3;MBQ=36,14;MFRL=239,184;MMQ=60,50;MPOS=27;POPAF=7.30;TLOD=3.58	GT:AD:AF:DP:F1R2:F2R1:PGT:PID:PS:SB	0|1	21	2	0.12	23
Pre-Subject 1	chr11	17988678	17988678	G	A	SERGEF	Nonsense_Mutation	NM_012139	exon8	c.C763T	p.Q255X	SNP	exonic	SERGEF	.	stopgain	SERGEF:NM_012139:exon8:c.C763T:p.Q255X	48	chr11	17988678	G	A	AS_SB_TABLE=32,14|1,1;DP=51;ECNT=1;MBQ=36,36;MFRL=203,137;MMQ=60,60;MPOS=22;POPAF=7.30;TLOD=3.41	GT:AD:AF:DP:F1R2:F2R1:SB	0/1	46	2	0.06	48
Pre-Subject 1	chr11	19880086	19880086	G	A	NAV2	Silent	NM_001111018	exon5	c.G537A	p.A179A	SNP	exonic	NAV2	.	synonymous SNV	NAV2:NM_001111018:exon5:c.G537A:p.A179A,NAV2:NM_001244963:exon5:c.G729A:p.A243A,NAV2:NM_145117:exon5:c.G729A:p.A243A,NAV2:NM_182964:exon5:c.G729A:p.A243A	38	chr11	19880086	G	A	AS_SB_TABLE=0,0|18,20;DP=39;ECNT=1;MBQ=0,36;MFRL=0,214;MMQ=60,60;MPOS=22;PON;POPAF=0.407;TLOD=143.14	GT:AD:AF:DP:F1R2:F2R1:SB	0/1	0	38	0.975	38
Pre-Subject 1	chr11	19892566	19892566	A	C	NAV2	Silent	NM_001111018	exon6	c.A711C	p.P237P	SNP	exonic	NAV2	.	synonymous SNV	NAV2:NM_001111018:exon6:c.A711C:p.P237P,NAV2:NM_145117:exon6:c.A903C:p.P301P,NAV2:NM_182964:exon6:c.A903C:p.P301P,NAV2:NM_001244963:exon7:c.A972C:p.P324P	60	chr11	19892566	A	C	AS_SB_TABLE=18,35|7,0;DP=64;ECNT=2;MBQ=36,14;MFRL=185,242;MMQ=60,60;MPOS=25;POPAF=7.30;TLOD=5.73	GT:AD:AF:DP:F1R2:F2R1:SB	0/1	53	7	0.099	60
Pre-Subject 1	chr11	19892572	19892572	A	C	NAV2	Silent	NM_001111018	exon6	c.A717C	p.P239P	SNP	exonic	NAV2	.	synonymous SNV	NAV2:NM_001111018:exon6:c.A717C:p.P239P,NAV2:NM_145117:exon6:c.A909C:p.P303P,NAV2:NM_182964:exon6:c.A909C:p.P303P,NAV2:NM_001244963:exon7:c.A978C:p.P326P	65	chr11	19892572	A	C	AS_SB_TABLE=15,40|10,0;DP=69;ECNT=2;MBQ=36,14;MFRL=193,273;MMQ=60,60;MPOS=26;POPAF=7.30;TLOD=7.06	GT:AD:AF:DP:F1R2:F2R1:SB	0/1	55	10	0.111	65
Pre-Subject 1	chr11	19948744	19948744	G	A	NAV2	Missense_Mutation	NM_001111018	exon10	c.G2117A	p.S706N	SNP	exonic	NAV2	.	nonsynonymous SNV	NAV2:NM_001111018:exon10:c.G2117A:p.S706N,NAV2:NM_145117:exon10:c.G2309A:p.S770N,NAV2:NM_182964:exon10:c.G2309A:p.S770N,NAV2:NM_001244963:exon11:c.G2378A:p.S793N	62	chr11	19948744	G	A	AS_SB_TABLE=37,23|1,1;DP=66;ECNT=1;MBQ=36,36;MFRL=214,160;MMQ=60,60;MPOS=23;POPAF=7.30;TLOD=3.09	GT:AD:AF:DP:F1R2:F2R1:SB	0/1	60	2	0.047	62
Pre-Subject 1	chr11	22625163	22625163	A	C	FANCF	Silent	NM_022725	exon1	c.T648G	p.R216R	SNP	exonic	FANCF	.	synonymous SNV	FANCF:NM_022725:exon1:c.T648G:p.R216R	37	chr11	22625163	A	C	AS_SB_TABLE=19,16|2,0;DP=38;ECNT=1;MBQ=36,14;MFRL=194,170;MMQ=60,60;MPOS=25;POPAF=7.30;TLOD=4.59	GT:AD:AF:DP:F1R2:F2R1:SB	0/1	35	2	0.077	37
Pre-Subject 1	chr11	27368542	27368542	T	C	LGR4	Silent	NM_001346432	exon17	c.A2109G	p.K703K	SNP	exonic	LGR4	.	synonymous SNV	LGR4:NM_001346432:exon17:c.A2109G:p.K703K,LGR4:NM_018490:exon18:c.A2181G:p.K727K	50	chr11	27368542	T	C	AS_SB_TABLE=0,0|30,20;DP=51;ECNT=1;MBQ=0,36;MFRL=0,205;MMQ=60,60;MPOS=16;PON;POPAF=0.00;TLOD=184.48	GT:AD:AF:DP:F1R2:F2R1:SB	0/1	0	50	0.981	50
Pre-Subject 1	chr11	27392495	27392495	G	C	LGR4	Missense_Mutation	NM_001346432	exon2	c.C209G	p.S70C	SNP	exonic	LGR4	.	nonsynonymous SNV	LGR4:NM_001346432:exon2:c.C209G:p.S70C,LGR4:NM_018490:exon3:c.C281G:p.S94C	32	chr11	27392495	G	C	AS_SB_TABLE=11,19|0,2;DP=35;ECNT=5;MBQ=36,14;MFRL=200,212;MMQ=60,60;MPOS=19;POPAF=7.30;TLOD=4.79	GT:AD:AF:DP:F1R2:F2R1:PGT:PID:PS:SB	0|1	30	2	0.089	32
Pre-Subject 1	chr11	27392501	27392501	T	G	LGR4	Missense_Mutation	NM_001346432	exon2	c.A203C	p.D68A	SNP	exonic	LGR4	.	nonsynonymous SNV	LGR4:NM_001346432:exon2:c.A203C:p.D68A,LGR4:NM_018490:exon3:c.A275C:p.D92A	31	chr11	27392501	T	G	AS_SB_TABLE=11,18|0,2;DP=31;ECNT=5;MBQ=36,14;MFRL=204,212;MMQ=60,60;MPOS=25;POPAF=7.30;TLOD=4.84	GT:AD:AF:DP:F1R2:F2R1:PGT:PID:PS:SB	0|1	29	2	0.093	31
Pre-Subject 1	chr11	27392517	27392517	G	T	LGR4	Missense_Mutation	NM_001346432	exon2	c.C187A	p.Q63K	SNP	exonic	LGR4	.	nonsynonymous SNV	LGR4:NM_001346432:exon2:c.C187A:p.Q63K,LGR4:NM_018490:exon3:c.C259A:p.Q87K	27	chr11	27392517	G	T	AS_SB_TABLE=7,17|0,3;DP=27;ECNT=5;MBQ=36,14;MFRL=193,234;MMQ=60,60;MPOS=25;POPAF=7.30;TLOD=5.27	GT:AD:AF:DP:F1R2:F2R1:PGT:PID:PS:SB	0|1	24	3	0.12	27
Pre-Subject 1	chr11	34916384	34916384	G	A	PDHX	Missense_Mutation	NM_001135024	exon1	c.G13A	p.G5S	SNP	exonic	PDHX	.	nonsynonymous SNV	PDHX:NM_001135024:exon1:c.G13A:p.G5S	19	chr11	34916384	G	A	AS_SB_TABLE=4,6|2,7;DP=20;ECNT=1;MBQ=36,36;MFRL=195,193;MMQ=60,60;MPOS=22;PON;POPAF=0.423;TLOD=29.61	GT:AD:AF:DP:F1R2:F2R1:SB	0/1	10	9	0.476	19
Pre-Subject 1	chr11	35434797	35434797	C	T	PAMR1	Silent	NM_001282676	exon8	c.G1008A	p.G336G	SNP	exonic	PAMR1	.	synonymous SNV	PAMR1:NM_001282676:exon8:c.G1008A:p.G336G,PAMR1:NM_001001991:exon10:c.G1341A:p.G447G,PAMR1:NM_015430:exon11:c.G1392A:p.G464G,PAMR1:NM_001282675:exon12:c.G1221A:p.G407G	66	chr11	35434797	C	T	AS_SB_TABLE=8,16|25,17;DP=71;ECNT=1;MBQ=36,36;MFRL=204,215;MMQ=60,60;MPOS=17;POPAF=7.30;TLOD=143.18	GT:AD:AF:DP:F1R2:F2R1:SB	0/1	24	42	0.641	66
Pre-Subject 1	chr11	36574846	36574846	G	A	RAG1	Silent	NM_000448	exon2	c.G1542A	p.L514L	SNP	exonic	RAG1	.	synonymous SNV	RAG1:NM_000448:exon2:c.G1542A:p.L514L	48	chr11	36574846	G	A	AS_SB_TABLE=29,17|2,0;DP=51;ECNT=1;MBQ=36,36;MFRL=237,180;MMQ=60,60;MPOS=25;POPAF=4.31;TLOD=3.40	GT:AD:AF:DP:F1R2:F2R1:SB	0/1	46	2	0.06	48
Pre-Subject 1	chr11	44232440	44232440	T	G	EXT2	Missense_Mutation	NM_000401	exon11	c.T1849G	p.S617A	SNP	exonic	EXT2	.	nonsynonymous SNV	EXT2:NM_000401:exon11:c.T1849G:p.S617A,EXT2:NM_207122:exon11:c.T1750G:p.S584A,EXT2:NM_001178083:exon12:c.T1780G:p.S594A	47	chr11	44232440	T	G	AS_SB_TABLE=29,15|0,3;DP=49;ECNT=1;MBQ=36,36;MFRL=186,278;MMQ=60,60;MPOS=1;POPAF=7.30;TLOD=3.34	GT:AD:AF:DP:F1R2:F2R1:SB	0/1	44	3	0.07	47
Pre-Subject 1	chr11	45928818	45928818	G	C	LARGE2	Missense_Mutation	NM_001300721	exon14	c.G2139C	p.Q713H	SNP	exonic	LARGE2	.	nonsynonymous SNV	LARGE2:NM_001300721:exon14:c.G2139C:p.Q713H,LARGE2:NM_152312:exon14:c.G2139C:p.Q713H,LARGE2:NM_001300722:exon15:c.G2046C:p.Q682H	60	chr11	45928818	G	C	AS_SB_TABLE=16,42|0,2;DP=62;ECNT=1;MBQ=36,36;MFRL=196,205;MMQ=60,60;MPOS=28;POPAF=7.30;TLOD=3.14	GT:AD:AF:DP:F1R2:F2R1:SB	0/1	58	2	0.049	60
Pre-Subject 1	chr11	45935739	45935739	G	T	PHF21A	Missense_Mutation	NM_001101802	exon17	c.C1682A	p.A561E	SNP	exonic	PHF21A	.	nonsynonymous SNV	PHF21A:NM_001101802:exon17:c.C1682A:p.A561E,PHF21A:NM_001352026:exon17:c.C1685A:p.A562E,PHF21A:NM_001352030:exon17:c.C1541A:p.A514E,PHF21A:NM_001352031:exon17:c.C1541A:p.A514E,PHF21A:NM_016621:exon17:c.C1544A:p.A515E,PHF21A:NM_001352025:exon18:c.C1685A:p.A562E,PHF21A:NM_001352027:exon18:c.C1685A:p.A562E,PHF21A:NM_001352028:exon18:c.C1544A:p.A515E,PHF21A:NM_001352032:exon19:c.C1541A:p.A514E,PHF21A…	13	chr11	45935739	G	T	AS_SB_TABLE=0,6|0,7;DP=15;ECNT=2;MBQ=32,14;MFRL=203,310;MMQ=60,60;MPOS=3;POPAF=3.30;TLOD=10.32	GT:AD:AF:DP:F1R2:F2R1:SB	0/1	6	7	0.514	13
Pre-Subject 1	chr11	46307928	46307928	T	G	CREB3L1	Silent	NM_052854	exon3	c.T444G	p.A148A	SNP	exonic	CREB3L1	.	synonymous SNV	CREB3L1:NM_052854:exon3:c.T444G:p.A148A	12	chr11	46307928	T	G	AS_SB_TABLE=2,8|1,1;DP=12;ECNT=1;MBQ=32,18;MFRL=184,179;MMQ=60,60;MPOS=12;POPAF=7.30;TLOD=3.46	GT:AD:AF:DP:F1R2:F2R1:SB	0/1	10	2	0.207	12
Pre-Subject 1	chr11	46397603	46397603	C	A	AMBRA1	Silent	NM_001300731	exon17	c.G3564T	p.L1188L	SNP	exonic	AMBRA1	.	synonymous SNV	AMBRA1:NM_001300731:exon17:c.G3564T:p.L1188L,AMBRA1:NM_001367469:exon17:c.G3207T:p.L1069L,AMBRA1:NM_001267783:exon18:c.G3387T:p.L1129L,AMBRA1:NM_001367468:exon18:c.G3744T:p.L1248L,AMBRA1:NM_001367470:exon19:c.G2937T:p.L979L,AMBRA1:NM_001367471:exon19:c.G3474T:p.L1158L,AMBRA1:NM_017749:exon19:c.G3474T:p.L1158L,AMBRA1:NM_001267782:exon20:c.G3753T:p.L1251L	38	chr11	46397603	C	A	AS_SB_TABLE=12,9|8,9;DP=38;ECNT=1;MBQ=36,32;MFRL=218,166;MMQ=60,60;MPOS=21;POPAF=2.84;TLOD=47.39	GT:AD:AF:DP:F1R2:F2R1:SB	0/1	21	17	0.417	38
Pre-Subject 1	chr11	46703167	46703178	AGTGGTGACAGA	-	ZNF408	In_Frame_Del	NM_001184751	exon4	c.552_563del	p.V186_V189del	DEL	exonic	ZNF408	.	nonframeshift deletion	ZNF408:NM_001184751:exon4:c.552_563del:p.V186_V189del,ZNF408:NM_024741:exon4:c.576_587del:p.V194_V197del	44	chr11	46703166	CAGTGGTGACAGA	C	AS_SB_TABLE=12,12|11,9;DP=48;ECNT=1;MBQ=36,36;MFRL=248,243;MMQ=60,60;MPOS=27;PON;POPAF=0.824;TLOD=75.13	GT:AD:AF:DP:F1R2:F2R1:SB	0/1	24	20	0.451	44
Pre-Subject 1	chr11	46890460	46890460	G	A	LRP4	Missense_Mutation	NM_002334	exon14	c.C1732T	p.R578C	SNP	exonic	LRP4	.	nonsynonymous SNV	LRP4:NM_002334:exon14:c.C1732T:p.R578C	35	chr11	46890460	G	A	AS_SB_TABLE=8,7|12,8;DP=37;ECNT=1;MBQ=36,36;MFRL=234,203;MMQ=60,60;MPOS=20;POPAF=4.31;TLOD=68.90	GT:AD:AF:DP:F1R2:F2R1:SB	0/1	15	20	0.583	35
Pre-Subject 1	chr11	47360040	47360040	T	G	SPI1	Missense_Mutation	NM_001080547	exon3	c.A146C	p.D49A	SNP	exonic	SPI1	.	nonsynonymous SNV	SPI1:NM_001080547:exon3:c.A146C:p.D49A,SPI1:NM_003120:exon3:c.A143C:p.D48A	27	chr11	47360040	T	G	AS_SB_TABLE=13,8|0,6;DP=31;ECNT=1;MBQ=36,14;MFRL=196,241;MMQ=60,60;MPOS=25;POPAF=7.30;TLOD=3.11	GT:AD:AF:DP:F1R2:F2R1:SB	0/1	21	6	0.173	27
Pre-Subject 1	chr11	47441664	47441664	G	A	RAPSN	Nonsense_Mutation	NM_005055	exon5	c.C859T	p.Q287X	SNP	exonic	RAPSN	.	stopgain	RAPSN:NM_005055:exon5:c.C859T:p.Q287X	55	chr11	47441664	G	A	AS_SB_TABLE=13,40|1,1;DP=60;ECNT=1;MBQ=36,36;MFRL=197,269;MMQ=60,60;MPOS=23;POPAF=7.30;TLOD=3.27	GT:AD:AF:DP:F1R2:F2R1:SB	0/1	53	2	0.054	55
Pre-Subject 1	chr11	47618877	47618877	G	C	MTCH2	Missense_Mutation	NM_001317232	exon12	c.C841G	p.P281A	SNP	exonic	MTCH2	.	nonsynonymous SNV	MTCH2:NM_001317232:exon12:c.C841G:p.P281A,MTCH2:NM_001317233:exon12:c.C424G:p.P142A,MTCH2:NM_014342:exon13:c.C868G:p.P290A	47	chr11	47618877	G	C	AS_SB_TABLE=0,0|23,24;DP=51;ECNT=1;MBQ=0,36;MFRL=0,244;MMQ=60,60;MPOS=21;PON;POPAF=0.539;TLOD=185.39	GT:AD:AF:DP:F1R2:F2R1:SB	0/1	0	47	0.98	47
Pre-Subject 1	chr11	47638735	47638735	T	C	MTCH2	Silent	NM_001317232	exon3	c.A243G	p.G81G	SNP	exonic	MTCH2	.	synonymous SNV	MTCH2:NM_001317232:exon3:c.A243G:p.G81G,MTCH2:NM_014342:exon3:c.A243G:p.G81G	58	chr11	47638735	T	C	AS_SB_TABLE=36,17|5,0;DP=59;ECNT=3;MBQ=36,36;MFRL=178,330;MMQ=60,60;MPOS=27;PON;POPAF=0.959;TLOD=14.20	GT:AD:AF:DP:F1R2:F2R1:PGT:PID:PS:SB	0|1	53	5	0.105	58
Pre-Subject 1	chr11	47638749	47638749	T	A	MTCH2	Nonsense_Mutation	NM_001317232	exon3	c.A229T	p.R77X	SNP	exonic	MTCH2	.	stopgain	MTCH2:NM_001317232:exon3:c.A229T:p.R77X,MTCH2:NM_014342:exon3:c.A229T:p.R77X	59	chr11	47638749	T	A	AS_SB_TABLE=36,18|5,0;DP=61;ECNT=3;MBQ=36,36;MFRL=178,330;MMQ=60,60;MPOS=16;PON;POPAF=0.979;TLOD=14.02	GT:AD:AF:DP:F1R2:F2R1:PGT:PID:PS:SB	0|1	54	5	0.098	59
Pre-Subject 1	chr11	47710451	47710451	T	C	AGBL2	Missense_Mutation	NM_024783	exon4	c.A158G	p.Q53R	SNP	exonic	AGBL2	.	nonsynonymous SNV	AGBL2:NM_024783:exon4:c.A158G:p.Q53R	54	chr11	47710451	T	C	AS_SB_TABLE=27,25|0,2;DP=55;ECNT=1;MBQ=36,36;MFRL=189,271;MMQ=60,60;MPOS=34;POPAF=7.30;TLOD=3.73	GT:AD:AF:DP:F1R2:F2R1:SB	0/1	52	2	0.055	54
Pre-Subject 1	chr11	48264430	48264432	CTT	-	OR4X1	In_Frame_Del	NM_001004726	exon1	c.570_572del	p.F192del	DEL	exonic	OR4X1	.	nonframeshift deletion	OR4X1:NM_001004726:exon1:c.570_572del:p.F192del	91	chr11	48264429	CCTT	C	AS_SB_TABLE=0,0|50,41;DP=95;ECNT=1;MBQ=0,36;MFRL=0,210;MMQ=60,60;MPOS=21;PON;POPAF=0.151;RPA=2,1;RU=CTT;STR;TLOD=396.71	GT:AD:AF:DP:F1R2:F2R1:SB	0/1	0	91	0.989	91
Pre-Subject 1	chr11	48264679	48264679	T	A	OR4X1	Nonsense_Mutation	NM_001004726	exon1	c.T819A	p.Y273X	SNP	exonic	OR4X1	.	stopgain	OR4X1:NM_001004726:exon1:c.T819A:p.Y273X	68	chr11	48264679	T	A	AS_SB_TABLE=0,0|21,47;DP=71;ECNT=3;MBQ=0,36;MFRL=0,206;MMQ=60,60;MPOS=21;PON;POPAF=0.151;TLOD=283.79	GT:AD:AF:DP:F1R2:F2R1:SB	0/1	0	68	0.986	68
Pre-Subject 1	chr11	48264682	48264682	A	G	OR4X1	Silent	NM_001004726	exon1	c.A822G	p.T274T	SNP	exonic	OR4X1	.	synonymous SNV	OR4X1:NM_001004726:exon1:c.A822G:p.T274T	68	chr11	48264682	A	G	AS_SB_TABLE=14,24|7,23;DP=70;ECNT=3;MBQ=36,36;MFRL=208,196;MMQ=60,60;MPOS=17;PON;POPAF=1.35;TLOD=93.41	GT:AD:AF:DP:F1R2:F2R1:SB	0/1	38	30	0.443	68
Pre-Subject 1	chr11	48264704	48264704	C	T	OR4X1	Missense_Mutation	NM_001004726	exon1	c.C844T	p.P282S	SNP	exonic	OR4X1	.	nonsynonymous SNV	OR4X1:NM_001004726:exon1:c.C844T:p.P282S	66	chr11	48264704	C	T	AS_SB_TABLE=0,0|18,48;DP=73;ECNT=3;MBQ=0,36;MFRL=0,202;MMQ=60,60;MPOS=20;PON;POPAF=0.316;TLOD=255.31	GT:AD:AF:DP:F1R2:F2R1:SB	0/1	0	66	0.986	66
Pre-Subject 1	chr11	48489636	48489636	C	A	OR4A47	Missense_Mutation	NM_001005512	exon1	c.C844A	p.P282T	SNP	exonic	OR4A47	.	nonsynonymous SNV	OR4A47:NM_001005512:exon1:c.C844A:p.P282T	79	chr11	48489636	C	A	AS_SB_TABLE=38,31|0,10;DP=82;ECNT=2;MBQ=36,14;MFRL=201,217;MMQ=49,43;MPOS=12;POPAF=7.30;TLOD=10.95	GT:AD:AF:DP:F1R2:F2R1:SB	0/1	69	10	0.116	79
Pre-Subject 1	chr11	48489641	48489641	A	T	OR4A47	Missense_Mutation	NM_001005512	exon1	c.A849T	p.L283F	SNP	exonic	OR4A47	.	nonsynonymous SNV	OR4A47:NM_001005512:exon1:c.A849T:p.L283F	73	chr11	48489641	A	T	AS_SB_TABLE=34,32|0,7;DP=78;ECNT=2;MBQ=36,14;MFRL=203,216;MMQ=49,40;MPOS=14;POPAF=7.30;TLOD=4.43	GT:AD:AF:DP:F1R2:F2R1:SB	0/1	66	7	0.075	73
Pre-Subject 1	chr11	55812279	55812279	C	T	OR5L1	Silent	NM_001004738	exon1	c.C813T	p.D271D	SNP	exonic	OR5L1	.	synonymous SNV	OR5L1:NM_001004738:exon1:c.C813T:p.D271D	61	chr11	55812279	C	T	AS_SB_TABLE=24,33|0,4;DP=61;ECNT=3;MBQ=36,21;MFRL=203,150;MMQ=60,60;MPOS=13;POPAF=7.30;TLOD=7.13	GT:AD:AF:DP:F1R2:F2R1:PGT:PID:PS:SB	0|1	57	4	0.063	61
Pre-Subject 1	chr11	55812282	55812282	A	T	OR5L1	Missense_Mutation	NM_001004738	exon1	c.A816T	p.K272N	SNP	exonic	OR5L1	.	nonsynonymous SNV	OR5L1:NM_001004738:exon1:c.A816T:p.K272N	60	chr11	55812282	A	T	AS_SB_TABLE=23,33|0,4;DP=60;ECNT=3;MBQ=36,23;MFRL=206,150;MMQ=60,60;MPOS=16;POPAF=7.30;TLOD=7.10	GT:AD:AF:DP:F1R2:F2R1:PGT:PID:PS:SB	0|1	56	4	0.062	60
Pre-Subject 1	chr11	55812286	55812286	G	T	OR5L1	Missense_Mutation	NM_001004738	exon1	c.G820T	p.A274S	SNP	exonic	OR5L1	.	nonsynonymous SNV	OR5L1:NM_001004738:exon1:c.G820T:p.A274S	58	chr11	55812286	G	T	AS_SB_TABLE=24,30|0,4;DP=58;ECNT=3;MBQ=36,23;MFRL=210,150;MMQ=60,60;MPOS=18;POPAF=7.30;TLOD=7.19	GT:AD:AF:DP:F1R2:F2R1:PGT:PID:PS:SB	0|1	54	4	0.065	58
Pre-Subject 1	chr11	55828026	55828026	G	T	OR5L2	Missense_Mutation	NM_001004739	exon1	c.G808T	p.V270F	SNP	exonic	OR5L2	.	nonsynonymous SNV	OR5L2:NM_001004739:exon1:c.G808T:p.V270F	62	chr11	55828026	G	T	AS_SB_TABLE=38,22|0,2;DP=62;ECNT=4;MBQ=36,30;MFRL=201,193;MMQ=60,60;MPOS=26;POPAF=2.11;TLOD=6.08	GT:AD:AF:DP:F1R2:F2R1:PGT:PID:PS:SB	0|1	60	2	0.06	62
Pre-Subject 1	chr11	55828031	55828031	C	T	OR5L2	Silent	NM_001004739	exon1	c.C813T	p.D271D	SNP	exonic	OR5L2	.	synonymous SNV	OR5L2:NM_001004739:exon1:c.C813T:p.D271D	66	chr11	55828031	C	T	AS_SB_TABLE=43,18|0,5;DP=66;ECNT=4;MBQ=36,36;MFRL=188,183;MMQ=60,60;MPOS=26;POPAF=7.30;TLOD=8.02	GT:AD:AF:DP:F1R2:F2R1:PGT:PID:PS:SB	0|1	61	5	0.075	66
Pre-Subject 1	chr11	55828034	55828034	A	T	OR5L2	Missense_Mutation	NM_001004739	exon1	c.A816T	p.K272N	SNP	exonic	OR5L2	.	nonsynonymous SNV	OR5L2:NM_001004739:exon1:c.A816T:p.K272N	65	chr11	55828034	A	T	AS_SB_TABLE=43,17|0,5;DP=65;ECNT=4;MBQ=36,27;MFRL=190,183;MMQ=60,60;MPOS=2;POPAF=7.30;TLOD=8.05	GT:AD:AF:DP:F1R2:F2R1:PGT:PID:PS:SB	0|1	60	5	0.076	65
Pre-Subject 1	chr11	55828038	55828038	G	T	OR5L2	Missense_Mutation	NM_001004739	exon1	c.G820T	p.A274S	SNP	exonic	OR5L2	.	nonsynonymous SNV	OR5L2:NM_001004739:exon1:c.G820T:p.A274S	65	chr11	55828038	G	T	AS_SB_TABLE=43,15|0,7;DP=70;ECNT=4;MBQ=36,14;MFRL=190,144;MMQ=60,60;MPOS=5;POPAF=7.30;TLOD=10.48	GT:AD:AF:DP:F1R2:F2R1:SB	0/1	58	7	0.08	65
Pre-Subject 1	chr11	55936044	55936044	G	A	OR5I1	Silent	NM_006637	exon1	c.C357T	p.A119A	SNP	exonic	OR5I1	.	synonymous SNV	OR5I1:NM_006637:exon1:c.C357T:p.A119A	54	chr11	55936044	G	A	AS_SB_TABLE=21,31|1,1;DP=54;ECNT=1;MBQ=36,36;MFRL=227,264;MMQ=60,60;MPOS=28;POPAF=7.30;TLOD=3.26	GT:AD:AF:DP:F1R2:F2R1:SB	0/1	52	2	0.054	54
Pre-Subject 1	chr11	56105892	56105892	G	A	OR8H2	Missense_Mutation	NM_001005200	exon1	c.G850A	p.V284M	SNP	exonic	OR8H2	.	nonsynonymous SNV	OR8H2:NM_001005200:exon1:c.G850A:p.V284M	42	chr11	56105892	G	A	AS_SB_TABLE=0,0|30,12;DP=42;ECNT=1;MBQ=0,36;MFRL=0,192;MMQ=60,48;MPOS=20;PON;POPAF=4.345e-04;TLOD=158.15	GT:AD:AF:DP:F1R2:F2R1:SB	0/1	0	42	0.977	42
Pre-Subject 1	chr11	57704047	57704049	GCT	-	MED19	In_Frame_Del	NM_001317078	exon5	c.775_777del	p.S259del	DEL	exonic	MED19	.	nonframeshift deletion	MED19:NM_001317078:exon5:c.775_777del:p.S259del	15	chr11	57704046	GGCT	G	AS_SB_TABLE=10,3|1,1;DP=17;ECNT=1;MBQ=36,34;MFRL=249,210;MMQ=60,60;MPOS=28;POPAF=3.61;RPA=5,4;RU=GCT;STR;TLOD=5.72	GT:AD:AF:DP:F1R2:F2R1:SB	0/1	13	2	0.172	15
Pre-Subject 1	chr11	58203801	58203801	A	G	OR1S2	Silent	NM_001004459	exon1	c.T381C	p.L127L	SNP	exonic	OR1S2	.	synonymous SNV	OR1S2:NM_001004459:exon1:c.T381C:p.L127L	71	chr11	58203801	A	G	AS_SB_TABLE=21,47|0,3;DP=76;ECNT=1;MBQ=36,36;MFRL=213,288;MMQ=60,27;MPOS=11;POPAF=3.53;TLOD=3.84	GT:AD:AF:DP:F1R2:F2R1:SB	0/1	68	3	0.055	71
Pre-Subject 1	chr11	59182092	59182092	T	G	DTX4	Missense_Mutation	NM_001300727	exon2	c.T247G	p.C83G	SNP	exonic	DTX4	.	nonsynonymous SNV	DTX4:NM_001300727:exon2:c.T247G:p.C83G,DTX4:NM_015177:exon2:c.T565G:p.C189G	64	chr11	59182092	T	G	AS_SB_TABLE=21,31|12,0;DP=68;ECNT=1;MBQ=36,14;MFRL=208,196;MMQ=60,60;MPOS=13;POPAF=7.30;TLOD=7.41	GT:AD:AF:DP:F1R2:F2R1:SB	0/1	52	12	0.166	64
Pre-Subject 1	chr11	59195317	59195317	A	C	DTX4	Missense_Mutation	NM_001300727	exon7	c.A1166C	p.H389P	SNP	exonic	DTX4	.	nonsynonymous SNV	DTX4:NM_001300727:exon7:c.A1166C:p.H389P,DTX4:NM_015177:exon7:c.A1484C:p.H495P	37	chr11	59195317	A	C	AS_SB_TABLE=20,13|4,0;DP=38;ECNT=1;MBQ=36,14;MFRL=184,193;MMQ=60,60;MPOS=16;POPAF=7.30;TLOD=3.46	GT:AD:AF:DP:F1R2:F2R1:SB	0/1	33	4	0.102	37
Pre-Subject 1	chr11	59212403	59212403	G	C	MPEG1	Missense_Mutation	NM_001039396	exon1	c.C463G	p.L155V	SNP	exonic	MPEG1	.	nonsynonymous SNV	MPEG1:NM_001039396:exon1:c.C463G:p.L155V	27	chr11	59212403	G	C	AS_SB_TABLE=7,10|10,0;DP=28;ECNT=4;MBQ=36,32;MFRL=193,188;MMQ=51,40;MPOS=33;POPAF=7.30;TLOD=32.69	GT:AD:AF:DP:F1R2:F2R1:PGT:PID:PS:SB	0|1	17	10	0.37	27
Pre-Subject 1	chr11	59212410	59212410	T	A	MPEG1	Silent	NM_001039396	exon1	c.A456T	p.V152V	SNP	exonic	MPEG1	.	synonymous SNV	MPEG1:NM_001039396:exon1:c.A456T:p.V152V	31	chr11	59212410	T	A	AS_SB_TABLE=10,13|8,0;DP=31;ECNT=4;MBQ=36,14;MFRL=193,193;MMQ=60,40;MPOS=29;POPAF=7.30;TLOD=23.58	GT:AD:AF:DP:F1R2:F2R1:PGT:PID:PS:SB	0|1	23	8	0.243	31
Pre-Subject 1	chr11	59212415	59212415	G	T	MPEG1	Missense_Mutation	NM_001039396	exon1	c.C451A	p.Q151K	SNP	exonic	MPEG1	.	nonsynonymous SNV	MPEG1:NM_001039396:exon1:c.C451A:p.Q151K	36	chr11	59212415	G	T	AS_SB_TABLE=14,15|7,0;DP=36;ECNT=4;MBQ=36,14;MFRL=188,187;MMQ=60,40;MPOS=28;POPAF=7.30;TLOD=4.94	GT:AD:AF:DP:F1R2:F2R1:PGT:PID:PS:SB	0|1	29	7	0.161	36
Pre-Subject 1	chr11	59515353	59515353	T	G	OR4D9	Silent	NM_001004711	exon1	c.T441G	p.A147A	SNP	exonic	OR4D9	.	synonymous SNV	OR4D9:NM_001004711:exon1:c.T441G:p.A147A	62	chr11	59515353	T	G	AS_SB_TABLE=29,29|0,4;DP=64;ECNT=2;MBQ=32,14;MFRL=230,236;MMQ=60,60;MPOS=27;POPAF=7.30;TLOD=4.87	GT:AD:AF:DP:F1R2:F2R1:SB	0/1	58	4	0.069	62
Pre-Subject 1	chr11	59515361	59515361	T	G	OR4D9	Missense_Mutation	NM_001004711	exon1	c.T449G	p.V150G	SNP	exonic	OR4D9	.	nonsynonymous SNV	OR4D9:NM_001004711:exon1:c.T449G:p.V150G	59	chr11	59515361	T	G	AS_SB_TABLE=25,24|1,9;DP=60;ECNT=2;MBQ=32,14;MFRL=235,177;MMQ=60,60;MPOS=24;POPAF=7.30;TLOD=3.07	GT:AD:AF:DP:F1R2:F2R1:SB	0/1	49	10	0.126	59
Pre-Subject 1	chr11	59713478	59713478	T	C	OR10V1	Missense_Mutation	NM_001005324	exon1	c.A368G	p.Q123R	SNP	exonic	OR10V1	.	nonsynonymous SNV	OR10V1:NM_001005324:exon1:c.A368G:p.Q123R	55	chr11	59713478	T	C	AS_SB_TABLE=15,18|13,9;DP=57;ECNT=1;MBQ=36,36;MFRL=204,205;MMQ=60,60;MPOS=21;PON;POPAF=0.030;TLOD=62.72	GT:AD:AF:DP:F1R2:F2R1:SB	0/1	33	22	0.405	55
Pre-Subject 1	chr11	60040487	60040487	G	T	OOSP2	Missense_Mutation	NM_173801	exon1	c.G28T	p.A10S	SNP	exonic	OOSP2	.	nonsynonymous SNV	OOSP2:NM_173801:exon1:c.G28T:p.A10S	43	chr11	60040487	G	T	AS_SB_TABLE=23,18|2,0;DP=45;ECNT=1;MBQ=36,25;MFRL=168,225;MMQ=60,60;MPOS=14;POPAF=7.30;TLOD=4.03	GT:AD:AF:DP:F1R2:F2R1:SB	0/1	41	2	0.069	43
Pre-Subject 1	chr11	60930548	60930548	G	C	TMEM132A	Missense_Mutation	NM_017870	exon5	c.G905C	p.R302P	SNP	exonic	TMEM132A	.	nonsynonymous SNV	TMEM132A:NM_017870:exon5:c.G905C:p.R302P,TMEM132A:NM_178031:exon5:c.G905C:p.R302P	33	chr11	60930548	G	C	AS_SB_TABLE=5,25|3,0;DP=35;ECNT=4;MBQ=36,14;MFRL=195,205;MMQ=60,60;MPOS=9;POPAF=7.30;TLOD=4.75	GT:AD:AF:DP:F1R2:F2R1:PGT:PID:PS:SB	0|1	30	3	0.086	33
Pre-Subject 1	chr11	60930557	60930557	A	C	TMEM132A	Missense_Mutation	NM_017870	exon5	c.A914C	p.Q305P	SNP	exonic	TMEM132A	.	nonsynonymous SNV	TMEM132A:NM_017870:exon5:c.A914C:p.Q305P,TMEM132A:NM_178031:exon5:c.A914C:p.Q305P	34	chr11	60930557	A	C	AS_SB_TABLE=5,26|3,0;DP=34;ECNT=4;MBQ=36,29;MFRL=194,205;MMQ=60,60;MPOS=7;POPAF=7.30;TLOD=4.76	GT:AD:AF:DP:F1R2:F2R1:PGT:PID:PS:SB	0|1	31	3	0.087	34
Pre-Subject 1	chr11	60930582	60930582	G	A	TMEM132A	Silent	NM_017870	exon5	c.G939A	p.L313L	SNP	exonic	TMEM132A	.	synonymous SNV	TMEM132A:NM_017870:exon5:c.G939A:p.L313L,TMEM132A:NM_178031:exon5:c.G939A:p.L313L	30	chr11	60930582	G	A	AS_SB_TABLE=3,16|1,10;DP=31;ECNT=4;MBQ=36,36;MFRL=196,204;MMQ=60,60;MPOS=28;PON;POPAF=0.481;TLOD=35.16	GT:AD:AF:DP:F1R2:F2R1:SB	0/1	19	11	0.383	30
Pre-Subject 1	chr11	61281829	61281829	G	A	VWCE	Silent	NM_152718	exon7	c.C744T	p.C248C	SNP	exonic	VWCE	.	synonymous SNV	VWCE:NM_152718:exon7:c.C744T:p.C248C	32	chr11	61281829	G	A	AS_SB_TABLE=26,4|2,0;DP=35;ECNT=1;MBQ=36,34;MFRL=176,114;MMQ=60,60;MPOS=7;POPAF=7.30;TLOD=3.57	GT:AD:AF:DP:F1R2:F2R1:SB	0/1	30	2	0.09	32
Pre-Subject 1	chr11	61338026	61338026	T	C	TKFC	Missense_Mutation	NM_001351977	exon3	c.T89C	p.L30P	SNP	exonic	TKFC	.	nonsynonymous SNV	TKFC:NM_001351977:exon3:c.T89C:p.L30P,TKFC:NM_001351978:exon3:c.T89C:p.L30P,TKFC:NM_001351979:exon3:c.T89C:p.L30P,TKFC:NM_015533:exon3:c.T89C:p.L30P,TKFC:NM_001351976:exon4:c.T89C:p.L30P	47	chr11	61338026	T	C	AS_SB_TABLE=15,30|0,2;DP=49;ECNT=1;MBQ=36,36;MFRL=180,176;MMQ=60,60;MPOS=33;POPAF=7.30;TLOD=3.43	GT:AD:AF:DP:F1R2:F2R1:SB	0/1	45	2	0.061	47
Pre-Subject 1	chr11	61771548	61771548	C	G	MYRF	Silent	NM_001127392	exon6	c.C789G	p.P263P	SNP	exonic	MYRF	.	synonymous SNV	MYRF:NM_001127392:exon6:c.C789G:p.P263P,MYRF:NM_013279:exon6:c.C762G:p.P254P	23	chr11	61771548	C	G	AS_SB_TABLE=11,5|6,1;DP=23;ECNT=2;MBQ=36,36;MFRL=167,211;MMQ=60,60;MPOS=24;PON;POPAF=0.740;TLOD=20.30	GT:AD:AF:DP:F1R2:F2R1:SB	0/1	16	7	0.333	23
Pre-Subject 1	chr11	61771549	61771549	A	C	MYRF	Missense_Mutation	NM_001127392	exon6	c.A790C	p.S264R	SNP	exonic	MYRF	.	nonsynonymous SNV	MYRF:NM_001127392:exon6:c.A790C:p.S264R,MYRF:NM_013279:exon6:c.A763C:p.S255R	22	chr11	61771549	A	C	AS_SB_TABLE=12,5|5,0;DP=23;ECNT=2;MBQ=32,14;MFRL=184,168;MMQ=60,60;MPOS=21;POPAF=7.30;TLOD=3.19	GT:AD:AF:DP:F1R2:F2R1:SB	0/1	17	5	0.202	22
Pre-Subject 1	chr11	61771831	61771831	C	G	MYRF	Missense_Mutation	NM_001127392	exon7	c.C994G	p.L332V	SNP	exonic	MYRF	.	nonsynonymous SNV	MYRF:NM_001127392:exon7:c.C994G:p.L332V,MYRF:NM_013279:exon7:c.C967G:p.L323V	46	chr11	61771831	C	G	AS_SB_TABLE=10,11|10,15;DP=50;ECNT=1;MBQ=36,36;MFRL=205,202;MMQ=60,60;MPOS=14;POPAF=7.30;TLOD=85.06	GT:AD:AF:DP:F1R2:F2R1:SB	0/1	21	25	0.553	46
Pre-Subject 1	chr11	61779385	61779385	C	T	MYRF	Silent	NM_001127392	exon15	c.C2136T	p.L712L	SNP	exonic	MYRF	.	synonymous SNV	MYRF:NM_001127392:exon15:c.C2136T:p.L712L,MYRF:NM_013279:exon15:c.C2109T:p.L703L	33	chr11	61779385	C	T	AS_SB_TABLE=11,11|3,8;DP=34;ECNT=1;MBQ=36,36;MFRL=231,193;MMQ=60,60;MPOS=14;POPAF=4.31;TLOD=33.17	GT:AD:AF:DP:F1R2:F2R1:SB	0/1	22	11	0.343	33
Pre-Subject 1	chr11	62519080	62519080	G	C	AHNAK	Missense_Mutation	NM_001346445	exon5	c.C15337G	p.L5113V	SNP	exonic	AHNAK	.	nonsynonymous SNV	AHNAK:NM_001346445:exon5:c.C15337G:p.L5113V,AHNAK:NM_001346446:exon5:c.C15337G:p.L5113V,AHNAK:NM_001620:exon5:c.C15337G:p.L5113V	41	chr11	62519080	G	C	AS_SB_TABLE=8,6|14,13;DP=43;ECNT=1;MBQ=36,36;MFRL=184,212;MMQ=60,60;MPOS=28;POPAF=7.30;TLOD=93.57	GT:AD:AF:DP:F1R2:F2R1:SB	0/1	14	27	0.667	41
Pre-Subject 1	chr11	62521355	62521355	A	G	AHNAK	Silent	NM_001346445	exon5	c.T13062C	p.I4354I	SNP	exonic	AHNAK	.	synonymous SNV	AHNAK:NM_001346445:exon5:c.T13062C:p.I4354I,AHNAK:NM_001346446:exon5:c.T13062C:p.I4354I,AHNAK:NM_001620:exon5:c.T13062C:p.I4354I	126	chr11	62521355	A	G	AS_SB_TABLE=47,75|2,2;DP=130;ECNT=1;MBQ=36,32;MFRL=198,123;MMQ=60,60;MPOS=19;POPAF=7.30;TLOD=4.10	GT:AD:AF:DP:F1R2:F2R1:SB	0/1	122	4	0.04	126
Pre-Subject 1	chr11	62522323	62522323	C	A	AHNAK	Missense_Mutation	NM_001346445	exon5	c.G12094T	p.A4032S	SNP	exonic	AHNAK	.	nonsynonymous SNV	AHNAK:NM_001346445:exon5:c.G12094T:p.A4032S,AHNAK:NM_001346446:exon5:c.G12094T:p.A4032S,AHNAK:NM_001620:exon5:c.G12094T:p.A4032S	167	chr11	62522323	C	A	AS_SB_TABLE=24,43|37,63;DP=177;ECNT=1;MBQ=36,36;MFRL=174,196;MMQ=60,60;MPOS=17;POPAF=7.30;TLOD=314.20	GT:AD:AF:DP:F1R2:F2R1:SB	0/1	67	100	0.589	167
Pre-Subject 1	chr11	62527843	62527843	T	G	AHNAK	Missense_Mutation	NM_001346445	exon5	c.A6574C	p.N2192H	SNP	exonic	AHNAK	.	nonsynonymous SNV	AHNAK:NM_001346445:exon5:c.A6574C:p.N2192H,AHNAK:NM_001346446:exon5:c.A6574C:p.N2192H,AHNAK:NM_001620:exon5:c.A6574C:p.N2192H	186	chr11	62527843	T	G	AS_SB_TABLE=86,93|1,6;DP=190;ECNT=2;MBQ=36,36;MFRL=186,111;MMQ=60,40;MPOS=15;POPAF=2.57;TLOD=13.26	GT:AD:AF:DP:F1R2:F2R1:PGT:PID:PS:SB	0|1	179	7	0.039	186
Pre-Subject 1	chr11	62527849	62527849	T	C	AHNAK	Missense_Mutation	NM_001346445	exon5	c.A6568G	p.N2190D	SNP	exonic	AHNAK	.	nonsynonymous SNV	AHNAK:NM_001346445:exon5:c.A6568G:p.N2190D,AHNAK:NM_001346446:exon5:c.A6568G:p.N2190D,AHNAK:NM_001620:exon5:c.A6568G:p.N2190D	178	chr11	62527849	T	C	AS_SB_TABLE=87,86|0,5;DP=179;ECNT=2;MBQ=36,36;MFRL=180,137;MMQ=60,39;MPOS=11;POPAF=2.54;TLOD=11.68	GT:AD:AF:DP:F1R2:F2R1:PGT:PID:PS:SB	0|1	173	5	0.035	178
Pre-Subject 1	chr11	62528425	62528425	G	A	AHNAK	Silent	NM_001346445	exon5	c.C5992T	p.L1998L	SNP	exonic	AHNAK	.	synonymous SNV	AHNAK:NM_001346445:exon5:c.C5992T:p.L1998L,AHNAK:NM_001346446:exon5:c.C5992T:p.L1998L,AHNAK:NM_001620:exon5:c.C5992T:p.L1998L	177	chr11	62528425	G	A	AS_SB_TABLE=86,82|0,9;DP=191;ECNT=1;MBQ=36,21;MFRL=199,156;MMQ=52,40;MPOS=15;POPAF=7.30;TLOD=7.55	GT:AD:AF:DP:F1R2:F2R1:SB	0/1	168	9	0.04	177
Pre-Subject 1	chr11	62528626	62528626	A	G	AHNAK	Silent	NM_001346445	exon5	c.T5791C	p.L1931L	SNP	exonic	AHNAK	.	synonymous SNV	AHNAK:NM_001346445:exon5:c.T5791C:p.L1931L,AHNAK:NM_001346446:exon5:c.T5791C:p.L1931L,AHNAK:NM_001620:exon5:c.T5791C:p.L1931L	108	chr11	62528626	A	G	AS_SB_TABLE=49,54|3,2;DP=129;ECNT=1;MBQ=36,20;MFRL=181,79;MMQ=60,60;MPOS=2;POPAF=7.30;TLOD=4.38	GT:AD:AF:DP:F1R2:F2R1:SB	0/1	103	5	0.04	108
Pre-Subject 1	chr11	62528735	62528735	A	G	AHNAK	Silent	NM_001346445	exon5	c.T5682C	p.P1894P	SNP	exonic	AHNAK	.	synonymous SNV	AHNAK:NM_001346445:exon5:c.T5682C:p.P1894P,AHNAK:NM_001346446:exon5:c.T5682C:p.P1894P,AHNAK:NM_001620:exon5:c.T5682C:p.P1894P	148	chr11	62528735	A	G	AS_SB_TABLE=52,84|12,0;DP=150;ECNT=3;MBQ=36,14;MFRL=171,299;MMQ=60,60;MPOS=9;POPAF=7.30;TLOD=12.50	GT:AD:AF:DP:F1R2:F2R1:PGT:PID:PS:SB	0|1	136	12	0.064	148
Pre-Subject 1	chr11	62528745	62528745	A	G	AHNAK	Missense_Mutation	NM_001346445	exon5	c.T5672C	p.V1891A	SNP	exonic	AHNAK	.	nonsynonymous SNV	AHNAK:NM_001346445:exon5:c.T5672C:p.V1891A,AHNAK:NM_001346446:exon5:c.T5672C:p.V1891A,AHNAK:NM_001620:exon5:c.T5672C:p.V1891A	140	chr11	62528745	A	G	AS_SB_TABLE=51,80|9,0;DP=140;ECNT=3;MBQ=36,32;MFRL=171,298;MMQ=57,60;MPOS=1;POPAF=7.30;TLOD=9.48	GT:AD:AF:DP:F1R2:F2R1:PGT:PID:PS:SB	0|1	131	9	0.053	140
Pre-Subject 1	chr11	62528897	62528897	C	G	AHNAK	Silent	NM_001346445	exon5	c.G5520C	p.G1840G	SNP	exonic	AHNAK	.	synonymous SNV	AHNAK:NM_001346445:exon5:c.G5520C:p.G1840G,AHNAK:NM_001346446:exon5:c.G5520C:p.G1840G,AHNAK:NM_001620:exon5:c.G5520C:p.G1840G	153	chr11	62528897	C	G	AS_SB_TABLE=73,72|1,7;DP=156;ECNT=1;MBQ=36,24;MFRL=174,286;MMQ=60,49;MPOS=4;POPAF=7.30;TLOD=5.87	GT:AD:AF:DP:F1R2:F2R1:SB	0/1	145	8	0.042	153
Pre-Subject 1	chr11	62602409	62602409	G	A	EML3	Nonsense_Mutation	NM_001300793	exon22	c.C2650T	p.Q884X	SNP	exonic	EML3	.	stopgain	EML3:NM_001300793:exon22:c.C2650T:p.Q884X,EML3:NM_001300794:exon22:c.C2647T:p.Q883X	52	chr11	62602409	G	A	AS_SB_TABLE=10,6|19,17;DP=58;ECNT=2;MBQ=36,36;MFRL=228,193;MMQ=60,60;MPOS=15;PON;POPAF=0.573;TLOD=142.19	GT:AD:AF:DP:F1R2:F2R1:PGT:PID:PS:SB	0|1	16	36	0.686	52
Pre-Subject 1	chr11	62602412	62602412	C	G	EML3	Missense_Mutation	NM_001300793	exon22	c.G2647C	p.A883P	SNP	exonic	EML3	.	nonsynonymous SNV	EML3:NM_001300793:exon22:c.G2647C:p.A883P,EML3:NM_001300794:exon22:c.G2644C:p.A882P	51	chr11	62602412	C	G	AS_SB_TABLE=10,5|19,17;DP=51;ECNT=2;MBQ=36,36;MFRL=223,193;MMQ=60,60;MPOS=13;PON;POPAF=0.573;TLOD=142.73	GT:AD:AF:DP:F1R2:F2R1:PGT:PID:PS:SB	0|1	15	36	0.698	51
Pre-Subject 1	chr11	62648682	62648682	T	G	INTS5	Silent	NM_030628	exon2	c.A1398C	p.P466P	SNP	exonic	INTS5	.	synonymous SNV	INTS5:NM_030628:exon2:c.A1398C:p.P466P	98	chr11	62648682	T	G	AS_SB_TABLE=46,43|0,9;DP=103;ECNT=1;MBQ=36,14;MFRL=181,201;MMQ=60,60;MPOS=11;POPAF=7.30;TLOD=7.88	GT:AD:AF:DP:F1R2:F2R1:SB	0/1	89	9	0.072	98
Pre-Subject 1	chr11	62782231	62782231	T	G	TAF6L	Missense_Mutation	NM_006473	exon8	c.T725G	p.V242G	SNP	exonic	TAF6L	.	nonsynonymous SNV	TAF6L:NM_006473:exon8:c.T725G:p.V242G	31	chr11	62782231	T	G	AS_SB_TABLE=9,20|1,1;DP=32;ECNT=1;MBQ=36,34;MFRL=228,318;MMQ=60,60;MPOS=32;POPAF=7.30;TLOD=4.02	GT:AD:AF:DP:F1R2:F2R1:SB	0/1	29	2	0.092	31
Pre-Subject 1	chr11	62910144	62910144	T	G	CHRM1	Silent	NM_000738	exon2	c.A957C	p.P319P	SNP	exonic	CHRM1	.	synonymous SNV	CHRM1:NM_000738:exon2:c.A957C:p.P319P	122	chr11	62910144	T	G	AS_SB_TABLE=61,57|0,4;DP=140;ECNT=3;MBQ=32,25;MFRL=189,232;MMQ=60,60;MPOS=27;POPAF=7.30;TLOD=3.11	GT:AD:AF:DP:F1R2:F2R1:SB	0/1	118	4	0.028	122
Pre-Subject 1	chr11	62910158	62910158	T	G	CHRM1	Missense_Mutation	NM_000738	exon2	c.A943C	p.T315P	SNP	exonic	CHRM1	.	nonsynonymous SNV	CHRM1:NM_000738:exon2:c.A943C:p.T315P	120	chr11	62910158	T	G	AS_SB_TABLE=54,51|0,15;DP=140;ECNT=3;MBQ=32,14;MFRL=195,161;MMQ=60,60;MPOS=28;POPAF=7.30;TLOD=4.11	GT:AD:AF:DP:F1R2:F2R1:SB	0/1	105	15	0.08	120
Pre-Subject 1	chr11	62910172	62910172	T	G	CHRM1	Missense_Mutation	NM_000738	exon2	c.A929C	p.E310A	SNP	exonic	CHRM1	.	nonsynonymous SNV	CHRM1:NM_000738:exon2:c.A929C:p.E310A	113	chr11	62910172	T	G	AS_SB_TABLE=47,59|0,7;DP=131;ECNT=3;MBQ=32,14;MFRL=195,195;MMQ=60,60;MPOS=16;POPAF=7.30;TLOD=4.97	GT:AD:AF:DP:F1R2:F2R1:SB	0/1	106	7	0.052	113
Pre-Subject 1	chr11	63490944	63490944	T	C	PLAAT5	Missense_Mutation	NM_001146728	exon1	c.A91G	p.S31G	SNP	exonic	PLAAT5	.	nonsynonymous SNV	PLAAT5:NM_001146728:exon1:c.A91G:p.S31G,PLAAT5:NM_001146729:exon1:c.A91G:p.S31G,PLAAT5:NM_054108:exon1:c.A91G:p.S31G	18	chr11	63490944	T	C	AS_SB_TABLE=0,0|7,11;DP=18;ECNT=1;MBQ=0,36;MFRL=0,202;MMQ=60,60;MPOS=19;PON;POPAF=4.804e-03;TLOD=58.31	GT:AD:AF:DP:F1R2:F2R1:SB	0/1	0	18	0.949	18
Pre-Subject 1	chr11	63658884	63658884	A	C	ATL3	Missense_Mutation	NM_001290048	exon3	c.T228G	p.N76K	SNP	exonic	ATL3	.	nonsynonymous SNV	ATL3:NM_001290048:exon3:c.T228G:p.N76K,ATL3:NM_015459:exon3:c.T282G:p.N94K	56	chr11	63658884	A	C	AS_SB_TABLE=13,41|0,2;DP=57;ECNT=1;MBQ=36,36;MFRL=186,167;MMQ=60,60;MPOS=37;POPAF=7.30;TLOD=3.68	GT:AD:AF:DP:F1R2:F2R1:SB	0/1	54	2	0.053	56
Pre-Subject 1	chr11	63904138	63904138	C	A	MARK2	Missense_Mutation	NM_001039469	exon15	c.C1667A	p.P556Q	SNP	exonic	MARK2	.	nonsynonymous SNV	MARK2:NM_001039469:exon15:c.C1667A:p.P556Q,MARK2:NM_017490:exon15:c.C1565A:p.P522Q	20	chr11	63904138	C	A	AS_SB_TABLE=7,11|0,2;DP=20;ECNT=1;MBQ=36,36;MFRL=170,138;MMQ=60,60;MPOS=20;POPAF=7.30;TLOD=4.66	GT:AD:AF:DP:F1R2:F2R1:SB	0/1	18	2	0.148	20
Pre-Subject 1	chr11	64229254	64229254	T	A	NUDT22	Missense_Mutation	NM_001128613	exon3	c.T488A	p.L163Q	SNP	exonic	NUDT22	.	nonsynonymous SNV	NUDT22:NM_001128613:exon3:c.T488A:p.L163Q,NUDT22:NM_001271831:exon3:c.T488A:p.L163Q,NUDT22:NM_001128612:exon4:c.T587A:p.L196Q,NUDT22:NM_032344:exon4:c.T587A:p.L196Q	19	chr11	64229254	T	A	AS_SB_TABLE=13,5|1,0;DP=19;ECNT=6;MBQ=36,14;MFRL=199,246;MMQ=60,60;MPOS=14;POPAF=7.30;TLOD=7.46	GT:AD:AF:DP:F1R2:F2R1:SB	0/1	18	1	0.196	19
Pre-Subject 1	chr11	64265225	64265225	C	T	PLCB3	Missense_Mutation	NM_001184883	exon22	c.C2639T	p.S880L	SNP	exonic	PLCB3	.	nonsynonymous SNV	PLCB3:NM_001184883:exon22:c.C2639T:p.S880L,PLCB3:NM_000932:exon24:c.C2840T:p.S947L,PLCB3:NM_001316314:exon24:c.C2840T:p.S947L	32	chr11	64265225	C	T	AS_SB_TABLE=11,12|7,2;DP=34;ECNT=1;MBQ=36,36;MFRL=184,207;MMQ=60,60;MPOS=21;POPAF=7.30;TLOD=23.91	GT:AD:AF:DP:F1R2:F2R1:SB	0/1	23	9	0.273	32
Pre-Subject 1	chr11	64805909	64805909	T	G	MEN1	Missense_Mutation	NM_001370251	exon8	c.A1154C	p.D385A	SNP	exonic	MEN1	.	nonsynonymous SNV	MEN1:NM_001370251:exon8:c.A1154C:p.D385A	15	chr11	64805909	T	G	AS_SB_TABLE=1,12|0,2;DP=16;ECNT=3;MBQ=32,14;MFRL=248,237;MMQ=60,56;MPOS=17;POPAF=7.30;TLOD=3.42	GT:AD:AF:DP:F1R2:F2R1:PGT:PID:PS:SB	0|1	13	2	0.17	15
Pre-Subject 1	chr11	64805911	64805911	A	C	MEN1	Silent	NM_001370251	exon8	c.T1152G	p.A384A	SNP	exonic	MEN1	.	synonymous SNV	MEN1:NM_001370251:exon8:c.T1152G:p.A384A	13	chr11	64805911	A	C	AS_SB_TABLE=1,10|0,2;DP=13;ECNT=3;MBQ=36,14;MFRL=221,237;MMQ=60,56;MPOS=19;POPAF=7.30;TLOD=3.58	GT:AD:AF:DP:F1R2:F2R1:PGT:PID:PS:SB	0|1	11	2	0.191	13
Pre-Subject 1	chr11	65172748	65172748	T	G	SPDYC	Missense_Mutation	NM_001008778	exon6	c.T581G	p.V194G	SNP	exonic	SPDYC	.	nonsynonymous SNV	SPDYC:NM_001008778:exon6:c.T581G:p.V194G	52	chr11	65172748	T	G	AS_SB_TABLE=21,9|15,7;DP=55;ECNT=1;MBQ=36,36;MFRL=186,223;MMQ=60,60;MPOS=20;POPAF=4.61;TLOD=70.80	GT:AD:AF:DP:F1R2:F2R1:SB	0/1	30	22	0.427	52
Pre-Subject 1	chr11	65581592	65581592	G	A	EHBP1L1	Missense_Mutation	NM_001099409	exon9	c.G920A	p.R307Q	SNP	exonic	EHBP1L1	.	nonsynonymous SNV	EHBP1L1:NM_001099409:exon9:c.G920A:p.R307Q	29	chr11	65581592	G	A	AS_SB_TABLE=7,6|11,5;DP=34;ECNT=1;MBQ=32,34;MFRL=153,194;MMQ=60,60;MPOS=14;PON;POPAF=0.305;TLOD=46.19	GT:AD:AF:DP:F1R2:F2R1:SB	0/1	13	16	0.544	29
Pre-Subject 1	chr11	65589783	65589783	A	C	EHBP1L1	Silent	NM_001351087	exon12	c.A1692C	p.P564P	SNP	exonic	EHBP1L1	.	synonymous SNV	EHBP1L1:NM_001351087:exon12:c.A1692C:p.P564P,EHBP1L1:NM_001099409:exon13:c.A3966C:p.P1322P	12	chr11	65589783	A	C	AS_SB_TABLE=2,5|5,0;DP=12;ECNT=5;MBQ=36,14;MFRL=233,210;MMQ=60,60;MPOS=12;POPAF=7.30;TLOD=11.80	GT:AD:AF:DP:F1R2:F2R1:PGT:PID:PS:SB	0|1	7	5	0.382	12
Pre-Subject 1	chr11	65589789	65589789	A	C	EHBP1L1	Silent	NM_001351087	exon12	c.A1698C	p.P566P	SNP	exonic	EHBP1L1	.	synonymous SNV	EHBP1L1:NM_001351087:exon12:c.A1698C:p.P566P,EHBP1L1:NM_001099409:exon13:c.A3972C:p.P1324P	14	chr11	65589789	A	C	AS_SB_TABLE=5,6|3,0;DP=15;ECNT=5;MBQ=36,14;MFRL=263,143;MMQ=60,60;MPOS=25;POPAF=7.30;TLOD=3.36	GT:AD:AF:DP:F1R2:F2R1:PGT:PID:PS:SB	0|1	11	3	0.194	14
Pre-Subject 1	chr11	65589793	65589793	A	C	EHBP1L1	Missense_Mutation	NM_001351087	exon12	c.A1702C	p.T568P	SNP	exonic	EHBP1L1	.	nonsynonymous SNV	EHBP1L1:NM_001351087:exon12:c.A1702C:p.T568P,EHBP1L1:NM_001099409:exon13:c.A3976C:p.T1326P	15	chr11	65589793	A	C	AS_SB_TABLE=6,7|2,0;DP=15;ECNT=5;MBQ=36,21;MFRL=233,176;MMQ=60,50;MPOS=33;POPAF=7.30;TLOD=3.28	GT:AD:AF:DP:F1R2:F2R1:PGT:PID:PS:SB	0|1	13	2	0.183	15
Pre-Subject 1	chr11	65589795	65589795	A	C	EHBP1L1	Silent	NM_001351087	exon12	c.A1704C	p.T568T	SNP	exonic	EHBP1L1	.	synonymous SNV	EHBP1L1:NM_001351087:exon12:c.A1704C:p.T568T,EHBP1L1:NM_001099409:exon13:c.A3978C:p.T1326T	16	chr11	65589795	A	C	AS_SB_TABLE=6,7|3,0;DP=16;ECNT=5;MBQ=36,14;MFRL=233,210;MMQ=60,60;MPOS=34;POPAF=7.30;TLOD=7.05	GT:AD:AF:DP:F1R2:F2R1:PGT:PID:PS:SB	0|1	13	3	0.232	16
Pre-Subject 1	chr11	65598576	65598576	T	G	MAP3K11	Silent	NM_002419	exon10	c.A2259C	p.P753P	SNP	exonic	MAP3K11	.	synonymous SNV	MAP3K11:NM_002419:exon10:c.A2259C:p.P753P	21	chr11	65598576	T	G	AS_SB_TABLE=12,5|0,4;DP=24;ECNT=1;MBQ=36,18;MFRL=219,210;MMQ=60,60;MPOS=19;POPAF=7.30;TLOD=3.78	GT:AD:AF:DP:F1R2:F2R1:SB	0/1	17	4	0.189	21
Pre-Subject 1	chr11	65921337	65921337	A	C	DRAP1	Missense_Mutation	NM_006442	exon7	c.A520C	p.T174P	SNP	exonic	DRAP1	.	nonsynonymous SNV	DRAP1:NM_006442:exon7:c.A520C:p.T174P	24	chr11	65921337	A	C	AS_SB_TABLE=5,6|13,0;DP=28;ECNT=4;MBQ=36,14;MFRL=145,192;MMQ=60,60;MPOS=14;POPAF=7.30;TLOD=27.39	GT:AD:AF:DP:F1R2:F2R1:SB	0/1	11	13	0.504	24
Pre-Subject 1	chr11	65921339	65921339	A	C	DRAP1	Silent	NM_006442	exon7	c.A522C	p.T174T	SNP	exonic	DRAP1	.	synonymous SNV	DRAP1:NM_006442:exon7:c.A522C:p.T174T	25	chr11	65921339	A	C	AS_SB_TABLE=9,7|9,0;DP=26;ECNT=4;MBQ=34,14;MFRL=148,192;MMQ=60,60;MPOS=9;POPAF=7.30;TLOD=9.93	GT:AD:AF:DP:F1R2:F2R1:SB	0/1	16	9	0.326	25
Pre-Subject 1	chr11	65921343	65921343	T	G	DRAP1	Missense_Mutation	NM_006442	exon7	c.T526G	p.F176V	SNP	exonic	DRAP1	.	nonsynonymous SNV	DRAP1:NM_006442:exon7:c.T526G:p.F176V	24	chr11	65921343	T	G	AS_SB_TABLE=10,7|7,0;DP=24;ECNT=4;MBQ=36,14;MFRL=145,190;MMQ=60,60;MPOS=5;POPAF=7.30;TLOD=6.99	GT:AD:AF:DP:F1R2:F2R1:SB	0/1	17	7	0.274	24
Pre-Subject 1	chr11	65921378	65921378	A	C	DRAP1	Silent	NM_006442	exon7	c.A561C	p.P187P	SNP	exonic	DRAP1	.	synonymous SNV	DRAP1:NM_006442:exon7:c.A561C:p.P187P	33	chr11	65921378	A	C	AS_SB_TABLE=18,12|3,0;DP=36;ECNT=4;MBQ=32,14;MFRL=142,181;MMQ=60,60;MPOS=32;POPAF=7.30;TLOD=3.94	GT:AD:AF:DP:F1R2:F2R1:SB	0/1	30	3	0.155	33
Pre-Subject 1	chr11	66057348	66057348	A	C	SF3B2	Silent	NM_006842	exon7	c.A750C	p.P250P	SNP	exonic	SF3B2	.	synonymous SNV	SF3B2:NM_006842:exon7:c.A750C:p.P250P	40	chr11	66057348	A	C	AS_SB_TABLE=11,25|4,0;DP=43;ECNT=1;MBQ=36,21;MFRL=203,138;MMQ=60,60;MPOS=20;POPAF=7.30;TLOD=6.84	GT:AD:AF:DP:F1R2:F2R1:SB	0/1	36	4	0.108	40
Pre-Subject 1	chr11	66070664	66070664	A	C	PACS1	Missense_Mutation	NM_018026	exon1	c.A178C	p.T60P	SNP	exonic	PACS1	.	nonsynonymous SNV	PACS1:NM_018026:exon1:c.A178C:p.T60P	17	chr11	66070664	A	C	AS_SB_TABLE=11,3|3,0;DP=18;ECNT=1;MBQ=36,27;MFRL=176,240;MMQ=60,60;MPOS=2;POPAF=7.30;TLOD=3.17	GT:AD:AF:DP:F1R2:F2R1:SB	0/1	14	3	0.205	17
Pre-Subject 1	chr11	66315738	66315738	T	G	CD248	Silent	NM_020404	exon1	c.A1290C	p.P430P	SNP	exonic	CD248	.	synonymous SNV	CD248:NM_020404:exon1:c.A1290C:p.P430P	48	chr11	66315738	T	G	AS_SB_TABLE=32,9|0,7;DP=53;ECNT=1;MBQ=36,14;MFRL=220,313;MMQ=60,60;MPOS=22;POPAF=7.30;TLOD=8.69	GT:AD:AF:DP:F1R2:F2R1:SB	0/1	41	7	0.145	48
Pre-Subject 1	chr11	66545727	66545727	A	C	ZDHHC24	Missense_Mutation	NM_001348571	exon1	c.T277G	p.W93G	SNP	exonic	ZDHHC24	.	nonsynonymous SNV	ZDHHC24:NM_001348571:exon1:c.T277G:p.W93G,ZDHHC24:NM_207340:exon1:c.T277G:p.W93G	14	chr11	66545727	A	C	AS_SB_TABLE=3,9|2,0;DP=17;ECNT=4;MBQ=36,21;MFRL=172,217;MMQ=60,60;MPOS=11;POPAF=7.30;TLOD=4.19	GT:AD:AF:DP:F1R2:F2R1:SB	0/1	12	2	0.185	14
Pre-Subject 1	chr11	66545732	66545732	T	C	ZDHHC24	Missense_Mutation	NM_001348571	exon1	c.A272G	p.Q91R	SNP	exonic	ZDHHC24	.	nonsynonymous SNV	ZDHHC24:NM_001348571:exon1:c.A272G:p.Q91R,ZDHHC24:NM_207340:exon1:c.A272G:p.Q91R	16	chr11	66545732	T	C	AS_SB_TABLE=2,3|4,7;DP=18;ECNT=4;MBQ=32,36;MFRL=177,167;MMQ=60,60;MPOS=24;PON;POPAF=0.585;TLOD=38.25	GT:AD:AF:DP:F1R2:F2R1:SB	0/1	5	11	0.667	16
Pre-Subject 1	chr11	67393507	67393507	T	C	RAD9A	Silent	NM_001243224	exon1	c.T18C	p.S6S	SNP	exonic	RAD9A	.	synonymous SNV	RAD9A:NM_001243224:exon1:c.T18C:p.S6S,RAD9A:NM_004584:exon4:c.T246C:p.S82S	58	chr11	67393507	T	C	AS_SB_TABLE=34,22|0,2;DP=63;ECNT=1;MBQ=36,36;MFRL=190,230;MMQ=60,60;MPOS=5;POPAF=7.30;TLOD=3.16	GT:AD:AF:DP:F1R2:F2R1:SB	0/1	56	2	0.05	58
Pre-Subject 1	chr11	67494940	67494940	C	T	PITPNM1	Missense_Mutation	NM_001130848	exon18	c.G2645A	p.R882Q	SNP	exonic	PITPNM1	.	nonsynonymous SNV	PITPNM1:NM_001130848:exon18:c.G2645A:p.R882Q,PITPNM1:NM_004910:exon18:c.G2648A:p.R883Q	64	chr11	67494940	C	T	AS_SB_TABLE=25,7|22,10;DP=68;ECNT=1;MBQ=36,36;MFRL=193,181;MMQ=60,60;MPOS=20;POPAF=2.11;TLOD=107.24	GT:AD:AF:DP:F1R2:F2R1:SB	0/1	32	32	0.494	64
Pre-Subject 1	chr11	67504118	67504118	C	A	PITPNM1	Missense_Mutation	NM_001130848	exon2	c.G63T	p.Q21H	SNP	exonic	PITPNM1	.	nonsynonymous SNV	PITPNM1:NM_001130848:exon2:c.G63T:p.Q21H,PITPNM1:NM_004910:exon2:c.G63T:p.Q21H	30	chr11	67504118	C	A	AS_SB_TABLE=13,15|1,1;DP=31;ECNT=1;MBQ=36,36;MFRL=173,146;MMQ=60,60;MPOS=30;POPAF=7.30;TLOD=4.02	GT:AD:AF:DP:F1R2:F2R1:SB	0/1	28	2	0.094	30
Pre-Subject 1	chr11	67585218	67585218	A	G	GSTP1	Missense_Mutation	NM_000852	exon5	c.A313G	p.I105V	SNP	exonic	GSTP1	.	nonsynonymous SNV	GSTP1:NM_000852:exon5:c.A313G:p.I105V	20	chr11	67585218	A	G	AS_SB_TABLE=6,2|8,4;DP=20;ECNT=1;MBQ=36,36;MFRL=173,144;MMQ=60,60;MPOS=19;PON;POPAF=0.457;TLOD=37.22	GT:AD:AF:DP:F1R2:F2R1:SB	0/1	8	12	0.571	20
Pre-Subject 1	chr11	67646909	67646909	G	A	ACY3	Silent	NM_080658	exon3	c.C135T	p.S45S	SNP	exonic	ACY3	.	synonymous SNV	ACY3:NM_080658:exon3:c.C135T:p.S45S	59	chr11	67646909	G	A	AS_SB_TABLE=10,12|15,22;DP=59;ECNT=1;MBQ=36,36;MFRL=185,187;MMQ=60,60;MPOS=11;POPAF=2.44;TLOD=125.71	GT:AD:AF:DP:F1R2:F2R1:SB	0/1	22	37	0.619	59
Pre-Subject 1	chr11	68047664	68047664	C	G	TCIRG1	Missense_Mutation	NM_006053	exon7	c.C675G	p.F225L	SNP	exonic	TCIRG1	.	nonsynonymous SNV	TCIRG1:NM_006053:exon7:c.C675G:p.F225L,TCIRG1:NM_001351059:exon11:c.C429G:p.F143L,TCIRG1:NM_006019:exon12:c.C1323G:p.F441L	92	chr11	68047664	C	G	AS_SB_TABLE=41,38|5,8;DP=99;ECNT=2;MBQ=36,36;MFRL=203,190;MMQ=60,60;MPOS=21;POPAF=7.30;TLOD=33.83	GT:AD:AF:DP:F1R2:F2R1:SB	0/1	79	13	0.152	92
Pre-Subject 1	chr11	68047706	68047706	C	G	TCIRG1	Missense_Mutation	NM_006053	exon7	c.C717G	p.I239M	SNP	exonic	TCIRG1	.	nonsynonymous SNV	TCIRG1:NM_006053:exon7:c.C717G:p.I239M,TCIRG1:NM_001351059:exon11:c.C471G:p.I157M,TCIRG1:NM_006019:exon12:c.C1365G:p.I455M	95	chr11	68047706	C	G	AS_SB_TABLE=48,35|7,5;DP=101;ECNT=2;MBQ=36,36;MFRL=192,214;MMQ=60,60;MPOS=21;POPAF=7.30;TLOD=31.95	GT:AD:AF:DP:F1R2:F2R1:SB	0/1	83	12	0.137	95
Pre-Subject 1	chr11	68262136	68262136	-	GGGGCTTTGGGG	C11orf24	In_Frame_Ins	NM_022338	exon4	c.858_859insCCCCAAAGCCCC	p.P286_T287insPQSP	INS	exonic	C11orf24	.	nonframeshift insertion	C11orf24:NM_022338:exon4:c.858_859insCCCCAAAGCCCC:p.P286_T287insPQSP	13	chr11	68262136	T	TGGGGCTTTGGGG	AS_SB_TABLE=8,4|0,1;DP=20;ECNT=3;MBQ=36,0;MFRL=235,179;MMQ=60,60;MPOS=50;POPAF=7.30;TLOD=3.39	GT:AD:AF:DP:F1R2:F2R1:SB	0/1	12	1	0.181	13
Pre-Subject 1	chr11	68262147	68262147	T	G	C11orf24	Missense_Mutation	NM_022338	exon4	c.A848C	p.E283A	SNP	exonic	C11orf24	.	nonsynonymous SNV	C11orf24:NM_022338:exon4:c.A848C:p.E283A	20	chr11	68262147	T	G	AS_SB_TABLE=9,4|0,7;DP=22;ECNT=3;MBQ=36,14;MFRL=231,209;MMQ=60,60;MPOS=19;POPAF=7.30;TLOD=14.47	GT:AD:AF:DP:F1R2:F2R1:SB	0/1	13	7	0.359	20
Pre-Subject 1	chr11	68262149	68262149	T	G	C11orf24	Silent	NM_022338	exon4	c.A846C	p.P282P	SNP	exonic	C11orf24	.	synonymous SNV	C11orf24:NM_022338:exon4:c.A846C:p.P282P	22	chr11	68262149	T	G	AS_SB_TABLE=10,7|0,5;DP=22;ECNT=3;MBQ=32,14;MFRL=231,266;MMQ=60,60;MPOS=18;POPAF=7.30;TLOD=6.55	GT:AD:AF:DP:F1R2:F2R1:SB	0/1	17	5	0.229	22
Pre-Subject 1	chr11	68262547	68262547	C	T	C11orf24	Missense_Mutation	NM_022338	exon4	c.G448A	p.A150T	SNP	exonic	C11orf24	.	nonsynonymous SNV	C11orf24:NM_022338:exon4:c.G448A:p.A150T	27	chr11	68262547	C	T	AS_SB_TABLE=3,8|6,10;DP=33;ECNT=1;MBQ=36,36;MFRL=233,216;MMQ=60,60;MPOS=14;PON;POPAF=0.383;TLOD=49.25	GT:AD:AF:DP:F1R2:F2R1:SB	0/1	11	16	0.581	27
Pre-Subject 1	chr11	68750200	68750200	C	T	TESMIN	Missense_Mutation	NM_001039656	exon2	c.G461A	p.R154H	SNP	exonic	TESMIN	.	nonsynonymous SNV	TESMIN:NM_001039656:exon2:c.G461A:p.R154H,TESMIN:NM_004923:exon2:c.G461A:p.R154H	31	chr11	68750200	C	T	AS_SB_TABLE=19,10|2,0;DP=33;ECNT=1;MBQ=36,36;MFRL=176,154;MMQ=60,60;MPOS=20;POPAF=7.30;TLOD=3.97	GT:AD:AF:DP:F1R2:F2R1:SB	0/1	29	2	0.09	31
Pre-Subject 1	chr11	70331991	70331991	G	A	PPFIA1	Missense_Mutation	NM_003626	exon9	c.G1109A	p.R370H	SNP	exonic	PPFIA1	.	nonsynonymous SNV	PPFIA1:NM_003626:exon9:c.G1109A:p.R370H,PPFIA1:NM_177423:exon9:c.G1109A:p.R370H	46	chr11	70331991	G	A	AS_SB_TABLE=7,11|12,16;DP=48;ECNT=1;MBQ=36,36;MFRL=226,203;MMQ=60,60;MPOS=25;POPAF=4.31;TLOD=90.21	GT:AD:AF:DP:F1R2:F2R1:SB	0/1	18	28	0.588	46
Pre-Subject 1	chr11	71444125	71444125	C	T	DHCR7	Silent	NM_001163817	exon4	c.G189A	p.Q63Q	SNP	exonic	DHCR7	.	synonymous SNV	DHCR7:NM_001163817:exon4:c.G189A:p.Q63Q,DHCR7:NM_001360:exon4:c.G189A:p.Q63Q	48	chr11	71444125	C	T	AS_SB_TABLE=10,6|14,18;DP=51;ECNT=3;MBQ=36,36;MFRL=225,176;MMQ=60,60;MPOS=24;PON;POPAF=0.224;TLOD=108.76	GT:AD:AF:DP:F1R2:F2R1:SB	0/1	16	32	0.661	48
Pre-Subject 1	chr11	71444150	71444150	T	C	DHCR7	Missense_Mutation	NM_001163817	exon4	c.A164G	p.Y55C	SNP	exonic	DHCR7	.	nonsynonymous SNV	DHCR7:NM_001163817:exon4:c.A164G:p.Y55C,DHCR7:NM_001360:exon4:c.A164G:p.Y55C	47	chr11	71444150	T	C	AS_SB_TABLE=16,29|1,1;DP=48;ECNT=3;MBQ=36,36;MFRL=188,225;MMQ=60,60;MPOS=9;POPAF=7.30;TLOD=3.44	GT:AD:AF:DP:F1R2:F2R1:PGT:PID:PS:SB	0|1	45	2	0.061	47
Pre-Subject 1	chr11	71444160	71444160	A	T	DHCR7	Missense_Mutation	NM_001163817	exon4	c.T154A	p.F52I	SNP	exonic	DHCR7	.	nonsynonymous SNV	DHCR7:NM_001163817:exon4:c.T154A:p.F52I,DHCR7:NM_001360:exon4:c.T154A:p.F52I	46	chr11	71444160	A	T	AS_SB_TABLE=15,29|1,1;DP=46;ECNT=3;MBQ=36,0;MFRL=190,225;MMQ=60,60;MPOS=50;POPAF=7.30;TLOD=3.53	GT:AD:AF:DP:F1R2:F2R1:PGT:PID:PS:SB	0|1	44	2	0.065	46
Pre-Subject 1	chr11	71527690	71527716	CTGCTGTTCCTCAGGCTGTGGGTCATC	-	KRTAP5-7	In_Frame_Del	NM_001012503	exon1	c.390_416del	p.S133_C141del	DEL	exonic	KRTAP5-7	.	nonframeshift deletion	KRTAP5-7:NM_001012503:exon1:c.390_416del:p.S133_C141del	128	chr11	71527689	GCTGCTGTTCCTCAGGCTGTGGGTCATC	G	AS_SB_TABLE=73,40|8,7;DP=134;ECNT=1;MBQ=36,36;MFRL=198,201;MMQ=60,57;MPOS=20;PON;POPAF=1.43;TLOD=33.37	GT:AD:AF:DP:F1R2:F2R1:SB	0/1	113	15	0.116	128
Pre-Subject 1	chr11	72294331	72294331	G	T	CLPB	Silent	NM_001258393	exon13	c.C1587A	p.A529A	SNP	exonic	CLPB	.	synonymous SNV	CLPB:NM_001258393:exon13:c.C1587A:p.A529A,CLPB:NM_001258392:exon14:c.C1674A:p.A558A,CLPB:NM_030813:exon15:c.C1764A:p.A588A,CLPB:NM_001258394:exon16:c.C1629A:p.A543A	42	chr11	72294331	G	T	AS_SB_TABLE=24,15|3,0;DP=42;ECNT=2;MBQ=36,14;MFRL=203,190;MMQ=60,60;MPOS=12;POPAF=7.30;TLOD=4.65	GT:AD:AF:DP:F1R2:F2R1:SB	0/1	39	3	0.078	42
Pre-Subject 1	chr11	72826185	72826185	C	T	ATG16L2	Missense_Mutation	NM_001318766	exon11	c.C797T	p.A266V	SNP	exonic	ATG16L2	.	nonsynonymous SNV	ATG16L2:NM_001318766:exon11:c.C797T:p.A266V,ATG16L2:NM_033388:exon11:c.C1115T:p.A372V	35	chr11	72826185	C	T	AS_SB_TABLE=12,21|0,2;DP=36;ECNT=1;MBQ=36,36;MFRL=177,290;MMQ=60,60;MPOS=28;POPAF=7.30;TLOD=3.89	GT:AD:AF:DP:F1R2:F2R1:SB	0/1	33	2	0.085	35
Pre-Subject 1	chr11	72838870	72838872	CGG	-	FCHSD2	In_Frame_Del	NM_014824	exon20	c.2142_2144del	p.R715del	DEL	exonic	FCHSD2	.	nonframeshift deletion	FCHSD2:NM_014824:exon20:c.2142_2144del:p.R715del	40	chr11	72838869	CCGG	C	AS_SB_TABLE=19,18|3,0;DP=40;ECNT=5;MBQ=36,36;MFRL=172,173;MMQ=60,60;MPOS=13;POPAF=4.01;TLOD=7.84	GT:AD:AF:DP:F1R2:F2R1:PGT:PID:PS:SB	0|1	37	3	0.093	40
Pre-Subject 1	chr11	73927284	73927285	GG	-	PAAF1	Nonsense_Mutation	NM_001363556	exon10	c.1105delG	p.V369*	DEL	exonic	PAAF1	.	stopgain	PAAF1:NM_001363556:exon10:c.1105delG:p.V369*,PAAF1:NM_001267806:exon12:c.757delG:p.V253*,PAAF1:NM_025155:exon12:c.1102delG:p.V368*,PAAF1:NM_001267803:exon13:c.1051delG:p.V351*,PAAF1:NM_001267804:exon13:c.1051delG:p.V351*,PAAF1:NM_001267805:exon13:c.1051delG:p.V351*	41	chr11	73927283	AGG	A	AS_SB_TABLE=19,17|0,5;DP=42;ECNT=6;MBQ=36,36;MFRL=165,122;MMQ=60,60;MPOS=27;POPAF=4.13;TLOD=11.41	GT:AD:AF:DP:F1R2:F2R1:PGT:PID:PS:SB	0|1	36	5	0.118	41
Pre-Subject 1	chr11	73927287	73927290	AGCC	-	PAAF1	Frame_Shift_Del	NM_001363556	exon10	c.1107_1110del	p.A370Hfs*37	DEL	exonic	PAAF1	.	frameshift deletion	PAAF1:NM_001363556:exon10:c.1107_1110del:p.A370Hfs*37,PAAF1:NM_001267806:exon12:c.759_762del:p.A254Hfs*37,PAAF1:NM_025155:exon12:c.1104_1107del:p.A369Hfs*37,PAAF1:NM_001267803:exon13:c.1053_1056del:p.A352Hfs*37,PAAF1:NM_001267804:exon13:c.1053_1056del:p.A352Hfs*37,PAAF1:NM_001267805:exon13:c.1053_1056del:p.A352Hfs*37	42	chr11	73927286	TAGCC	T	AS_SB_TABLE=20,17|0,5;DP=42;ECNT=6;MBQ=36,32;MFRL=164,122;MMQ=60,60;MPOS=26;POPAF=7.30;TLOD=11.36	GT:AD:AF:DP:F1R2:F2R1:PGT:PID:PS:SB	0|1	37	5	0.116	42
Pre-Subject 1	chr11	73927293	73927293	A	T	PAAF1	Silent	NM_001363556	exon10	c.A1113T	p.T371T	SNP	exonic	PAAF1	.	synonymous SNV	PAAF1:NM_001363556:exon10:c.A1113T:p.T371T,PAAF1:NM_001267806:exon12:c.A765T:p.T255T,PAAF1:NM_025155:exon12:c.A1110T:p.T370T,PAAF1:NM_001267803:exon13:c.A1059T:p.T353T,PAAF1:NM_001267804:exon13:c.A1059T:p.T353T,PAAF1:NM_001267805:exon13:c.A1059T:p.T353T	41	chr11	73927293	A	T	AS_SB_TABLE=19,18|0,4;DP=42;ECNT=6;MBQ=36,30;MFRL=164,127;MMQ=60,60;MPOS=28;POPAF=7.30;TLOD=5.27	GT:AD:AF:DP:F1R2:F2R1:SB	0/1	37	4	0.092	41
Pre-Subject 1	chr11	73927297	73927297	G	T	PAAF1	Nonsense_Mutation	NM_001363556	exon10	c.G1117T	p.E373X	SNP	exonic	PAAF1	.	stopgain	PAAF1:NM_001363556:exon10:c.G1117T:p.E373X,PAAF1:NM_001267806:exon12:c.G769T:p.E257X,PAAF1:NM_025155:exon12:c.G1114T:p.E372X,PAAF1:NM_001267803:exon13:c.G1063T:p.E355X,PAAF1:NM_001267804:exon13:c.G1063T:p.E355X,PAAF1:NM_001267805:exon13:c.G1063T:p.E355X	44	chr11	73927297	G	T	AS_SB_TABLE=20,19|0,5;DP=45;ECNT=6;MBQ=36,36;MFRL=166,122;MMQ=60,60;MPOS=25;POPAF=7.30;TLOD=11.31	GT:AD:AF:DP:F1R2:F2R1:PGT:PID:PS:SB	0|1	39	5	0.113	44
Pre-Subject 1	chr11	73927303	73927303	C	G	PAAF1	Missense_Mutation	NM_001363556	exon10	c.C1123G	p.Q375E	SNP	exonic	PAAF1	.	nonsynonymous SNV	PAAF1:NM_001363556:exon10:c.C1123G:p.Q375E,PAAF1:NM_001267806:exon12:c.C775G:p.Q259E,PAAF1:NM_025155:exon12:c.C1120G:p.Q374E,PAAF1:NM_001267803:exon13:c.C1069G:p.Q357E,PAAF1:NM_001267804:exon13:c.C1069G:p.Q357E,PAAF1:NM_001267805:exon13:c.C1069G:p.Q357E	41	chr11	73927303	C	G	AS_SB_TABLE=18,18|0,5;DP=42;ECNT=6;MBQ=36,36;MFRL=171,122;MMQ=60,60;MPOS=19;POPAF=7.30;TLOD=11.53	GT:AD:AF:DP:F1R2:F2R1:PGT:PID:PS:SB	0|1	36	5	0.125	41
Pre-Subject 1	chr11	74033817	74033817	G	A	C2CD3	Missense_Mutation	NM_001286577	exon31	c.C6343T	p.P2115S	SNP	exonic	C2CD3	.	nonsynonymous SNV	C2CD3:NM_001286577:exon31:c.C6343T:p.P2115S	73	chr11	74033817	G	A	AS_SB_TABLE=22,13|23,15;DP=76;ECNT=1;MBQ=36,36;MFRL=210,224;MMQ=60,60;MPOS=23;POPAF=2.00;TLOD=120.19	GT:AD:AF:DP:F1R2:F2R1:SB	0/1	35	38	0.516	73
Pre-Subject 1	chr11	74037576	74037576	T	C	C2CD3	Missense_Mutation	NM_001286577	exon30	c.A5783G	p.D1928G	SNP	exonic	C2CD3	.	nonsynonymous SNV	C2CD3:NM_001286577:exon30:c.A5783G:p.D1928G,C2CD3:NM_015531:exon30:c.A5783G:p.D1928G	38	chr11	74037576	T	C	AS_SB_TABLE=16,20|0,2;DP=39;ECNT=1;MBQ=36,34;MFRL=206,160;MMQ=60,60;MPOS=23;POPAF=7.30;TLOD=4.17	GT:AD:AF:DP:F1R2:F2R1:SB	0/1	36	2	0.077	38
Pre-Subject 1	chr11	74371791	74371791	A	T	PGM2L1	Nonsense_Mutation	NM_173582	exon3	c.T306A	p.C102X	SNP	exonic	PGM2L1	.	stopgain	PGM2L1:NM_173582:exon3:c.T306A:p.C102X	48	chr11	74371791	A	T	AS_SB_TABLE=20,26|0,2;DP=51;ECNT=1;MBQ=36,36;MFRL=177,244;MMQ=60,60;MPOS=22;POPAF=7.30;TLOD=3.48	GT:AD:AF:DP:F1R2:F2R1:SB	0/1	46	2	0.063	48
Pre-Subject 1	chr11	74748912	74748912	C	T	RNF169	Missense_Mutation	NM_001098638	exon1	c.C32T	p.S11F	SNP	exonic	RNF169	.	nonsynonymous SNV	RNF169:NM_001098638:exon1:c.C32T:p.S11F	27	chr11	74748912	C	T	AS_SB_TABLE=7,12|3,5;DP=28;ECNT=1;MBQ=36,36;MFRL=164,155;MMQ=60,60;MPOS=16;POPAF=7.30;TLOD=19.13	GT:AD:AF:DP:F1R2:F2R1:SB	0/1	19	8	0.34	27
Pre-Subject 1	chr11	74749380	74749380	C	T	RNF169	Missense_Mutation	NM_001098638	exon1	c.C500T	p.P167L	SNP	exonic	RNF169	.	nonsynonymous SNV	RNF169:NM_001098638:exon1:c.C500T:p.P167L	11	chr11	74749380	C	T	AS_SB_TABLE=2,1|6,2;DP=11;ECNT=1;MBQ=36,36;MFRL=165,153;MMQ=60,60;MPOS=19;POPAF=2.09;TLOD=25.66	GT:AD:AF:DP:F1R2:F2R1:SB	0/1	3	8	0.689	11
Pre-Subject 1	chr11	74927418	74927418	C	A	XRRA1	Silent	NM_001270380	exon7	c.G471T	p.V157V	SNP	exonic	XRRA1	.	synonymous SNV	XRRA1:NM_001270380:exon7:c.G471T:p.V157V,XRRA1:NM_182969:exon7:c.G471T:p.V157V	42	chr11	74927418	C	A	AS_SB_TABLE=27,13|1,1;DP=43;ECNT=1;MBQ=36,36;MFRL=205,318;MMQ=60,60;MPOS=21;POPAF=7.30;TLOD=3.58	GT:AD:AF:DP:F1R2:F2R1:SB	0/1	40	2	0.068	42
Pre-Subject 1	chr11	74936991	74936991	G	T	XRRA1	Missense_Mutation	NM_001270380	exon4	c.C172A	p.R58S	SNP	exonic	XRRA1	.	nonsynonymous SNV	XRRA1:NM_001270380:exon4:c.C172A:p.R58S,XRRA1:NM_182969:exon4:c.C172A:p.R58S	90	chr11	74936991	G	T	AS_SB_TABLE=38,13|25,14;DP=95;ECNT=1;MBQ=36,36;MFRL=199,188;MMQ=60,60;MPOS=19;POPAF=2.55;TLOD=118.30	GT:AD:AF:DP:F1R2:F2R1:SB	0/1	51	39	0.432	90
Pre-Subject 1	chr11	77325374	77325374	C	G	PAK1	Silent	NM_001128620	exon15	c.G1554C	p.V518V	SNP	exonic	PAK1	.	synonymous SNV	PAK1:NM_001128620:exon15:c.G1554C:p.V518V	32	chr11	77325374	C	G	AS_SB_TABLE=4,25|0,3;DP=32;ECNT=1;MBQ=36,36;MFRL=195,205;MMQ=60,60;MPOS=9;POPAF=7.30;TLOD=7.08	GT:AD:AF:DP:F1R2:F2R1:SB	0/1	29	3	0.122	32
Pre-Subject 1	chr11	77676916	77676916	C	G	RSF1	Missense_Mutation	NM_016578	exon13	c.G3217C	p.E1073Q	SNP	exonic	RSF1	.	nonsynonymous SNV	RSF1:NM_016578:exon13:c.G3217C:p.E1073Q	19	chr11	77676916	C	G	AS_SB_TABLE=10,6|3,0;DP=22;ECNT=1;MBQ=32,14;MFRL=153,169;MMQ=60,60;MPOS=33;POPAF=7.30;TLOD=3.92	GT:AD:AF:DP:F1R2:F2R1:SB	0/1	16	3	0.201	19
Pre-Subject 1	chr11	78079607	78079607	T	C	NDUFC2	Silent	NM_001203260	exon1	c.A138G	p.L46L	SNP	exonic	NDUFC2;NDUFC2-KCTD14	.	synonymous SNV	NDUFC2-KCTD14:NM_001203260:exon1:c.A138G:p.L46L,NDUFC2-KCTD14:NM_001203261:exon1:c.A138G:p.L46L,NDUFC2-KCTD14:NM_001203262:exon1:c.A138G:p.L46L,NDUFC2:NM_001204054:exon1:c.A138G:p.L46L,NDUFC2:NM_001204055:exon1:c.A138G:p.L46L,NDUFC2:NM_004549:exon1:c.A138G:p.L46L	18	chr11	78079607	T	C	AS_SB_TABLE=0,0|16,2;DP=18;ECNT=2;MBQ=0,36;MFRL=0,246;MMQ=60,60;MPOS=15;PON;POPAF=0.064;TLOD=70.89	GT:AD:AF:DP:F1R2:F2R1:PGT:PID:PS:SB	0|1	0	18	0.95	18
Pre-Subject 1	chr11	78079609	78079609	G	C	NDUFC2	Missense_Mutation	NM_001203260	exon1	c.C136G	p.L46V	SNP	exonic	NDUFC2;NDUFC2-KCTD14	.	nonsynonymous SNV	NDUFC2-KCTD14:NM_001203260:exon1:c.C136G:p.L46V,NDUFC2-KCTD14:NM_001203261:exon1:c.C136G:p.L46V,NDUFC2-KCTD14:NM_001203262:exon1:c.C136G:p.L46V,NDUFC2:NM_001204054:exon1:c.C136G:p.L46V,NDUFC2:NM_001204055:exon1:c.C136G:p.L46V,NDUFC2:NM_004549:exon1:c.C136G:p.L46V	18	chr11	78079609	G	C	AS_SB_TABLE=8,1|8,1;DP=20;ECNT=2;MBQ=36,36;MFRL=250,220;MMQ=60,60;MPOS=15;PON;POPAF=0.735;TLOD=30.38	GT:AD:AF:DP:F1R2:F2R1:PGT:PID:PS:SB	0|1	9	9	0.505	18
Pre-Subject 1	chr11	78889921	78889921	T	G	TENM4	Silent	NM_001098816	exon9	c.A948C	p.R316R	SNP	exonic	TENM4	.	synonymous SNV	TENM4:NM_001098816:exon9:c.A948C:p.R316R	60	chr11	78889921	T	G	AS_SB_TABLE=26,22|0,12;DP=65;ECNT=1;MBQ=32,14;MFRL=201,226;MMQ=60,60;MPOS=17;POPAF=7.30;TLOD=7.87	GT:AD:AF:DP:F1R2:F2R1:SB	0/1	48	12	0.158	60
Pre-Subject 1	chr11	82733538	82733538	G	T	FAM181B	Silent	NM_175885	exon1	c.C192A	p.R64R	SNP	exonic	FAM181B	.	synonymous SNV	FAM181B:NM_175885:exon1:c.C192A:p.R64R	35	chr11	82733538	G	T	AS_SB_TABLE=21,9|5,0;DP=36;ECNT=2;MBQ=36,21;MFRL=162,147;MMQ=60,60;MPOS=34;POPAF=7.30;TLOD=8.59	GT:AD:AF:DP:F1R2:F2R1:SB	0/1	30	5	0.137	35
Pre-Subject 1	chr11	82733542	82733542	G	T	FAM181B	Missense_Mutation	NM_175885	exon1	c.C188A	p.T63N	SNP	exonic	FAM181B	.	nonsynonymous SNV	FAM181B:NM_175885:exon1:c.C188A:p.T63N	41	chr11	82733542	G	T	AS_SB_TABLE=24,14|3,0;DP=41;ECNT=2;MBQ=36,14;MFRL=162,147;MMQ=60,60;MPOS=30;POPAF=7.30;TLOD=7.87	GT:AD:AF:DP:F1R2:F2R1:SB	0/1	38	3	0.096	41
Pre-Subject 1	chr11	86252189	86252189	G	A	EED	Nonsense_Mutation	NM_001308007	exon3	c.G309A	p.W103X	SNP	exonic	EED	.	stopgain	EED:NM_001308007:exon3:c.G309A:p.W103X,EED:NM_001330334:exon3:c.G309A:p.W103X,EED:NM_003797:exon3:c.G309A:p.W103X	38	chr11	86252189	G	A	AS_SB_TABLE=35,1|2,0;DP=43;ECNT=1;MBQ=36,36;MFRL=209,241;MMQ=60,57;MPOS=17;POPAF=7.30;TLOD=3.69	GT:AD:AF:DP:F1R2:F2R1:SB	0/1	36	2	0.074	38
Pre-Subject 1	chr11	86465172	86465172	C	T	ME3	Missense_Mutation	NM_001014811	exon7	c.G838A	p.E280K	SNP	exonic	ME3	.	nonsynonymous SNV	ME3:NM_001014811:exon7:c.G838A:p.E280K,ME3:NM_001161586:exon8:c.G838A:p.E280K,ME3:NM_001351934:exon8:c.G838A:p.E280K,ME3:NM_006680:exon8:c.G838A:p.E280K	40	chr11	86465172	C	T	AS_SB_TABLE=6,29|0,5;DP=42;ECNT=1;MBQ=36,36;MFRL=199,230;MMQ=60,60;MPOS=18;POPAF=7.30;TLOD=13.01	GT:AD:AF:DP:F1R2:F2R1:SB	0/1	35	5	0.146	40
Pre-Subject 1	chr11	89490933	89490933	G	T	NOX4	Missense_Mutation	NM_001291927	exon1	c.C40A	p.R14S	SNP	exonic	NOX4	.	nonsynonymous SNV	NOX4:NM_001291927:exon1:c.C40A:p.R14S	28	chr11	89490933	G	T	AS_SB_TABLE=0,0|9,19;DP=29;ECNT=3;MBQ=0,36;MFRL=0,220;MMQ=60,60;MPOS=17;PON;POPAF=0.272;TLOD=111.40	GT:AD:AF:DP:F1R2:F2R1:SB	0/1	0	28	0.968	28
Pre-Subject 1	chr11	89490963	89490963	-	CTC	NOX4	In_Frame_Ins	NM_001291927	exon1	c.9_10insGAG	p.E3_M4insE	INS	exonic	NOX4	.	nonframeshift insertion	NOX4:NM_001291927:exon1:c.9_10insGAG:p.E3_M4insE	30	chr11	89490963	T	TCTC	AS_SB_TABLE=0,0|18,12;DP=32;ECNT=3;MBQ=0,36;MFRL=0,220;MMQ=60,60;MPOS=20;PON;POPAF=0.272;RPA=1,2;RU=CTC;STR;TLOD=130.97	GT:AD:AF:DP:F1R2:F2R1:SB	0/1	0	30	0.971	30
Pre-Subject 1	chr11	89798308	89798308	G	T	TRIM49	Missense_Mutation	NM_020358	exon8	c.C1181A	p.T394N	SNP	exonic	TRIM49	.	nonsynonymous SNV	TRIM49:NM_020358:exon8:c.C1181A:p.T394N	26	chr11	89798308	G	T	AS_SB_TABLE=14,9|3,0;DP=27;ECNT=1;MBQ=36,36;MFRL=215,223;MMQ=40,27;MPOS=5;POPAF=3.42;TLOD=4.82	GT:AD:AF:DP:F1R2:F2R1:SB	0/1	23	3	0.154	26
Pre-Subject 1	chr11	89873272	89873272	C	T	TRIM64B	Missense_Mutation	NM_001164397	exon4	c.G754A	p.A252T	SNP	exonic	TRIM64B	.	nonsynonymous SNV	TRIM64B:NM_001164397:exon4:c.G754A:p.A252T	90	chr11	89873272	C	T	AS_SB_TABLE=30,43|4,13;DP=91;ECNT=1;MBQ=36,36;MFRL=200,157;MMQ=27,27;MPOS=19;POPAF=2.63;TLOD=32.85	GT:AD:AF:DP:F1R2:F2R1:SB	0/1	73	17	0.183	90
Pre-Subject 1	chr11	90041068	90041068	C	G	TRIM49C	Missense_Mutation	NM_001195234	exon8	c.C877G	p.H293D	SNP	exonic	TRIM49C	.	nonsynonymous SNV	TRIM49C:NM_001195234:exon8:c.C877G:p.H293D	69	chr11	90041068	C	G	AS_SB_TABLE=28,20|15,6;DP=73;ECNT=2;MBQ=36,36;MFRL=221,209;MMQ=36,27;MPOS=14;PON;POPAF=0.475;TLOD=40.07	GT:AD:AF:DP:F1R2:F2R1:SB	0/1	48	21	0.304	69
Pre-Subject 1	chr11	92890582	92890582	T	C	FAT3	Silent	NM_001008781	exon25	c.T13143C	p.S4381S	SNP	exonic	FAT3	.	synonymous SNV	FAT3:NM_001008781:exon25:c.T13143C:p.S4381S,FAT3:NM_001367949:exon28:c.T13239C:p.S4413S	42	chr11	92890582	T	C	AS_SB_TABLE=13,14|4,11;DP=42;ECNT=1;MBQ=36,36;MFRL=207,189;MMQ=60,60;MPOS=23;POPAF=2.26;TLOD=45.34	GT:AD:AF:DP:F1R2:F2R1:SB	0/1	27	15	0.349	42
Pre-Subject 1	chr11	92969756	92969756	T	G	MTNR1B	Missense_Mutation	NM_005959	exon1	c.T31G	p.C11G	SNP	exonic	MTNR1B	.	nonsynonymous SNV	MTNR1B:NM_005959:exon1:c.T31G:p.C11G	28	chr11	92969756	T	G	AS_SB_TABLE=20,5|0,3;DP=30;ECNT=3;MBQ=36,14;MFRL=189,254;MMQ=60,60;MPOS=10;POPAF=7.30;TLOD=6.28	GT:AD:AF:DP:F1R2:F2R1:SB	0/1	25	3	0.156	28
Pre-Subject 1	chr11	92969760	92969760	A	C	MTNR1B	Missense_Mutation	NM_005959	exon1	c.A35C	p.E12A	SNP	exonic	MTNR1B	.	nonsynonymous SNV	MTNR1B:NM_005959:exon1:c.A35C:p.E12A	28	chr11	92969760	A	C	AS_SB_TABLE=20,5|0,3;DP=32;ECNT=3;MBQ=36,14;MFRL=189,254;MMQ=60,60;MPOS=14;POPAF=7.30;TLOD=5.09	GT:AD:AF:DP:F1R2:F2R1:SB	0/1	25	3	0.121	28
Pre-Subject 1	chr11	92969767	92969767	C	G	MTNR1B	Silent	NM_005959	exon1	c.C42G	p.G14G	SNP	exonic	MTNR1B	.	synonymous SNV	MTNR1B:NM_005959:exon1:c.C42G:p.G14G	32	chr11	92969767	C	G	AS_SB_TABLE=19,5|0,8;DP=33;ECNT=3;MBQ=36,14;MFRL=189,200;MMQ=60,60;MPOS=6;POPAF=7.30;TLOD=6.37	GT:AD:AF:DP:F1R2:F2R1:SB	0/1	24	8	0.219	32
Pre-Subject 1	chr11	94869250	94869250	A	C	AMOTL1	Silent	NM_001301007	exon11	c.A2391C	p.P797P	SNP	exonic	AMOTL1	.	synonymous SNV	AMOTL1:NM_001301007:exon11:c.A2391C:p.P797P,AMOTL1:NM_130847:exon12:c.A2541C:p.P847P	36	chr11	94869250	A	C	AS_SB_TABLE=15,14|7,0;DP=37;ECNT=1;MBQ=24,14;MFRL=203,210;MMQ=60,60;MPOS=12;POPAF=7.30;TLOD=5.71	GT:AD:AF:DP:F1R2:F2R1:SB	0/1	29	7	0.169	36
Pre-Subject 1	chr11	95189792	95189792	T	G	SESN3	Missense_Mutation	NM_144665	exon4	c.A512C	p.K171T	SNP	exonic	SESN3	.	nonsynonymous SNV	SESN3:NM_144665:exon4:c.A512C:p.K171T	46	chr11	95189792	T	G	AS_SB_TABLE=36,8|2,0;DP=48;ECNT=1;MBQ=36,36;MFRL=187,237;MMQ=60,60;MPOS=35;POPAF=7.30;TLOD=3.49	GT:AD:AF:DP:F1R2:F2R1:SB	0/1	44	2	0.063	46
Pre-Subject 1	chr11	95923891	95923891	C	T	MTMR2	Missense_Mutation	NM_016156	exon1	c.G64A	p.V22M	SNP	exonic	MTMR2	.	nonsynonymous SNV	MTMR2:NM_016156:exon1:c.G64A:p.V22M	50	chr11	95923891	C	T	AS_SB_TABLE=15,33|1,1;DP=54;ECNT=1;MBQ=36,36;MFRL=217,192;MMQ=60,60;MPOS=21;POPAF=7.30;TLOD=3.38	GT:AD:AF:DP:F1R2:F2R1:SB	0/1	48	2	0.059	50
Pre-Subject 1	chr11	96092211	96092219	TGCTGCTGC	-	MAML2	In_Frame_Del	NM_032427	exon2	c.1812_1820del	p.Q619_Q621del	DEL	exonic	MAML2	.	nonframeshift deletion	MAML2:NM_032427:exon2:c.1812_1820del:p.Q619_Q621del	11	chr11	96092210	TTGCTGCTGC	T	AS_SB_TABLE=0,0|8,3;DP=22;ECNT=1;MBQ=0,36;MFRL=0,203;MMQ=60,60;MPOS=14;PON;POPAF=2.47;RPA=13,10;RU=TGC;STR;TLOD=40.91	GT:AD:AF:DP:F1R2:F2R1:SB	0/1	0	11	0.939	11
Pre-Subject 1	chr11	105905270	105905270	T	C	GRIA4	Missense_Mutation	NM_001112812	exon8	c.T1127C	p.V376A	SNP	exonic	GRIA4	.	nonsynonymous SNV	GRIA4:NM_001112812:exon8:c.T1127C:p.V376A,GRIA4:NM_000829:exon9:c.T1127C:p.V376A,GRIA4:NM_001077243:exon9:c.T1127C:p.V376A,GRIA4:NM_001077244:exon9:c.T1127C:p.V376A	56	chr11	105905270	T	C	AS_SB_TABLE=11,43|1,1;DP=57;ECNT=1;MBQ=36,36;MFRL=200,244;MMQ=60,60;MPOS=6;POPAF=7.30;TLOD=3.18	GT:AD:AF:DP:F1R2:F2R1:SB	0/1	54	2	0.053	56
Pre-Subject 1	chr11	108511576	108511576	A	G	EXPH5	Missense_Mutation	NM_001144765	exon3	c.T3367C	p.C1123R	SNP	exonic	EXPH5	.	nonsynonymous SNV	EXPH5:NM_001144765:exon3:c.T3367C:p.C1123R,EXPH5:NM_001144764:exon4:c.T3463C:p.C1155R,EXPH5:NM_001144763:exon6:c.T3703C:p.C1235R,EXPH5:NM_015065:exon6:c.T3931C:p.C1311R,EXPH5:NM_001308019:exon7:c.T3910C:p.C1304R	55	chr11	108511576	A	G	AS_SB_TABLE=11,14|13,17;DP=59;ECNT=1;MBQ=36,36;MFRL=205,198;MMQ=60,60;MPOS=17;POPAF=2.02;TLOD=92.92	GT:AD:AF:DP:F1R2:F2R1:SB	0/1	25	30	0.535	55
Pre-Subject 1	chr11	110233396	110233396	T	G	RDX	Silent	NM_001260495	exon6	c.A387C	p.P129P	SNP	exonic	RDX	.	synonymous SNV	RDX:NM_001260495:exon6:c.A387C:p.P129P,RDX:NM_001260494:exon11:c.A1020C:p.P340P,RDX:NM_001260492:exon13:c.A1428C:p.P476P,RDX:NM_001260493:exon13:c.A1428C:p.P476P,RDX:NM_002906:exon13:c.A1428C:p.P476P	37	chr11	110233396	T	G	AS_SB_TABLE=17,18|0,2;DP=37;ECNT=4;MBQ=32,24;MFRL=186,220;MMQ=60,59;MPOS=24;POPAF=7.30;TLOD=4.58	GT:AD:AF:DP:F1R2:F2R1:SB	0/1	35	2	0.077	37
Pre-Subject 1	chr11	110233399	110233399	T	G	RDX	Silent	NM_001260495	exon6	c.A384C	p.P128P	SNP	exonic	RDX	.	synonymous SNV	RDX:NM_001260495:exon6:c.A384C:p.P128P,RDX:NM_001260494:exon11:c.A1017C:p.P339P,RDX:NM_001260492:exon13:c.A1425C:p.P475P,RDX:NM_001260493:exon13:c.A1425C:p.P475P,RDX:NM_002906:exon13:c.A1425C:p.P475P	33	chr11	110233399	T	G	AS_SB_TABLE=15,13|0,5;DP=37;ECNT=4;MBQ=32,14;MFRL=208,184;MMQ=60,60;MPOS=20;POPAF=7.30;TLOD=5.61	GT:AD:AF:DP:F1R2:F2R1:SB	0/1	28	5	0.136	33
Pre-Subject 1	chr11	110233402	110233402	T	G	RDX	Silent	NM_001260495	exon6	c.A381C	p.P127P	SNP	exonic	RDX	.	synonymous SNV	RDX:NM_001260495:exon6:c.A381C:p.P127P,RDX:NM_001260494:exon11:c.A1014C:p.P338P,RDX:NM_001260492:exon13:c.A1422C:p.P474P,RDX:NM_001260493:exon13:c.A1422C:p.P474P,RDX:NM_002906:exon13:c.A1422C:p.P474P	31	chr11	110233402	T	G	AS_SB_TABLE=13,12|0,6;DP=33;ECNT=4;MBQ=32,14;MFRL=206,207;MMQ=60,60;MPOS=24;POPAF=7.30;TLOD=6.20	GT:AD:AF:DP:F1R2:F2R1:SB	0/1	25	6	0.172	31
Pre-Subject 1	chr11	110233408	110233408	T	G	RDX	Silent	NM_001260495	exon6	c.A375C	p.P125P	SNP	exonic	RDX	.	synonymous SNV	RDX:NM_001260495:exon6:c.A375C:p.P125P,RDX:NM_001260494:exon11:c.A1008C:p.P336P,RDX:NM_001260492:exon13:c.A1416C:p.P472P,RDX:NM_001260493:exon13:c.A1416C:p.P472P,RDX:NM_002906:exon13:c.A1416C:p.P472P	27	chr11	110233408	T	G	AS_SB_TABLE=10,11|0,6;DP=28;ECNT=4;MBQ=32,14;MFRL=209,196;MMQ=60,60;MPOS=27;POPAF=7.30;TLOD=6.54	GT:AD:AF:DP:F1R2:F2R1:SB	0/1	21	6	0.201	27
Pre-Subject 1	chr11	111764842	111764842	C	T	PPP2R1B	Missense_Mutation	NM_001177562	exon3	c.G269A	p.G90D	SNP	exonic	PPP2R1B	.	nonsynonymous SNV	PPP2R1B:NM_001177562:exon3:c.G269A:p.G90D,PPP2R1B:NM_001177563:exon3:c.G269A:p.G90D,PPP2R1B:NM_002716:exon3:c.G269A:p.G90D,PPP2R1B:NM_181699:exon3:c.G269A:p.G90D	51	chr11	111764842	C	T	AS_SB_TABLE=14,19|5,13;DP=54;ECNT=1;MBQ=36,36;MFRL=186,169;MMQ=60,60;MPOS=26;POPAF=2.14;TLOD=55.37	GT:AD:AF:DP:F1R2:F2R1:SB	0/1	33	18	0.377	51
Pre-Subject 1	chr11	112228601	112228601	C	A	PTS	Missense_Mutation	NM_000317	exon2	c.C91A	p.L31I	SNP	exonic	PTS	.	nonsynonymous SNV	PTS:NM_000317:exon2:c.C91A:p.L31I	27	chr11	112228601	C	A	AS_SB_TABLE=16,5|6,0;DP=34;ECNT=3;MBQ=36,14;MFRL=200,180;MMQ=60,60;MPOS=30;POPAF=7.30;TLOD=7.74	GT:AD:AF:DP:F1R2:F2R1:SB	0/1	21	6	0.211	27
Pre-Subject 1	chr11	112228610	112228610	G	T	PTS	Nonsense_Mutation	NM_000317	exon2	c.G100T	p.E34X	SNP	exonic	PTS	.	stopgain	PTS:NM_000317:exon2:c.G100T:p.E34X	37	chr11	112228610	G	T	AS_SB_TABLE=28,6|3,0;DP=37;ECNT=3;MBQ=32,14;MFRL=215,188;MMQ=60,60;MPOS=23;POPAF=7.30;TLOD=3.86	GT:AD:AF:DP:F1R2:F2R1:SB	0/1	34	3	0.101	37
Pre-Subject 1	chr11	113932376	113932376	C	T	HTR3B	Silent	NM_001363563	exon4	c.C423T	p.V141V	SNP	exonic	HTR3B	.	synonymous SNV	HTR3B:NM_001363563:exon4:c.C423T:p.V141V,HTR3B:NM_006028:exon5:c.C456T:p.V152V	65	chr11	113932376	C	T	AS_SB_TABLE=15,35|5,10;DP=71;ECNT=1;MBQ=36,36;MFRL=189,194;MMQ=60,60;MPOS=20;POPAF=7.30;TLOD=38.82	GT:AD:AF:DP:F1R2:F2R1:SB	0/1	50	15	0.238	65
Pre-Subject 1	chr11	113986779	113986779	T	A	HTR3A	Missense_Mutation	NM_213621	exon7	c.T967A	p.S323T	SNP	exonic	HTR3A	.	nonsynonymous SNV	HTR3A:NM_213621:exon7:c.T967A:p.S323T	45	chr11	113986779	T	A	AS_SB_TABLE=2,28|15,0;DP=47;ECNT=1;MBQ=36,14;MFRL=193,187;MMQ=60,60;MPOS=9;POPAF=7.30;TLOD=9.24	GT:AD:AF:DP:F1R2:F2R1:SB	0/1	30	15	0.297	45
Pre-Subject 1	chr11	116821677	116821677	G	T	APOA4	Missense_Mutation	NM_000482	exon3	c.C381A	p.N127K	SNP	exonic	APOA4	.	nonsynonymous SNV	APOA4:NM_000482:exon3:c.C381A:p.N127K	54	chr11	116821677	G	T	AS_SB_TABLE=13,9|17,15;DP=56;ECNT=1;MBQ=36,36;MFRL=205,188;MMQ=60,60;MPOS=20;POPAF=2.51;TLOD=108.35	GT:AD:AF:DP:F1R2:F2R1:SB	0/1	22	32	0.605	54
Pre-Subject 1	chr11	117098245	117098245	T	G	SIK3	Silent	NM_001281749	exon1	c.A171C	p.G57G	SNP	exonic	SIK3	.	synonymous SNV	SIK3:NM_001281749:exon1:c.A171C:p.G57G,SIK3:NM_001366686:exon1:c.A171C:p.G57G,SIK3:NM_001366687:exon1:c.A171C:p.G57G,SIK3:NM_025164:exon1:c.A171C:p.G57G	34	chr11	117098245	T	G	AS_SB_TABLE=3,22|0,9;DP=39;ECNT=1;MBQ=32,14;MFRL=154,196;MMQ=60,60;MPOS=20;POPAF=7.30;TLOD=8.05	GT:AD:AF:DP:F1R2:F2R1:SB	0/1	25	9	0.242	34
Pre-Subject 1	chr11	117282120	117282120	A	C	RNF214	Missense_Mutation	NM_001077239	exon11	c.A1562C	p.H521P	SNP	exonic	RNF214	.	nonsynonymous SNV	RNF214:NM_001077239:exon11:c.A1562C:p.H521P,RNF214:NM_001278249:exon11:c.A1097C:p.H366P,RNF214:NM_207343:exon11:c.A1562C:p.H521P	22	chr11	117282120	A	C	AS_SB_TABLE=5,13|4,0;DP=23;ECNT=1;MBQ=34,30;MFRL=186,267;MMQ=60,60;MPOS=20;POPAF=7.30;TLOD=7.11	GT:AD:AF:DP:F1R2:F2R1:SB	0/1	18	4	0.194	22
Pre-Subject 1	chr11	117461580	117461580	A	C	DSCAML1	Silent	NM_020693	exon18	c.T3282G	p.P1094P	SNP	exonic	DSCAML1	.	synonymous SNV	DSCAML1:NM_020693:exon18:c.T3282G:p.P1094P	23	chr11	117461580	A	C	AS_SB_TABLE=7,14|0,2;DP=24;ECNT=4;MBQ=36,14;MFRL=243,191;MMQ=60,60;MPOS=18;POPAF=7.30;TLOD=4.84	GT:AD:AF:DP:F1R2:F2R1:PGT:PID:PS:SB	0|1	21	2	0.12	23
Pre-Subject 1	chr11	117461587	117461587	T	G	DSCAML1	Missense_Mutation	NM_020693	exon18	c.A3275C	p.Q1092P	SNP	exonic	DSCAML1	.	nonsynonymous SNV	DSCAML1:NM_020693:exon18:c.A3275C:p.Q1092P	21	chr11	117461587	T	G	AS_SB_TABLE=7,12|0,2;DP=21;ECNT=4;MBQ=36,21;MFRL=242,191;MMQ=60,60;MPOS=25;POPAF=7.30;TLOD=4.96	GT:AD:AF:DP:F1R2:F2R1:PGT:PID:PS:SB	0|1	19	2	0.13	21
Pre-Subject 1	chr11	118544936	118544936	C	A	IFT46	Nonsense_Mutation	NM_001168618	exon12	c.G895T	p.E299X	SNP	exonic	IFT46	.	stopgain	IFT46:NM_001168618:exon12:c.G895T:p.E299X,IFT46:NM_020153:exon13:c.G1048T:p.E350X	42	chr11	118544936	C	A	AS_SB_TABLE=13,8|7,14;DP=42;ECNT=1;MBQ=36,36;MFRL=155,233;MMQ=60,60;MPOS=19;POPAF=7.30;TLOD=71.27	GT:AD:AF:DP:F1R2:F2R1:SB	0/1	21	21	0.526	42
Pre-Subject 1	chr11	118900151	118900151	C	T	BCL9L	Missense_Mutation	NM_182557	exon7	c.G3172A	p.A1058T	SNP	exonic	BCL9L	.	nonsynonymous SNV	BCL9L:NM_182557:exon7:c.G3172A:p.A1058T	23	chr11	118900151	C	T	AS_SB_TABLE=14,7|1,1;DP=26;ECNT=1;MBQ=36,36;MFRL=179,159;MMQ=60,60;MPOS=22;POPAF=7.30;TLOD=4.53	GT:AD:AF:DP:F1R2:F2R1:SB	0/1	21	2	0.111	23
Pre-Subject 1	chr11	118902890	118902890	-	GGGGGGGGGGGGGG	BCL9L	Frame_Shift_Ins	NM_182557	exon6	c.852_853insCCCCCCCCCCCCCC	p.T285Pfs*12	INS	exonic	BCL9L	.	frameshift insertion	BCL9L:NM_182557:exon6:c.852_853insCCCCCCCCCCCCCC:p.T285Pfs*12	37	chr11	118902890	T	TGGGGGGGGGGGGGG	AS_SB_TABLE=31,3|0,3;DP=41;ECNT=1;MBQ=36,14;MFRL=223,199;MMQ=60,60;MPOS=4;POPAF=7.30;RPA=6,20;RU=G;STR;TLOD=4.61	GT:AD:AF:DP:F1R2:F2R1:SB	0/1	34	3	0.094	37
Pre-Subject 1	chr11	119068169	119068169	A	G	VPS11	Missense_Mutation	NM_001290185	exon1	c.A101G	p.H34R	SNP	exonic	VPS11	.	nonsynonymous SNV	VPS11:NM_001290185:exon1:c.A101G:p.H34R	77	chr11	119068169	A	G	AS_SB_TABLE=17,33|4,23;DP=77;ECNT=2;MBQ=36,36;MFRL=197,180;MMQ=60,60;MPOS=17;PON;POPAF=0.387;TLOD=99.99	GT:AD:AF:DP:F1R2:F2R1:PGT:PID:PS:SB	0|1	50	27	0.347	77
Pre-Subject 1	chr11	119068171	119068171	C	T	VPS11	Missense_Mutation	NM_001290185	exon1	c.C103T	p.L35F	SNP	exonic	VPS11	.	nonsynonymous SNV	VPS11:NM_001290185:exon1:c.C103T:p.L35F	77	chr11	119068171	C	T	AS_SB_TABLE=17,33|4,23;DP=79;ECNT=2;MBQ=36,36;MFRL=197,180;MMQ=60,60;MPOS=16;PON;POPAF=0.069;TLOD=99.98	GT:AD:AF:DP:F1R2:F2R1:PGT:PID:PS:SB	0|1	50	27	0.347	77
Pre-Subject 1	chr11	120476674	120476674	A	G	ARHGEF12	Silent	NM_001198665	exon33	c.A3234G	p.L1078L	SNP	exonic	ARHGEF12	.	synonymous SNV	ARHGEF12:NM_001198665:exon33:c.A3234G:p.L1078L,ARHGEF12:NM_001301084:exon34:c.A2982G:p.L994L,ARHGEF12:NM_015313:exon34:c.A3291G:p.L1097L	67	chr11	120476674	A	G	AS_SB_TABLE=19,10|20,18;DP=69;ECNT=1;MBQ=36,36;MFRL=183,200;MMQ=60,60;MPOS=18;POPAF=7.30;TLOD=133.20	GT:AD:AF:DP:F1R2:F2R1:SB	0/1	29	38	0.565	67
Pre-Subject 1	chr11	121496917	121496917	T	C	SORL1	Silent	NM_003105	exon6	c.T807C	p.H269H	SNP	exonic	SORL1	.	synonymous SNV	SORL1:NM_003105:exon6:c.T807C:p.H269H	37	chr11	121496917	T	C	AS_SB_TABLE=12,3|20,2;DP=41;ECNT=1;MBQ=36,36;MFRL=199,224;MMQ=60,60;MPOS=24;PON;POPAF=0.302;TLOD=74.41	GT:AD:AF:DP:F1R2:F2R1:SB	0/1	15	22	0.612	37
Pre-Subject 1	chr11	122956565	122956565	A	G	JHY	Missense_Mutation	NM_001363088	exon6	c.A1885G	p.I629V	SNP	exonic	JHY	.	nonsynonymous SNV	JHY:NM_001363088:exon6:c.A1885G:p.I629V,JHY:NM_001363089:exon7:c.A1999G:p.I667V,JHY:NM_024806:exon7:c.A1999G:p.I667V	35	chr11	122956565	A	G	AS_SB_TABLE=2,17|5,11;DP=35;ECNT=1;MBQ=36,36;MFRL=176,176;MMQ=60,60;MPOS=16;POPAF=7.30;TLOD=46.44	GT:AD:AF:DP:F1R2:F2R1:SB	0/1	19	16	0.429	35
Pre-Subject 1	chr11	124023846	124023846	G	A	OR10G9	Silent	NM_001001953	exon1	c.G834A	p.L278L	SNP	exonic	OR10G9	.	synonymous SNV	OR10G9:NM_001001953:exon1:c.G834A:p.L278L	117	chr11	124023846	G	A	AS_SB_TABLE=25,30|26,36;DP=119;ECNT=2;MBQ=36,36;MFRL=194,187;MMQ=60,43;MPOS=16;PON;POPAF=1.15;TLOD=245.28	GT:AD:AF:DP:F1R2:F2R1:PGT:PID:PS:SB	0|1	55	62	0.539	117
Pre-Subject 1	chr11	124023849	124023849	A	G	OR10G9	Silent	NM_001001953	exon1	c.A837G	p.T279T	SNP	exonic	OR10G9	.	synonymous SNV	OR10G9:NM_001001953:exon1:c.A837G:p.T279T	119	chr11	124023849	A	G	AS_SB_TABLE=26,30|26,37;DP=121;ECNT=2;MBQ=36,36;MFRL=195,186;MMQ=60,43;MPOS=13;PON;POPAF=0.979;TLOD=244.94	GT:AD:AF:DP:F1R2:F2R1:PGT:PID:PS:SB	0|1	56	63	0.534	119
Pre-Subject 1	chr11	124225542	124225542	A	G	OR8G2P	Missense_Mutation	NM_001291438	exon1	c.A850G	p.R284G	SNP	exonic	OR8G2P	.	nonsynonymous SNV	OR8G2P:NM_001291438:exon1:c.A850G:p.R284G	72	chr11	124225542	A	G	AS_SB_TABLE=20,16|17,19;DP=74;ECNT=3;MBQ=36,36;MFRL=211,212;MMQ=40,40;MPOS=16;PON;POPAF=7.30;TLOD=100.87	GT:AD:AF:DP:F1R2:F2R1:SB	0/1	36	36	0.491	72
Pre-Subject 1	chr11	124225570	124225570	C	T	OR8G2P	Missense_Mutation	NM_001291438	exon1	c.C878T	p.T293I	SNP	exonic	OR8G2P	.	nonsynonymous SNV	OR8G2P:NM_001291438:exon1:c.C878T:p.T293I	74	chr11	124225570	C	T	AS_SB_TABLE=0,0|27,47;DP=76;ECNT=3;MBQ=0,36;MFRL=0,208;MMQ=60,60;MPOS=20;PON;POPAF=7.30;TLOD=320.00	GT:AD:AF:DP:F1R2:F2R1:PGT:PID:PS:SB	0|1	0	74	0.987	74
Pre-Subject 1	chr11	124225572	124225572	A	G	OR8G2P	Missense_Mutation	NM_001291438	exon1	c.A880G	p.I294V	SNP	exonic	OR8G2P	.	nonsynonymous SNV	OR8G2P:NM_001291438:exon1:c.A880G:p.I294V	74	chr11	124225572	A	G	AS_SB_TABLE=0,0|27,47;DP=74;ECNT=3;MBQ=0,36;MFRL=0,208;MMQ=60,60;MPOS=22;PON;POPAF=7.30;TLOD=320.00	GT:AD:AF:DP:F1R2:F2R1:PGT:PID:PS:SB	0|1	0	74	0.987	74
Pre-Subject 1	chr11	124265585	124265585	C	T	OR8G5	Silent	NM_001005198	exon1	c.C759T	p.Y253Y	SNP	exonic	OR8G5	.	synonymous SNV	OR8G5:NM_001005198:exon1:c.C759T:p.Y253Y	42	chr11	124265585	C	T	AS_SB_TABLE=9,10|11,12;DP=43;ECNT=2;MBQ=36,36;MFRL=275,288;MMQ=60,60;MPOS=18;PON;POPAF=0.301;TLOD=74.04	GT:AD:AF:DP:F1R2:F2R1:SB	0/1	19	23	0.544	42
Pre-Subject 1	chr11	124265620	124265620	A	C	OR8G5	Missense_Mutation	NM_001005198	exon1	c.A794C	p.Y265S	SNP	exonic	OR8G5	.	nonsynonymous SNV	OR8G5:NM_001005198:exon1:c.A794C:p.Y265S	45	chr11	124265620	A	C	AS_SB_TABLE=14,8|14,9;DP=49;ECNT=2;MBQ=36,36;MFRL=241,232;MMQ=60,46;MPOS=17;POPAF=1.72;TLOD=74.05	GT:AD:AF:DP:F1R2:F2R1:SB	0/1	22	23	0.502	45
Pre-Subject 1	chr11	124879297	124879297	A	C	ROBO3	Missense_Mutation	NM_001370361	exon6	c.A788C	p.H263P	SNP	exonic	ROBO3	.	nonsynonymous SNV	ROBO3:NM_001370361:exon6:c.A788C:p.H263P,ROBO3:NM_001370366:exon6:c.A593C:p.H198P,ROBO3:NM_001370358:exon7:c.A788C:p.H263P,ROBO3:NM_001370359:exon7:c.A788C:p.H263P,ROBO3:NM_001370364:exon7:c.A593C:p.H198P,ROBO3:NM_001370356:exon8:c.A788C:p.H263P,ROBO3:NM_001370357:exon8:c.A788C:p.H263P,ROBO3:NM_022370:exon24:c.A3641C:p.H1214P	28	chr11	124879297	A	C	AS_SB_TABLE=13,5|10,0;DP=31;ECNT=1;MBQ=14,14;MFRL=208,224;MMQ=60,60;MPOS=21;POPAF=4.61;TLOD=5.74	GT:AD:AF:DP:F1R2:F2R1:SB	0/1	18	10	0.333	28
Pre-Subject 1	chr11	124880552	124880557	CGGAGT	-	ROBO3	In_Frame_Del	NM_001370361	exon9	c.1240_1245del	p.R416_S417del	DEL	exonic	ROBO3	.	nonframeshift deletion	ROBO3:NM_001370361:exon9:c.1240_1245del:p.R416_S417del,ROBO3:NM_001370366:exon9:c.1045_1050del:p.R351_S352del,ROBO3:NM_001370358:exon10:c.1240_1245del:p.R416_S417del,ROBO3:NM_001370359:exon10:c.1240_1245del:p.R416_S417del,ROBO3:NM_001370364:exon10:c.1045_1050del:p.R351_S352del,ROBO3:NM_001370356:exon11:c.1240_1245del:p.R416_S417del,ROBO3:NM_001370357:exon11:c.1240_1245del:p.R416_S417del,ROBO3:NM_…	27	chr11	124880551	CCGGAGT	C	AS_SB_TABLE=1,12|2,12;DP=29;ECNT=1;MBQ=36,36;MFRL=227,186;MMQ=60,60;MPOS=22;PON;POPAF=0.463;RPA=2,1;RU=CGGAGT;STR;TLOD=52.09	GT:AD:AF:DP:F1R2:F2R1:SB	0/1	13	14	0.528	27
Pre-Subject 1	chr11	125038456	125038456	T	C	CCDC15	Missense_Mutation	NM_025004	exon14	c.T2437C	p.C813R	SNP	exonic	CCDC15	.	nonsynonymous SNV	CCDC15:NM_025004:exon14:c.T2437C:p.C813R	11	chr11	125038456	T	C	AS_SB_TABLE=9,0|2,0;DP=11;ECNT=1;MBQ=36,36;MFRL=211,162;MMQ=60,60;MPOS=23;PON;POPAF=7.30;TLOD=5.58	GT:AD:AF:DP:F1R2:F2R1:SB	0/1	9	2	0.231	11
Pre-Subject 1	chr11	125351371	125351371	A	C	PKNOX2	Silent	NM_022062	exon4	c.A66C	p.P22P	SNP	exonic	PKNOX2	.	synonymous SNV	PKNOX2:NM_022062:exon4:c.A66C:p.P22P	26	chr11	125351371	A	C	AS_SB_TABLE=1,19|6,0;DP=26;ECNT=2;MBQ=36,21;MFRL=178,194;MMQ=60,60;MPOS=13;POPAF=7.30;TLOD=10.64	GT:AD:AF:DP:F1R2:F2R1:PGT:PID:PS:SB	0|1	20	6	0.208	26
Pre-Subject 1	chr11	125351382	125351382	A	C	PKNOX2	Missense_Mutation	NM_022062	exon4	c.A77C	p.D26A	SNP	exonic	PKNOX2	.	nonsynonymous SNV	PKNOX2:NM_022062:exon4:c.A77C:p.D26A	27	chr11	125351382	A	C	AS_SB_TABLE=2,22|3,0;DP=27;ECNT=2;MBQ=36,14;MFRL=178,211;MMQ=60,60;MPOS=29;POPAF=7.30;TLOD=9.28	GT:AD:AF:DP:F1R2:F2R1:PGT:PID:PS:SB	0|1	24	3	0.168	27
Pre-Subject 1	chr11	125495476	125495476	C	G	LOC403312	Missense_Mutation	NM_001301851	exon1	c.C148G	p.R50G	SNP	exonic	LOC403312	.	nonsynonymous SNV	LOC403312:NM_001301851:exon1:c.C148G:p.R50G	46	chr11	125495476	C	G	AS_SB_TABLE=14,16|6,10;DP=47;ECNT=1;MBQ=36,36;MFRL=170,195;MMQ=60,60;MPOS=18;POPAF=7.30;TLOD=43.62	GT:AD:AF:DP:F1R2:F2R1:SB	0/1	30	16	0.338	46
Pre-Subject 1	chr11	125495610	125495610	T	G	LOC403312	Silent	NM_001301851	exon1	c.T282G	p.G94G	SNP	exonic	LOC403312	.	synonymous SNV	LOC403312:NM_001301851:exon1:c.T282G:p.G94G	23	chr11	125495610	T	G	AS_SB_TABLE=3,15|0,5;DP=24;ECNT=1;MBQ=14,14;MFRL=171,162;MMQ=60,60;MPOS=22;POPAF=7.30;TLOD=3.11	GT:AD:AF:DP:F1R2:F2R1:SB	0/1	18	5	0.196	23
Pre-Subject 1	chr11	125677870	125677870	C	A	ACRV1	Silent	NM_001612	exon2	c.G480T	p.S160S	SNP	exonic	ACRV1	.	synonymous SNV	ACRV1:NM_001612:exon2:c.G480T:p.S160S,ACRV1:NM_020069:exon2:c.G480T:p.S160S,ACRV1:NM_020107:exon3:c.G315T:p.S105S,ACRV1:NM_020108:exon3:c.G270T:p.S90S	76	chr11	125677870	C	A	AS_SB_TABLE=37,31|8,0;DP=86;ECNT=1;MBQ=32,14;MFRL=184,231;MMQ=60,60;MPOS=23;POPAF=7.30;TLOD=4.19	GT:AD:AF:DP:F1R2:F2R1:SB	0/1	68	8	0.07	76
Pre-Subject 1	chr11	125951971	125951971	G	T	VSIG10L2	Missense_Mutation	NM_001365077	exon6	c.G1393T	p.V465F	SNP	exonic	VSIG10L2	.	nonsynonymous SNV	VSIG10L2:NM_001365077:exon6:c.G1393T:p.V465F	37	chr11	125951971	G	T	AS_SB_TABLE=16,7|7,7;DP=39;ECNT=1;MBQ=36,36;MFRL=172,169;MMQ=60,60;MPOS=25;POPAF=2.67;TLOD=41.70	GT:AD:AF:DP:F1R2:F2R1:SB	0/1	23	14	0.378	37
Pre-Subject 1	chr11	130199068	130199068	C	T	ST14	Silent	NM_021978	exon15	c.C1806T	p.C602C	SNP	exonic	ST14	.	synonymous SNV	ST14:NM_021978:exon15:c.C1806T:p.C602C	29	chr11	130199068	C	T	AS_SB_TABLE=4,23|0,2;DP=30;ECNT=1;MBQ=36,36;MFRL=208,181;MMQ=60,60;MPOS=10;POPAF=3.83;TLOD=4.16	GT:AD:AF:DP:F1R2:F2R1:SB	0/1	27	2	0.103	29
Pre-Subject 1	chr11	130449634	130449634	G	T	ADAMTS15	Nonsense_Mutation	NM_139055	exon1	c.G661T	p.E221X	SNP	exonic	ADAMTS15	.	stopgain	ADAMTS15:NM_139055:exon1:c.G661T:p.E221X	58	chr11	130449634	G	T	AS_SB_TABLE=20,33|5,0;DP=60;ECNT=6;MBQ=36,32;MFRL=191,155;MMQ=60,60;MPOS=14;POPAF=3.83;TLOD=9.10	GT:AD:AF:DP:F1R2:F2R1:PGT:PID:PS:SB	0|1	53	5	0.079	58
Pre-Subject 1	chr11	130449638	130449641	CGCT	-	ADAMTS15	Frame_Shift_Del	NM_139055	exon1	c.665_668del	p.T222Rfs*21	DEL	exonic	ADAMTS15	.	frameshift deletion	ADAMTS15:NM_139055:exon1:c.665_668del:p.T222Rfs*21	61	chr11	130449637	ACGCT	A	AS_SB_TABLE=23,34|4,0;DP=61;ECNT=6;MBQ=36,14;MFRL=191,150;MMQ=60,60;MPOS=23;POPAF=3.83;TLOD=9.00	GT:AD:AF:DP:F1R2:F2R1:PGT:PID:PS:SB	0|1	57	4	0.075	61
Pre-Subject 1	chr11	130449651	130449653	GGA	-	ADAMTS15	In_Frame_Del	NM_139055	exon1	c.678_680del	p.D227del	DEL	exonic	ADAMTS15	.	nonframeshift deletion	ADAMTS15:NM_139055:exon1:c.678_680del:p.D227del	63	chr11	130449650	CGGA	C	AS_SB_TABLE=28,32|3,0;DP=63;ECNT=6;MBQ=36,14;MFRL=188,145;MMQ=60,60;MPOS=30;POPAF=4.01;TLOD=8.96	GT:AD:AF:DP:F1R2:F2R1:PGT:PID:PS:SB	0|1	60	3	0.074	63
Pre-Subject 1	chr11	130449657	130449657	G	A	ADAMTS15	Silent	NM_139055	exon1	c.G684A	p.E228E	SNP	exonic	ADAMTS15	.	synonymous SNV	ADAMTS15:NM_139055:exon1:c.G684A:p.E228E	63	chr11	130449657	G	A	AS_SB_TABLE=29,31|3,0;DP=63;ECNT=6;MBQ=36,14;MFRL=188,145;MMQ=60,60;MPOS=30;POPAF=4.01;TLOD=9.00	GT:AD:AF:DP:F1R2:F2R1:PGT:PID:PS:SB	0|1	60	3	0.075	63
Pre-Subject 1	chr11	130449659	130449659	C	-	ADAMTS15	Nonsense_Mutation	NM_139055	exon1	c.686delC	p.S229*	SNP	exonic	ADAMTS15	.	stopgain	ADAMTS15:NM_139055:exon1:c.686delC:p.S229*	65	chr11	130449658	TC	T	AS_SB_TABLE=29,33|3,0;DP=65;ECNT=6;MBQ=36,32;MFRL=188,145;MMQ=60,60;MPOS=29;POPAF=7.30;TLOD=8.96	GT:AD:AF:DP:F1R2:F2R1:PGT:PID:PS:SB	0|1	62	3	0.074	65
Pre-Subject 1	chr11	130449663	130449666	GGTC	-	ADAMTS15	Frame_Shift_Del	NM_139055	exon1	c.690_693del	p.M230Ifs*13	DEL	exonic	ADAMTS15	.	frameshift deletion	ADAMTS15:NM_139055:exon1:c.690_693del:p.M230Ifs*13	64	chr11	130449662	TGGTC	T	AS_SB_TABLE=29,32|3,0;DP=68;ECNT=6;MBQ=36,14;MFRL=192,145;MMQ=60,60;MPOS=26;POPAF=7.30;TLOD=8.99	GT:AD:AF:DP:F1R2:F2R1:PGT:PID:PS:SB	0|1	61	3	0.075	64
Pre-Subject 1	chr11	133931502	133931502	A	T	IGSF9B	Missense_Mutation	NM_001277285	exon10	c.T1319A	p.I440N	SNP	exonic	IGSF9B	.	nonsynonymous SNV	IGSF9B:NM_001277285:exon10:c.T1319A:p.I440N	54	chr11	133931502	A	T	AS_SB_TABLE=37,15|1,1;DP=54;ECNT=1;MBQ=36,36;MFRL=193,170;MMQ=60,60;MPOS=28;POPAF=7.30;TLOD=3.33	GT:AD:AF:DP:F1R2:F2R1:SB	0/1	52	2	0.056	54
Pre-Subject 1	chr11	134259647	134259647	G	A	ACAD8	Missense_Mutation	NM_014384	exon6	c.G607A	p.V203I	SNP	exonic	ACAD8	.	nonsynonymous SNV	ACAD8:NM_014384:exon6:c.G607A:p.V203I	18	chr11	134259647	G	A	AS_SB_TABLE=8,2|7,1;DP=19;ECNT=1;MBQ=36,36;MFRL=192,208;MMQ=60,60;MPOS=12;POPAF=3.83;TLOD=26.18	GT:AD:AF:DP:F1R2:F2R1:SB	0/1	10	8	0.478	18
Pre-Subject 1	chr11	134318879	134318879	C	T	GLB1L3	Silent	NM_001080407	exon20	c.C1899T	p.V633V	SNP	exonic	GLB1L3	.	synonymous SNV	GLB1L3:NM_001080407:exon20:c.C1899T:p.V633V	71	chr11	134318879	C	T	AS_SB_TABLE=9,25|11,26;DP=72;ECNT=2;MBQ=36,36;MFRL=223,217;MMQ=60,60;MPOS=13;POPAF=7.30;TLOD=120.46	GT:AD:AF:DP:F1R2:F2R1:SB	0/1	34	37	0.516	71
Pre-Subject 1	chr12	174892	174892	T	C	IQSEC3	Silent	NM_001170738	exon14	c.T3408C	p.G1136G	SNP	exonic	IQSEC3	.	synonymous SNV	IQSEC3:NM_001170738:exon14:c.T3408C:p.G1136G	26	chr12	174892	T	C	AS_SB_TABLE=0,0|6,20;DP=28;ECNT=2;MBQ=0,36;MFRL=0,159;MMQ=60,60;MPOS=24;PON;POPAF=0.022;TLOD=96.00	GT:AD:AF:DP:F1R2:F2R1:SB	0/1	0	26	0.963	26
Pre-Subject 1	chr12	226398	226398	G	A	SLC6A13	Missense_Mutation	NM_001190997	exon7	c.C776T	p.A259V	SNP	exonic	SLC6A13	.	nonsynonymous SNV	SLC6A13:NM_001190997:exon7:c.C776T:p.A259V,SLC6A13:NM_016615:exon9:c.C1052T:p.A351V	24	chr12	226398	G	A	AS_SB_TABLE=9,13|0,2;DP=24;ECNT=1;MBQ=36,36;MFRL=215,204;MMQ=60,60;MPOS=11;POPAF=7.30;TLOD=4.32	GT:AD:AF:DP:F1R2:F2R1:SB	0/1	22	2	0.115	24
Pre-Subject 1	chr12	1952518	1952518	G	A	DCP1B	Silent	NM_152640	exon7	c.C1422T	p.A474A	SNP	exonic	DCP1B	.	synonymous SNV	DCP1B:NM_152640:exon7:c.C1422T:p.A474A	46	chr12	1952518	G	A	AS_SB_TABLE=17,9|16,4;DP=48;ECNT=1;MBQ=36,36;MFRL=202,223;MMQ=60,60;MPOS=20;POPAF=4.61;TLOD=58.48	GT:AD:AF:DP:F1R2:F2R1:SB	0/1	26	20	0.432	46
Pre-Subject 1	chr12	1953157	1953157	-	TGC	DCP1B	In_Frame_Ins	NM_152640	exon7	c.782_783insGCA	p.Q261_E262insQ	INS	exonic	DCP1B	.	nonframeshift insertion	DCP1B:NM_152640:exon7:c.782_783insGCA:p.Q261_E262insQ	38	chr12	1953157	T	TTGC	AS_SB_TABLE=3,0|19,16;DP=59;ECNT=1;MBQ=36,36;MFRL=177,196;MMQ=60,60;MPOS=14;PON;POPAF=3.83;RPA=9,10;RU=TGC;STR;TLOD=144.39	GT:AD:AF:DP:F1R2:F2R1:SB	0/1	3	35	0.906	38
Pre-Subject 1	chr12	4590429	4590429	C	A	DYRK4	Missense_Mutation	NM_001371301	exon4	c.C313A	p.L105M	SNP	exonic	DYRK4	.	nonsynonymous SNV	DYRK4:NM_001371301:exon4:c.C313A:p.L105M	53	chr12	4590429	C	A	AS_SB_TABLE=12,39|0,2;DP=53;ECNT=1;MBQ=36,36;MFRL=202,220;MMQ=60,60;MPOS=35;POPAF=7.30;TLOD=3.28	GT:AD:AF:DP:F1R2:F2R1:SB	0/1	51	2	0.054	53
Pre-Subject 1	chr12	4626799	4626799	-	C	AKAP3	Frame_Shift_Ins	NM_001278309	exon5	c.2102dupG	p.D702Rfs*4	SNP	exonic	AKAP3	.	frameshift insertion	AKAP3:NM_001278309:exon5:c.2102dupG:p.D702Rfs*4,AKAP3:NM_006422:exon5:c.2102dupG:p.D702Rfs*4	46	chr12	4626799	T	TC	AS_SB_TABLE=7,10|18,11;DP=48;ECNT=2;MBQ=36,36;MFRL=222,256;MMQ=60,60;MPOS=21;PON;POPAF=0.924;RPA=2,3;RU=C;STR;TLOD=114.94	GT:AD:AF:DP:F1R2:F2R1:PGT:PID:PS:SB	0|1	17	29	0.626	46
Pre-Subject 1	chr12	4626804	4626804	A	-	AKAP3	Frame_Shift_Del	NM_001278309	exon5	c.2098delT	p.S700Lfs*7	SNP	exonic	AKAP3	.	frameshift deletion	AKAP3:NM_001278309:exon5:c.2098delT:p.S700Lfs*7,AKAP3:NM_006422:exon5:c.2098delT:p.S700Lfs*7	50	chr12	4626803	GA	G	AS_SB_TABLE=8,12|19,11;DP=50;ECNT=2;MBQ=36,36;MFRL=222,252;MMQ=60,60;MPOS=22;PON;POPAF=0.924;TLOD=117.41	GT:AD:AF:DP:F1R2:F2R1:PGT:PID:PS:SB	0|1	20	30	0.608	50
Pre-Subject 1	chr12	4626959	4626959	C	T	AKAP3	Missense_Mutation	NM_001278309	exon5	c.G1943A	p.G648D	SNP	exonic	AKAP3	.	nonsynonymous SNV	AKAP3:NM_001278309:exon5:c.G1943A:p.G648D,AKAP3:NM_006422:exon5:c.G1943A:p.G648D	40	chr12	4626959	C	T	AS_SB_TABLE=14,9|13,4;DP=46;ECNT=1;MBQ=36,36;MFRL=206,203;MMQ=60,60;MPOS=18;POPAF=4.61;TLOD=46.93	GT:AD:AF:DP:F1R2:F2R1:SB	0/1	23	17	0.411	40
Pre-Subject 1	chr12	4810101	4810101	A	G	KCNA6	Silent	NM_002235	exon1	c.A60G	p.G20G	SNP	exonic	KCNA6	.	synonymous SNV	KCNA6:NM_002235:exon1:c.A60G:p.G20G	49	chr12	4810101	A	G	AS_SB_TABLE=9,16|12,12;DP=51;ECNT=1;MBQ=36,36;MFRL=185,189;MMQ=60,60;MPOS=16;PON;POPAF=0.376;TLOD=75.35	GT:AD:AF:DP:F1R2:F2R1:SB	0/1	25	24	0.478	49
Pre-Subject 1	chr12	4810657	4810657	G	C	KCNA6	Missense_Mutation	NM_002235	exon1	c.G616C	p.G206R	SNP	exonic	KCNA6	.	nonsynonymous SNV	KCNA6:NM_002235:exon1:c.G616C:p.G206R	93	chr12	4810657	G	C	AS_SB_TABLE=32,58|3,0;DP=93;ECNT=3;MBQ=36,21;MFRL=189,248;MMQ=60,60;MPOS=26;POPAF=7.30;TLOD=3.55	GT:AD:AF:DP:F1R2:F2R1:SB	0/1	90	3	0.035	93
Pre-Subject 1	chr12	4810676	4810676	G	A	KCNA6	Missense_Mutation	NM_002235	exon1	c.G635A	p.S212N	SNP	exonic	KCNA6	.	nonsynonymous SNV	KCNA6:NM_002235:exon1:c.G635A:p.S212N	89	chr12	4810676	G	A	AS_SB_TABLE=28,58|3,0;DP=90;ECNT=3;MBQ=36,23;MFRL=198,248;MMQ=60,60;MPOS=25;POPAF=7.30;TLOD=3.73	GT:AD:AF:DP:F1R2:F2R1:SB	0/1	86	3	0.035	89
Pre-Subject 1	chr12	5045296	5045296	T	C	KCNA5	Silent	NM_002234	exon1	c.T1149C	p.G383G	SNP	exonic	KCNA5	.	synonymous SNV	KCNA5:NM_002234:exon1:c.T1149C:p.G383G	41	chr12	5045296	T	C	AS_SB_TABLE=0,0|5,36;DP=44;ECNT=1;MBQ=0,36;MFRL=0,209;MMQ=60,60;MPOS=10;PON;POPAF=5.683e-03;TLOD=155.79	GT:AD:AF:DP:F1R2:F2R1:SB	0/1	0	41	0.977	41
Pre-Subject 1	chr12	6023662	6023662	C	A	VWF	Missense_Mutation	NM_000552	exon25	c.G3348T	p.K1116N	SNP	exonic	VWF	.	nonsynonymous SNV	VWF:NM_000552:exon25:c.G3348T:p.K1116N	19	chr12	6023662	C	A	AS_SB_TABLE=5,12|0,2;DP=20;ECNT=1;MBQ=32,29;MFRL=175,163;MMQ=43,60;MPOS=13;POPAF=7.30;TLOD=3.27	GT:AD:AF:DP:F1R2:F2R1:SB	0/1	17	2	0.157	19
Pre-Subject 1	chr12	6121298	6121298	C	T	VWF	Silent	NM_000552	exon3	c.G96A	p.T32T	SNP	exonic	VWF	.	synonymous SNV	VWF:NM_000552:exon3:c.G96A:p.T32T	53	chr12	6121298	C	T	AS_SB_TABLE=6,22|7,18;DP=54;ECNT=1;MBQ=36,36;MFRL=184,200;MMQ=60,60;MPOS=16;POPAF=3.83;TLOD=75.79	GT:AD:AF:DP:F1R2:F2R1:SB	0/1	28	25	0.47	53
Pre-Subject 1	chr12	6348024	6348024	T	G	SCNN1A	Missense_Mutation	NM_001159576	exon12	c.A2036C	p.H679P	SNP	exonic	SCNN1A	.	nonsynonymous SNV	SCNN1A:NM_001159576:exon12:c.A2036C:p.H679P,SCNN1A:NM_001038:exon13:c.A1859C:p.H620P,SCNN1A:NM_001159575:exon13:c.A1928C:p.H643P	70	chr12	6348024	T	G	AS_SB_TABLE=50,12|0,8;DP=73;ECNT=3;MBQ=36,14;MFRL=203,161;MMQ=60,60;MPOS=3;POPAF=7.30;TLOD=11.28	GT:AD:AF:DP:F1R2:F2R1:SB	0/1	62	8	0.094	70
[truncated: 122,444 more rows]

## Sheet: Table S4 Filtered WES results
Patient_ID	Chromosome	Start_Position	End_Position	Reference_Allele	Tumor_Seq_Allele2	Hugo_Symbol	Variant_Classification	Classification_Number	tx	exon	txChange	aaChange	Variant_Type	Func.refGene	Gene.refGene	ExonicFunc.refGene	AAChange.refGene	DP	#CHROM	POS	REF	ALT	PON INFO	FORMAT	GENOTYPE	Reference_Reads	Alternate_Reads	Alternate_Allele_Frequency		READ DEPTH
[truncated: 100 more rows]

[truncated: 4 more sheets: Table S5 IHC scores, Table S6 FACS panel, Table S7 FACS rGMFI data, Table S8 Representativeness ]
