# Supplementary figures and images for: A Phase II Trial of Guadecitabine plus Atezolizumab in Metastatic Urothelial Carcinoma Progressing after Initial Immune Checkpoint Inhibitor Therapy
Source: Oxford University Press journal article supplement (doi:10.1158/1078-0432.ccr-22-3642), 2023-03-16

**
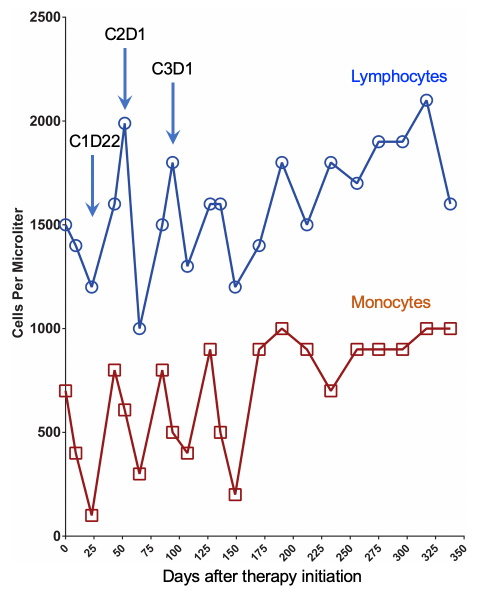
**

**Supplementary Figure 10: Peripheral immune cell dynamics induced by combination therapy**

Supplement: ccr-22-3642_figure_s10_suppfs10.docx [file ccr-22-3642_figure_s10_suppfs10.docx]
